# Supplementary material
Source: PubMed Central journal article supplement (PMC2891182)
Supplement: NIHMS172196-supplement-4_si_004.pdf [file NIHMS172196-supplement-4_si_004.pdf]

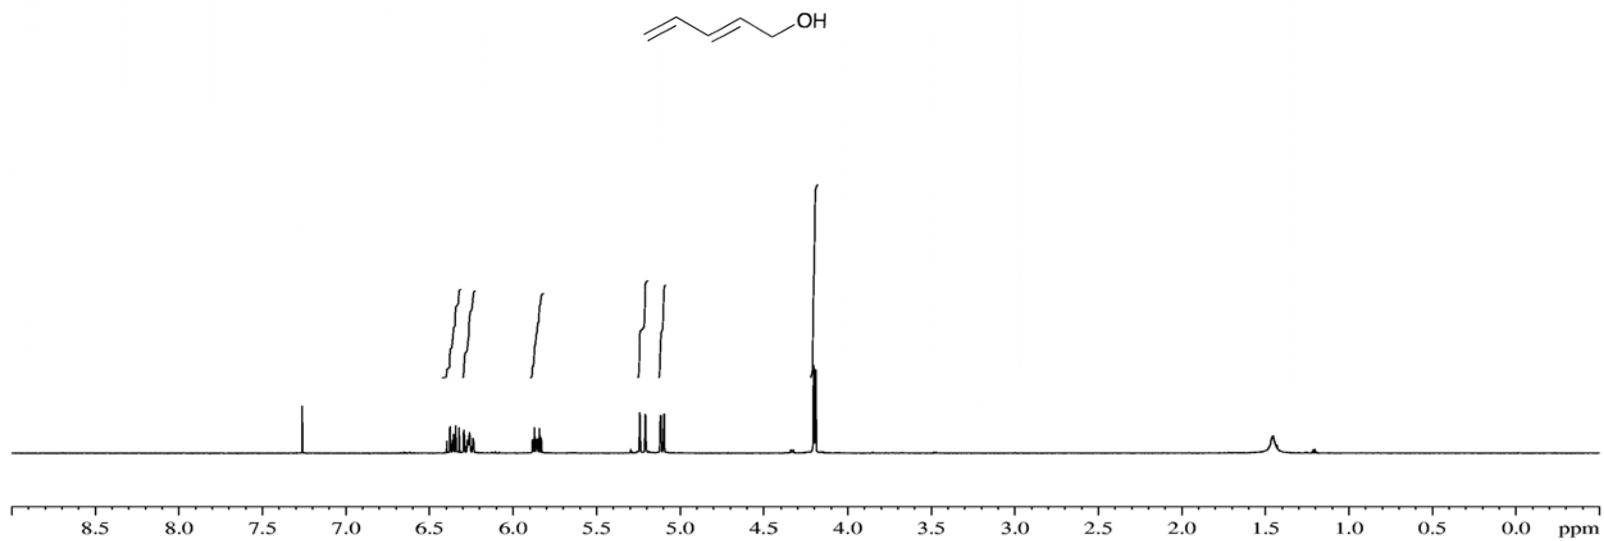

The  $^1\text{H}$  NMR Spectrum of Compound 17 in  $\text{CDCl}_3$

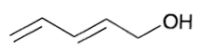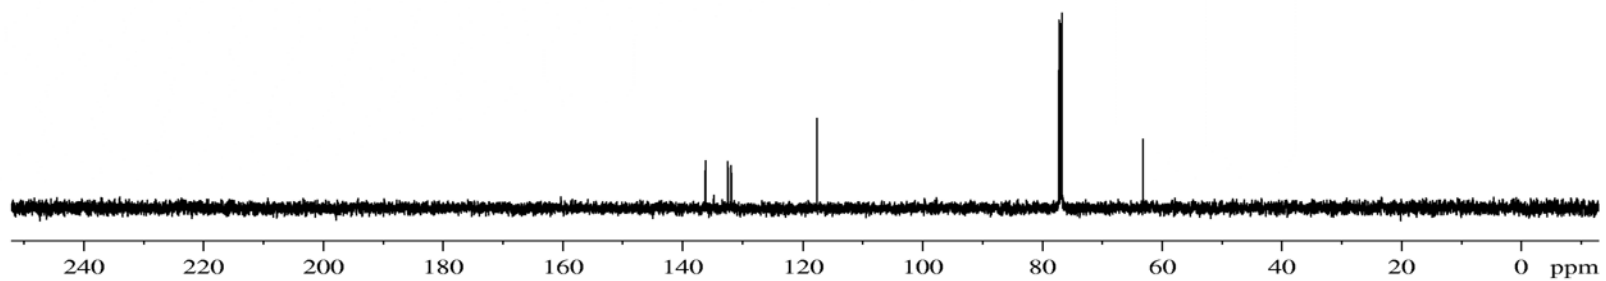

The  $^{13}\text{C}$  NMR Spectrum of Compound 17 in  $\text{CDCl}_3$

S97

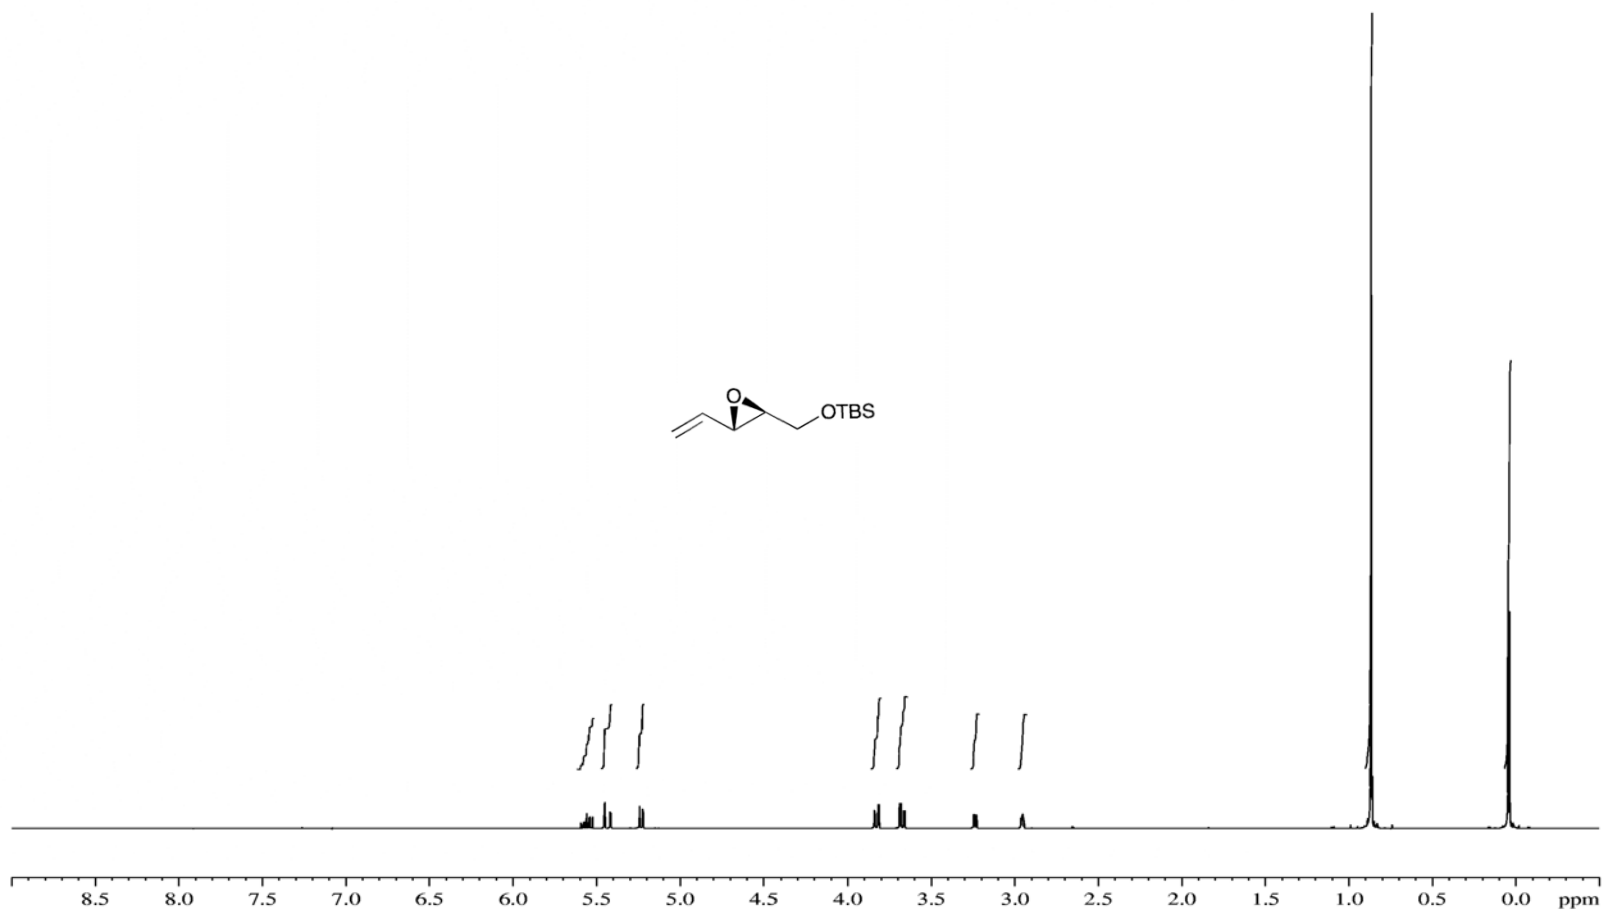

The <sup>1</sup>H NMR Spectrum of Compound (-)-14 in CDCl<sub>3</sub>

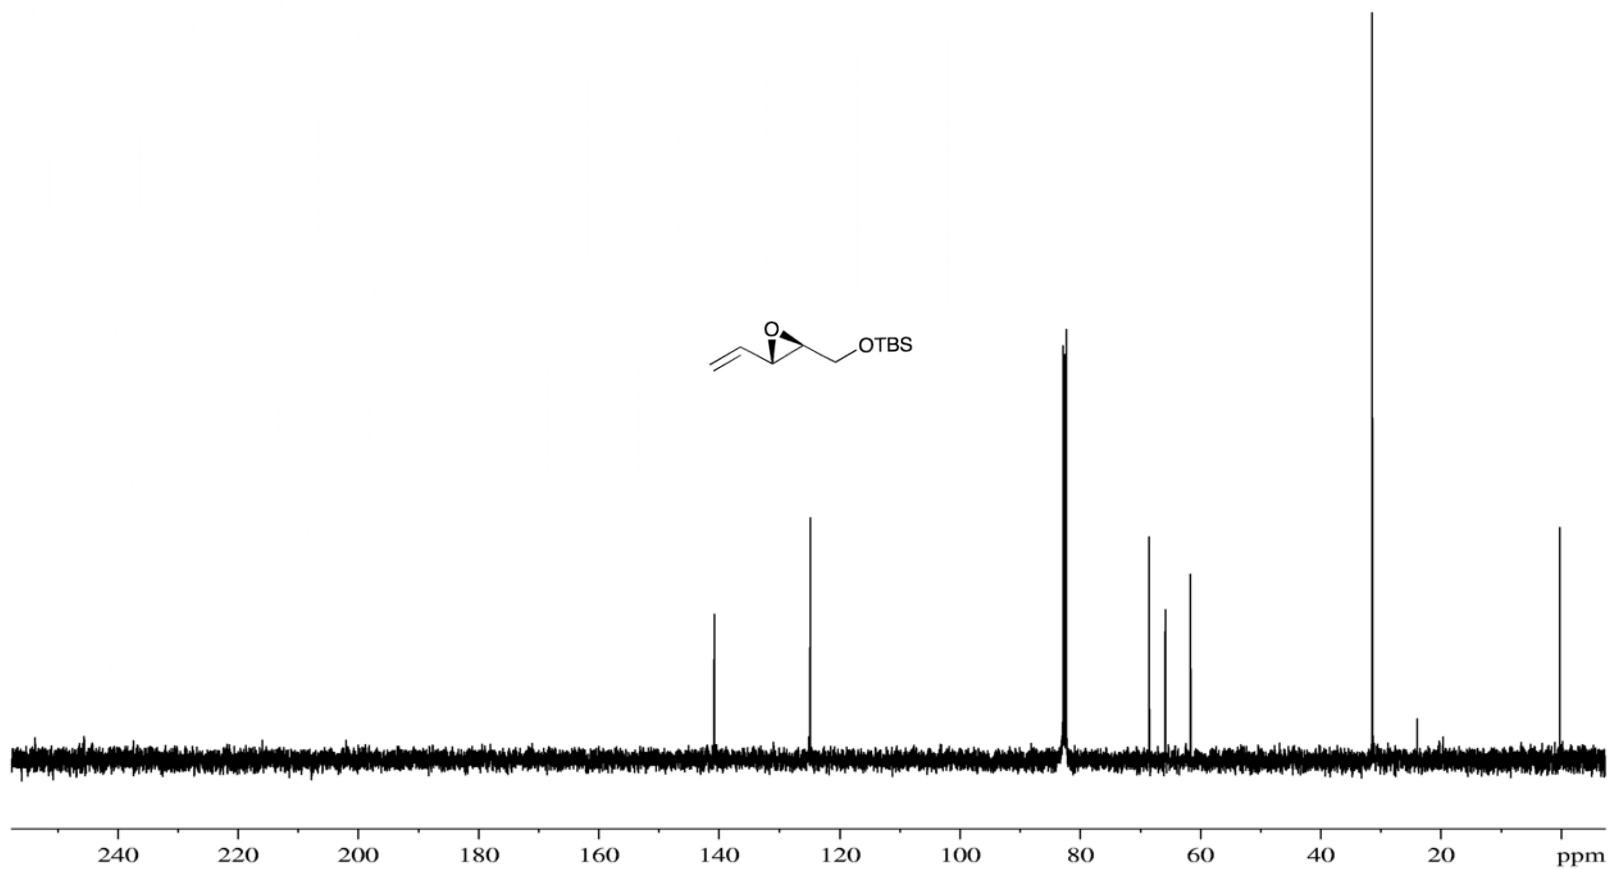

The  $^{13}\text{C}$  NMR Spectrum of Compound (-)-14 in  $\text{CDCl}_3$

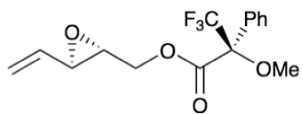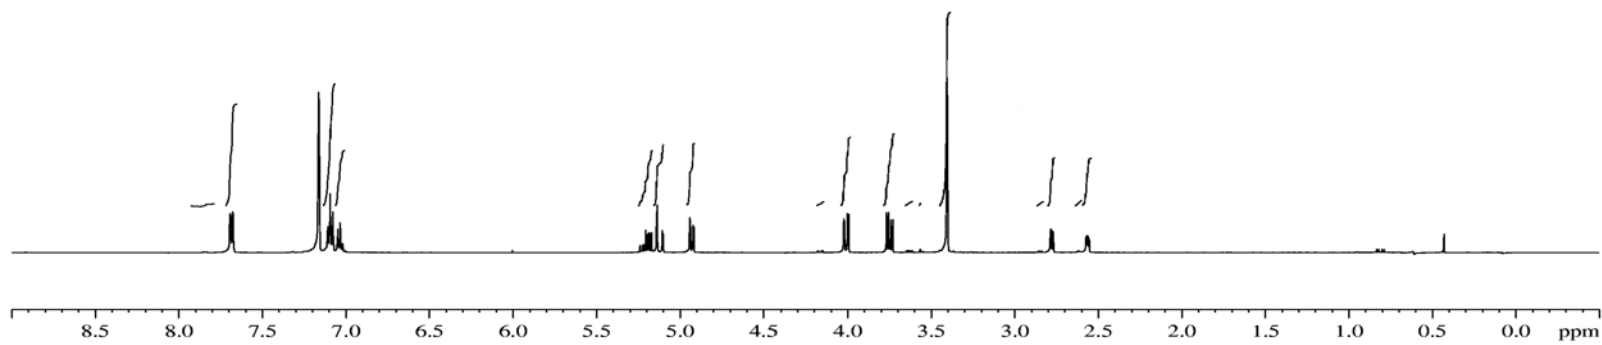

The <sup>1</sup>H NMR Spectrum of Compound (-)-**S1** in C<sub>6</sub>D<sub>6</sub>

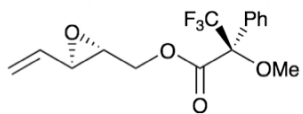

S100

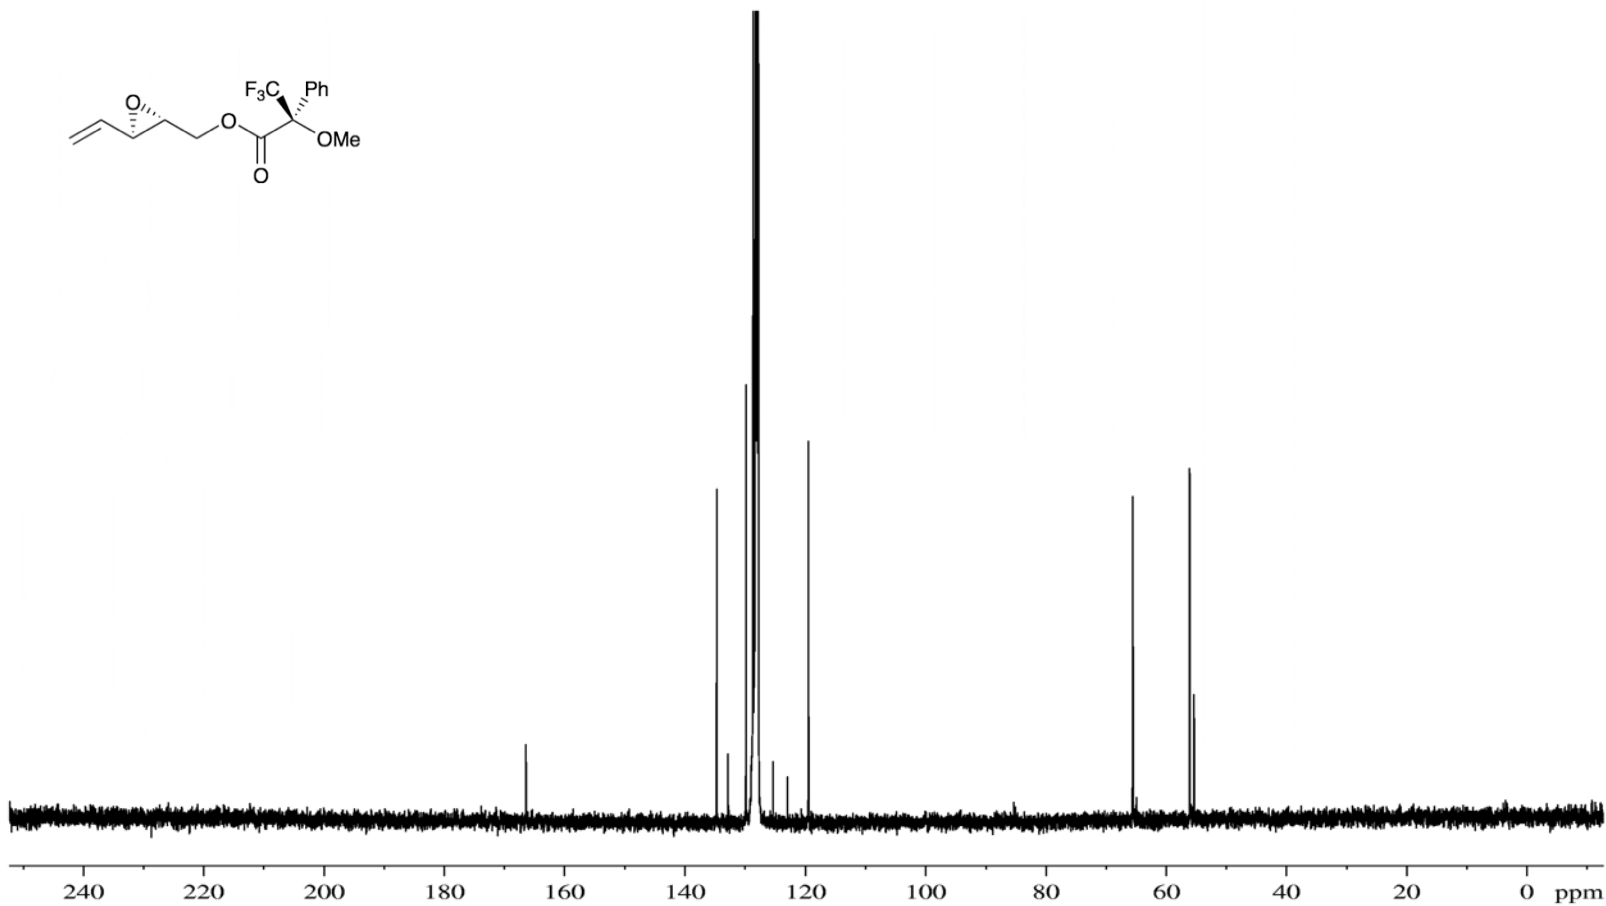

The <sup>13</sup>C NMR Spectrum of Compound (-)-**S1** in C<sub>6</sub>D<sub>6</sub>

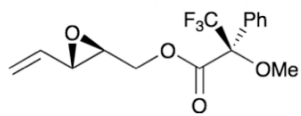

S101

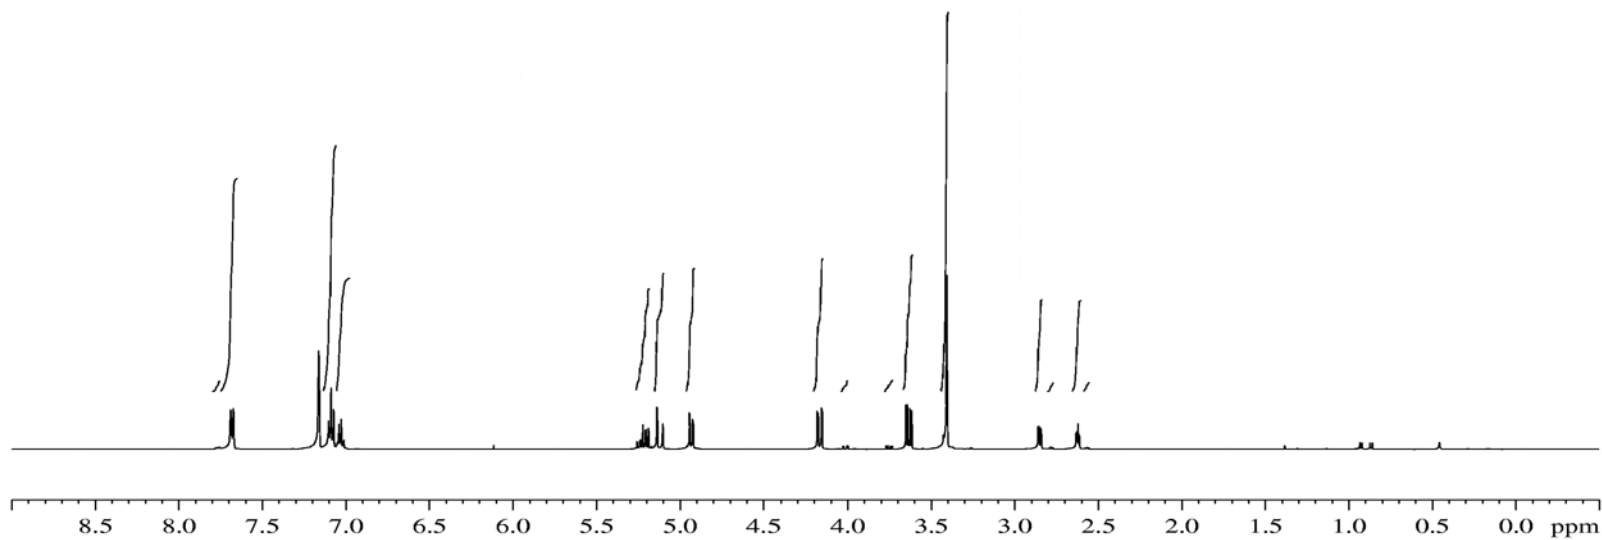

The <sup>1</sup>H NMR Spectrum of Compound (-)-**S2** in C<sub>6</sub>D<sub>6</sub>

S102

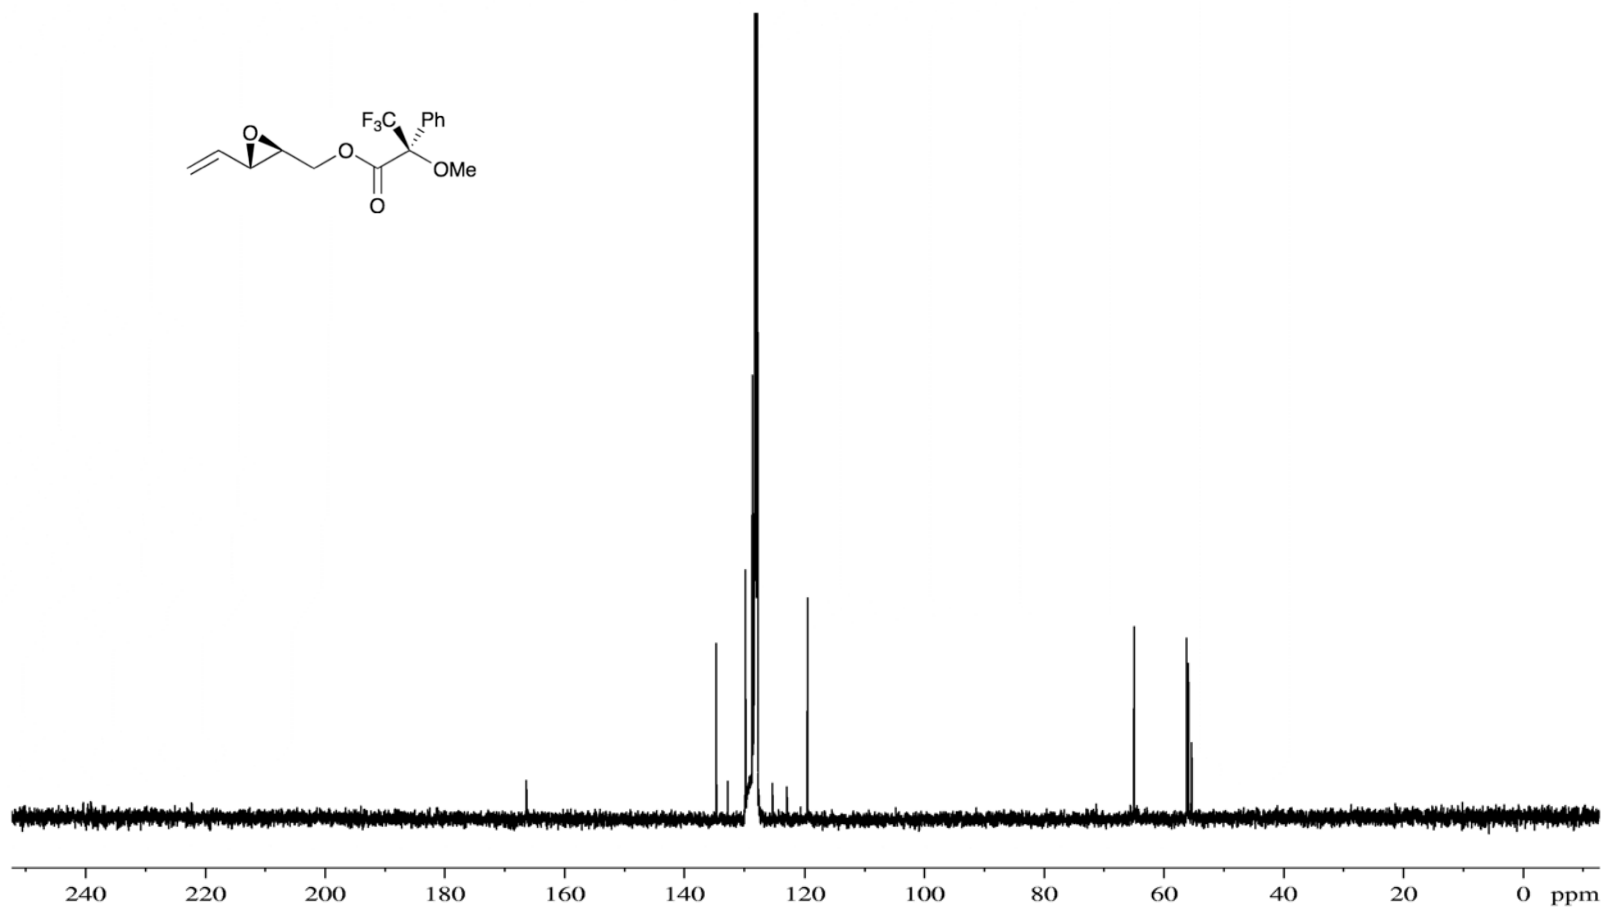

The  $^{13}\text{C}$  NMR Spectrum of Compound (-)-**S2** in  $\text{C}_6\text{D}_6$



S103

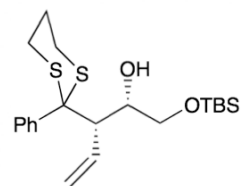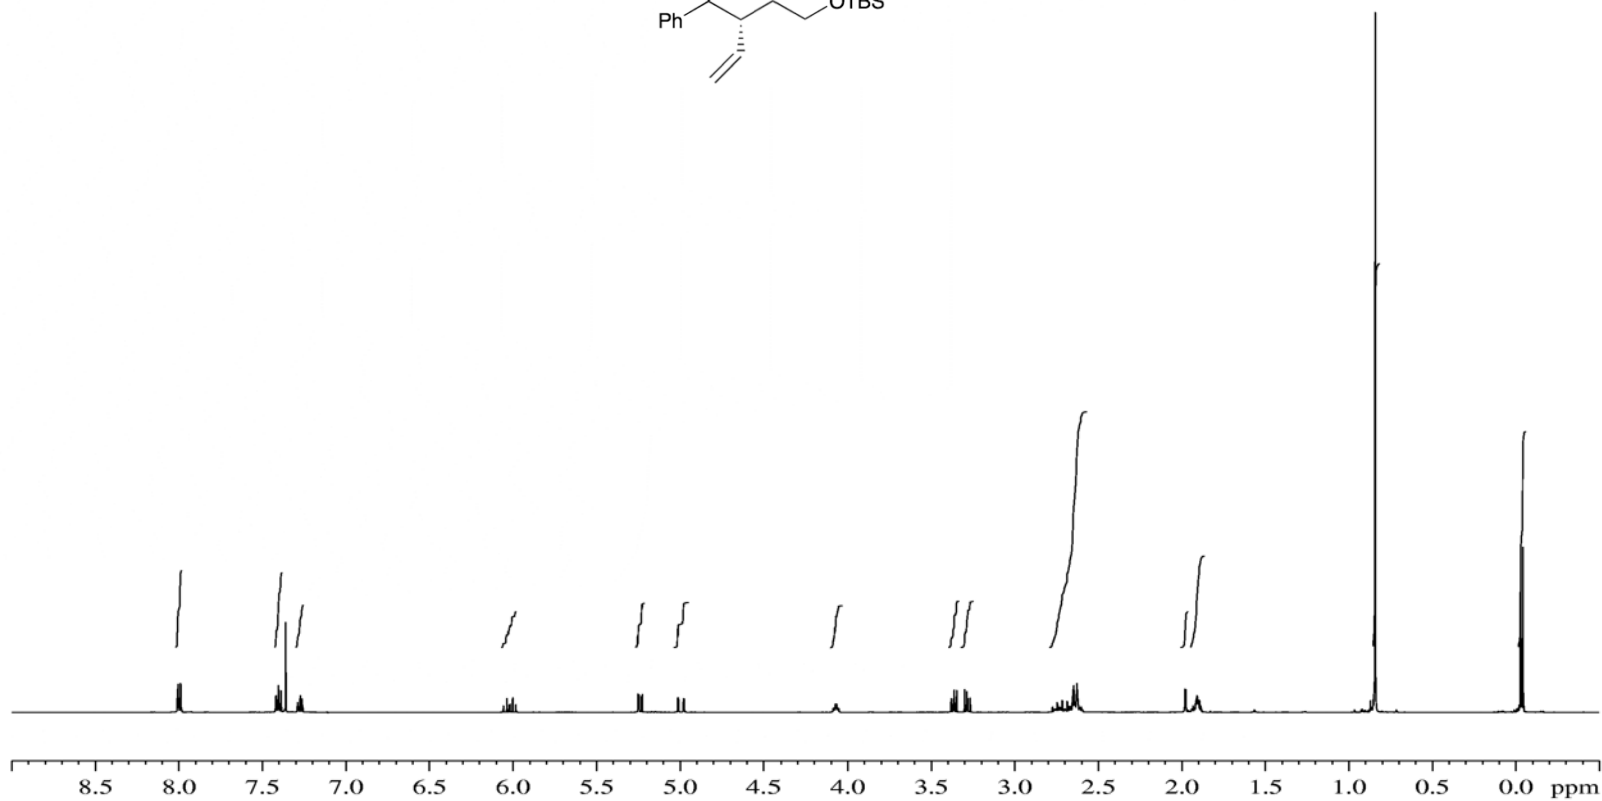

The  $^1\text{H}$  NMR Spectrum of Compound (+)-19 in  $\text{CDCl}_3$

S104

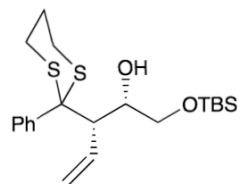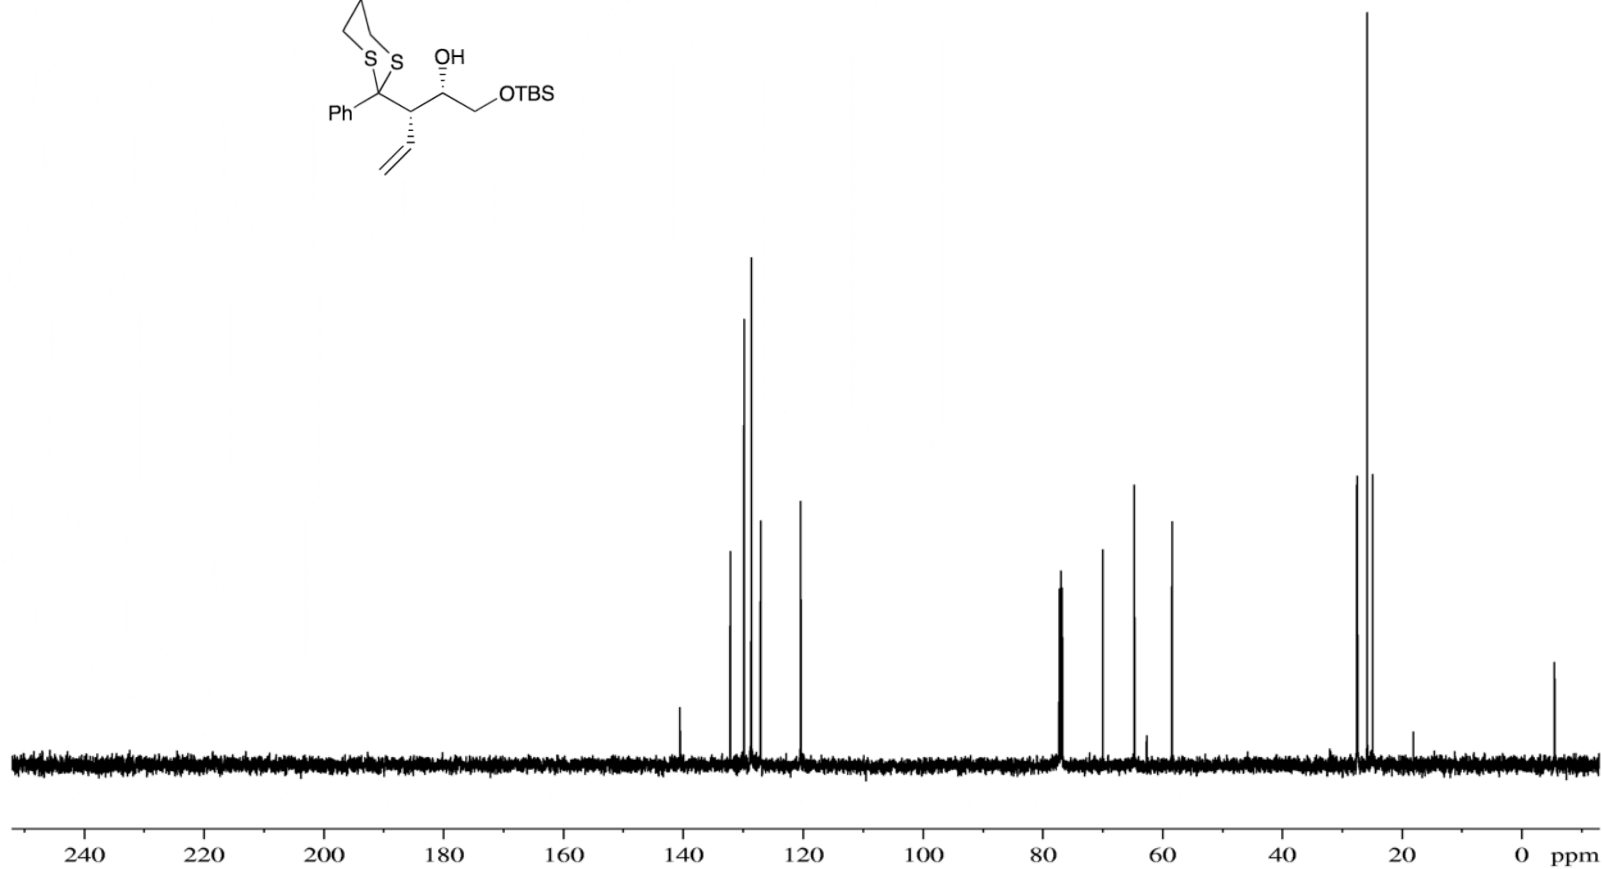

The  $^{13}\text{C}$  NMR Spectrum of Compound (+)-**19** in  $\text{CDCl}_3$

S105

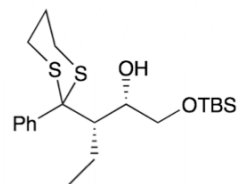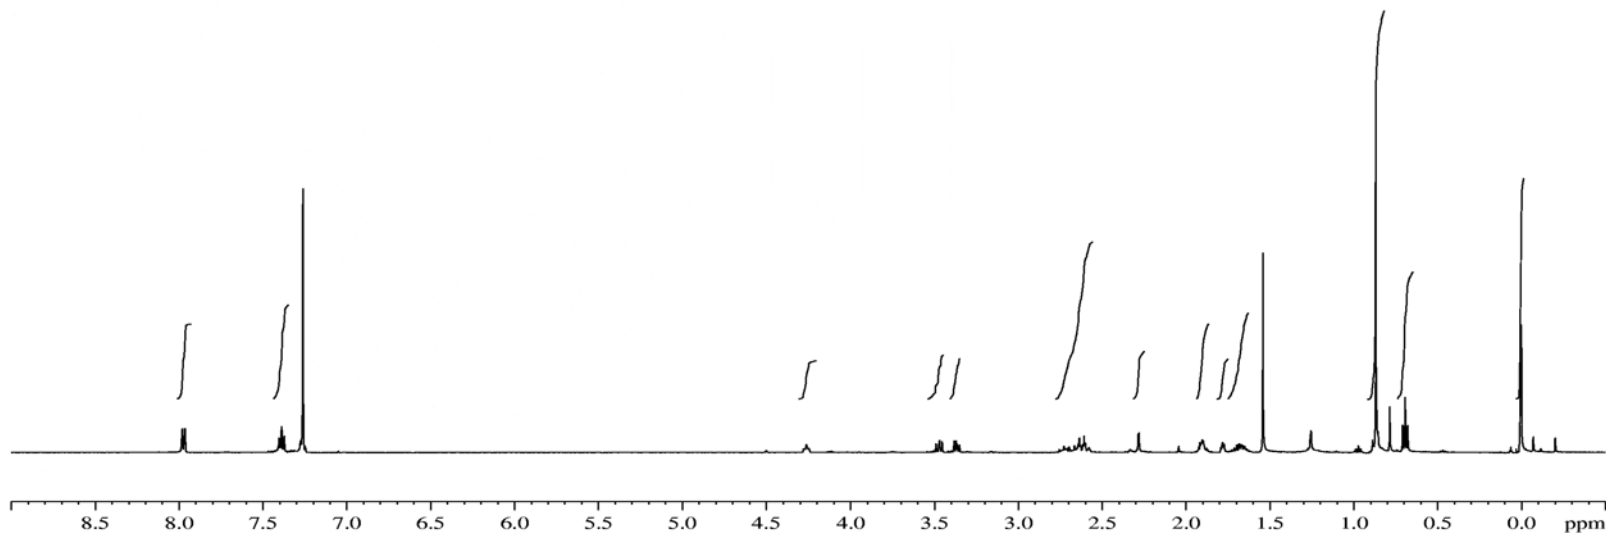

The <sup>1</sup>H NMR Spectrum of Compound (+)-**S3** in CDCl<sub>3</sub>

S106

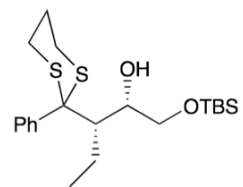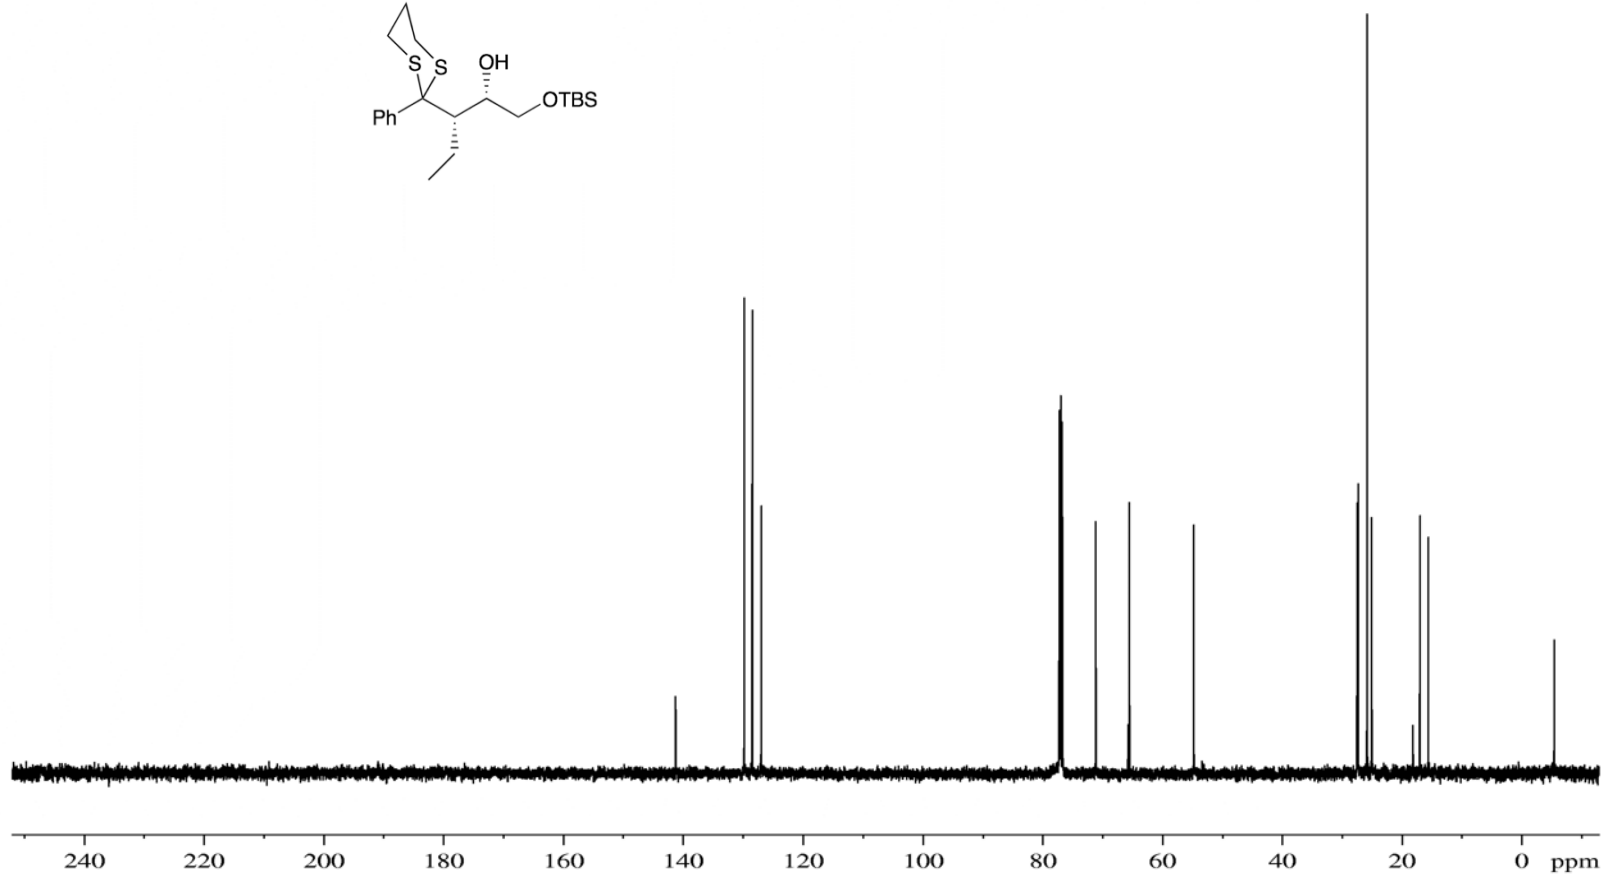

The  $^{13}\text{C}$  NMR Spectrum of Compound (+)-**S3** in  $\text{CDCl}_3$

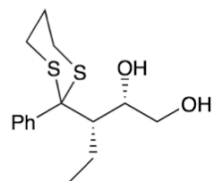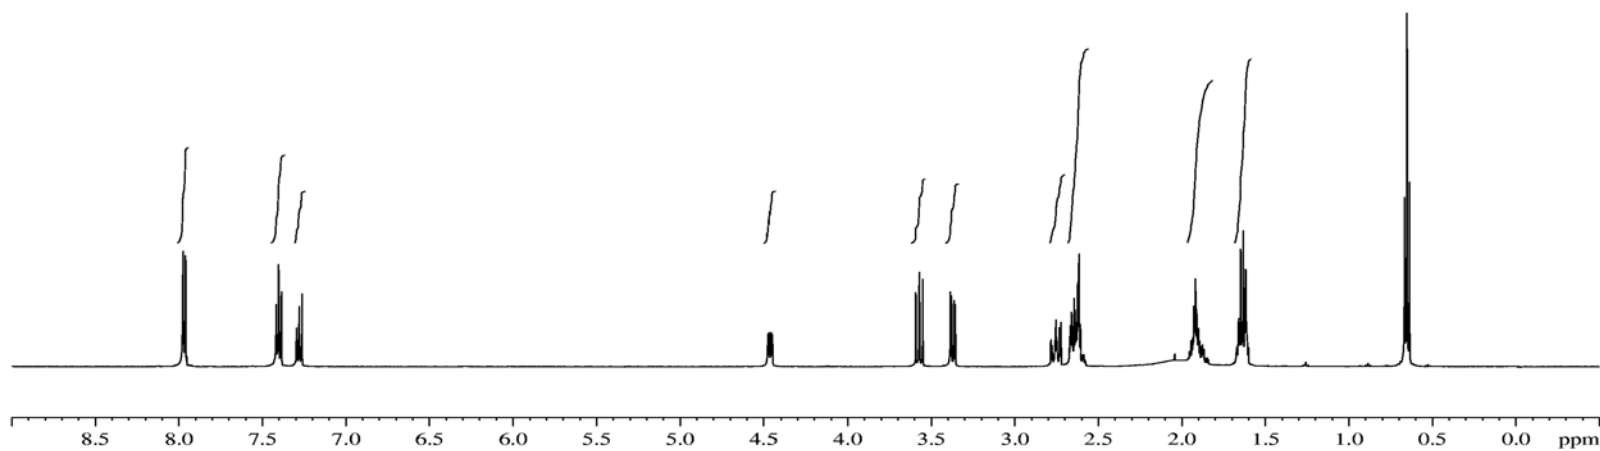

S107

The <sup>1</sup>H NMR Spectrum of Compound (+)-10 in CDCl<sub>3</sub>

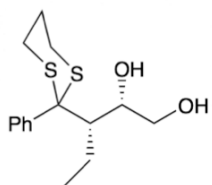

S108

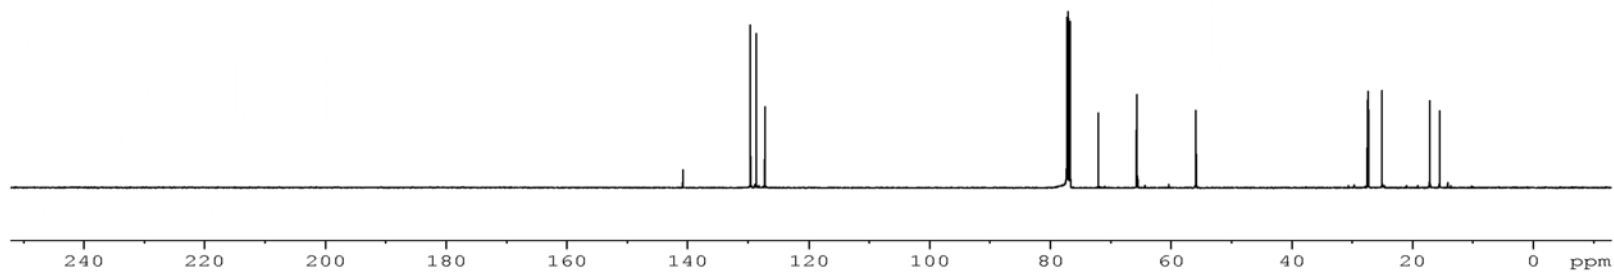

The <sup>13</sup>C NMR Spectrum of Compound (+)-**10** in CDCl<sub>3</sub>

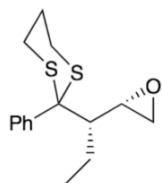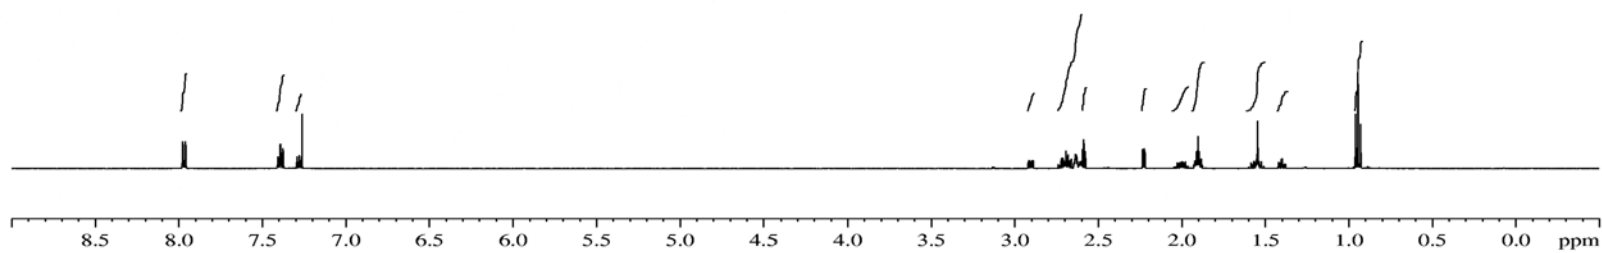

The <sup>1</sup>H NMR Spectrum of Compound (+)-**20** in CDCl<sub>3</sub>

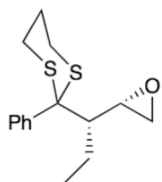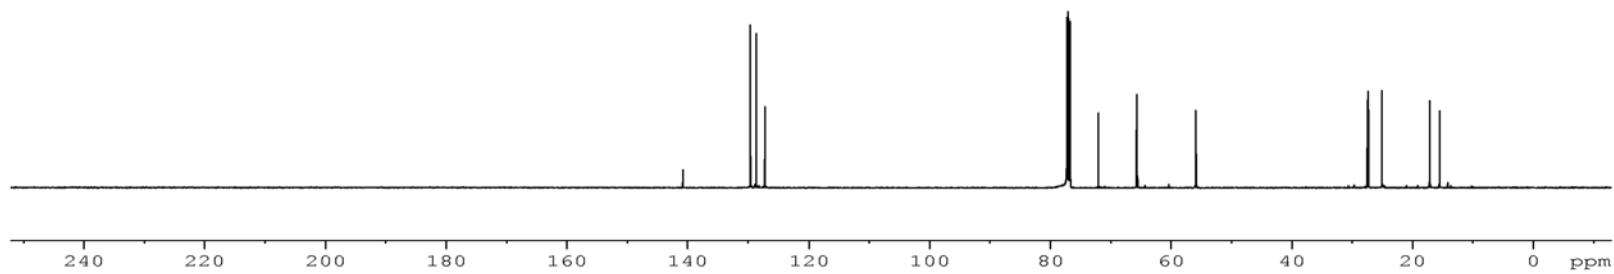

The  $^{13}\text{C}$  NMR Spectrum of Compound (+)-**20** in  $\text{CDCl}_3$



S111

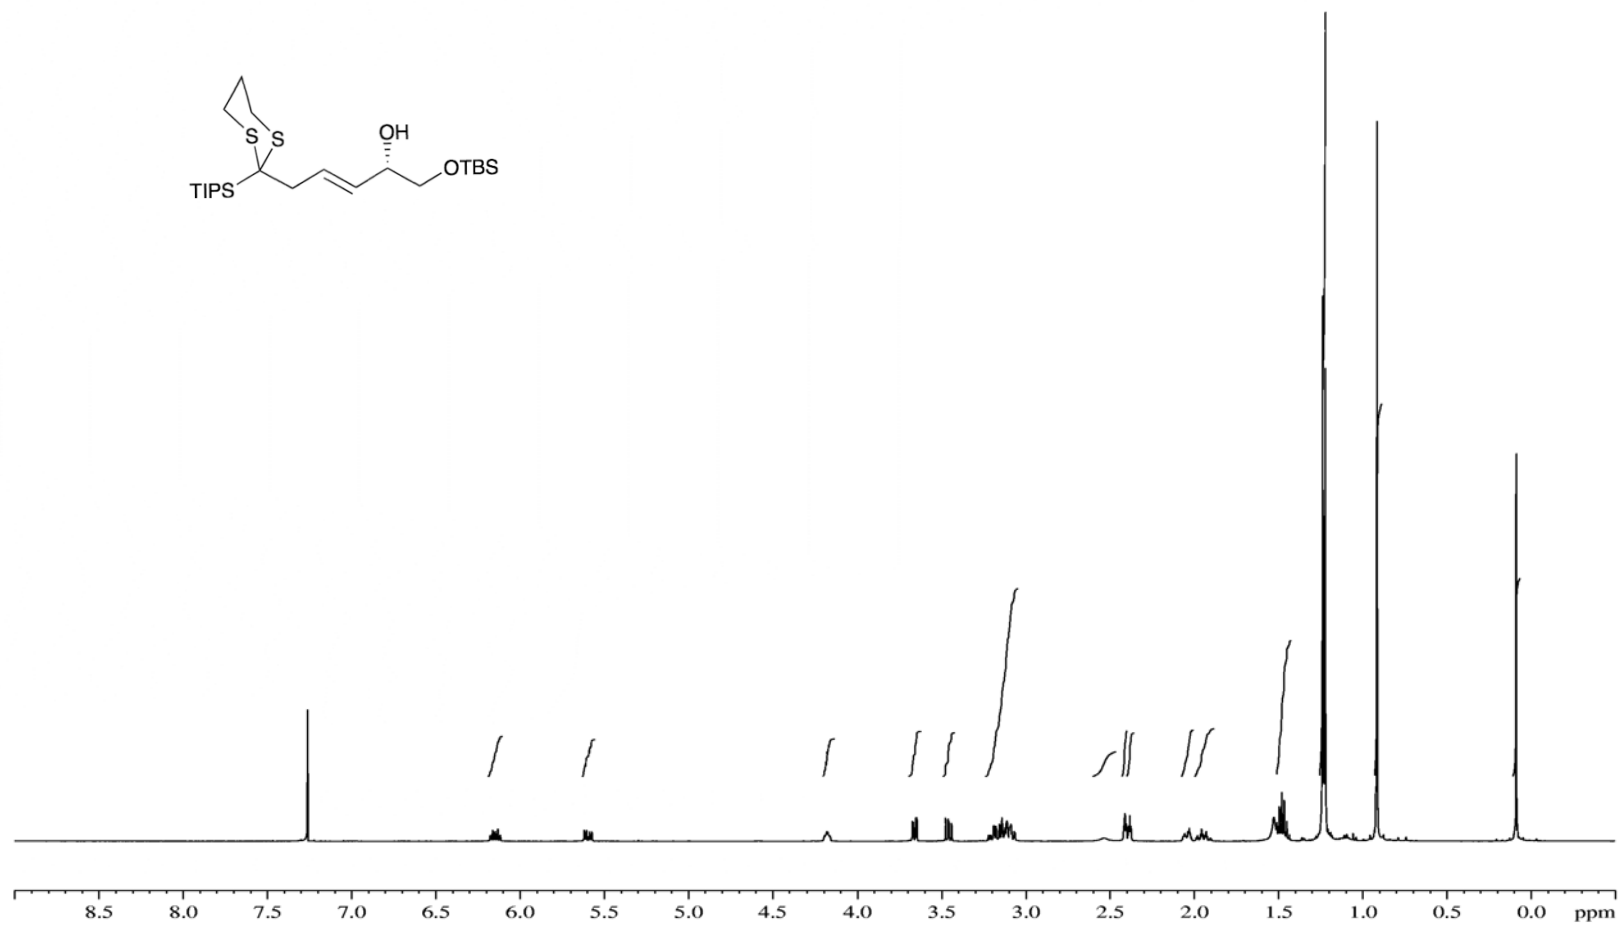

The  $^1\text{H}$  NMR Spectrum of Compound (+)-**22** in  $\text{CDCl}_3$

S112

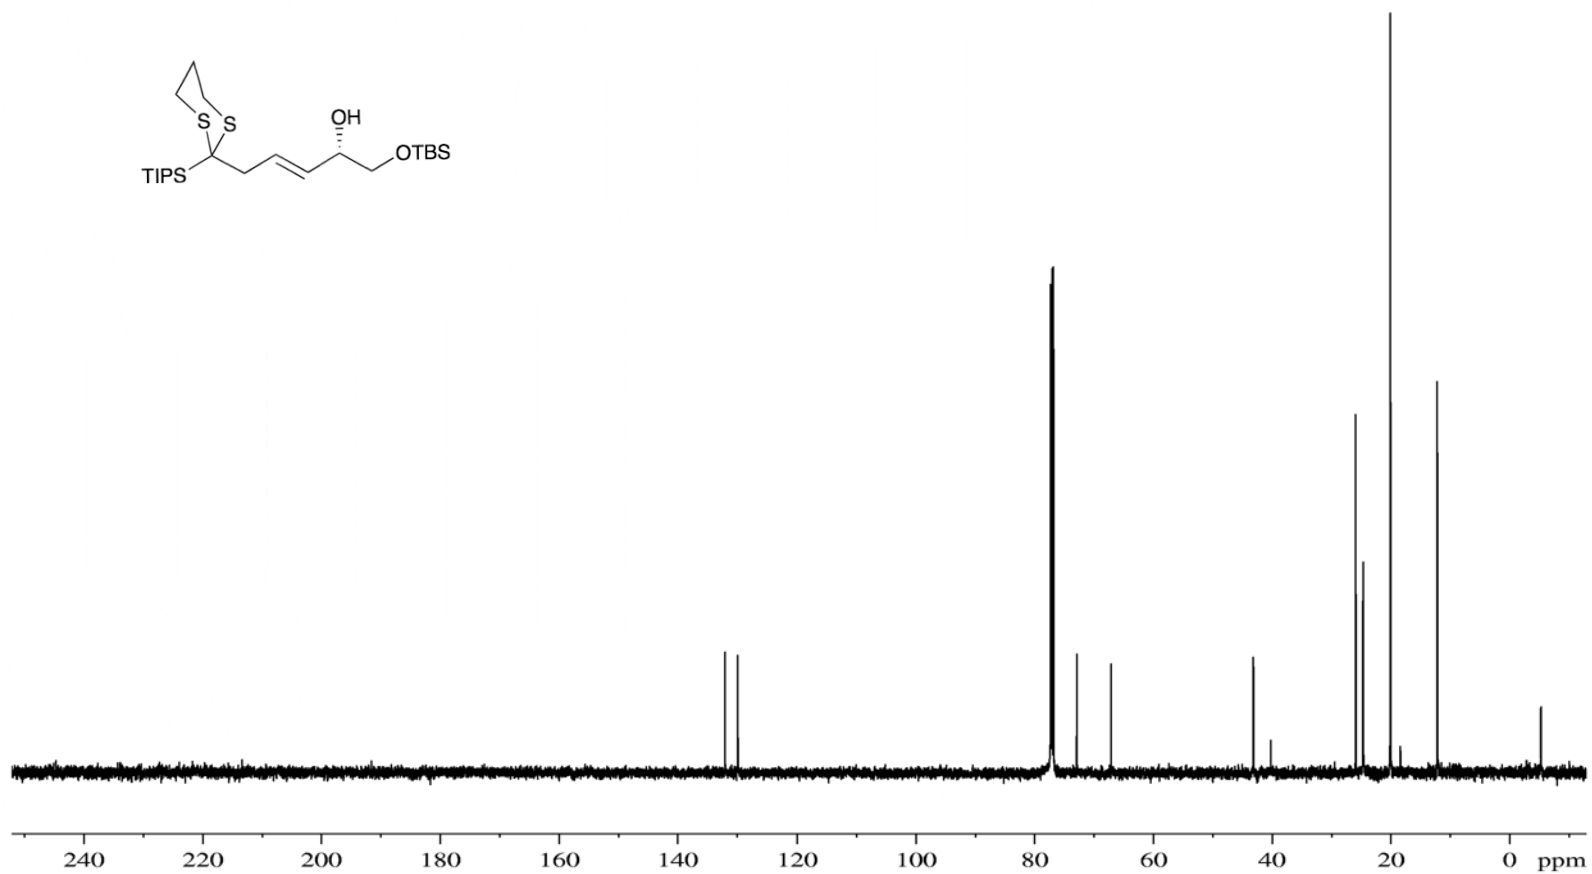

The <sup>13</sup>C NMR Spectrum of Compound (+)-**22** in CDCl<sub>3</sub>

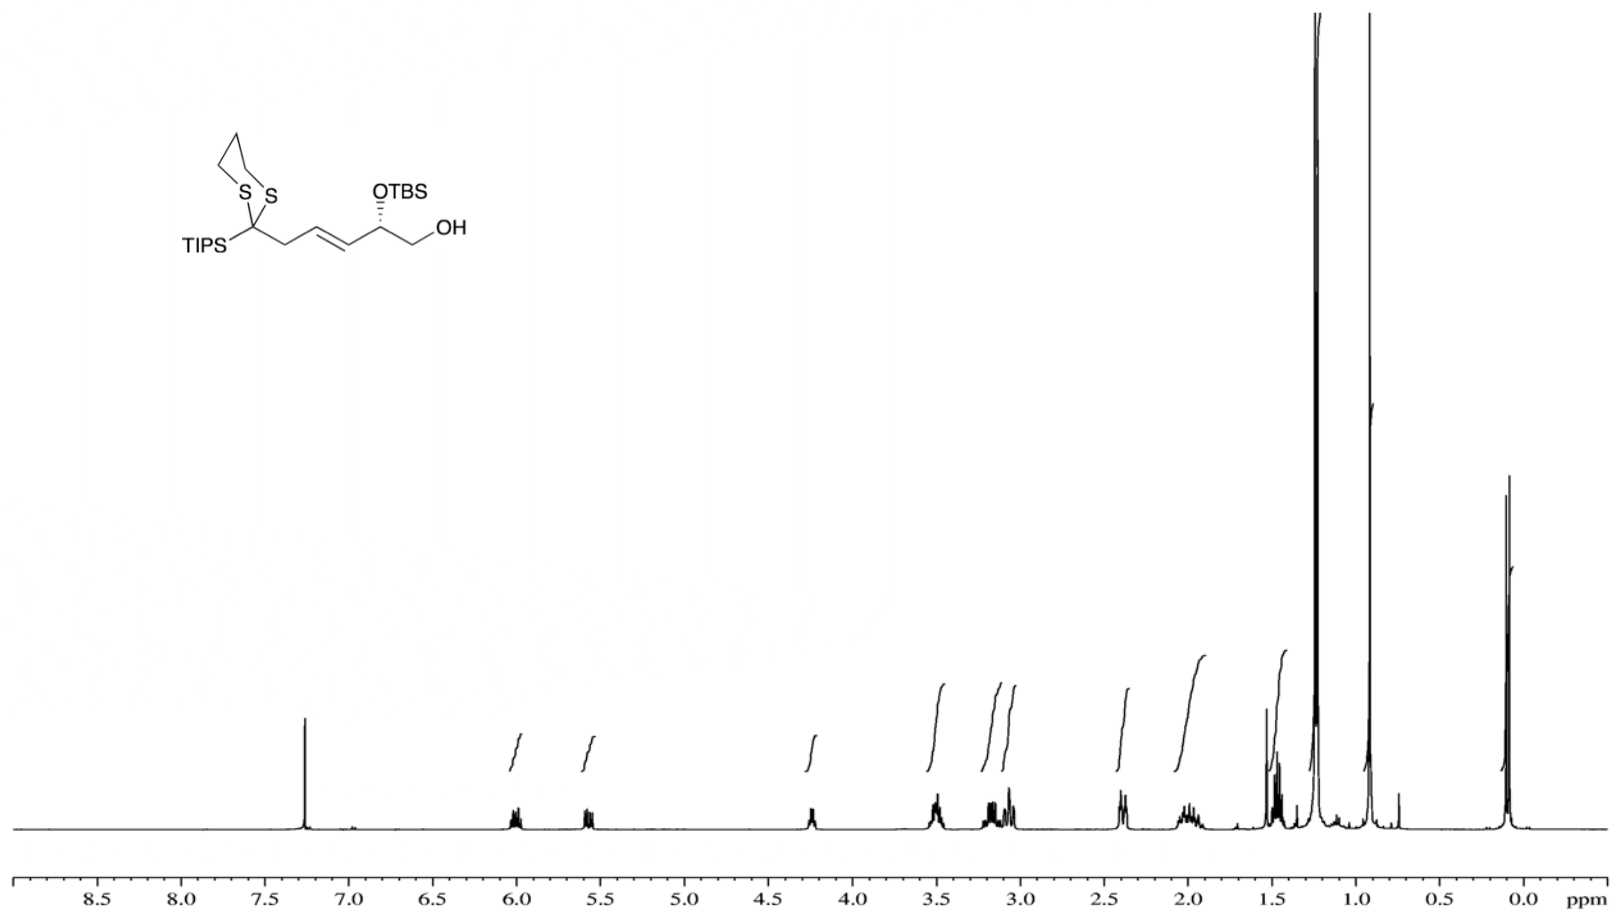

The  $^1\text{H}$  NMR Spectrum of Compound (+)-**23** in  $\text{CDCl}_3$

S114

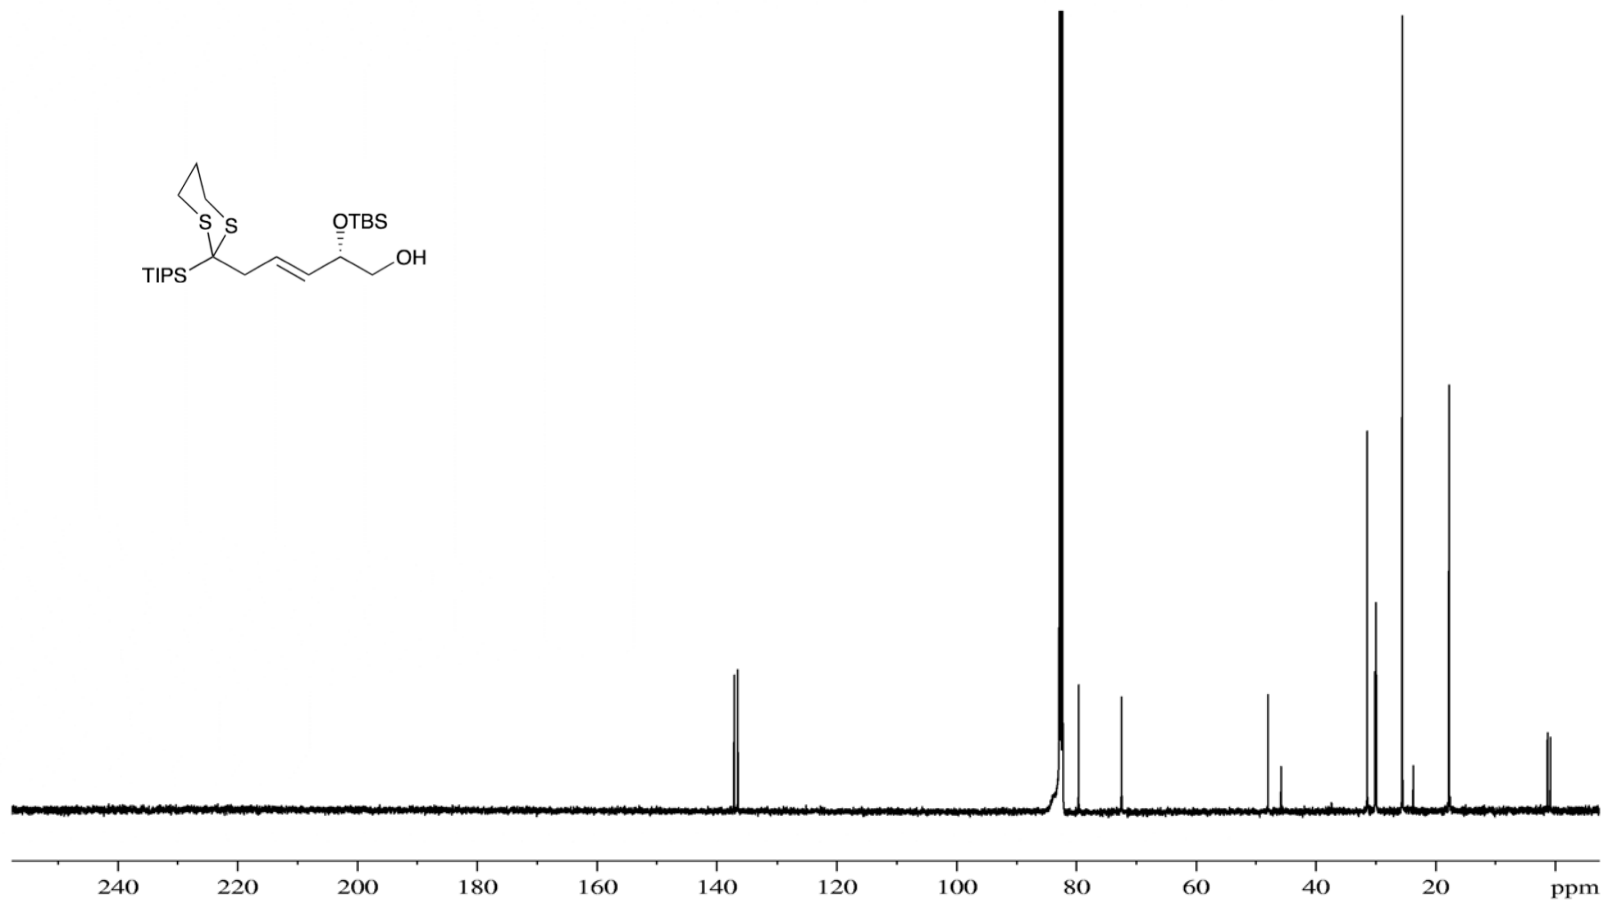

The  $^{13}\text{C}$  NMR Spectrum of Compound (+)-**23** in  $\text{CDCl}_3$

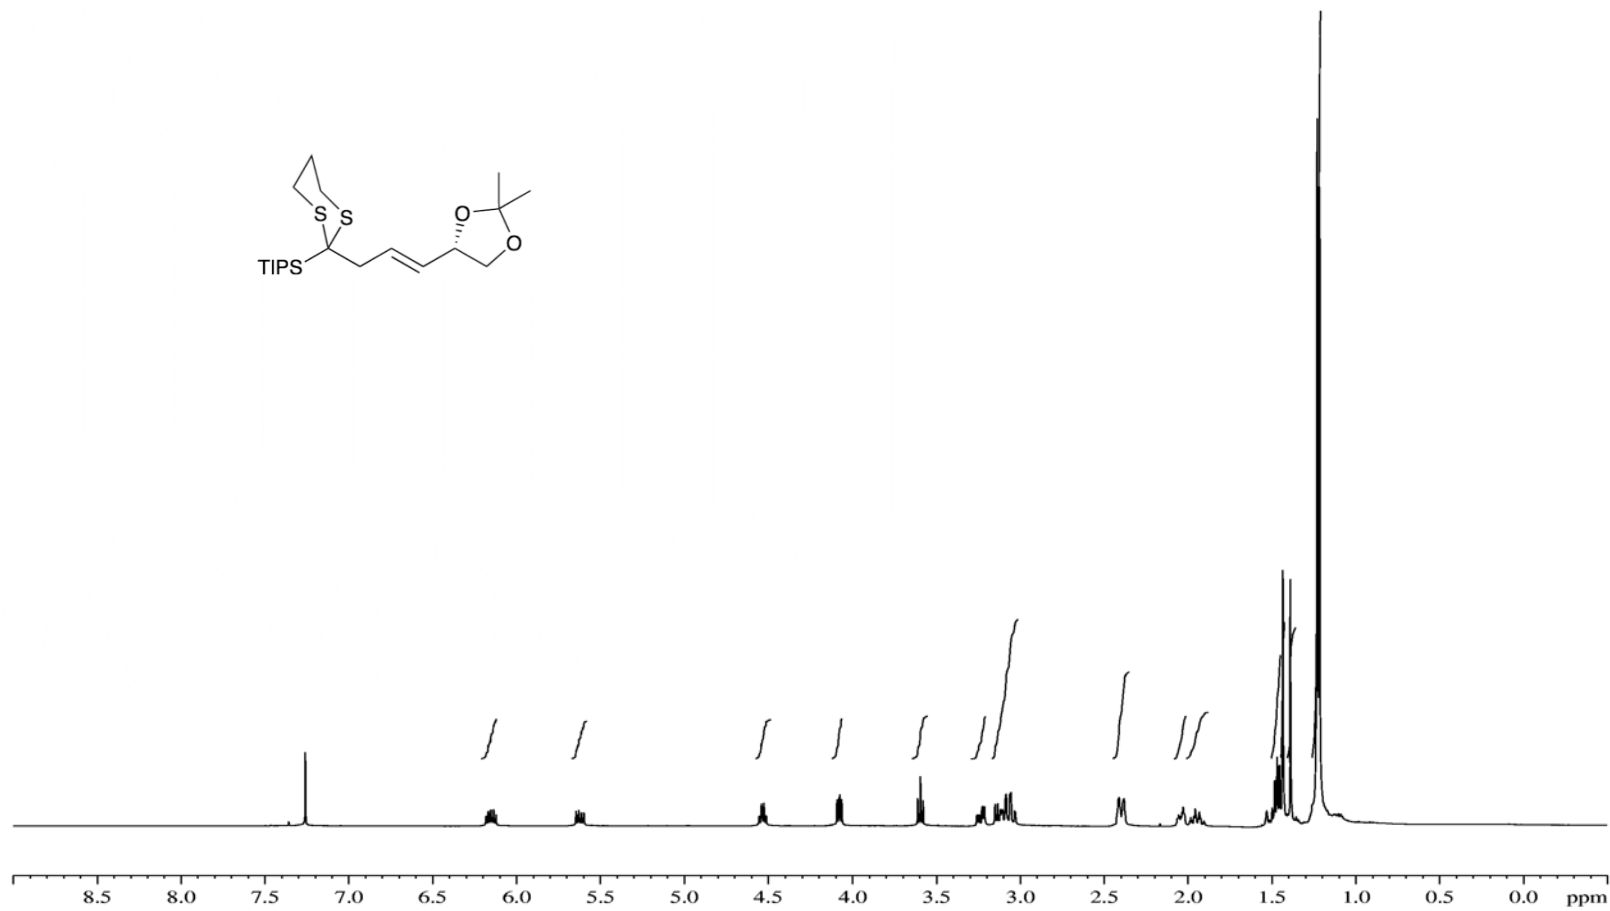

The <sup>1</sup>H NMR Spectrum of Compound (+)-**S4** in CDCl<sub>3</sub>

S116

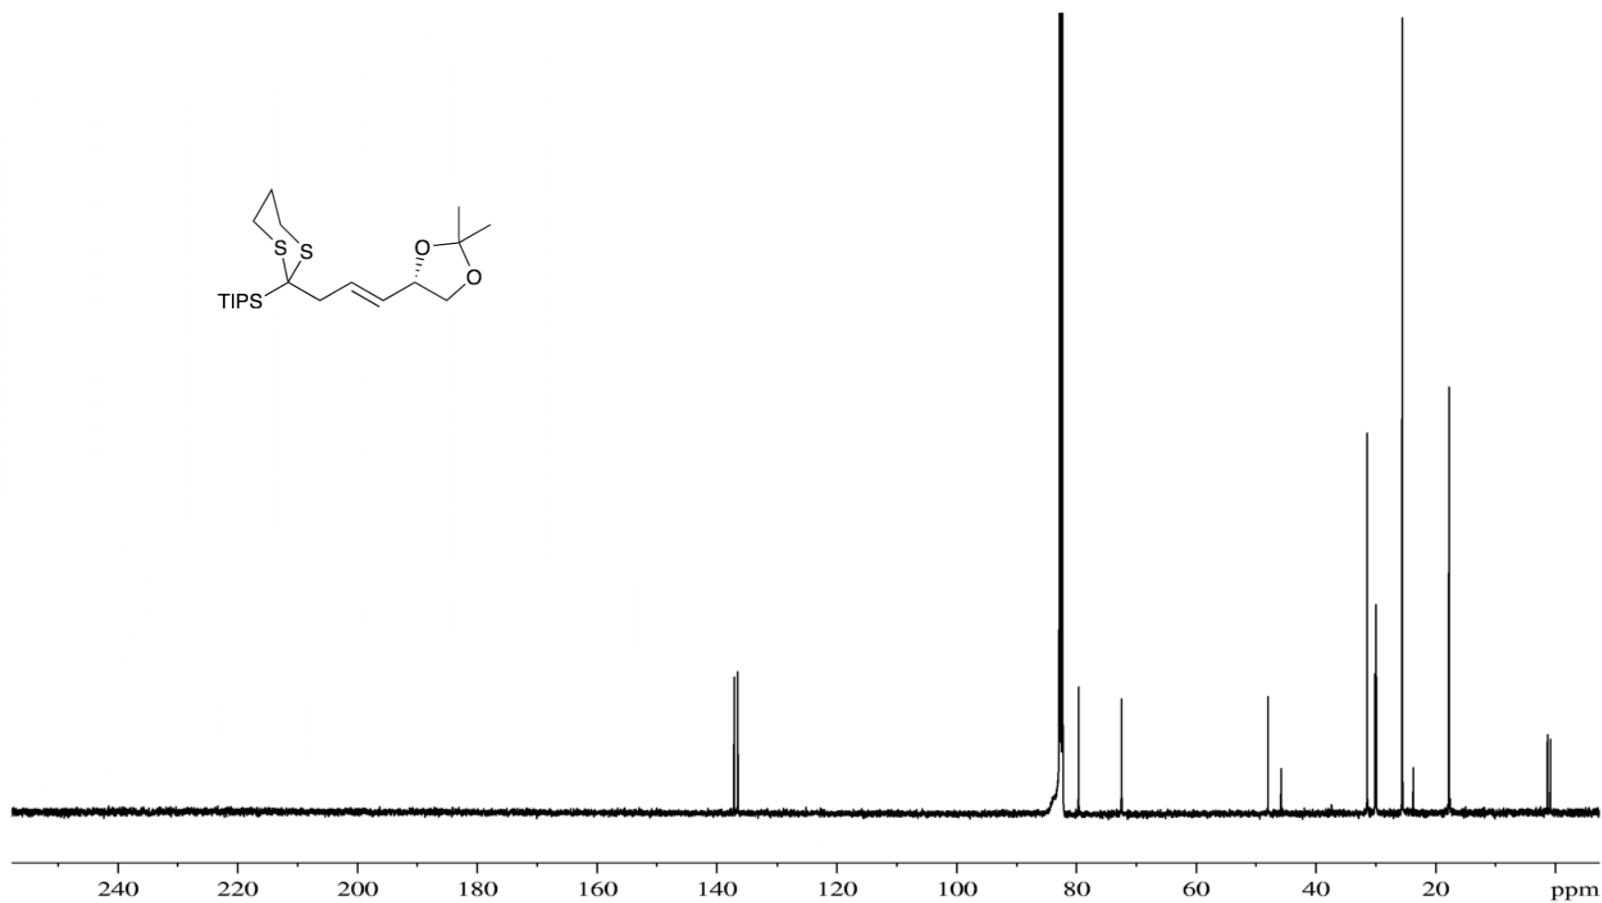

The  $^{13}\text{C}$  NMR Spectrum of Compound (+)-**S4** in  $\text{CDCl}_3$

S117

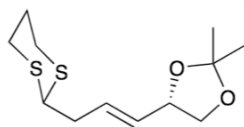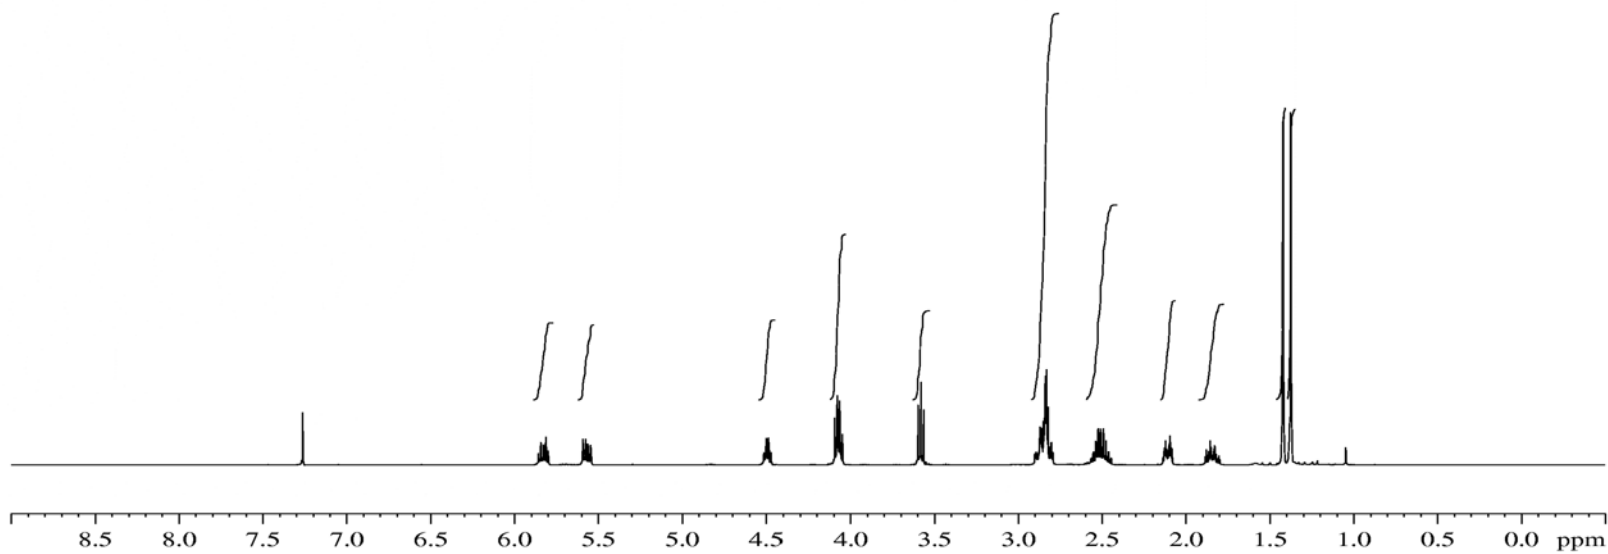

The <sup>1</sup>H NMR Spectrum of Compound (+)-**24** in CDCl<sub>3</sub>

S118

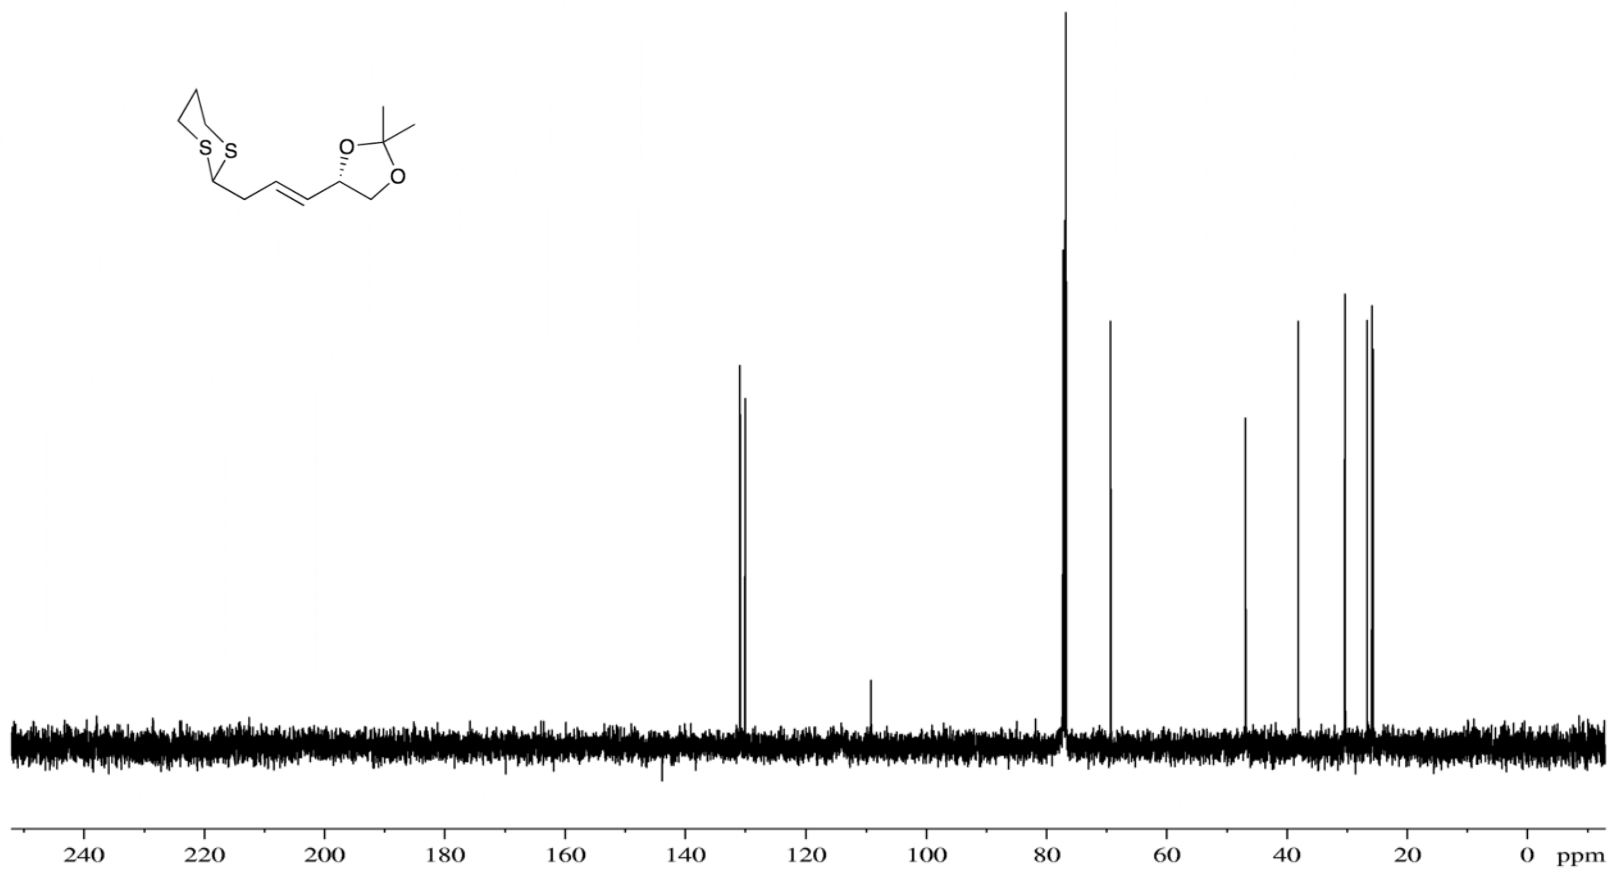

The  $^{13}\text{C}$  NMR Spectrum of Compound (+)-**24** in  $\text{CDCl}_3$



S119

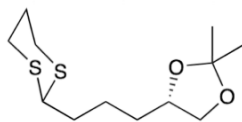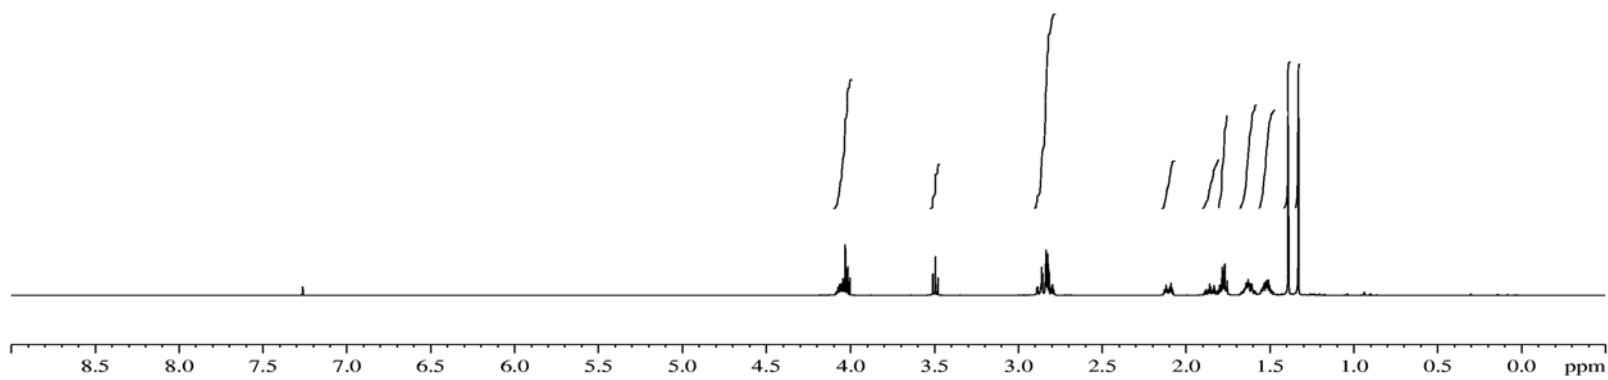

The <sup>1</sup>H NMR Spectrum of Compound (+)-**11** in CDCl<sub>3</sub>

S120

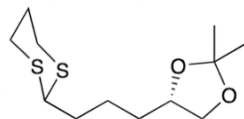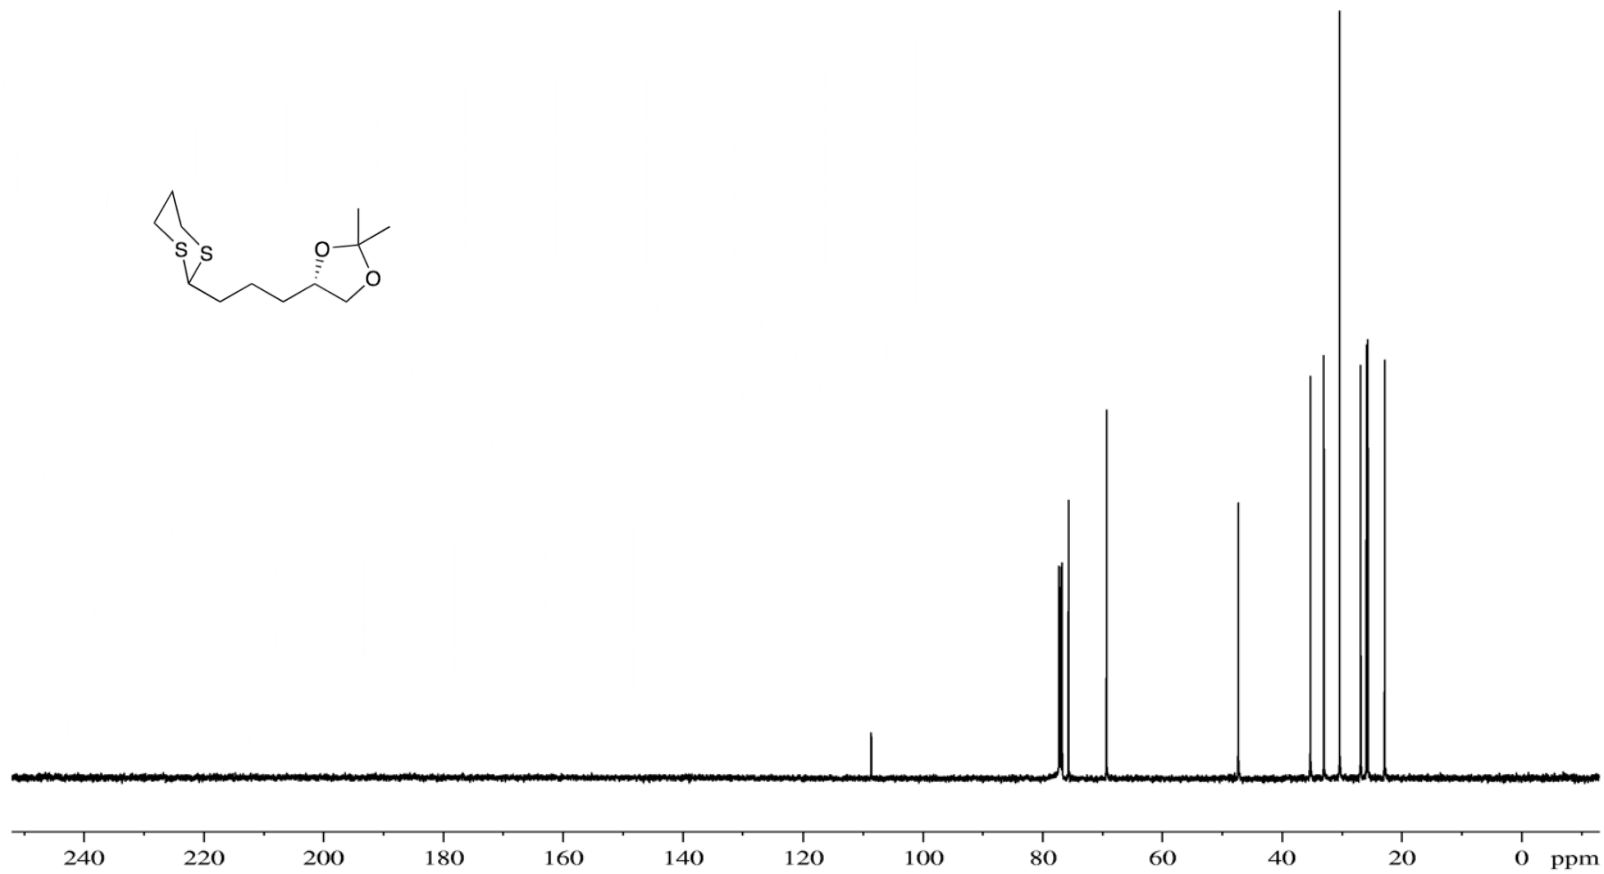

The <sup>13</sup>C NMR Spectrum of Compound (+)-**11** in CDCl<sub>3</sub>

S121

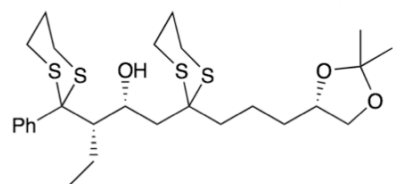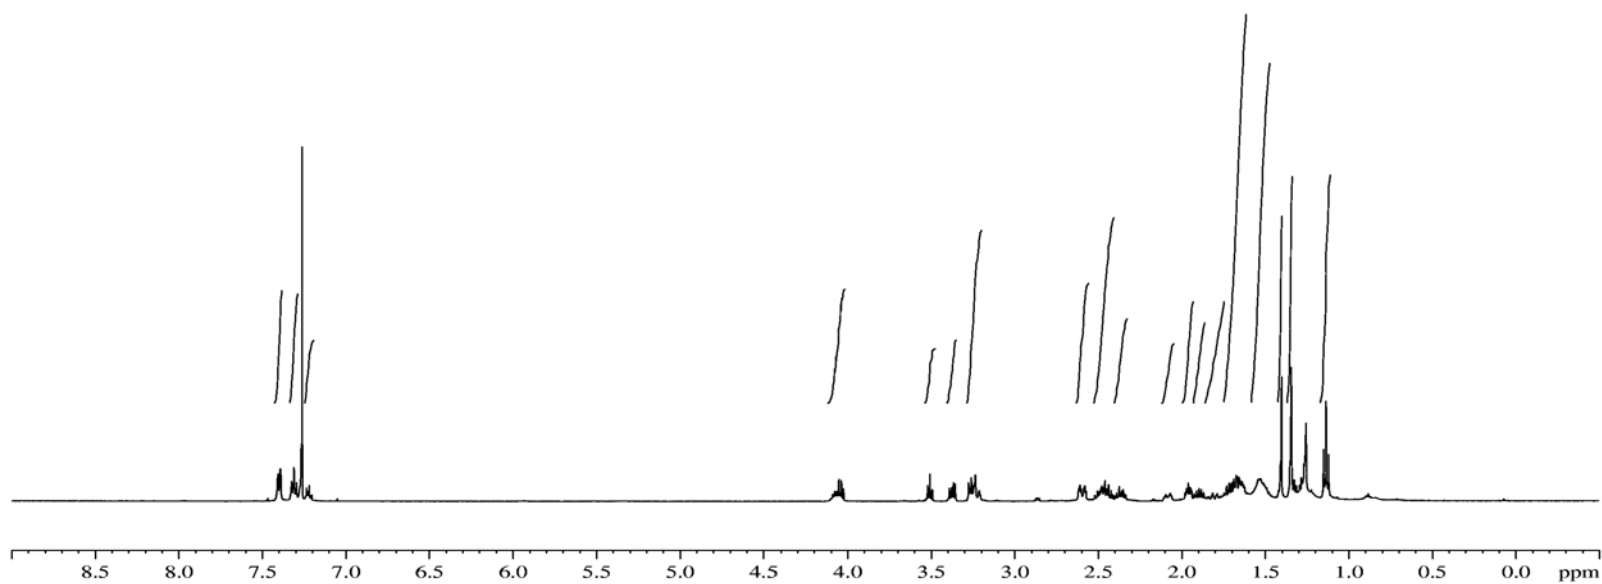

The <sup>1</sup>H NMR Spectrum of Compound (-)-25 in CDCl<sub>3</sub>

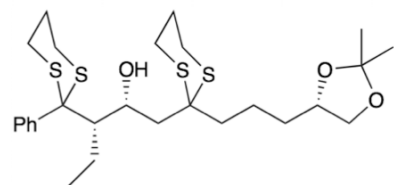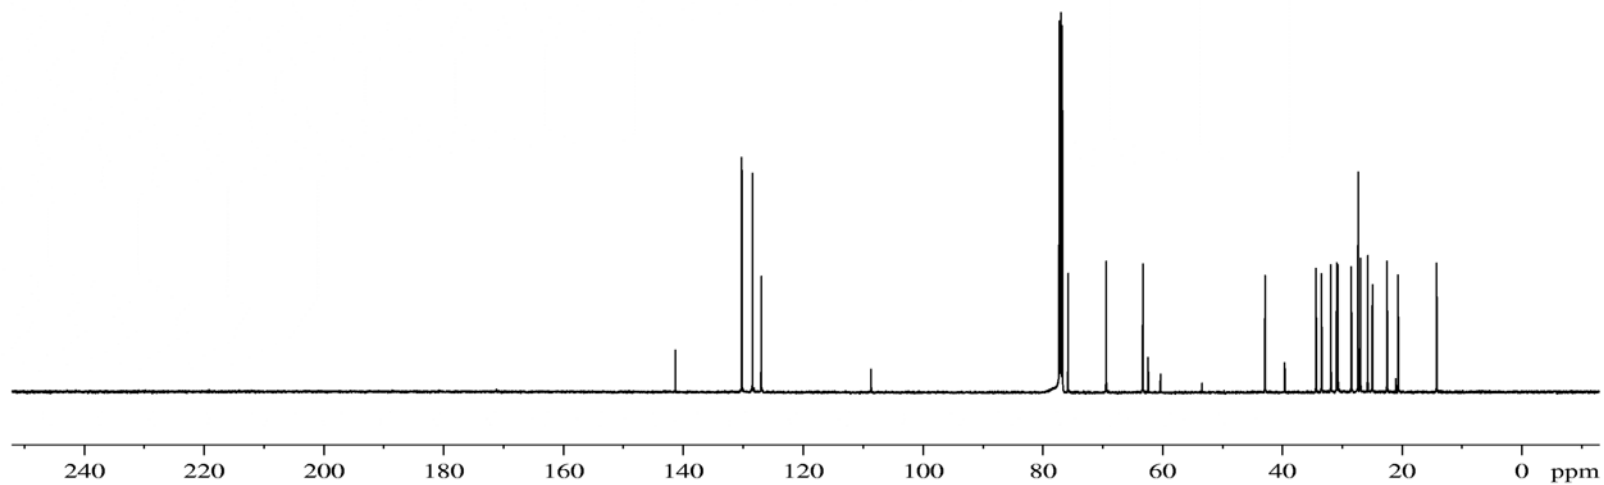

The  $^{13}\text{C}$  NMR Spectrum of Compound (-)-25 in  $\text{CDCl}_3$

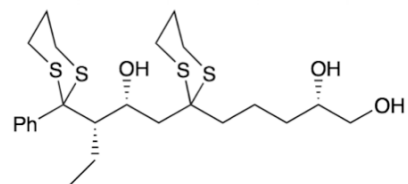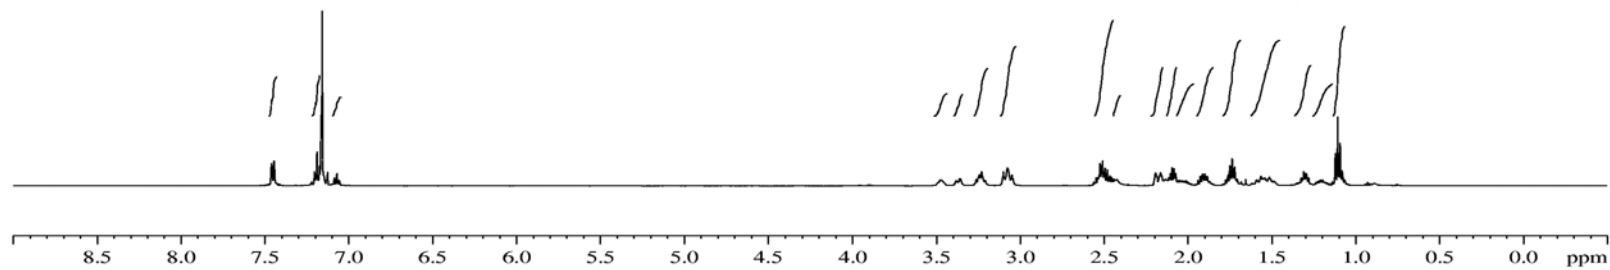

The <sup>1</sup>H NMR Spectrum of Compound (+)-**26** in C<sub>6</sub>D<sub>6</sub>

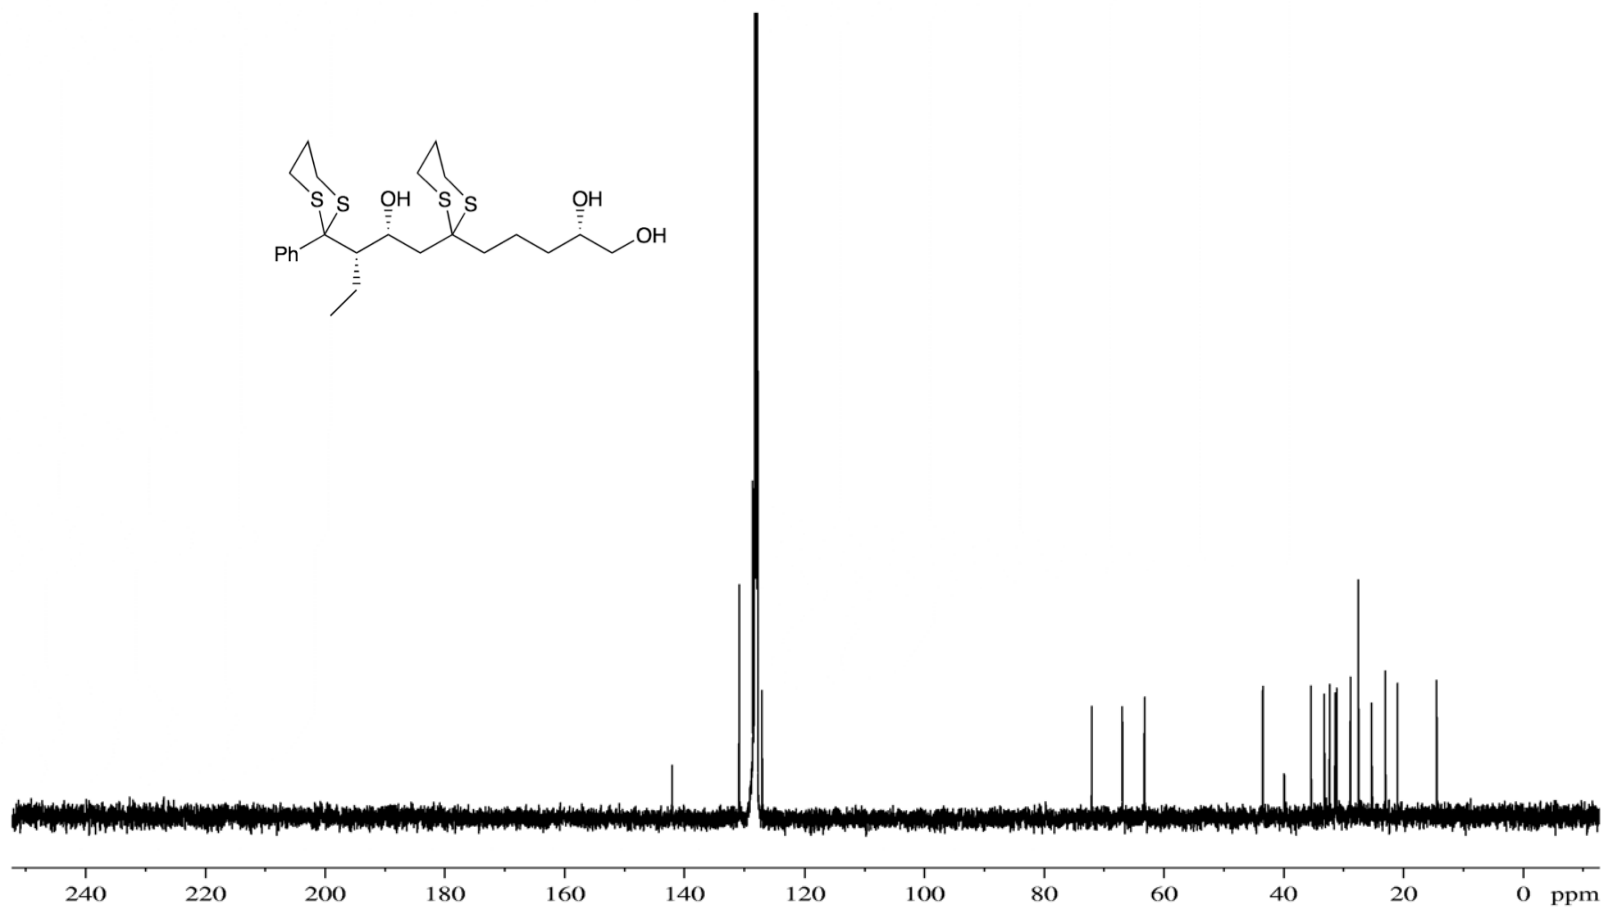The  $^{13}\text{C}$  NMR Spectrum of Compound (+)-**26** in  $\text{C}_6\text{D}_6$

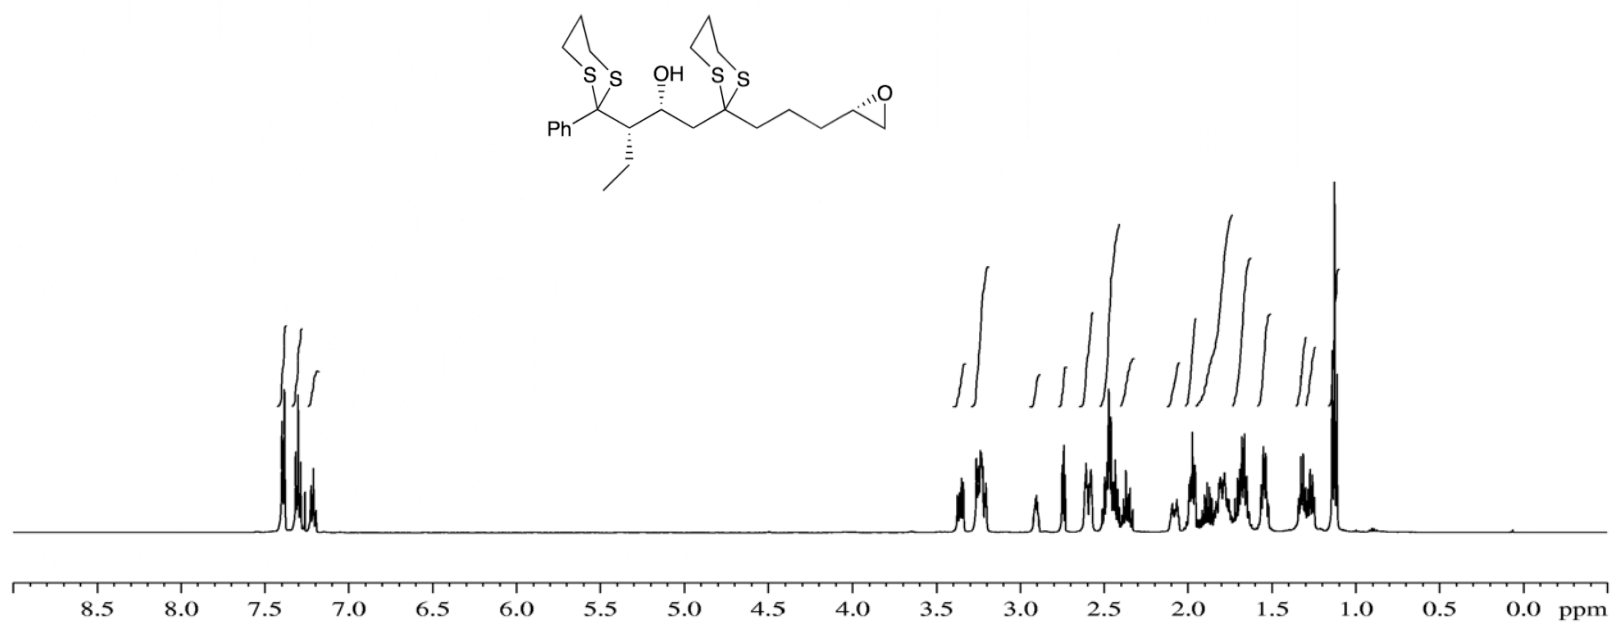

The  $^1\text{H}$  NMR Spectrum of Compound (+)-**S5** in  $\text{CDCl}_3$ .

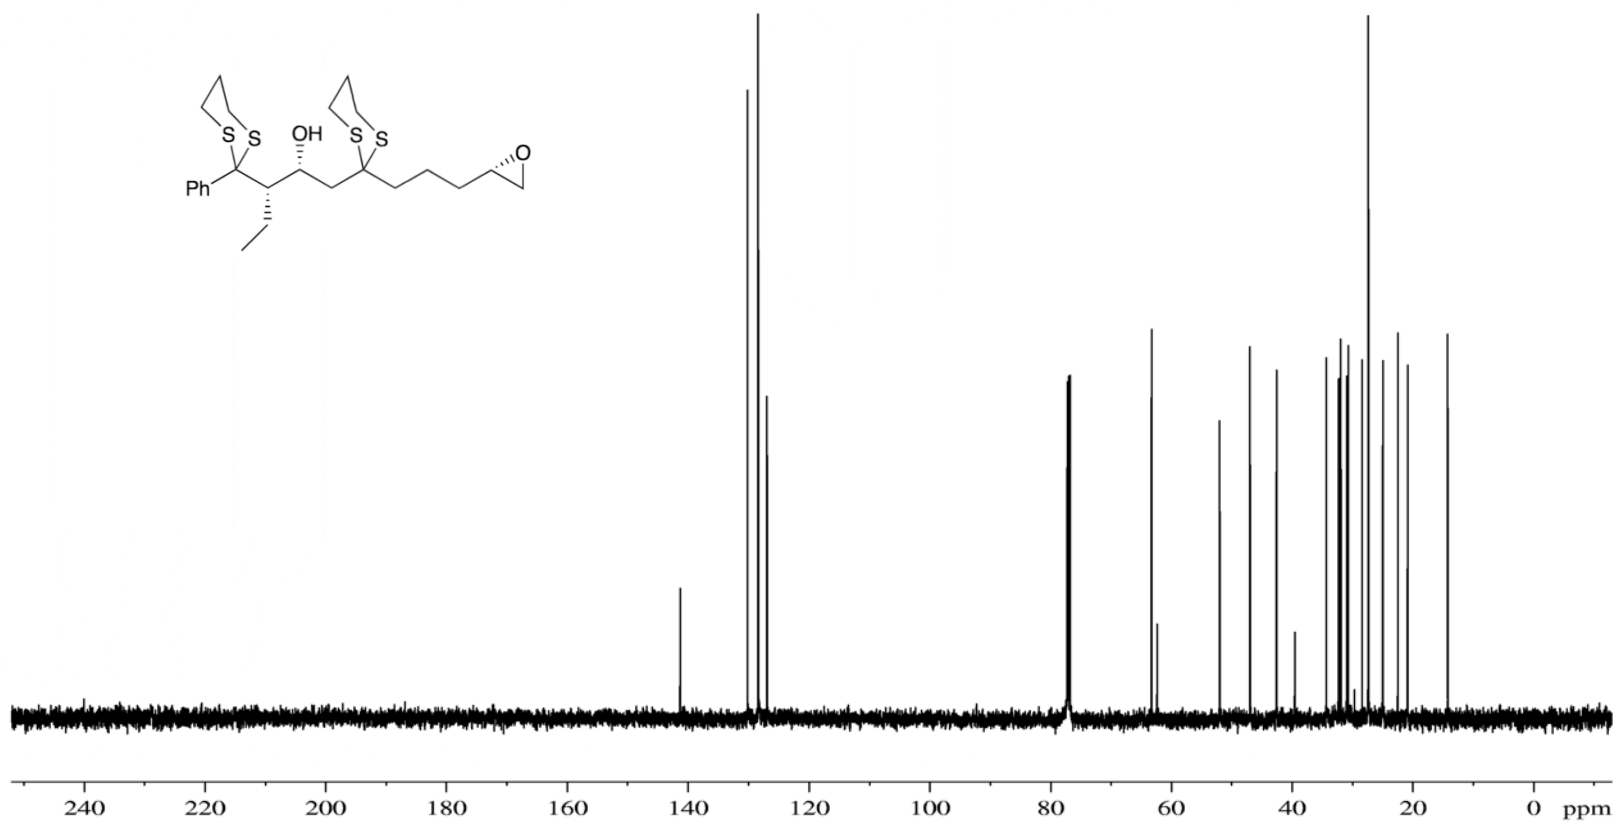

The  $^{13}\text{C}$  NMR Spectrum of Compound (+)-**S5** in  $\text{CDCl}_3$ .



S127

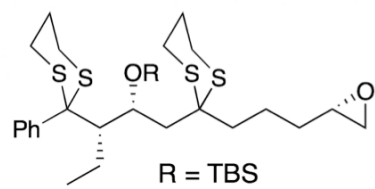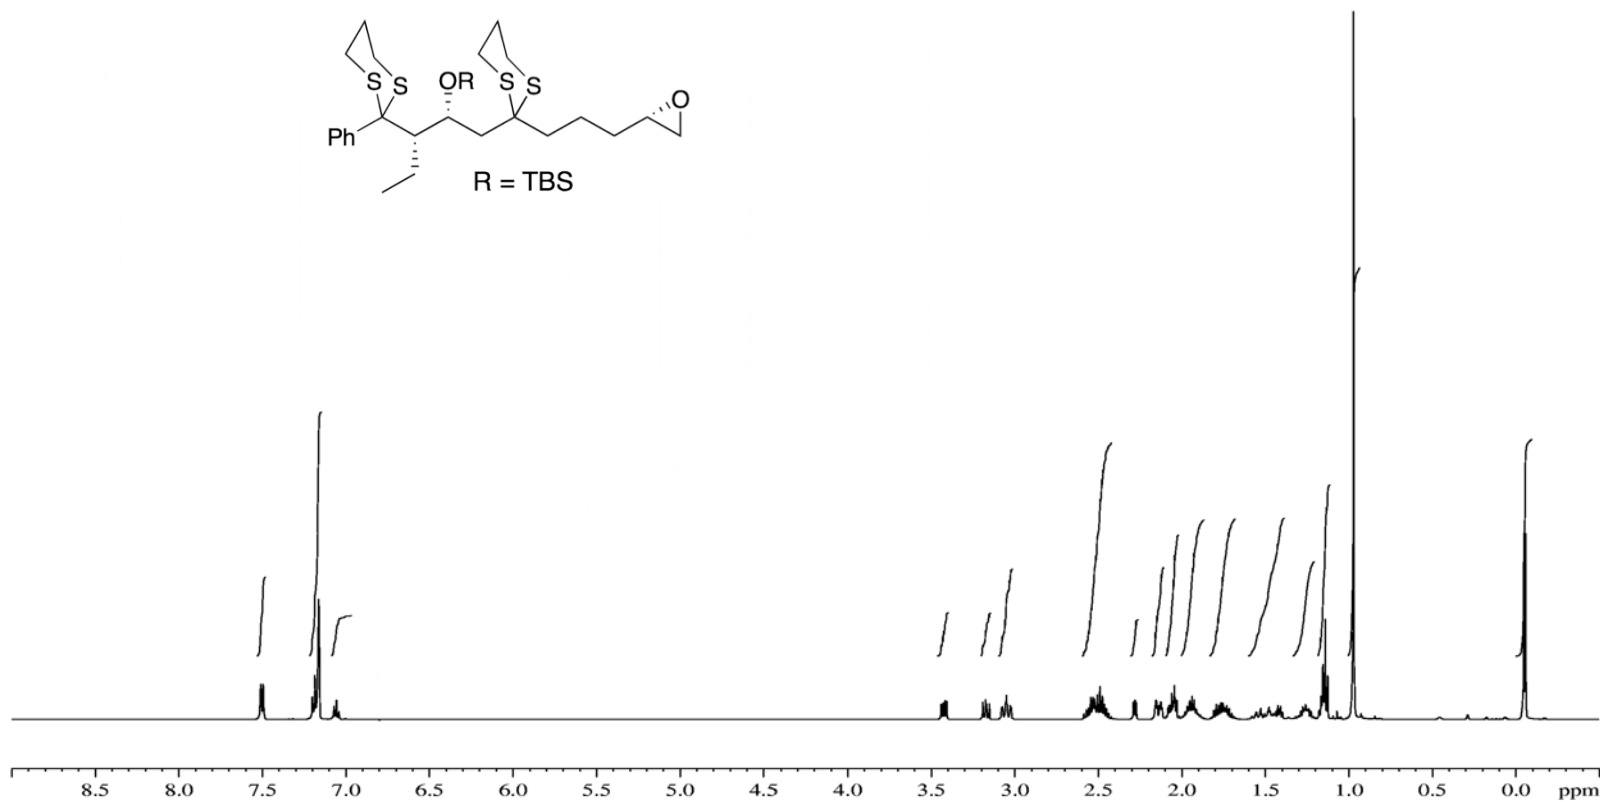

The <sup>1</sup>H NMR Spectrum of Compound (-)-7 in CDCl<sub>3</sub>

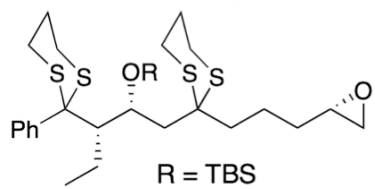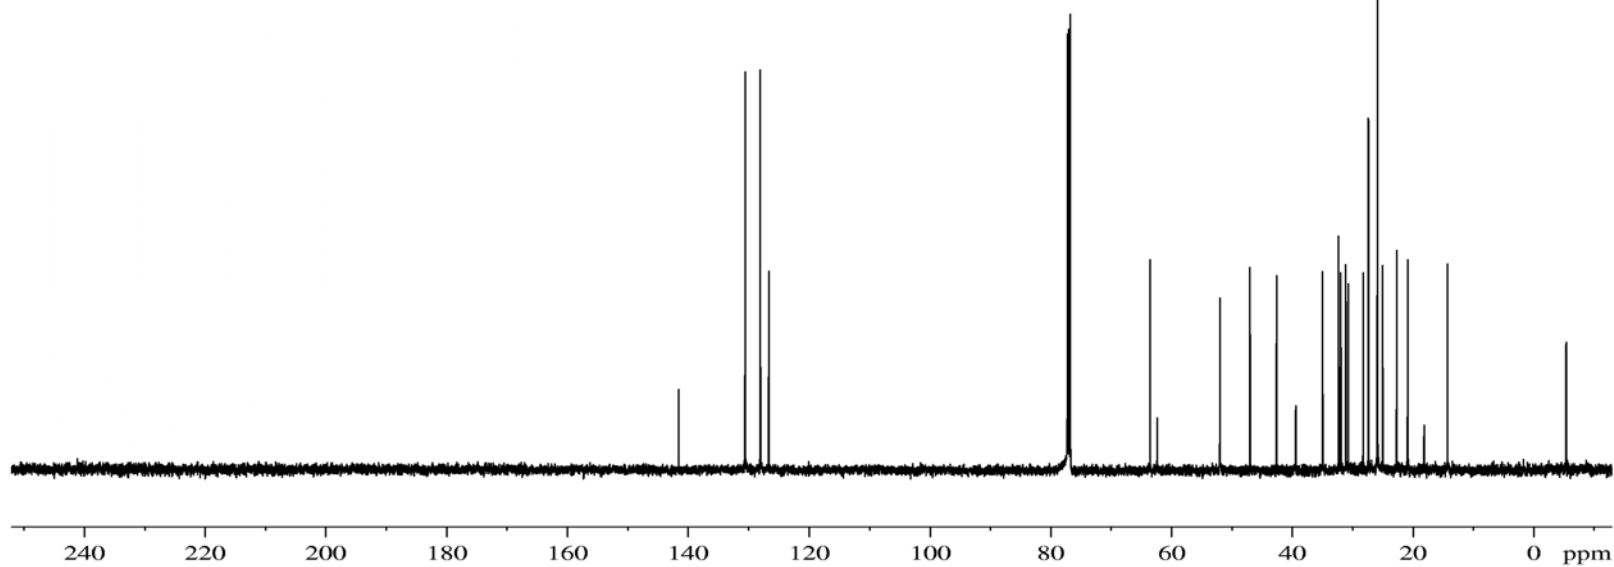

The  $^{13}\text{C}$  NMR Spectrum of Compound (-)-7 in  $\text{CDCl}_3$

S129

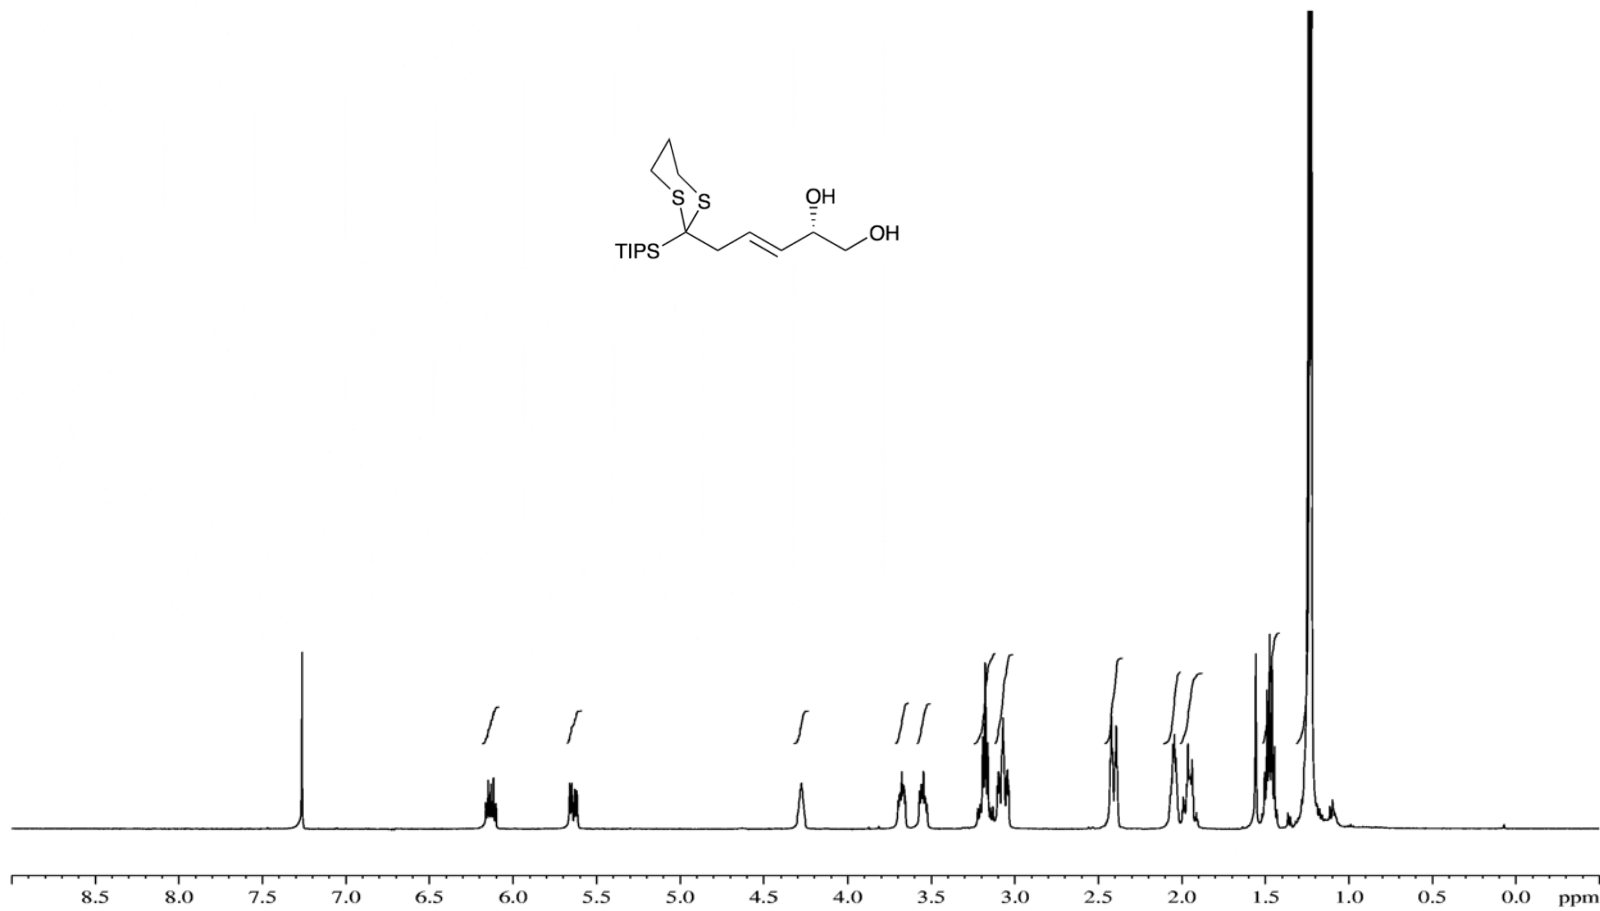

The <sup>1</sup>H NMR Spectrum of Compound (+)-27 in CDCl<sub>3</sub>

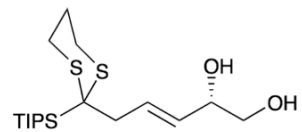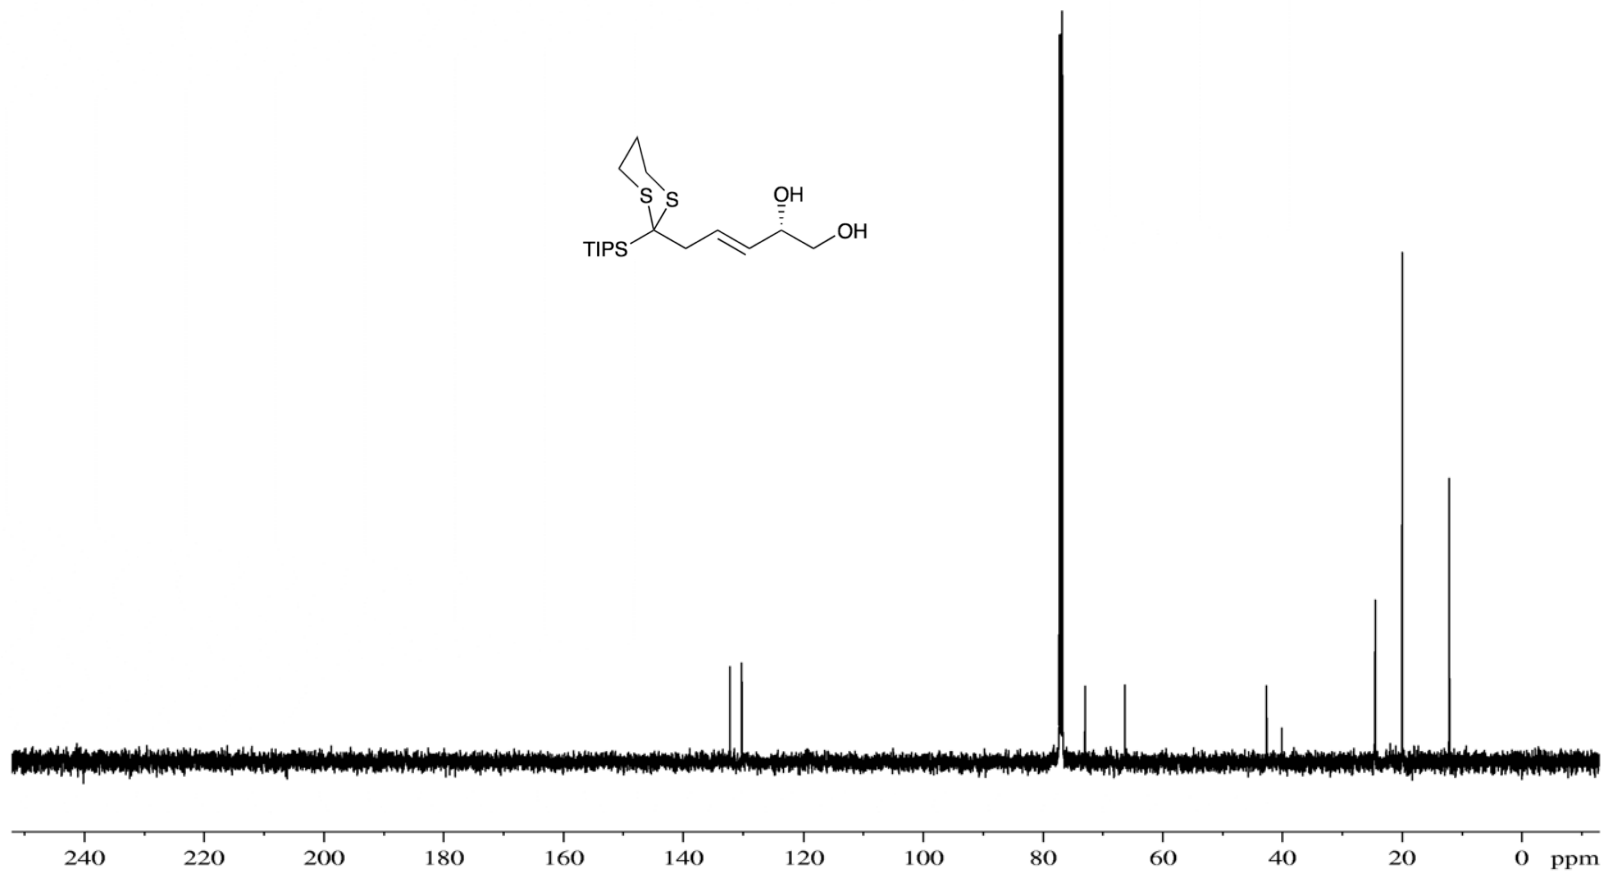

The  $^{13}\text{C}$  NMR Spectrum of Compound (+)-27 in  $\text{CDCl}_3$

S131

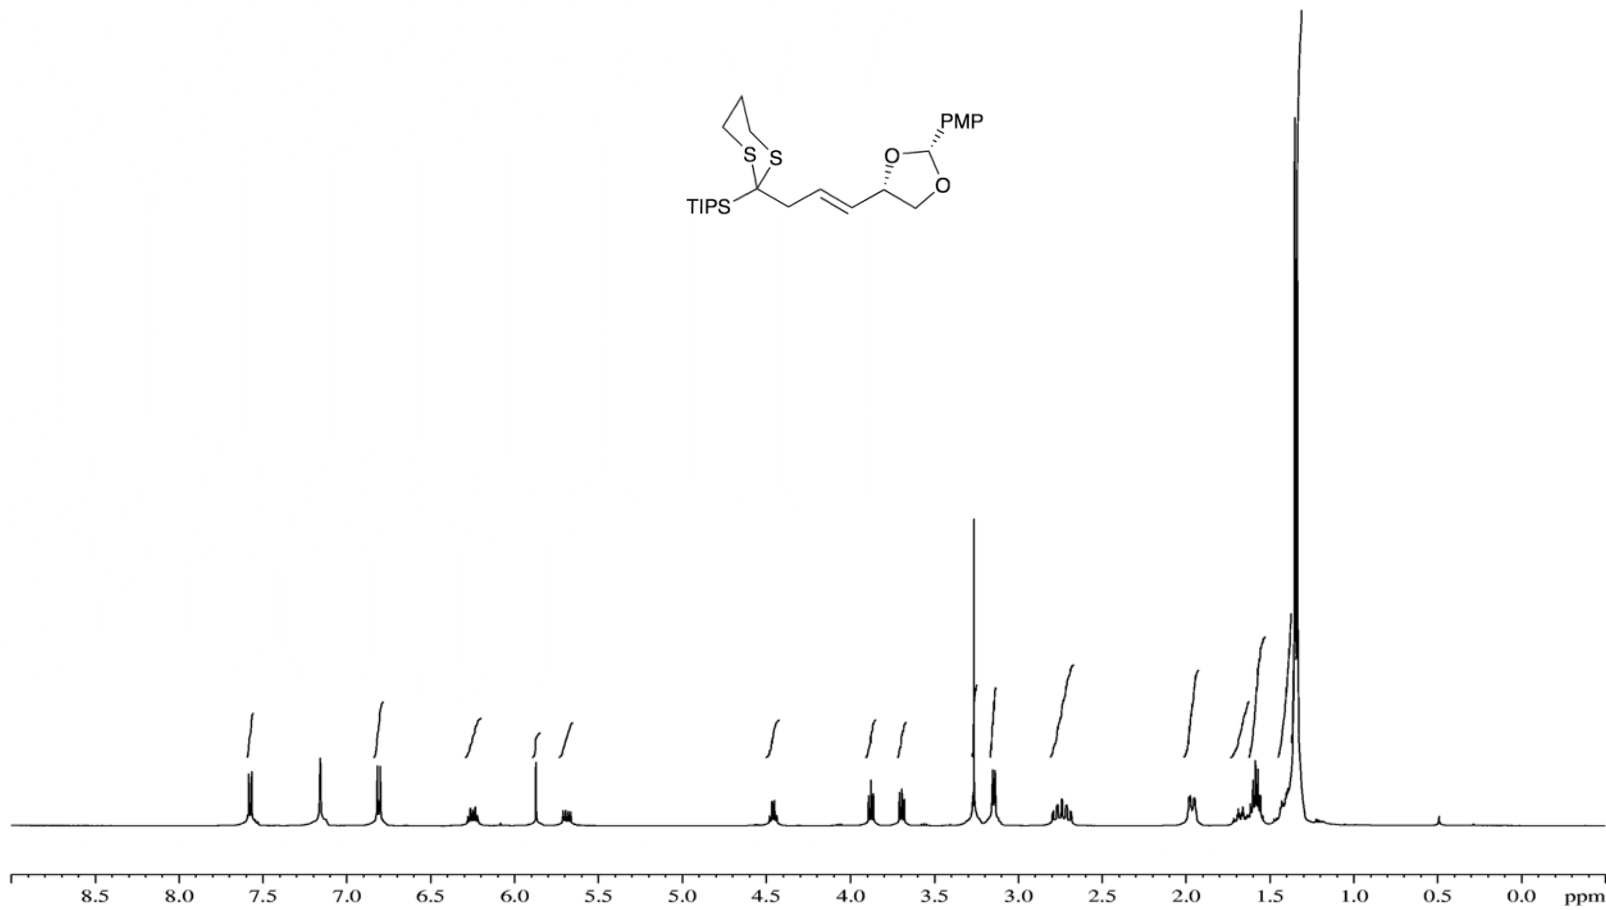

The <sup>1</sup>H NMR Spectrum of Compound (-)-**28** in C<sub>6</sub>D<sub>6</sub>

S132

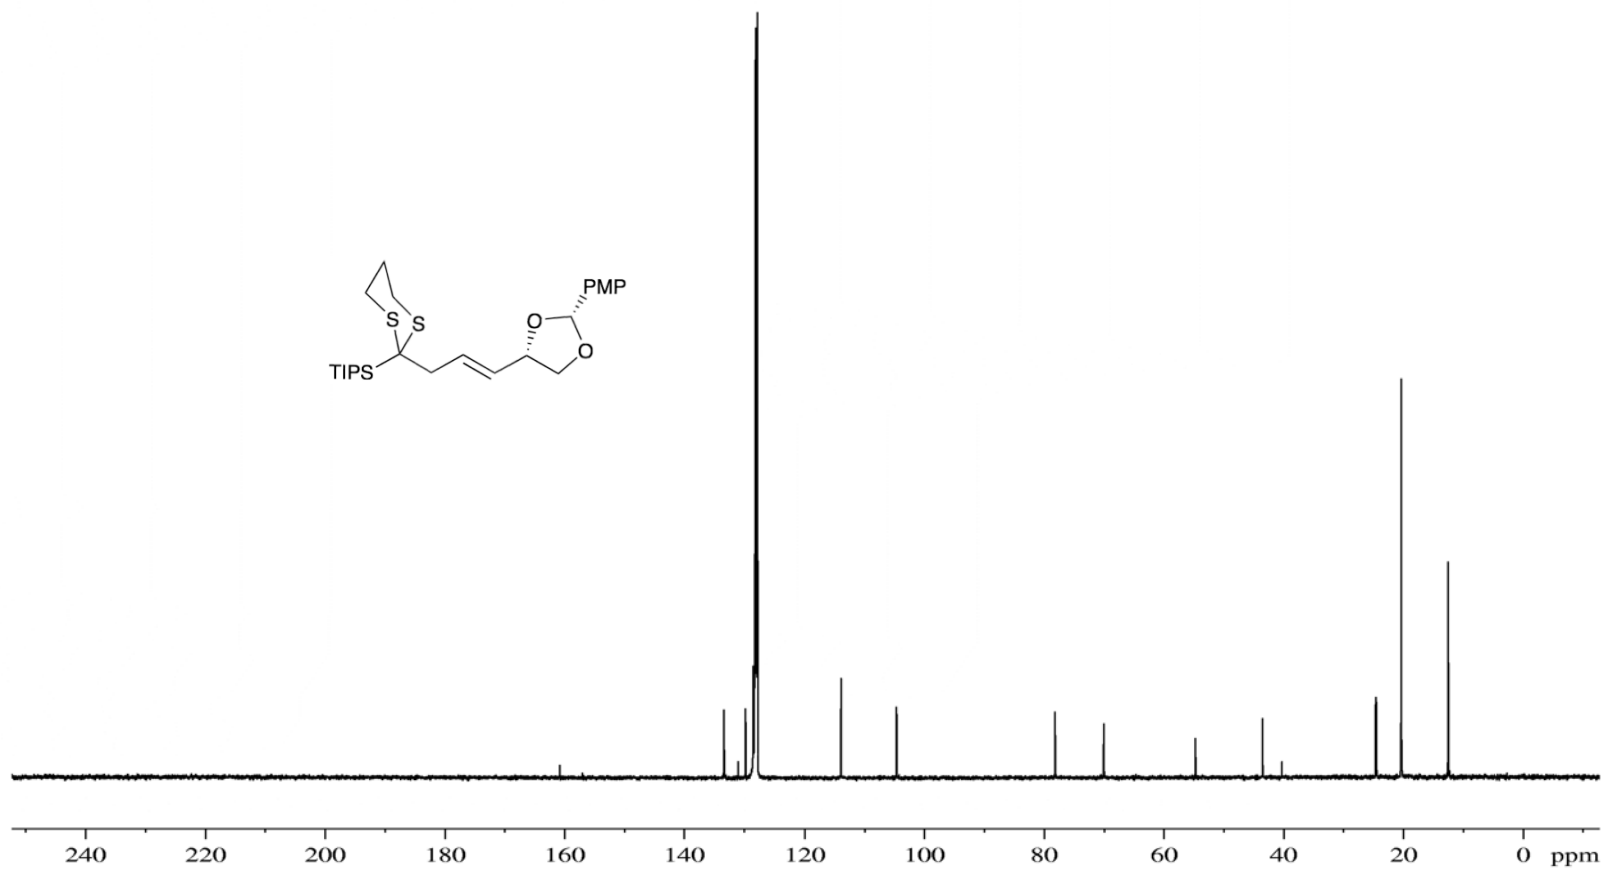

The  $^{13}\text{C}$  NMR Spectrum of Compound (-)-**28** in  $\text{C}_6\text{D}_6$

S133

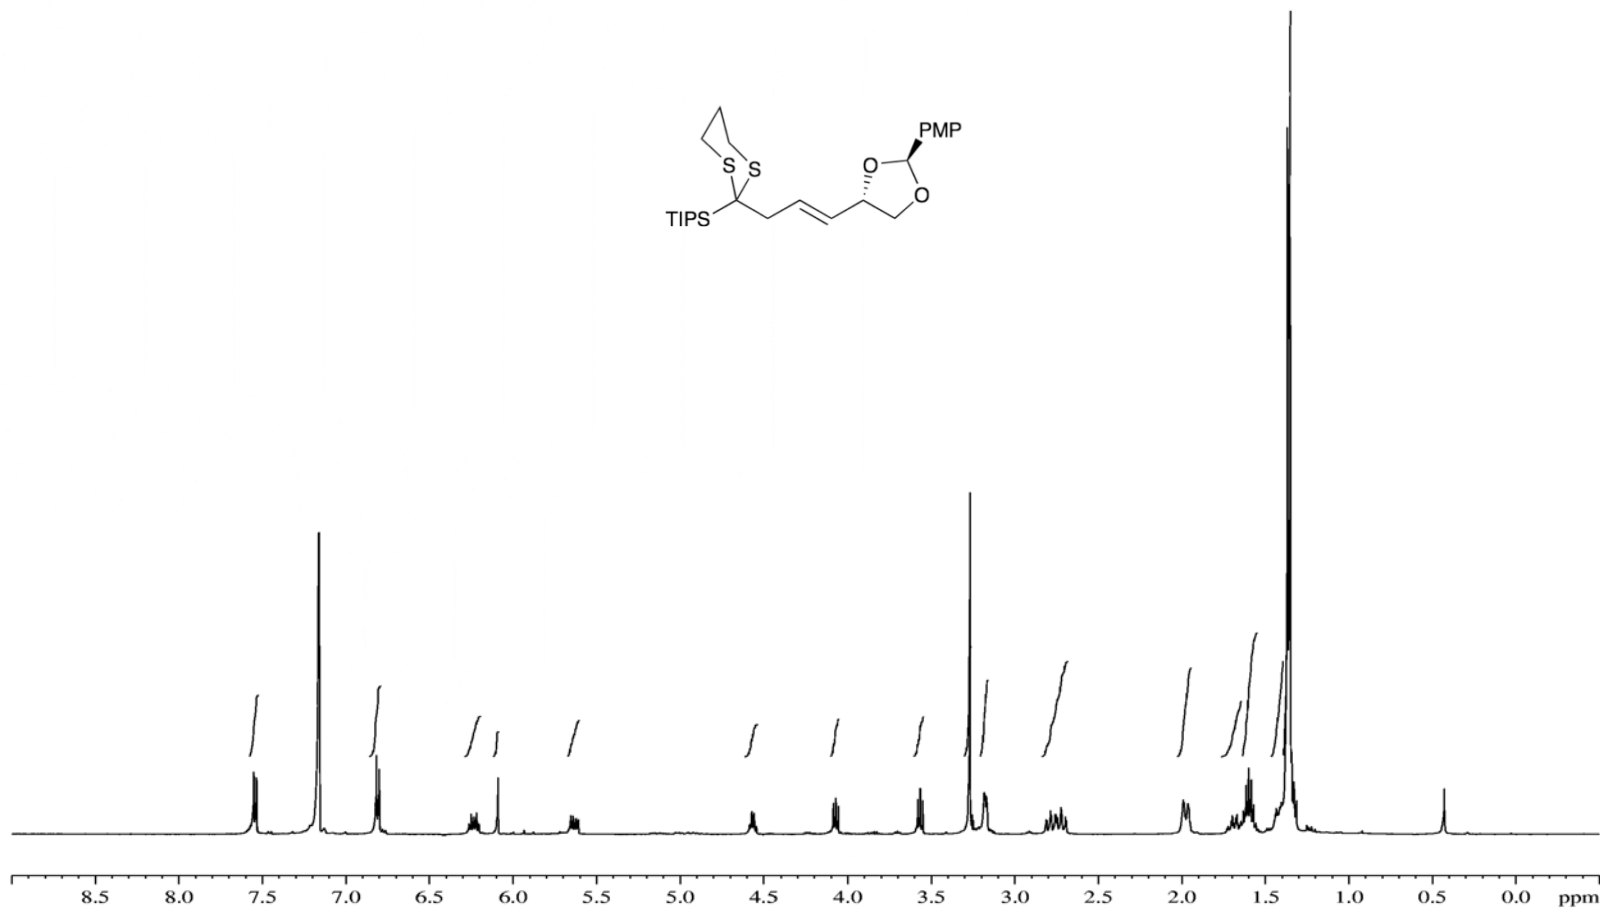

The  $^1\text{H}$  NMR Spectrum of Compound (+)-**29** in  $\text{C}_6\text{D}_6$

S134

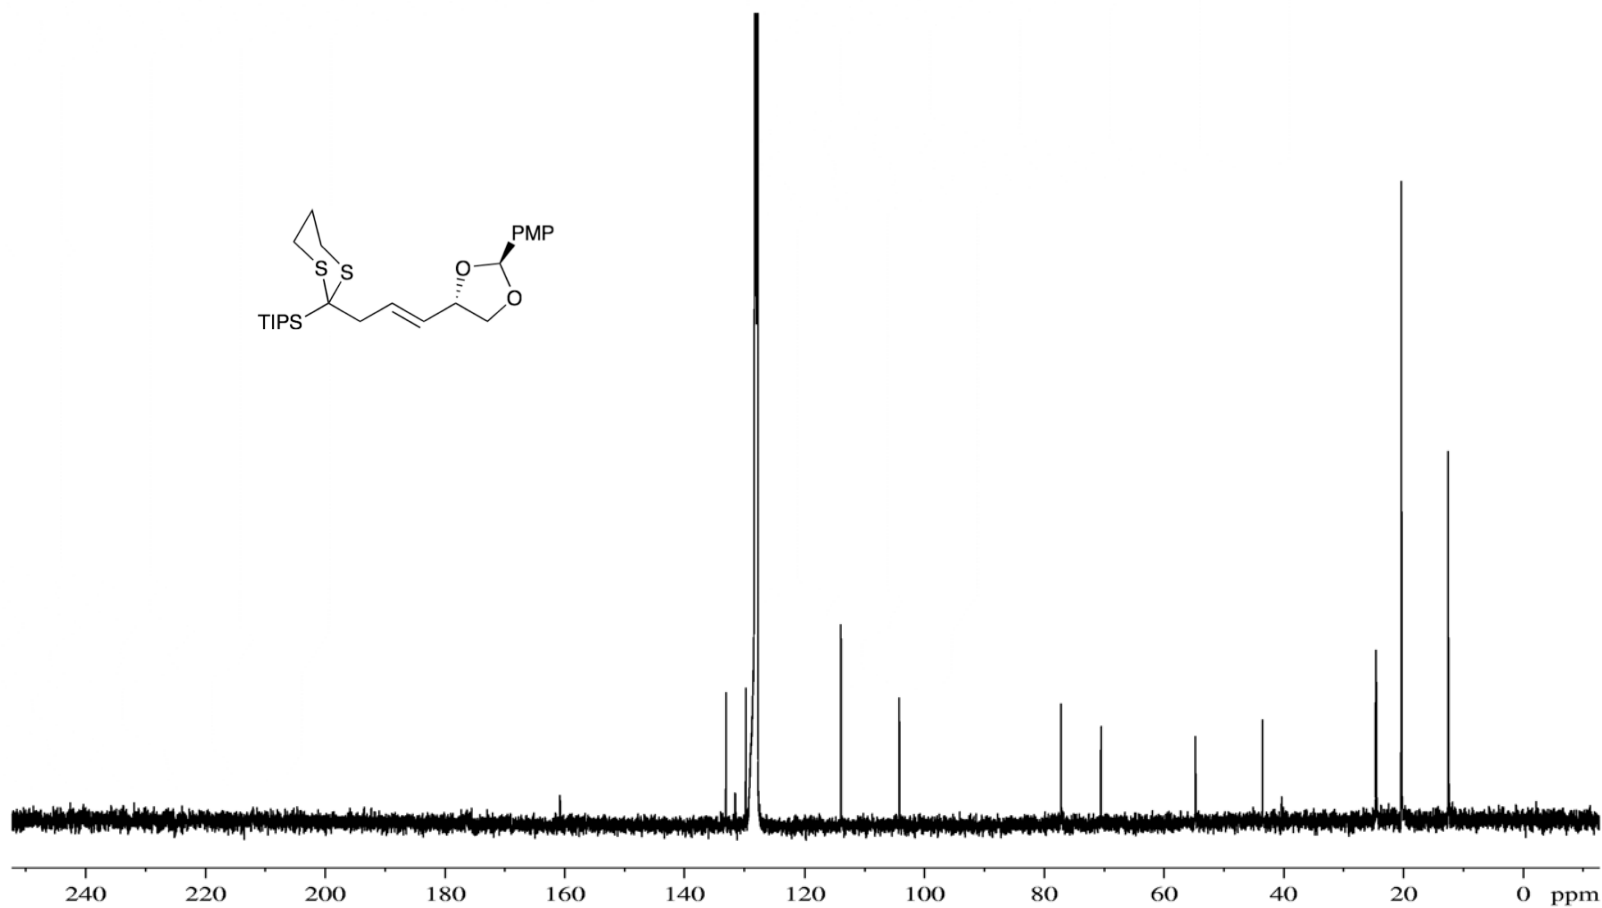

The  $^{13}\text{C}$  NMR Spectrum of Compound (+)-**29** in  $\text{C}_6\text{D}_6$



S135

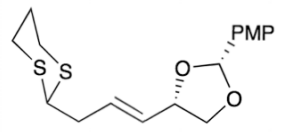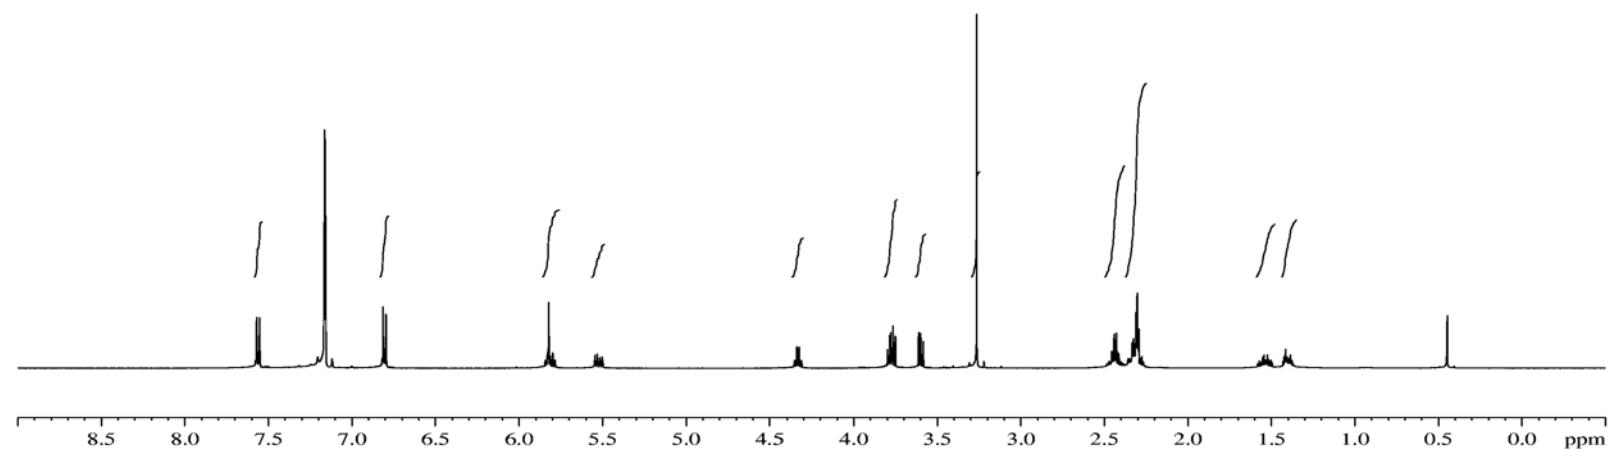

The  $^1\text{H}$  NMR Spectrum of Compound (-)-S6 in  $\text{C}_6\text{D}_6$

S136

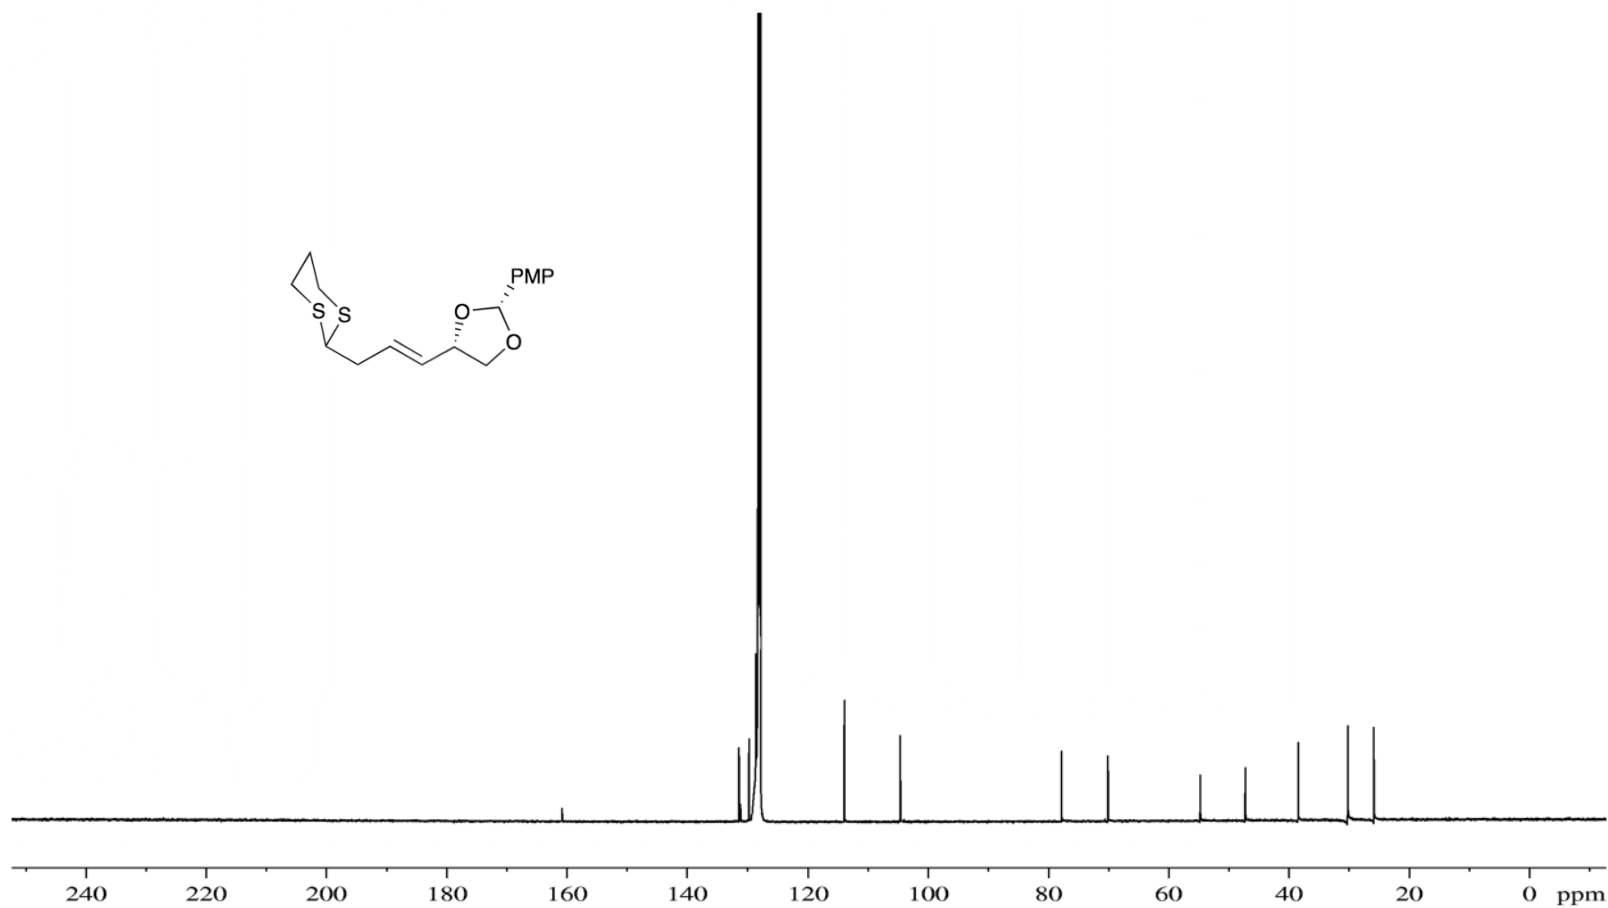

The  $^{13}\text{C}$  NMR Spectrum of Compound (-)-**S6** in  $\text{C}_6\text{D}_6$



S138

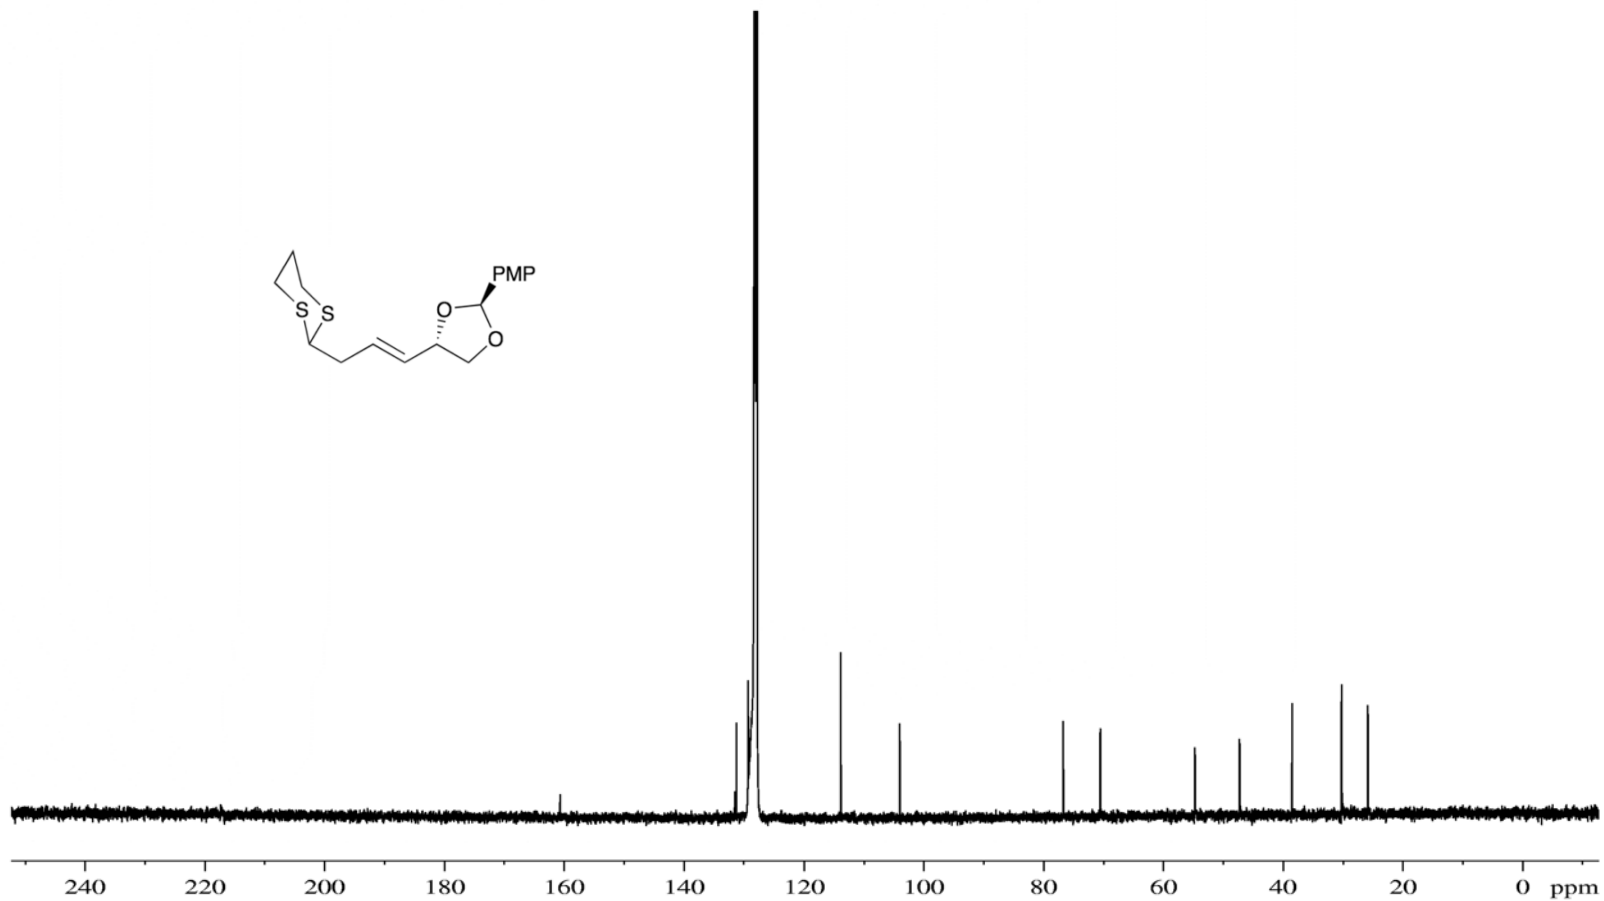

The  $^{13}\text{C}$  NMR Spectrum of Compound (+)-**S7** in  $\text{C}_6\text{D}_6$

S139

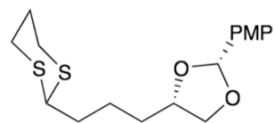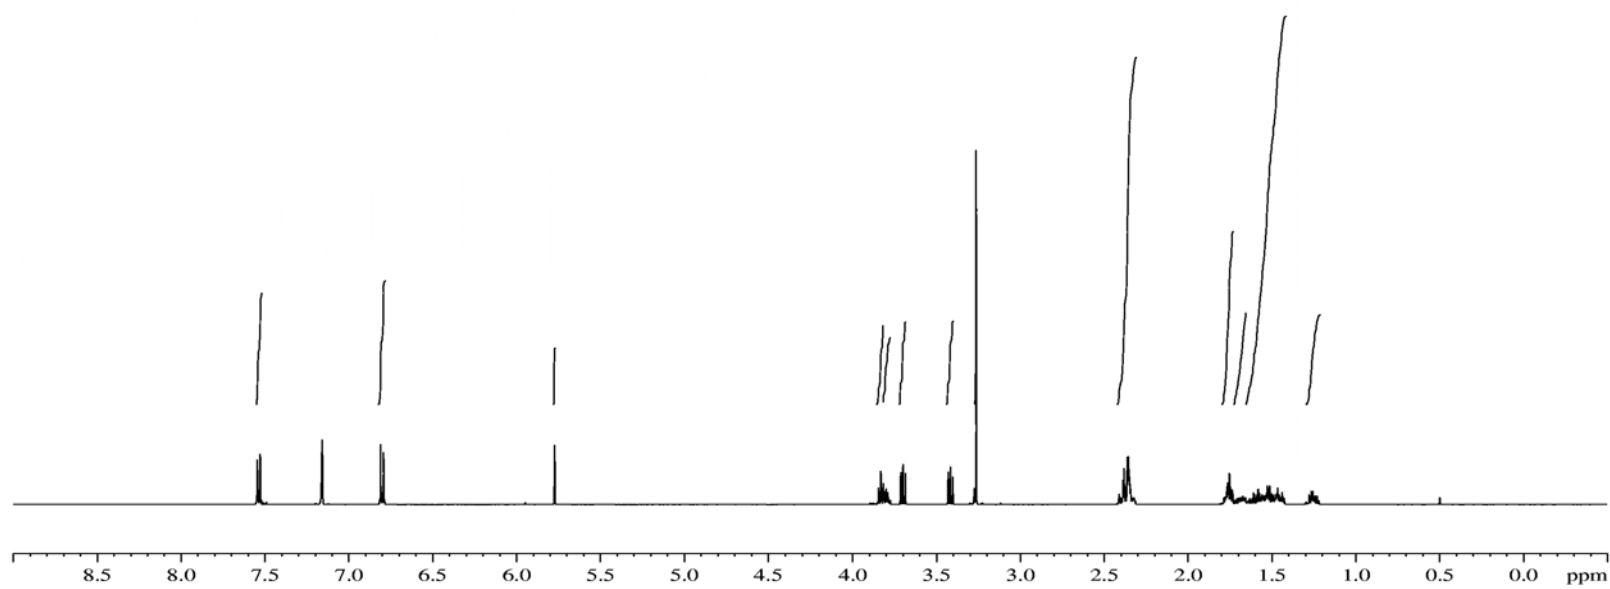

The  $^1\text{H}$  NMR Spectrum of Compound (-)-**30** in  $\text{C}_6\text{D}_6$

S140

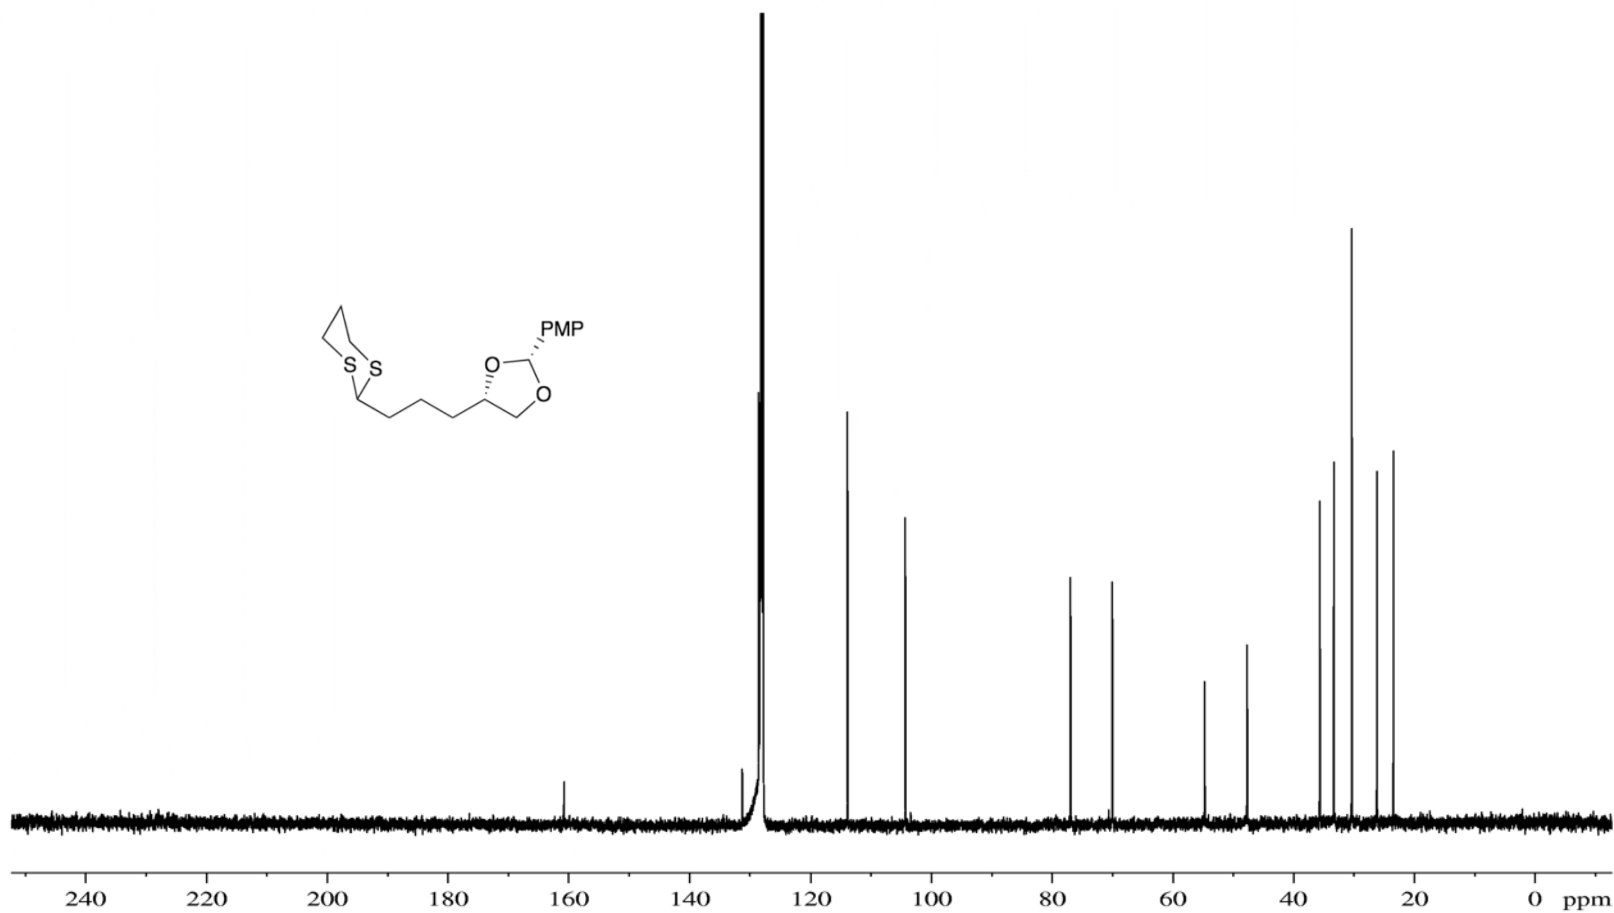

The  $^{13}\text{C}$  NMR Spectrum of Compound (-)-**30** in  $\text{C}_6\text{D}_6$

S141

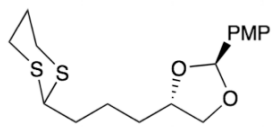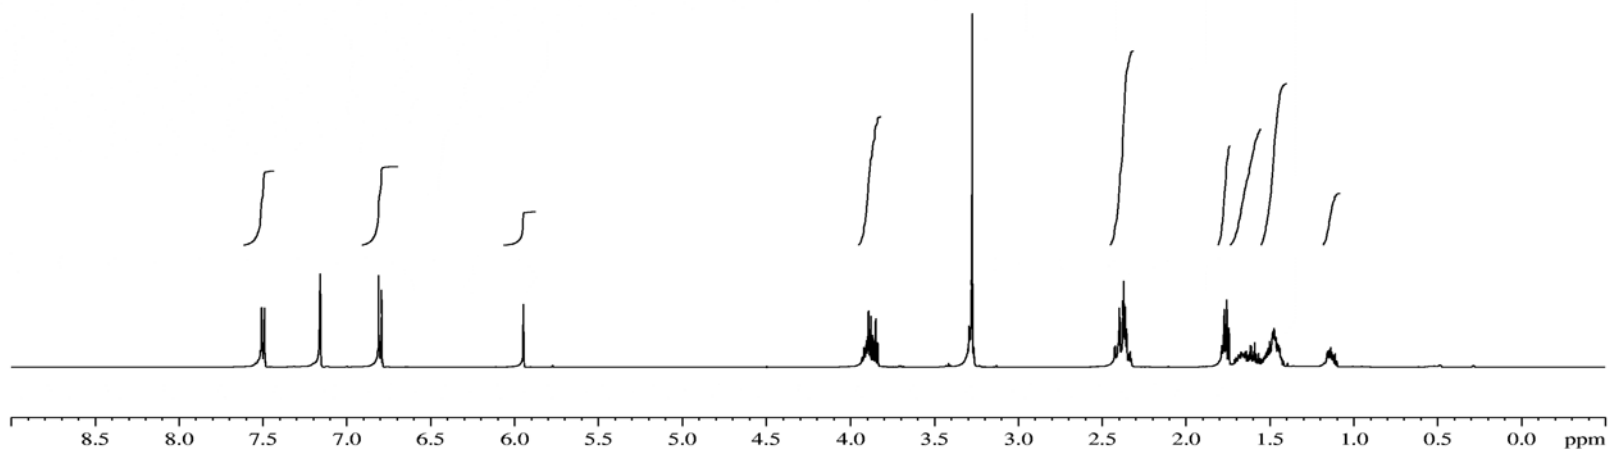

The  $^1\text{H}$  NMR Spectrum of Compound (+)-S8 in  $\text{C}_6\text{D}_6$

S142

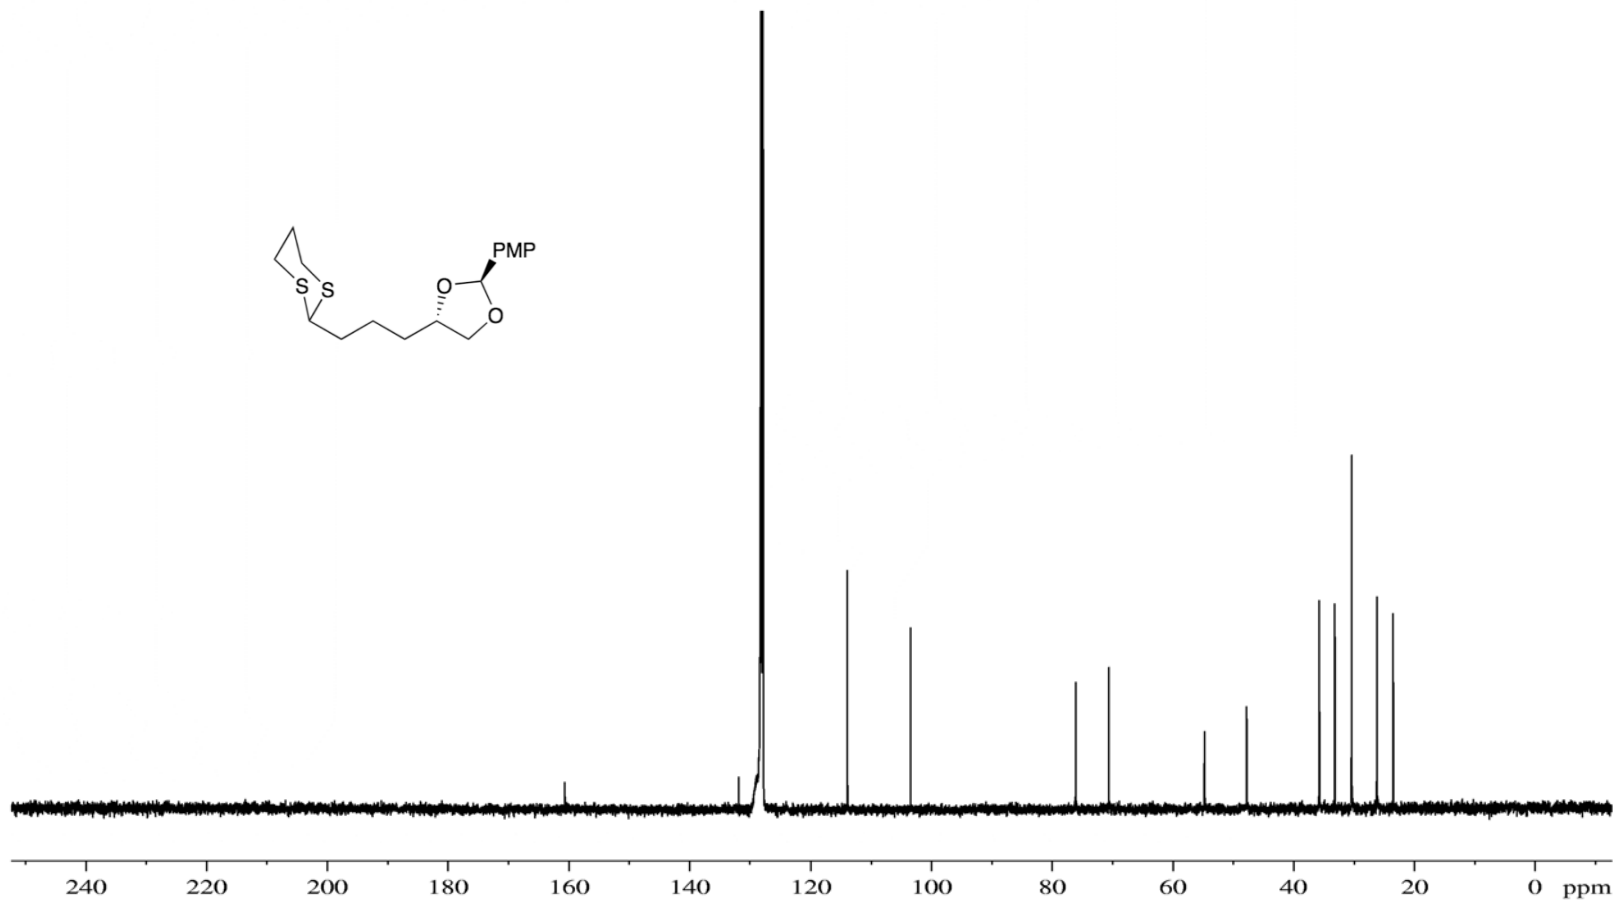

The  $^{13}\text{C}$  NMR Spectrum of Compound (+)-**S8** in  $\text{C}_6\text{D}_6$



S143

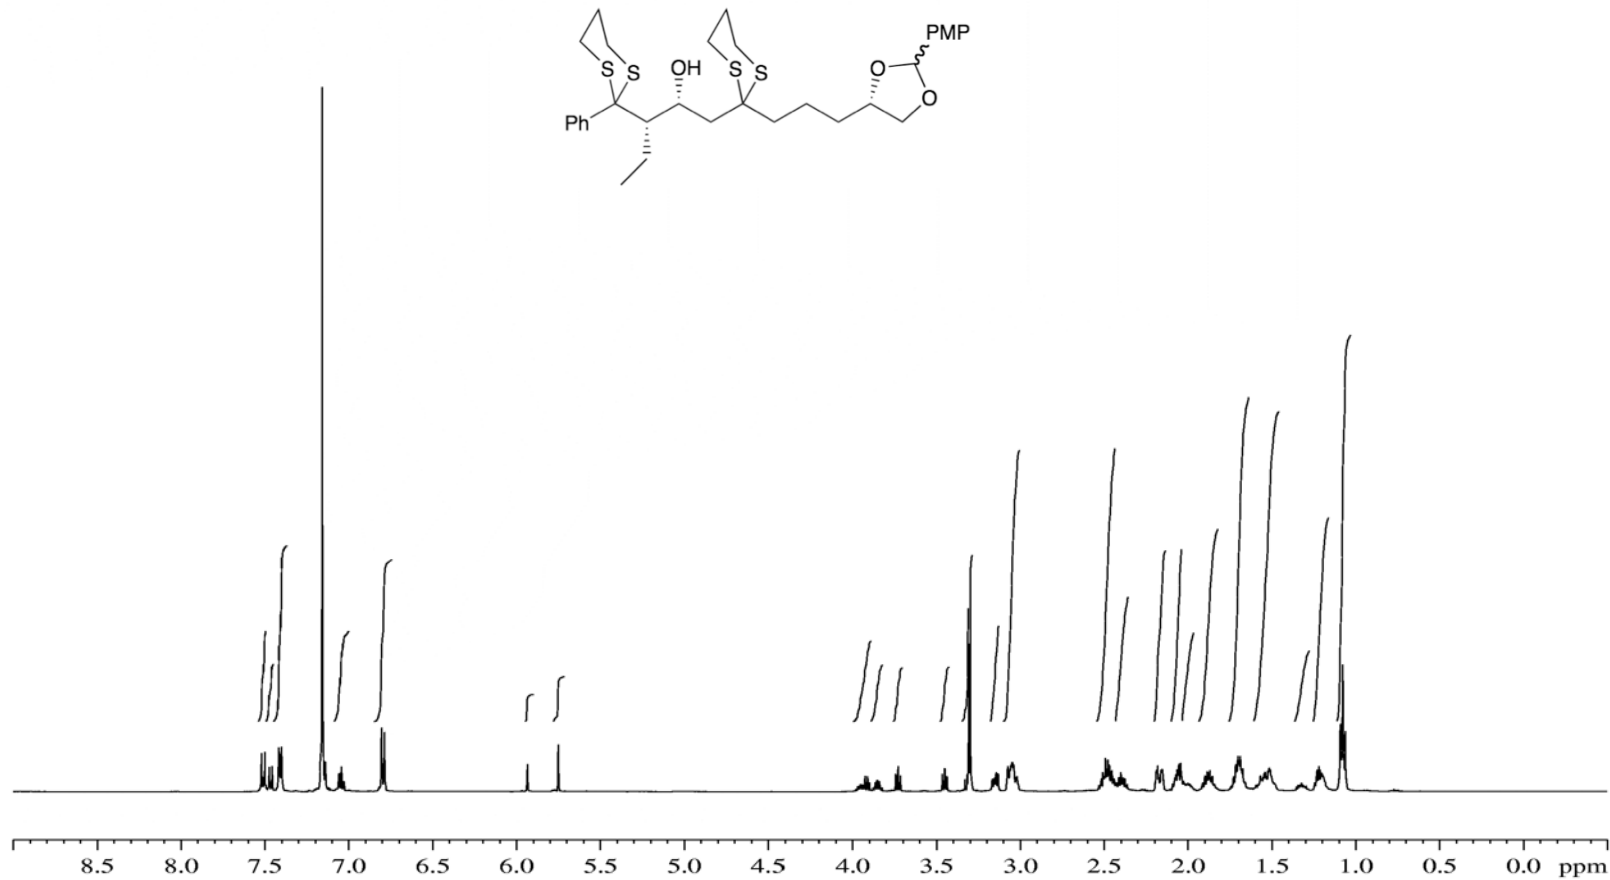

The <sup>1</sup>H NMR Spectrum of Compound **31** in C<sub>6</sub>D<sub>6</sub>

S144

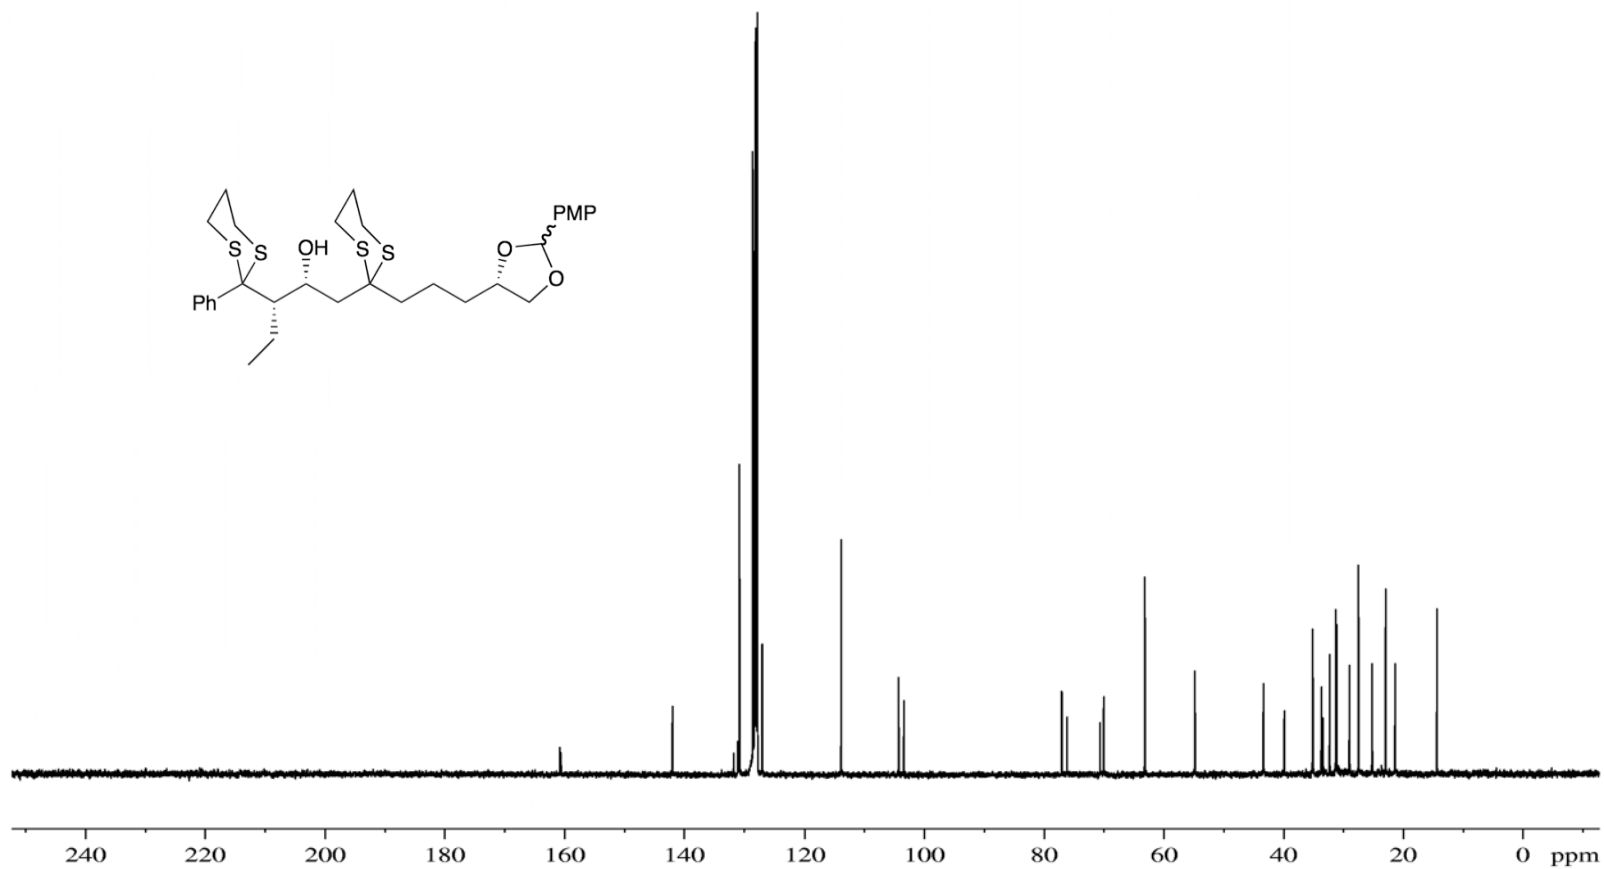

The  $^{13}\text{C}$  NMR Spectrum of Compound **31** in  $\text{C}_6\text{D}_6$

S145

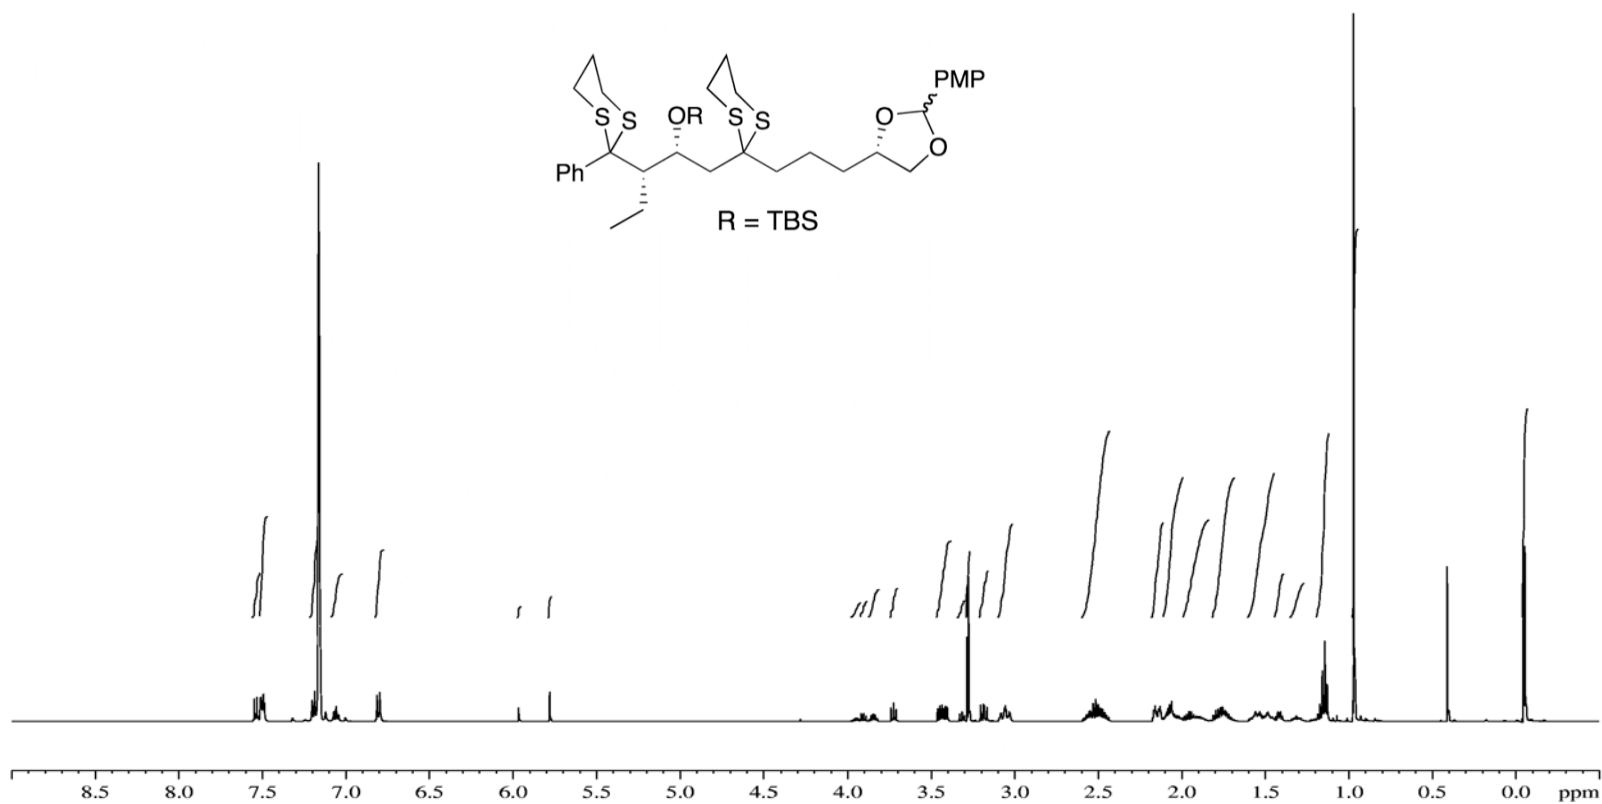

The <sup>1</sup>H NMR Spectrum of Compound **S9** in C<sub>6</sub>D<sub>6</sub>

S146

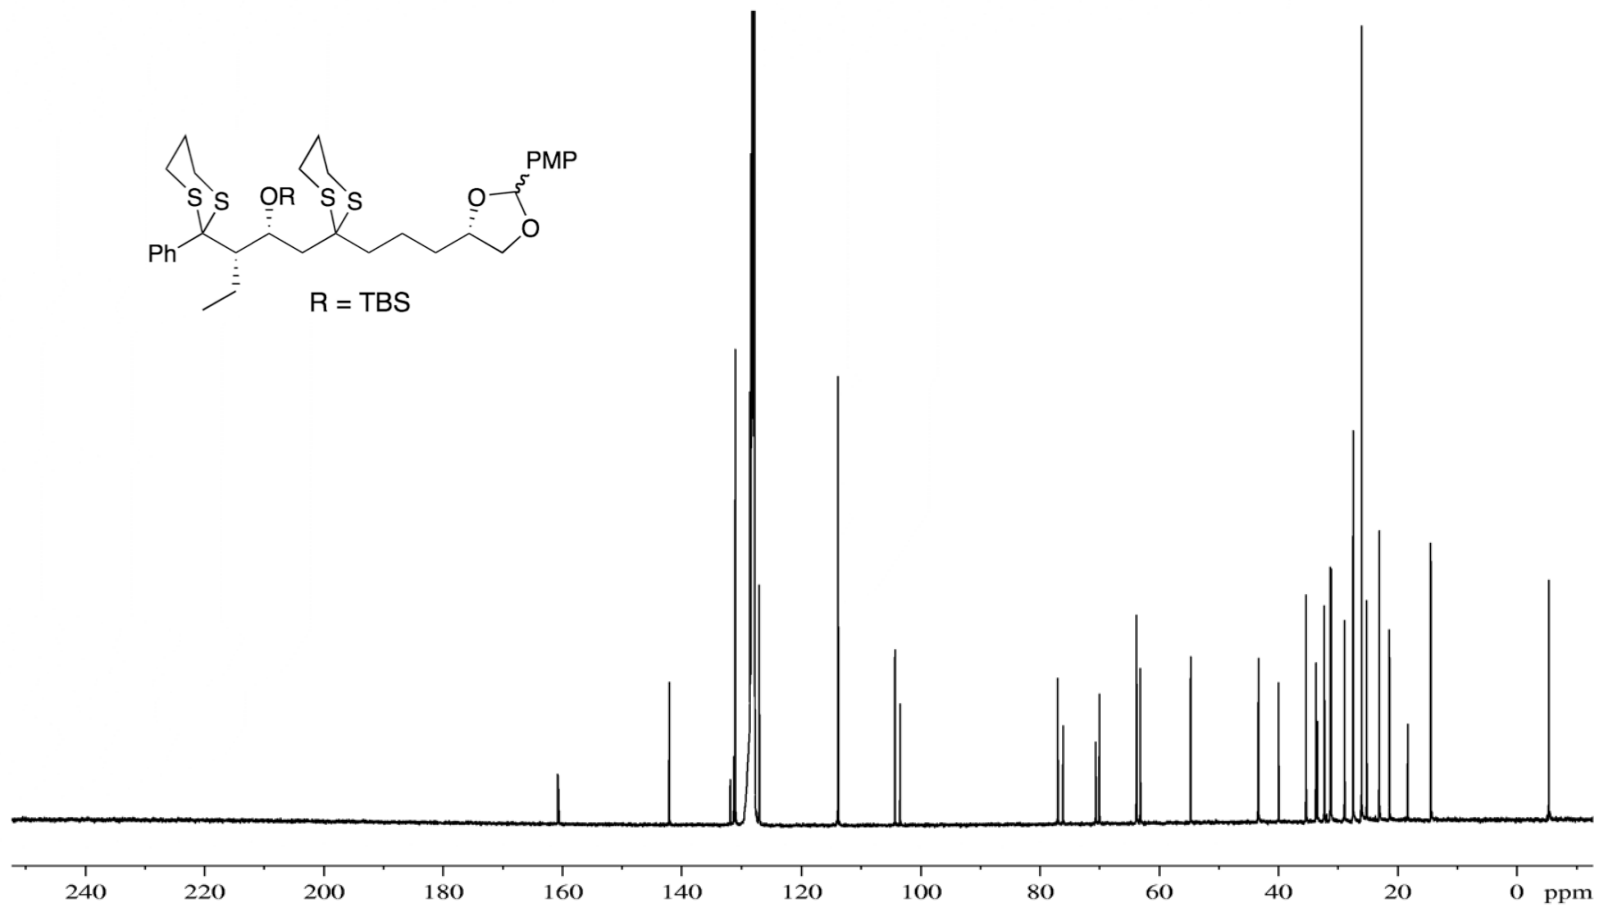

The  $^{13}\text{C}$  NMR Spectrum of Compound **S9** in  $\text{C}_6\text{D}_6$

S147

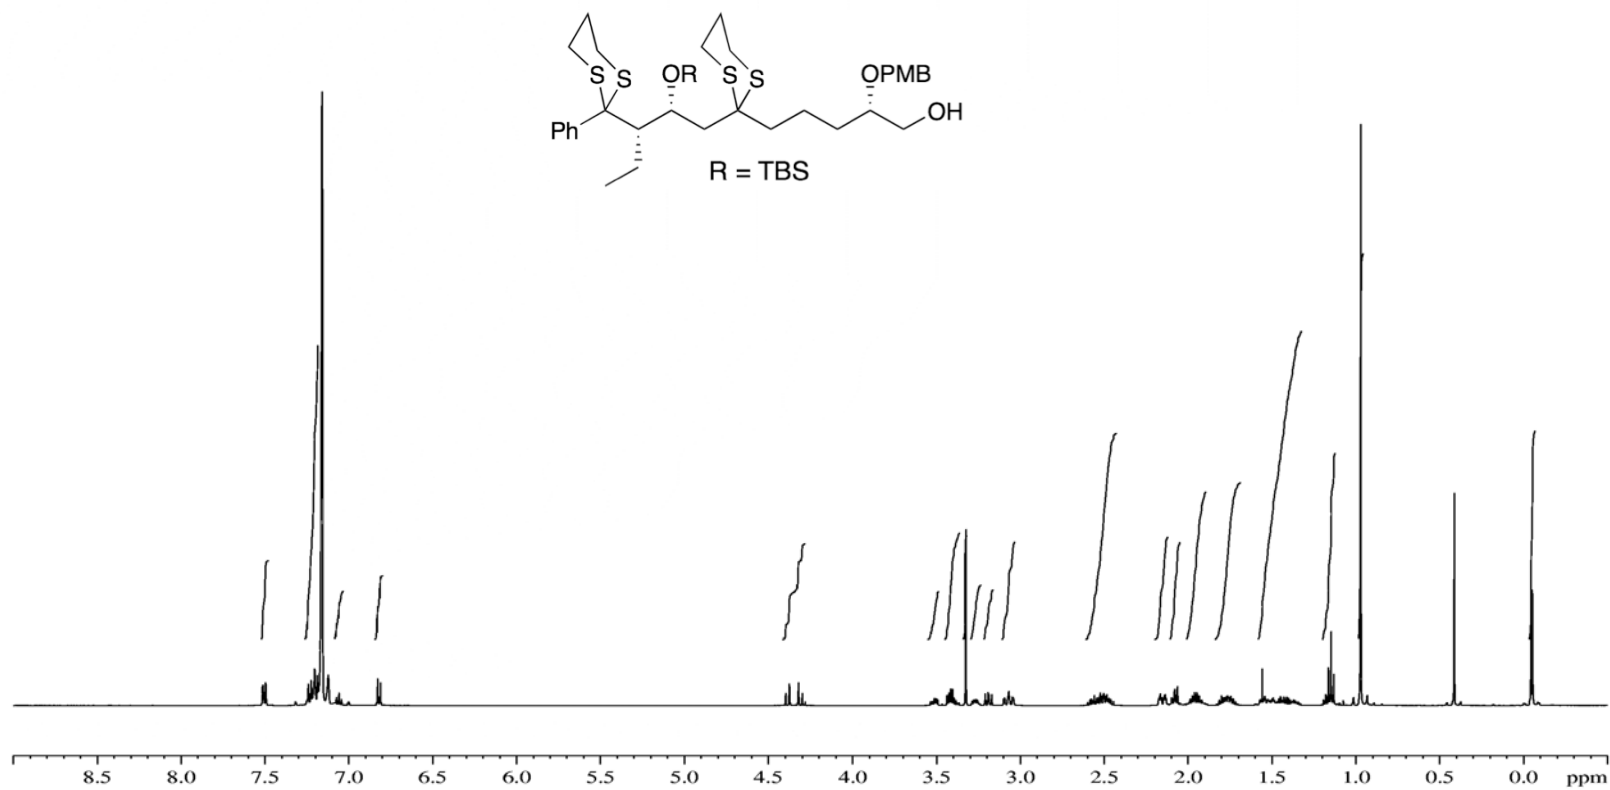

The <sup>1</sup>H NMR Spectrum of Compound (-)-**32** in C<sub>6</sub>D<sub>6</sub>

S148

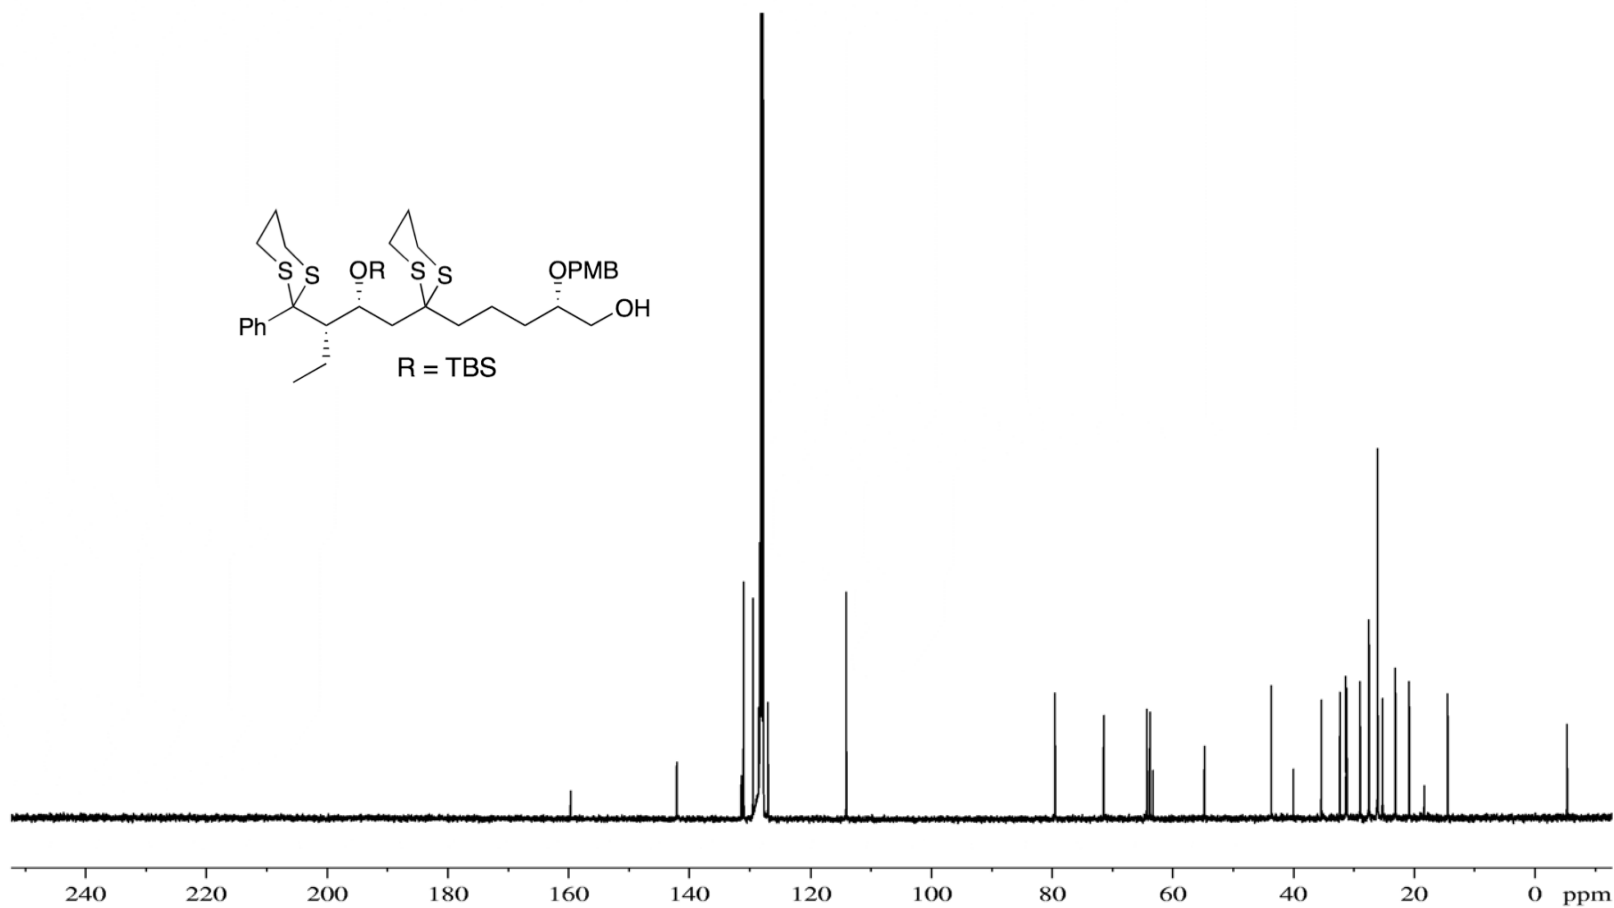

The  $^{13}\text{C}$  NMR Spectrum of Compound (-)-**32** in  $\text{C}_6\text{D}_6$

S149

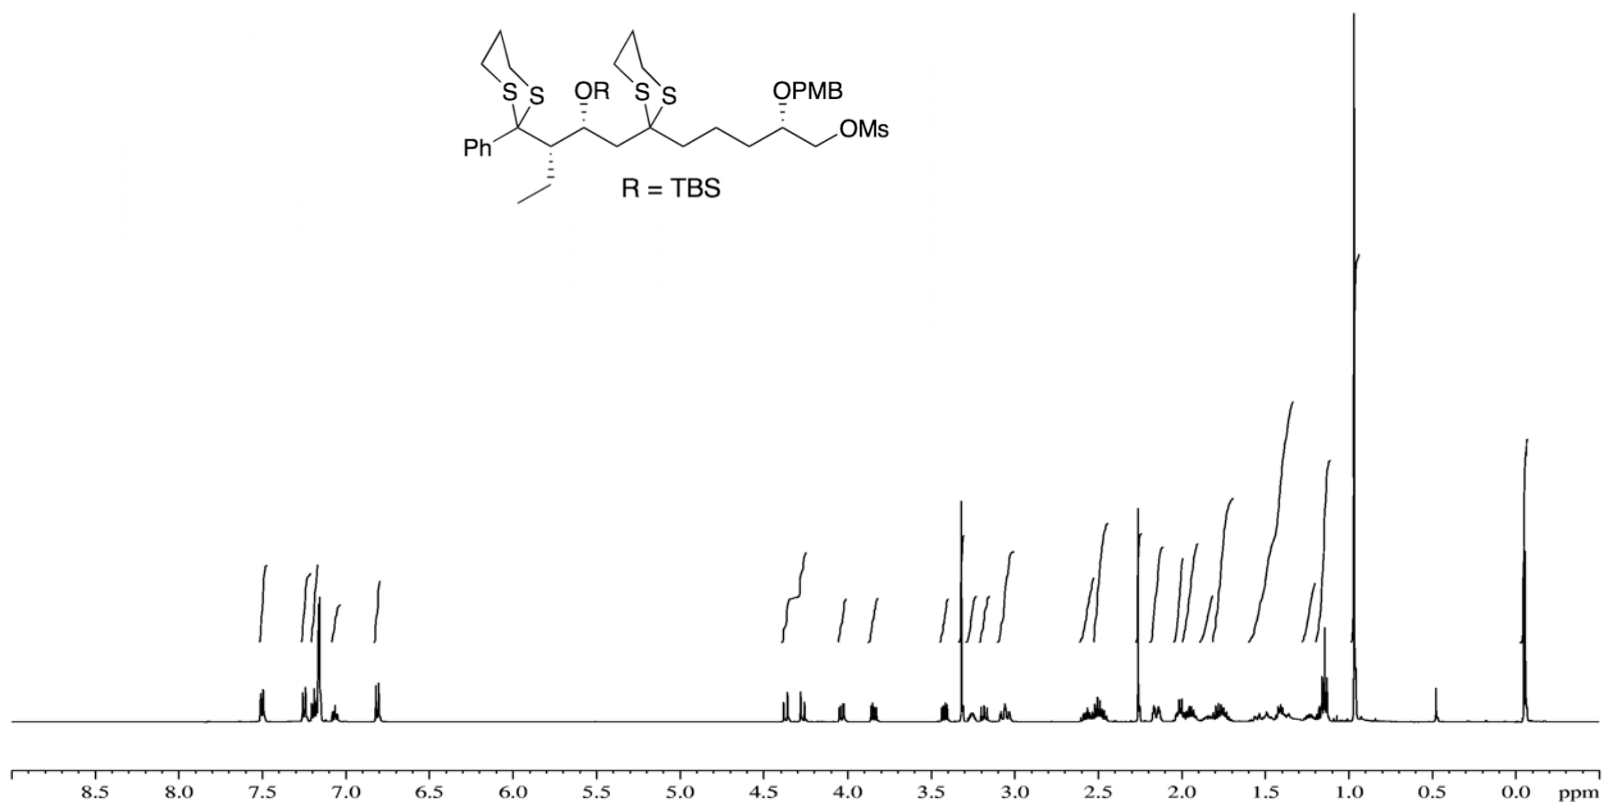

The  $^1\text{H}$  NMR Spectrum of Compound **(-)-S10** in  $\text{C}_6\text{D}_6$

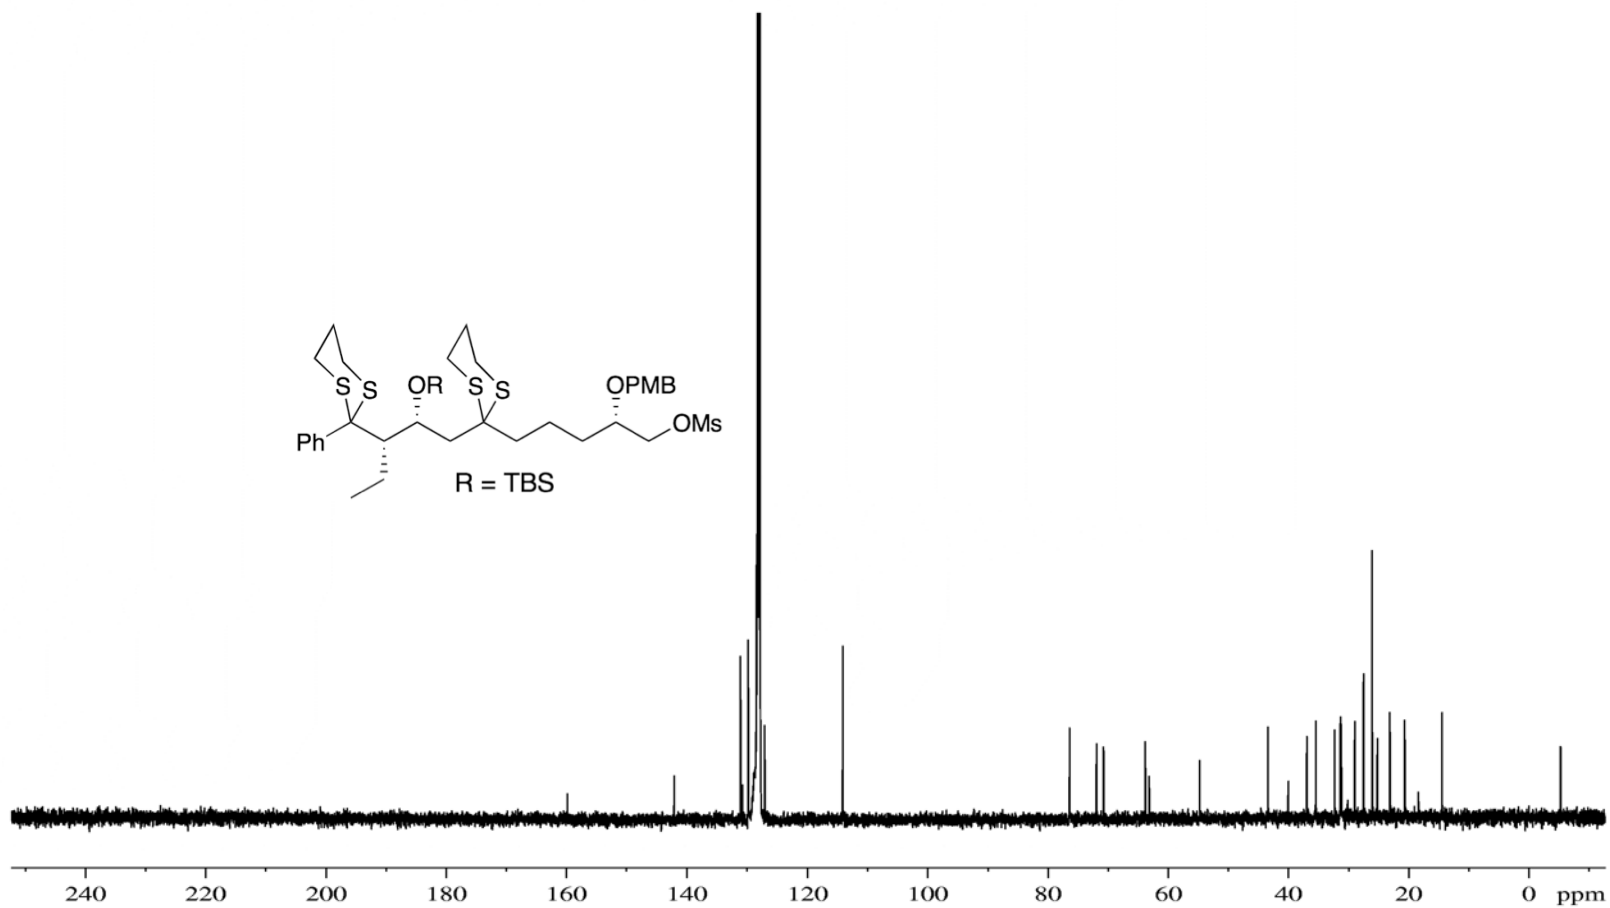

The  $^{13}\text{C}$  NMR Spectrum of Compound (-)-**S10** in  $\text{C}_6\text{D}_6$



S151

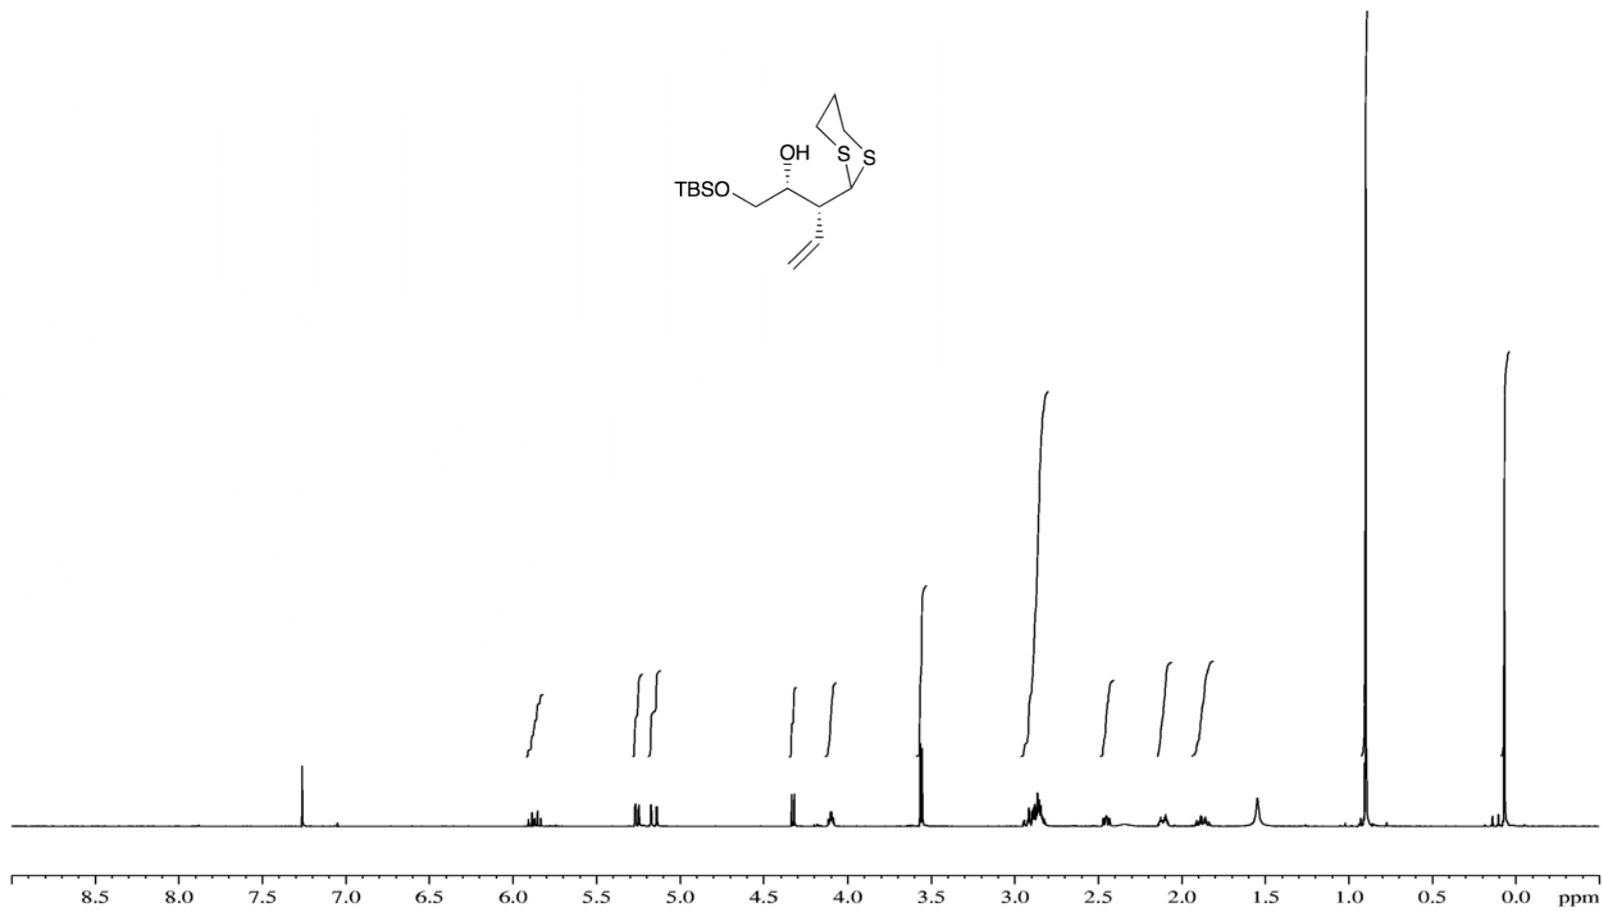

The <sup>1</sup>H NMR Spectrum of Compound mono-protected (-)-**12** in CDCl<sub>3</sub>

S152

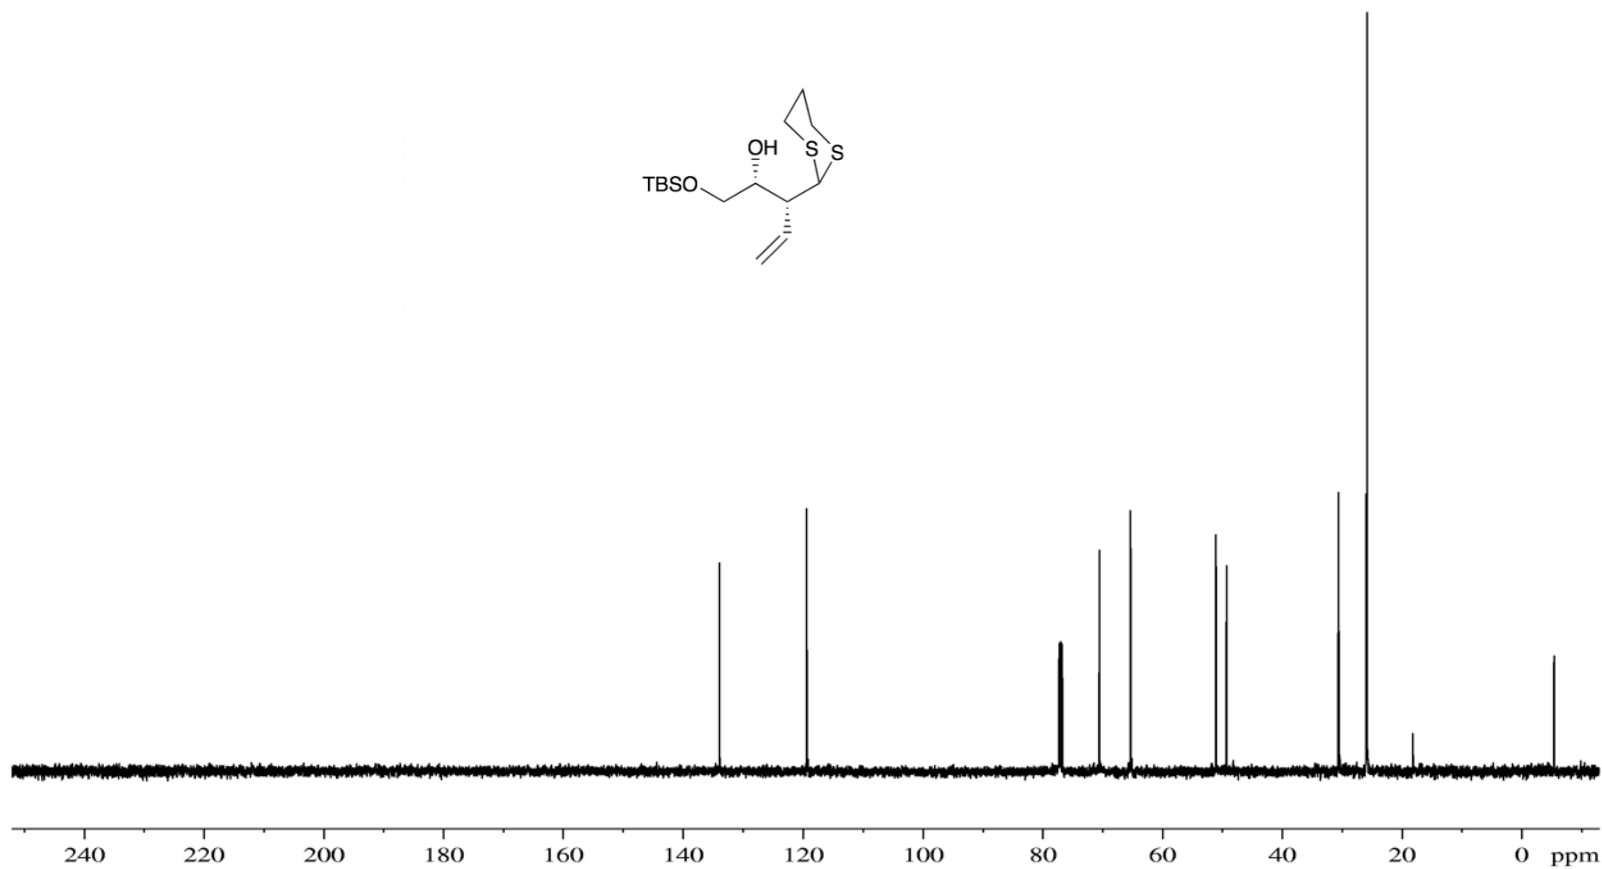

The  $^{13}\text{C}$  NMR Spectrum of Compound mono-protected (-)-12 in  $\text{CDCl}_3$

S153

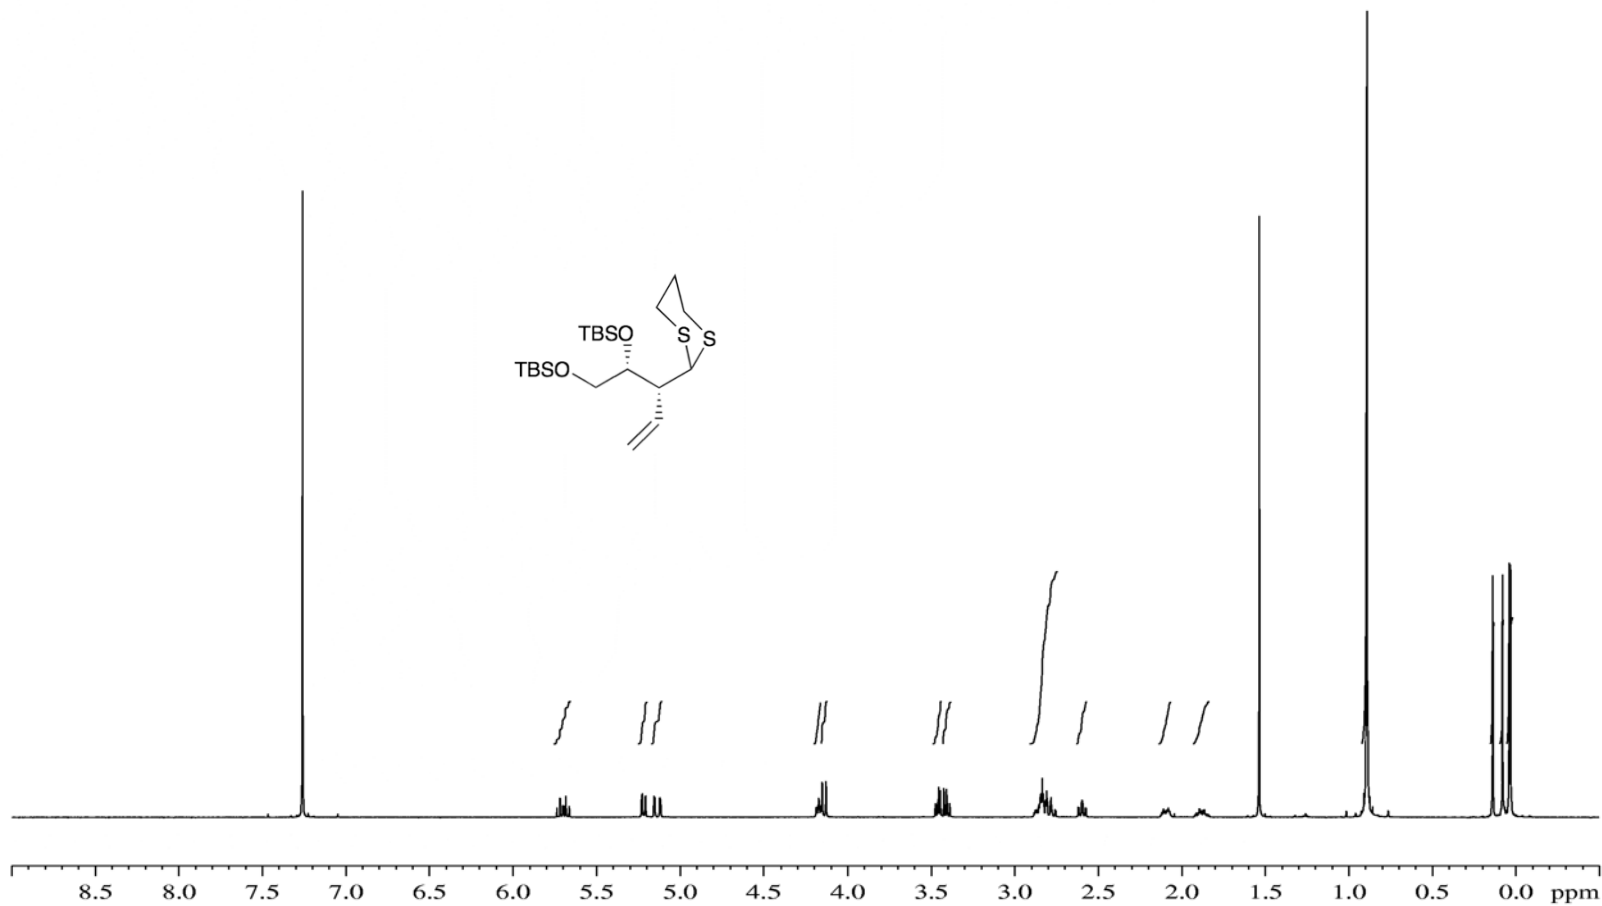

The <sup>1</sup>H NMR Spectrum of Compound (-)-12 in CDCl<sub>3</sub>

S154

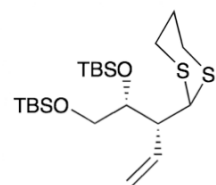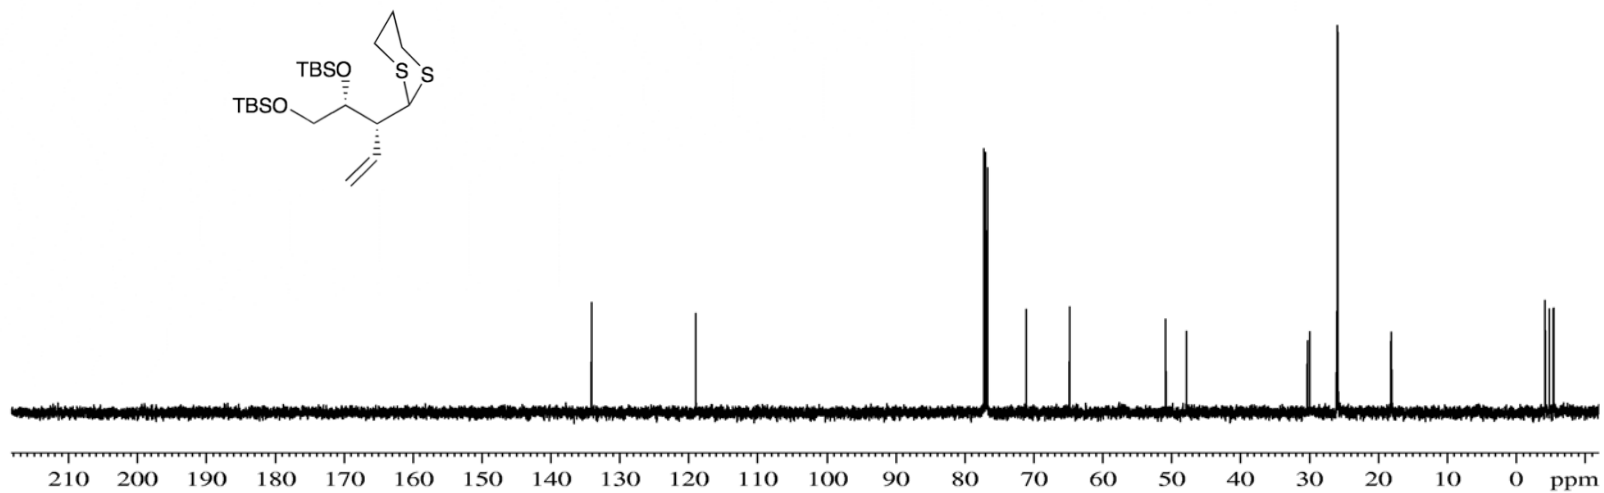

The <sup>13</sup>C NMR Spectrum of Compound (-)-**12** in CDCl<sub>3</sub>

S155

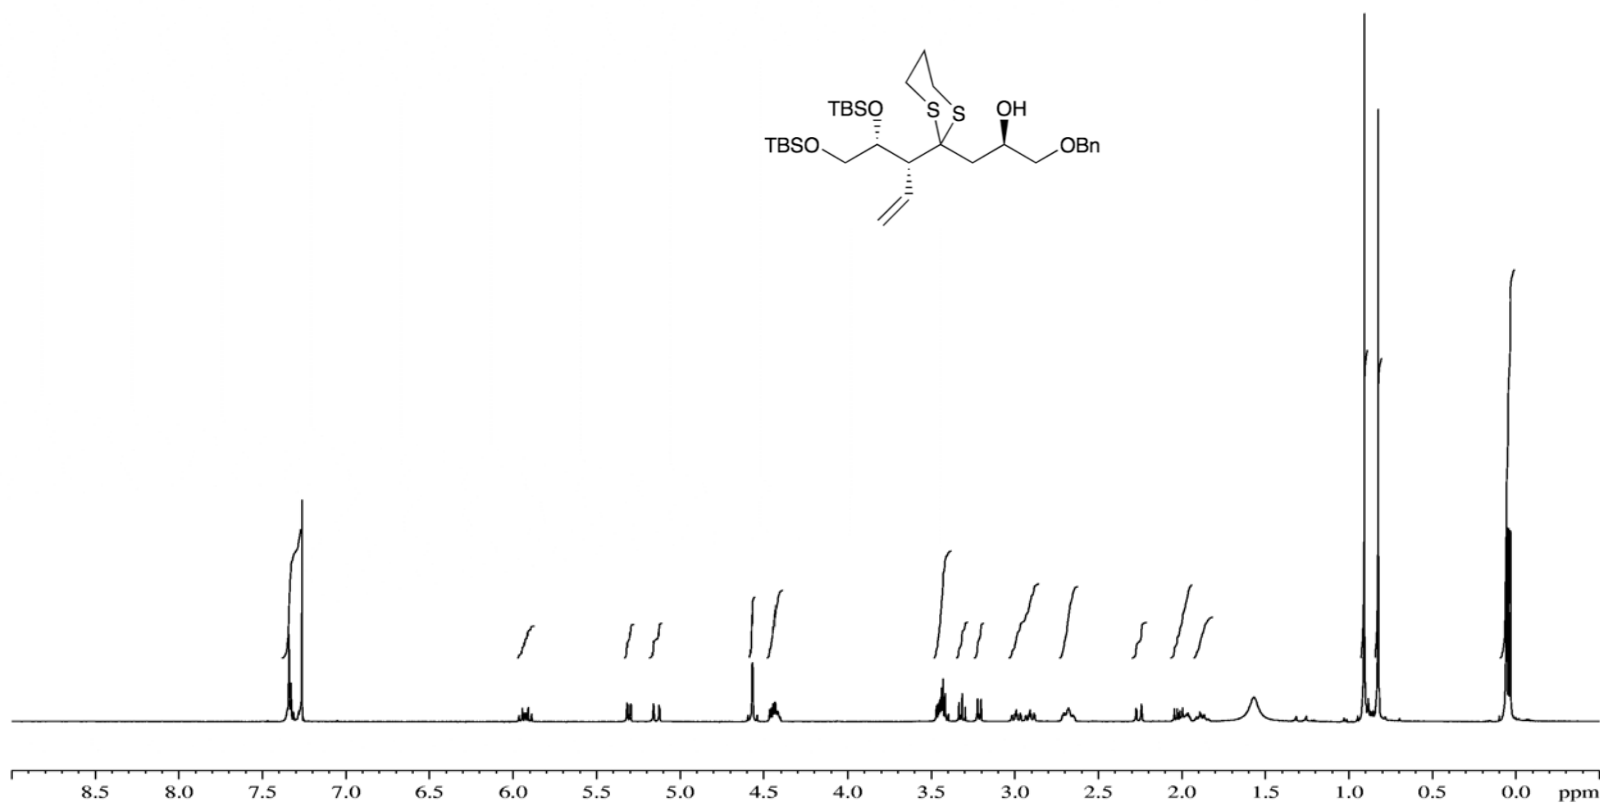

The <sup>1</sup>H NMR Spectrum of Compound (-)-34 in CDCl<sub>3</sub>

S156

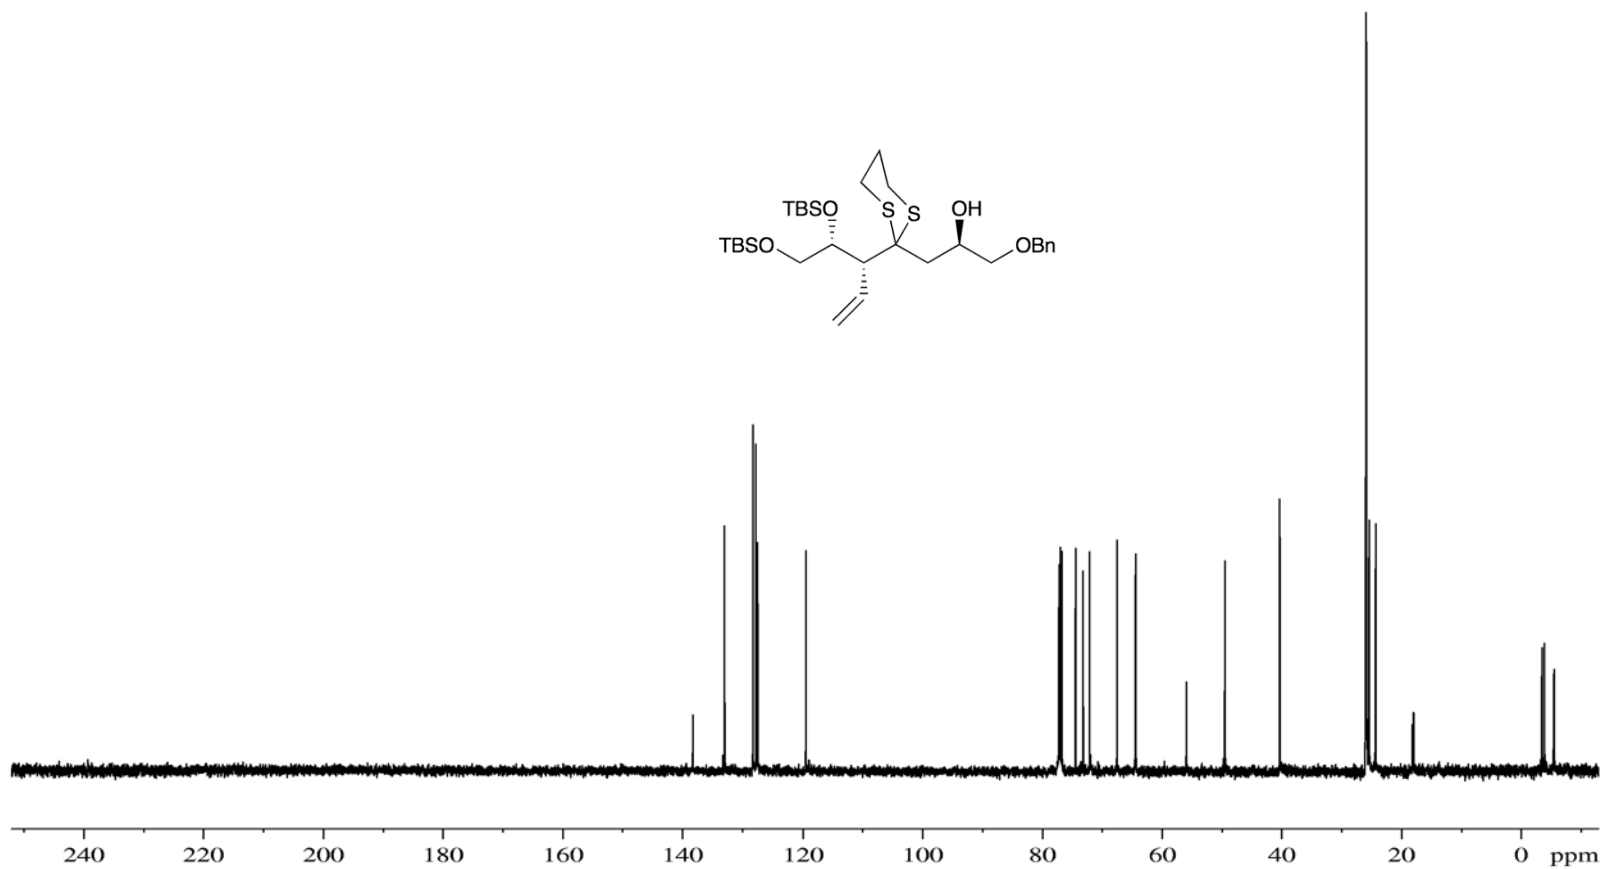

The  $^{13}\text{C}$  NMR Spectrum of Compound (-)-**34** in  $\text{CDCl}_3$

S157

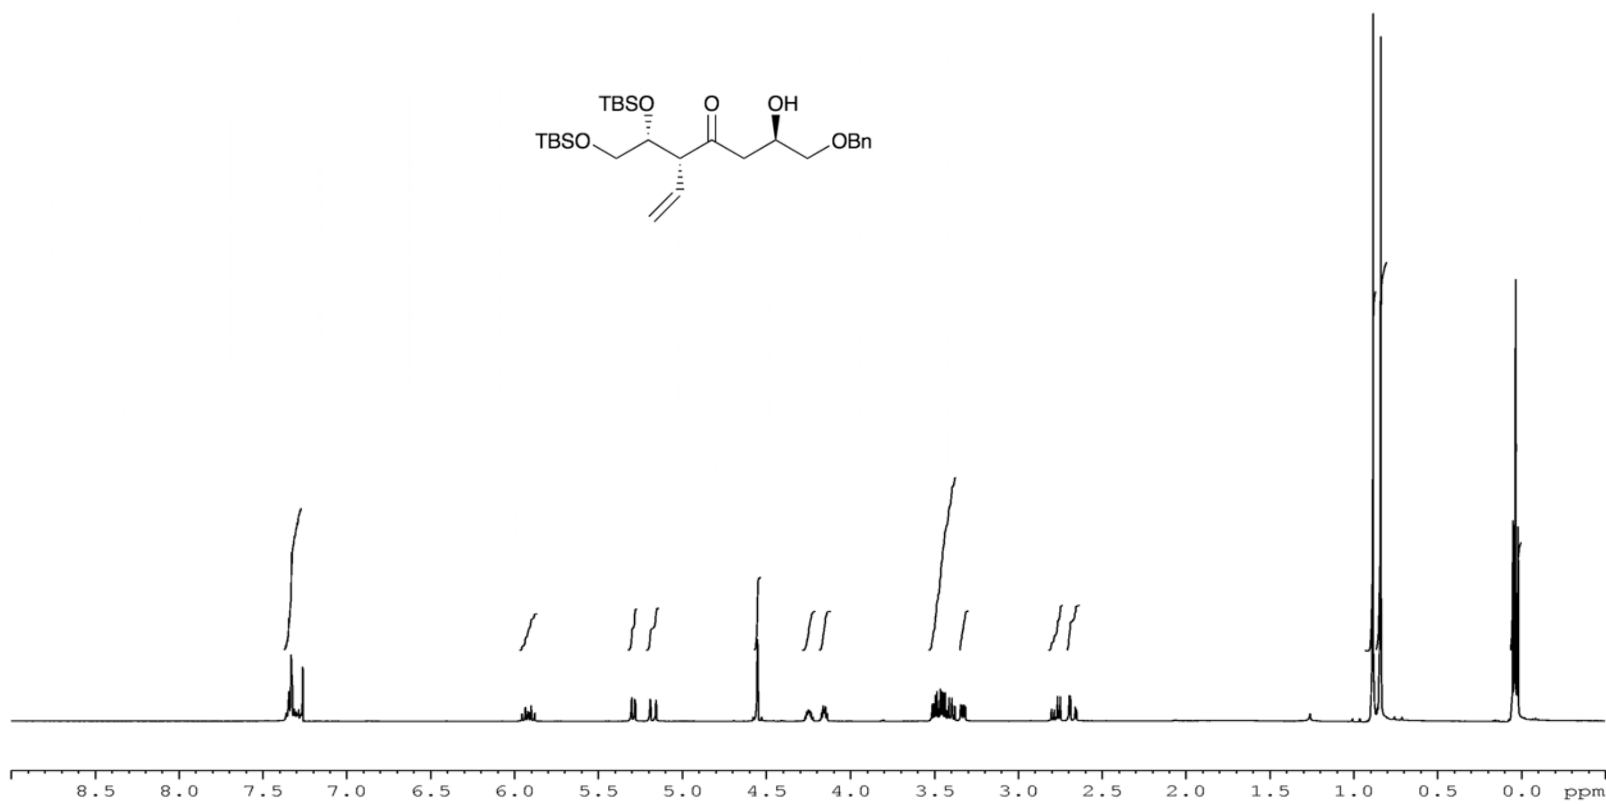

The <sup>1</sup>H NMR Spectrum of Compound (+)-**S11** in CDCl<sub>3</sub>

S158

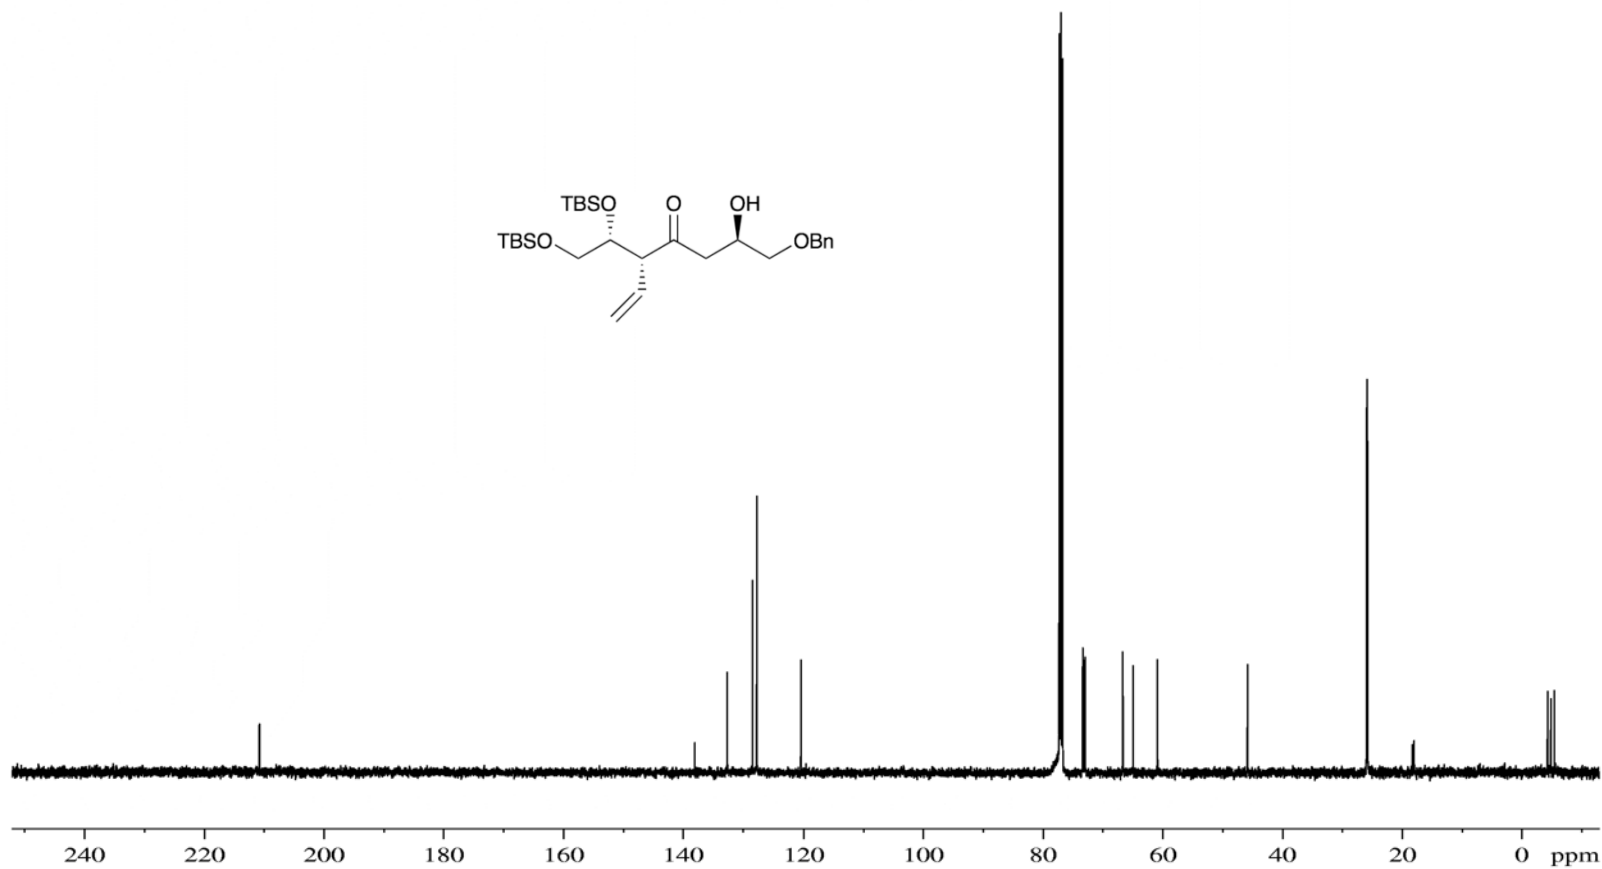

The <sup>13</sup>C NMR Spectrum of Compound (+)-**S11** in CDCl<sub>3</sub>



S159

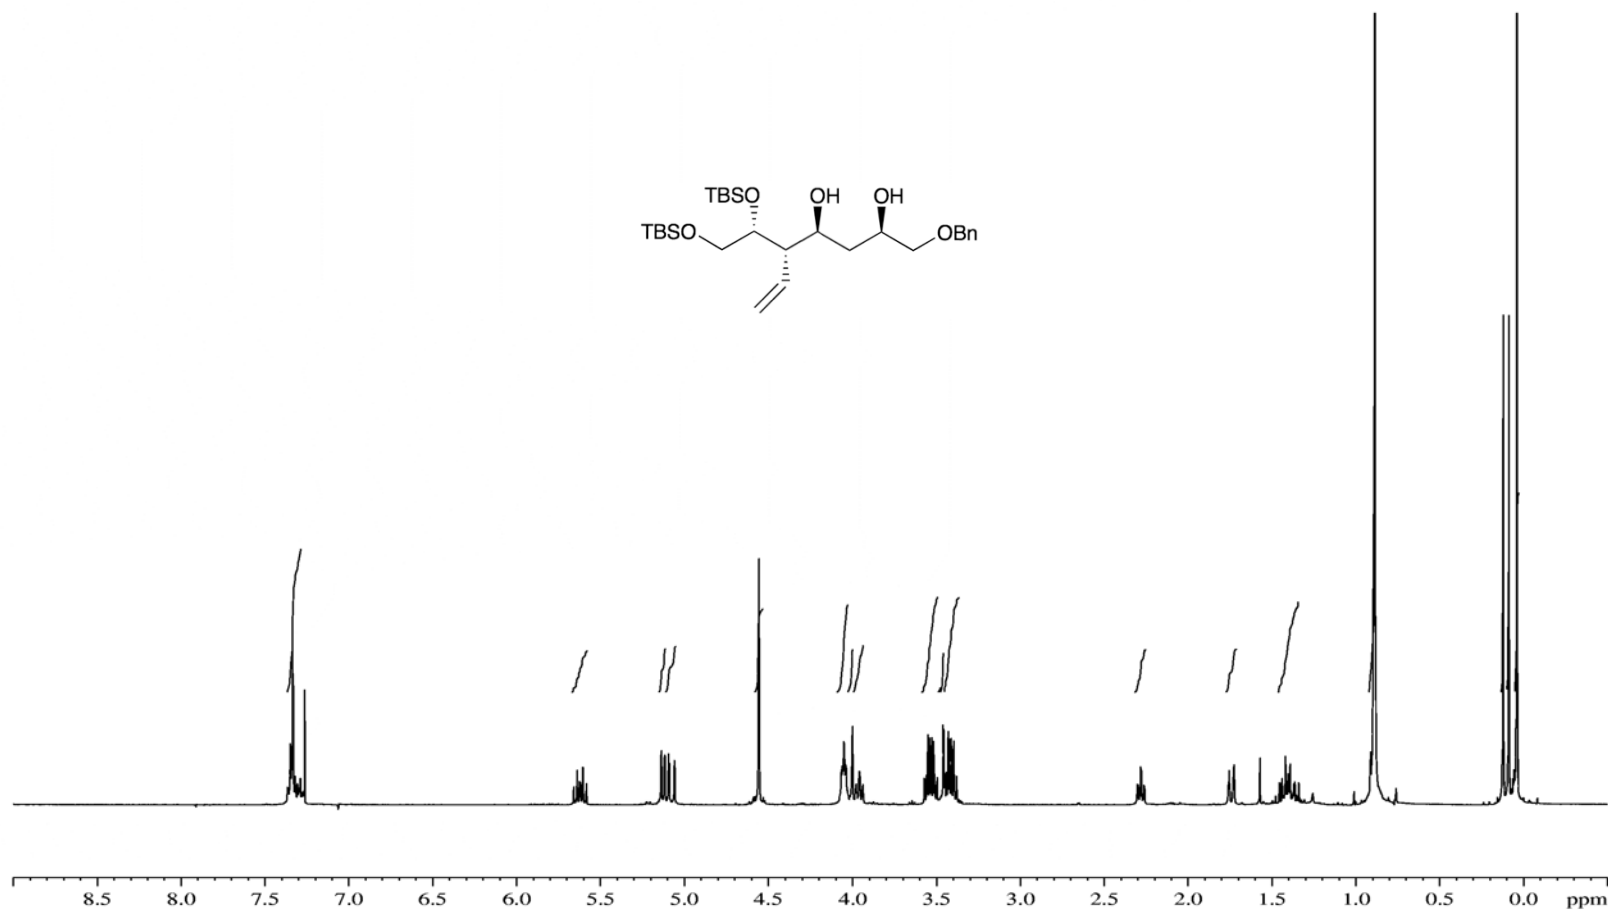

The <sup>1</sup>H NMR Spectrum of Compound (+)-35 in CDCl<sub>3</sub>

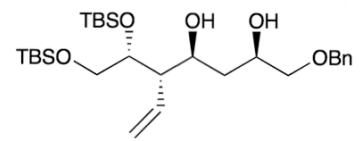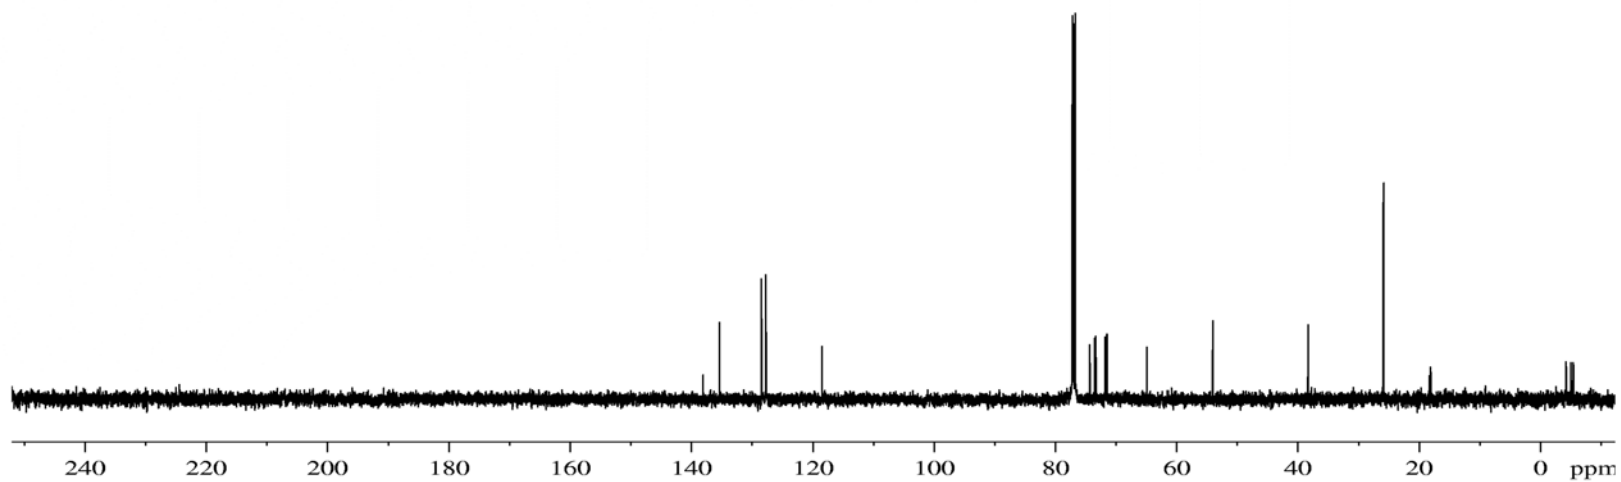

The  $^{13}\text{C}$  NMR Spectrum of Compound (+)-**35** in  $\text{CDCl}_3$

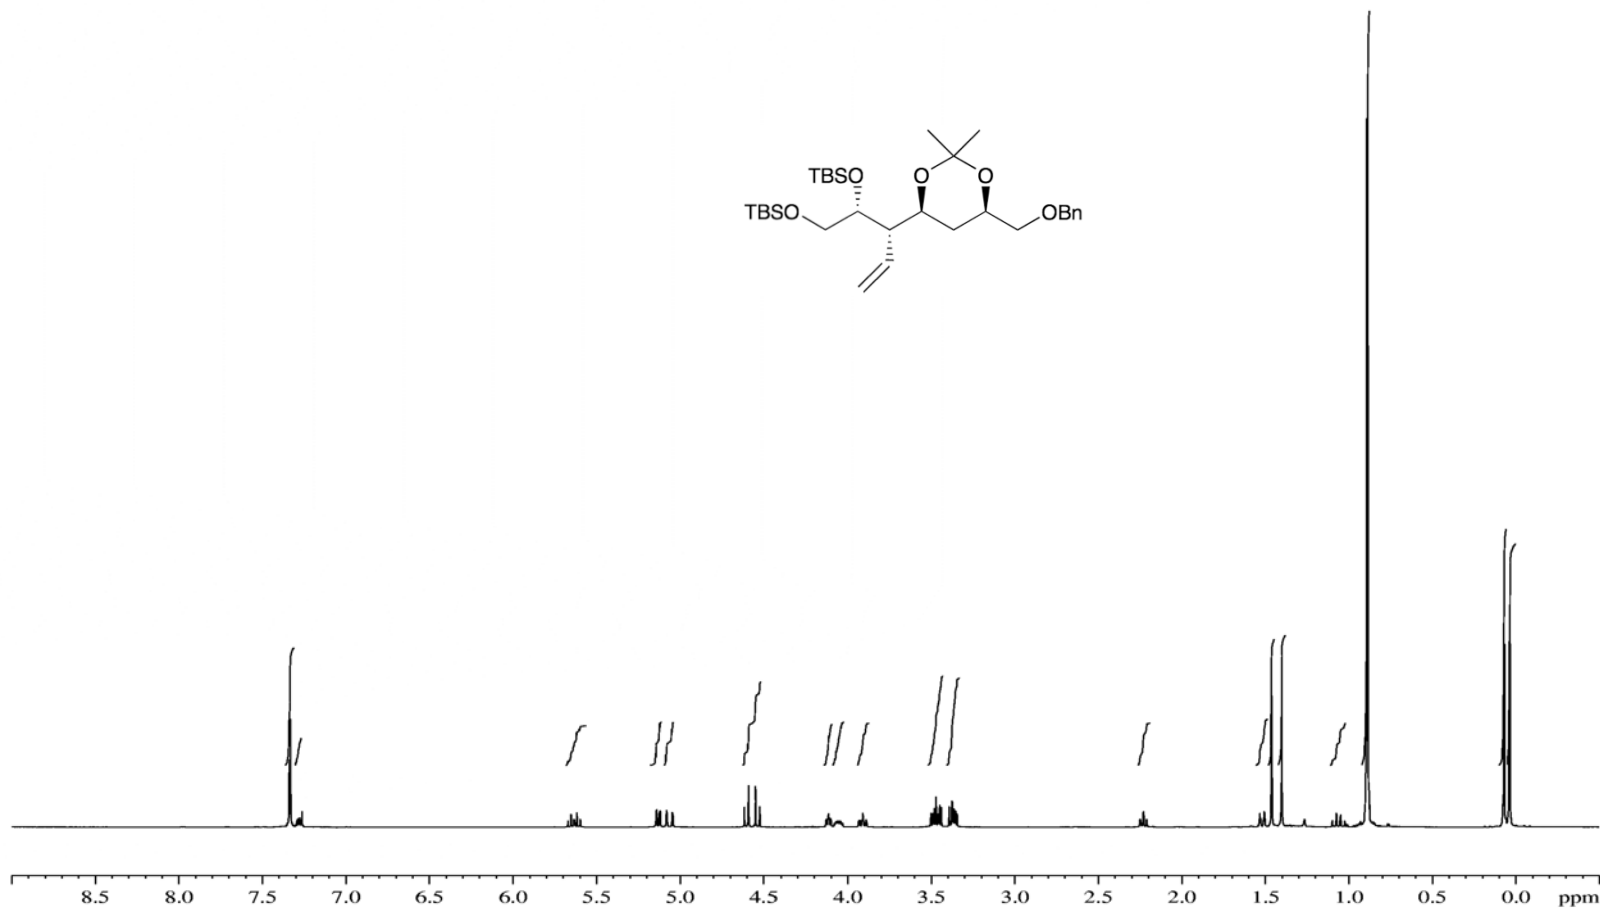

The <sup>1</sup>H NMR Spectrum of Compound (+)-**36** in CDCl<sub>3</sub>

S162

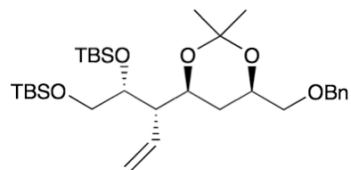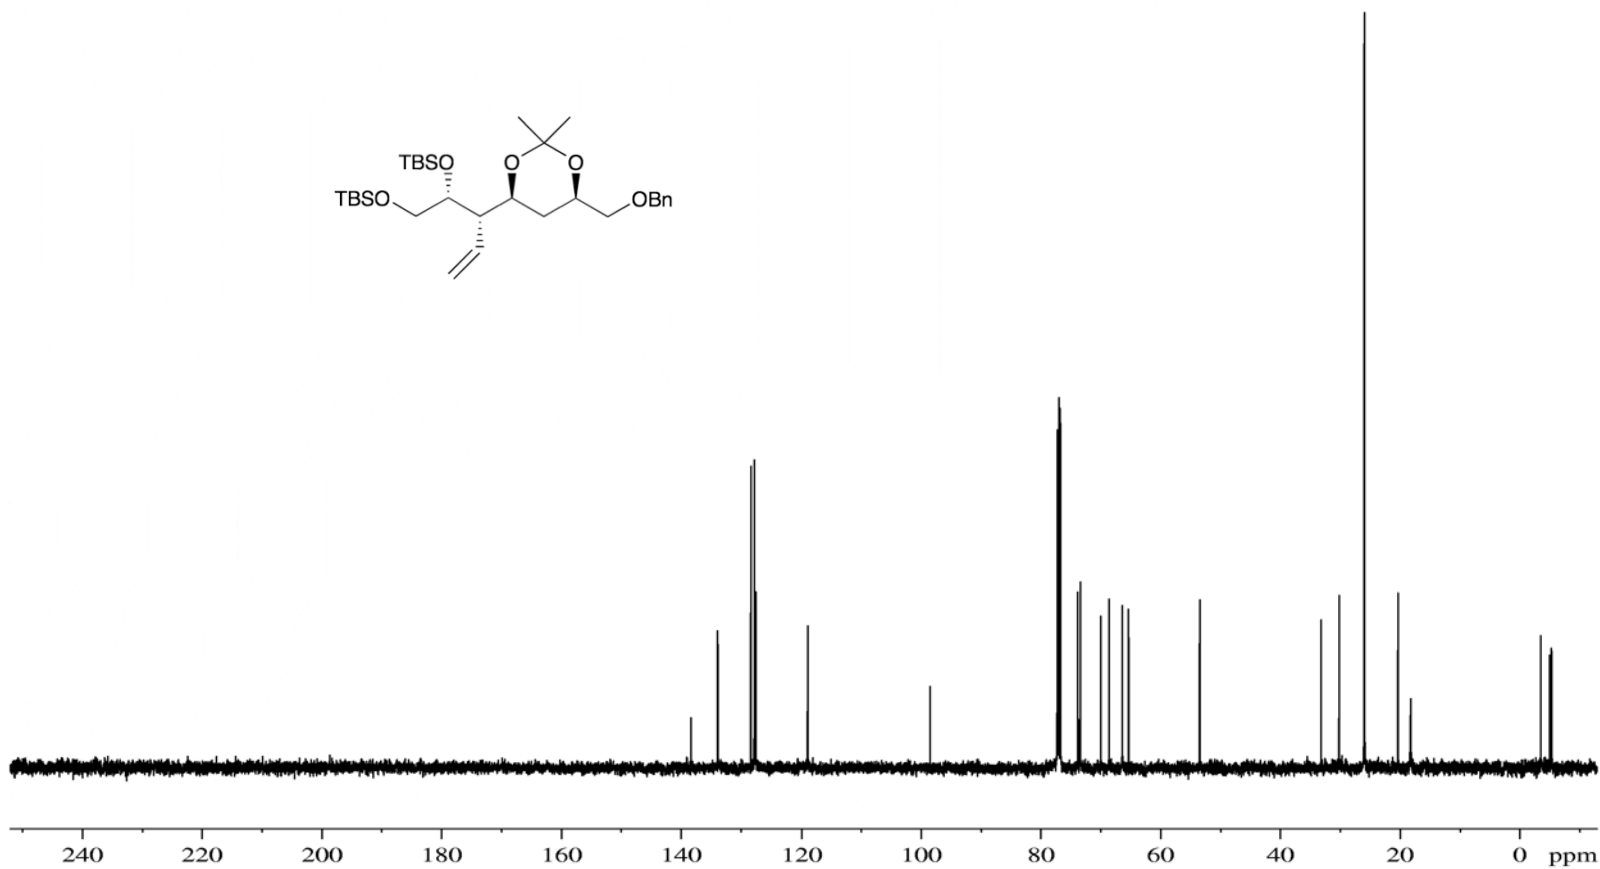

The <sup>13</sup>C NMR Spectrum of Compound (+)-**36** in CDCl<sub>3</sub>

S163

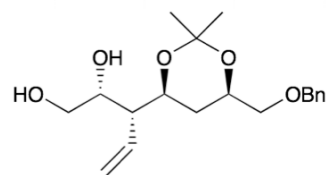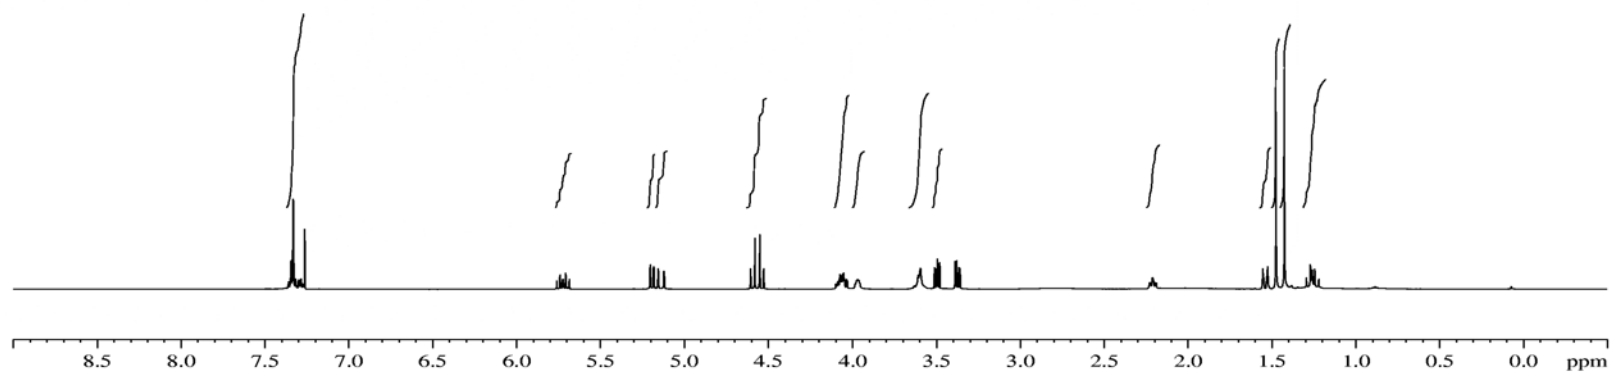

The <sup>1</sup>H NMR Spectrum of Compound (+)-**S12** in CDCl<sub>3</sub>

S164

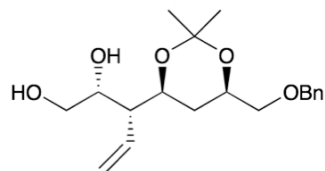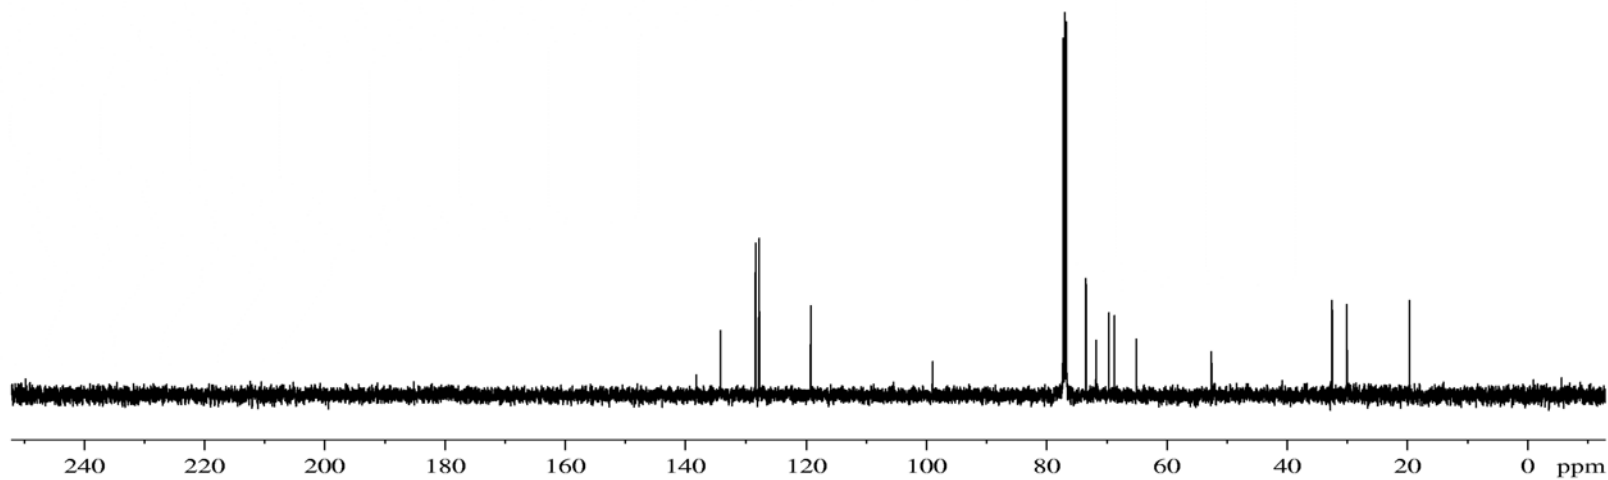

The <sup>13</sup>C NMR Spectrum of Compound (+)-**S12** in CDCl<sub>3</sub>

S165

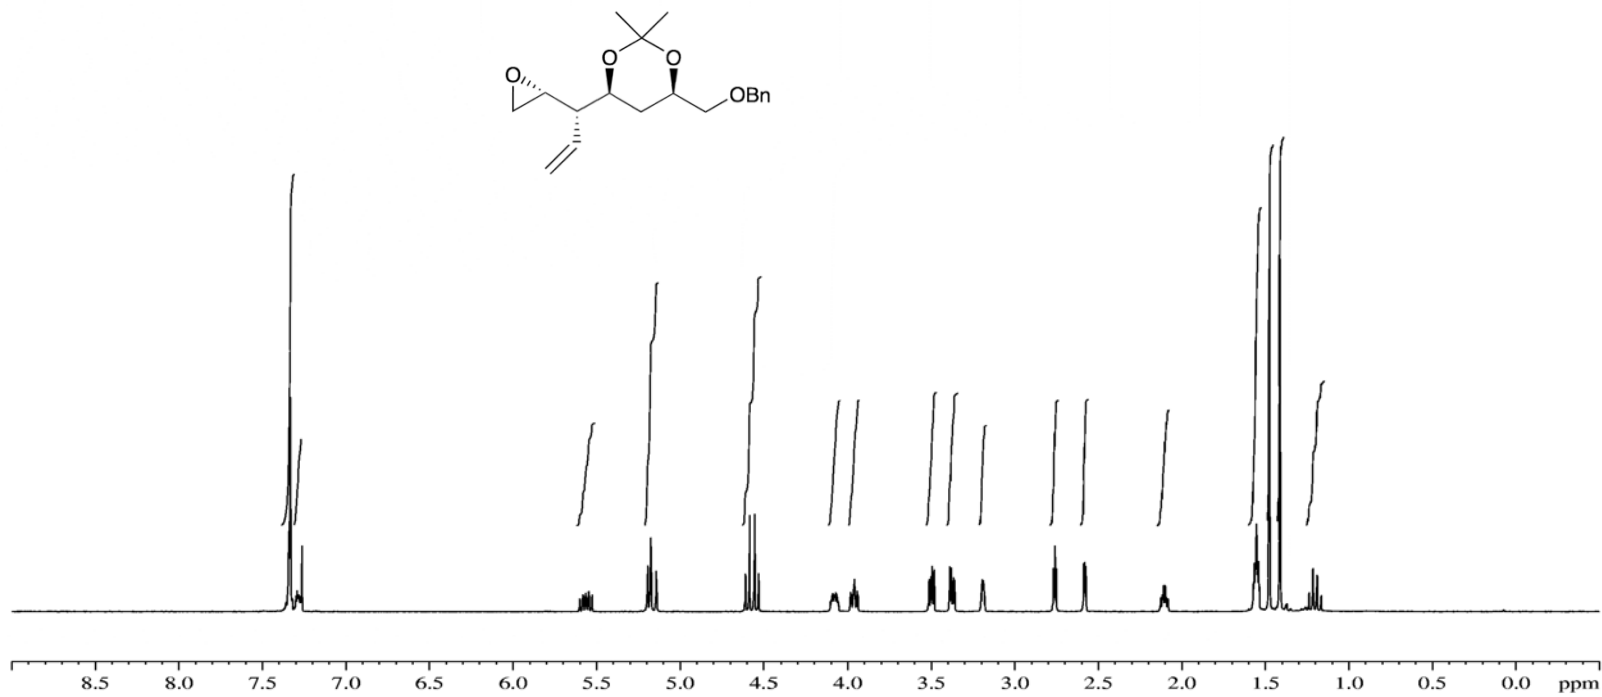

The <sup>1</sup>H NMR Spectrum of Compound (+)-9 in CDCl<sub>3</sub>

S166

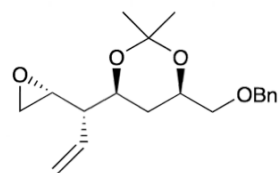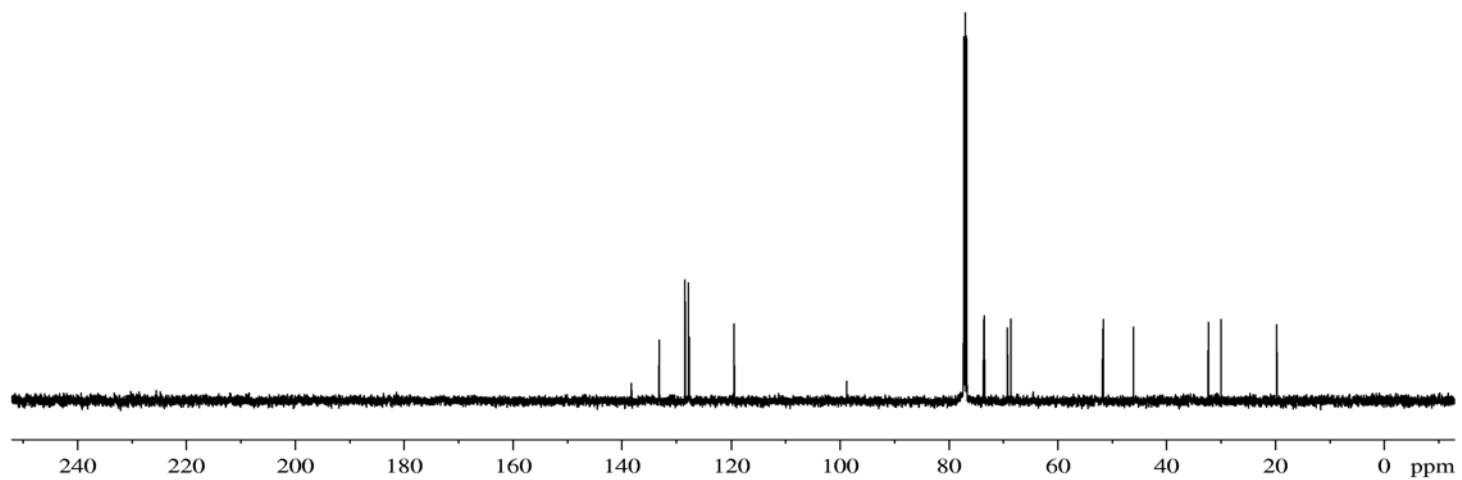

The <sup>13</sup>C NMR Spectrum of Compound (+)-**9** in CDCl<sub>3</sub>



S167

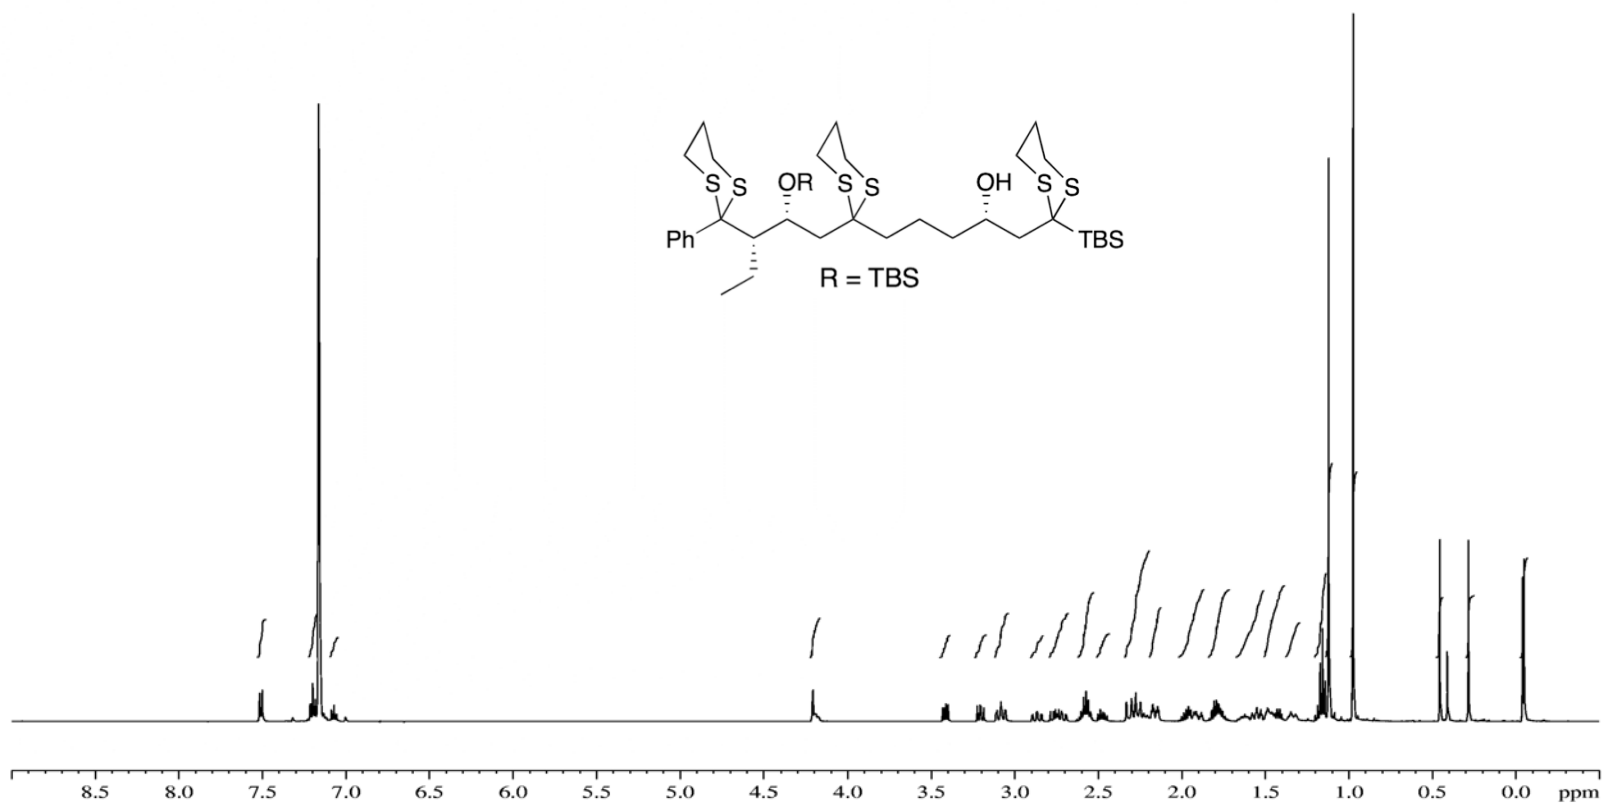

The  $^1\text{H}$  NMR Spectrum of Compound (-)-**37** in  $\text{C}_6\text{D}_6$

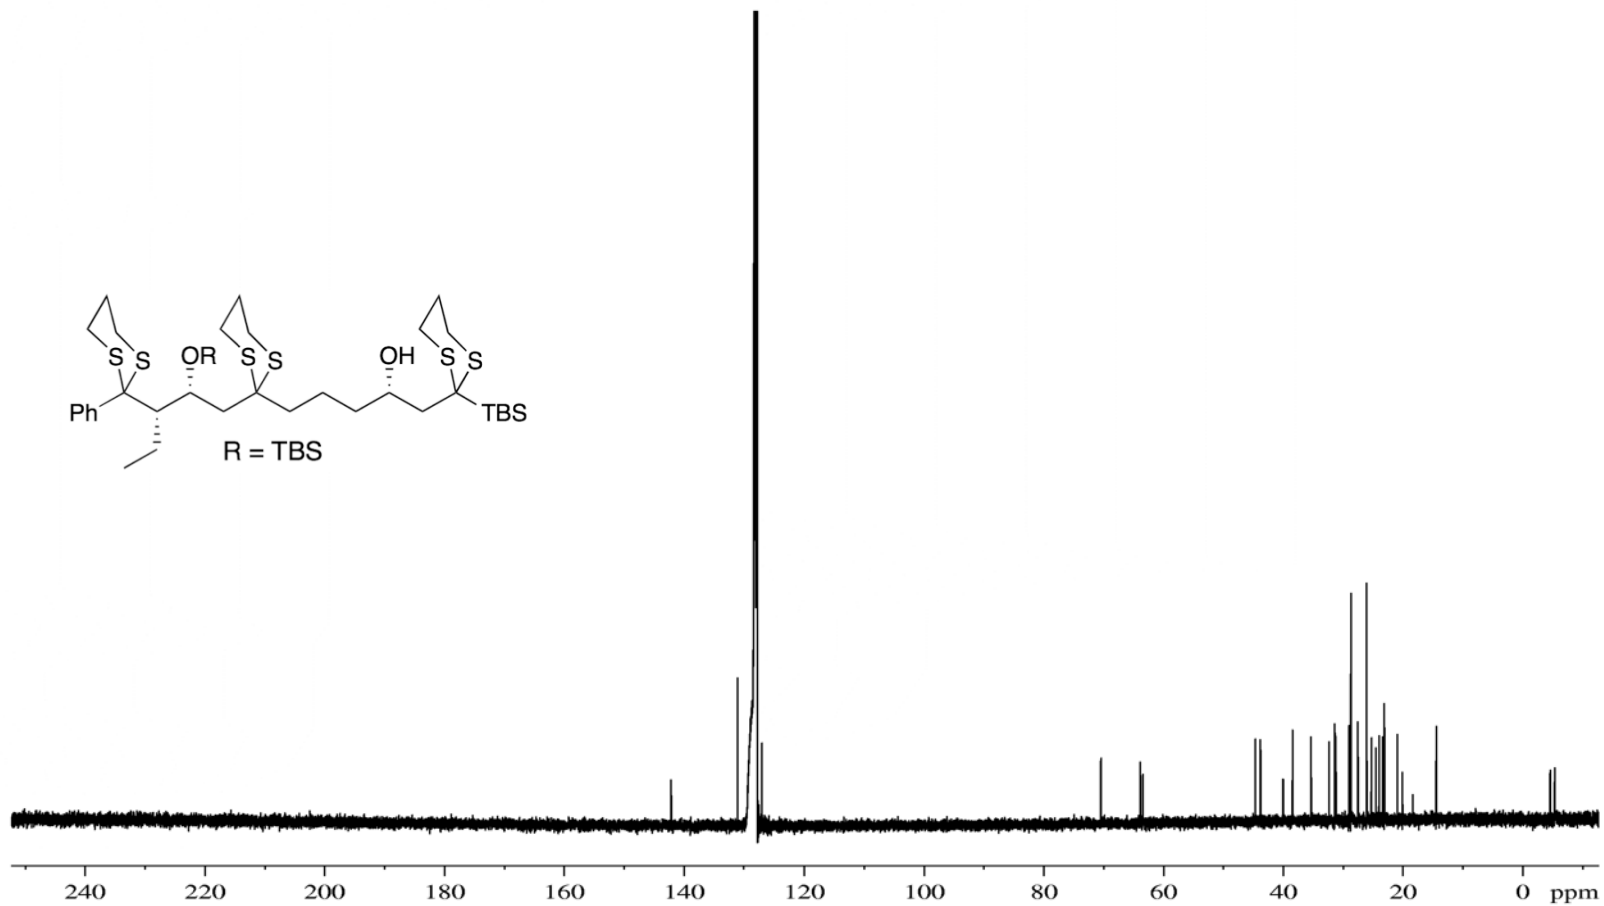The  $^{13}\text{C}$  NMR Spectrum of Compound (-)-**37** in  $\text{C}_6\text{D}_6$

S169

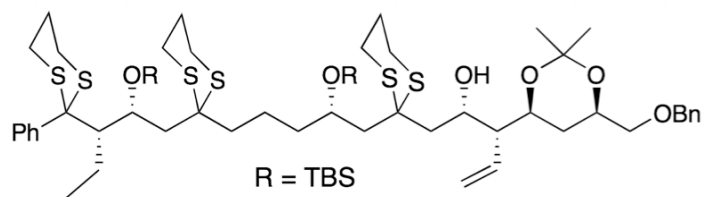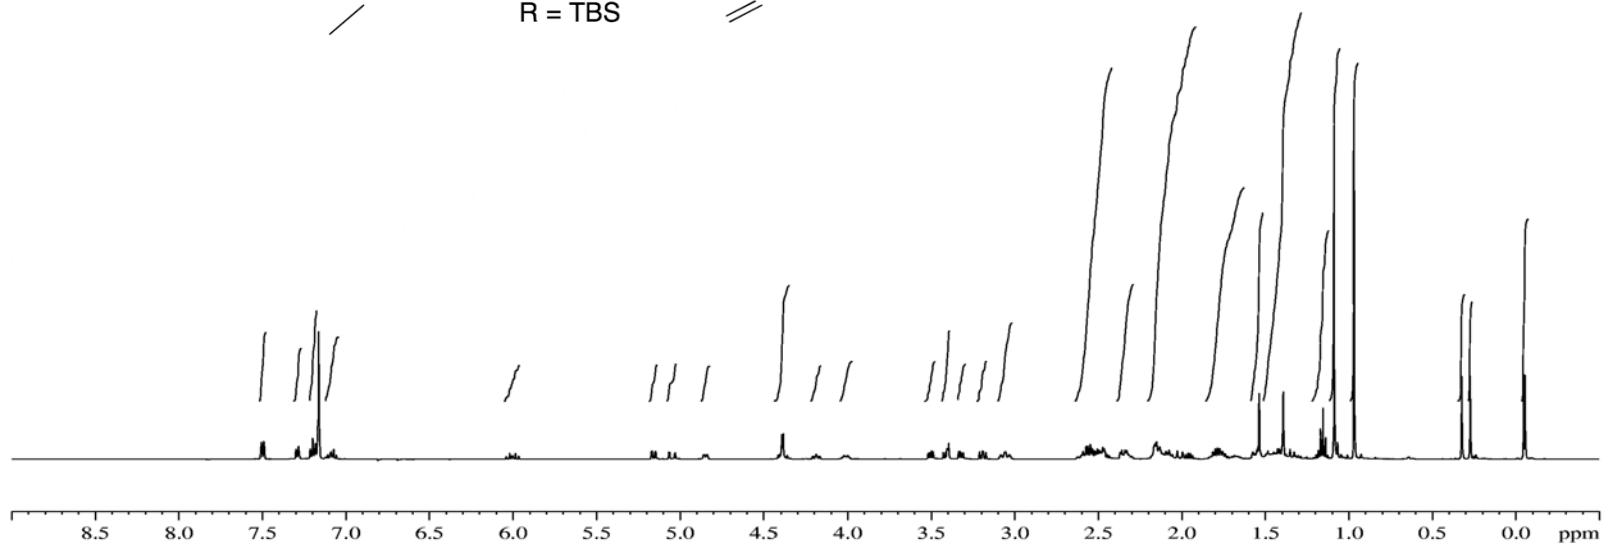

The <sup>1</sup>H NMR Spectrum of Compound (-)-40 in C<sub>6</sub>D<sub>6</sub>

S170

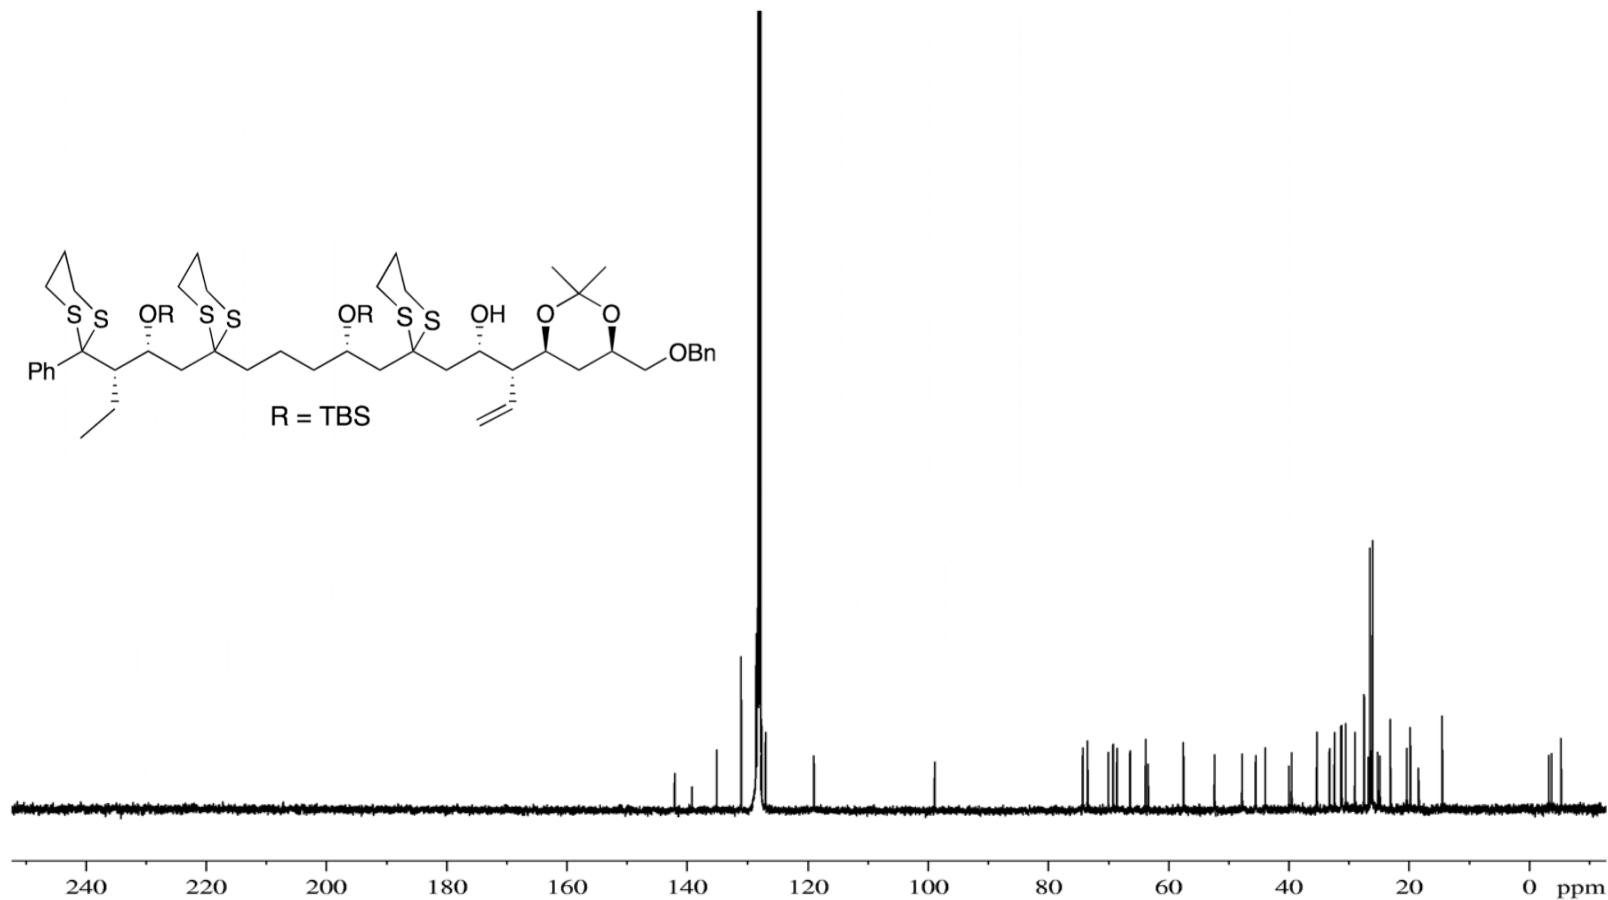

The  $^{13}\text{C}$  NMR Spectrum of Compound (-)-40 in  $\text{C}_6\text{D}_6$

S171

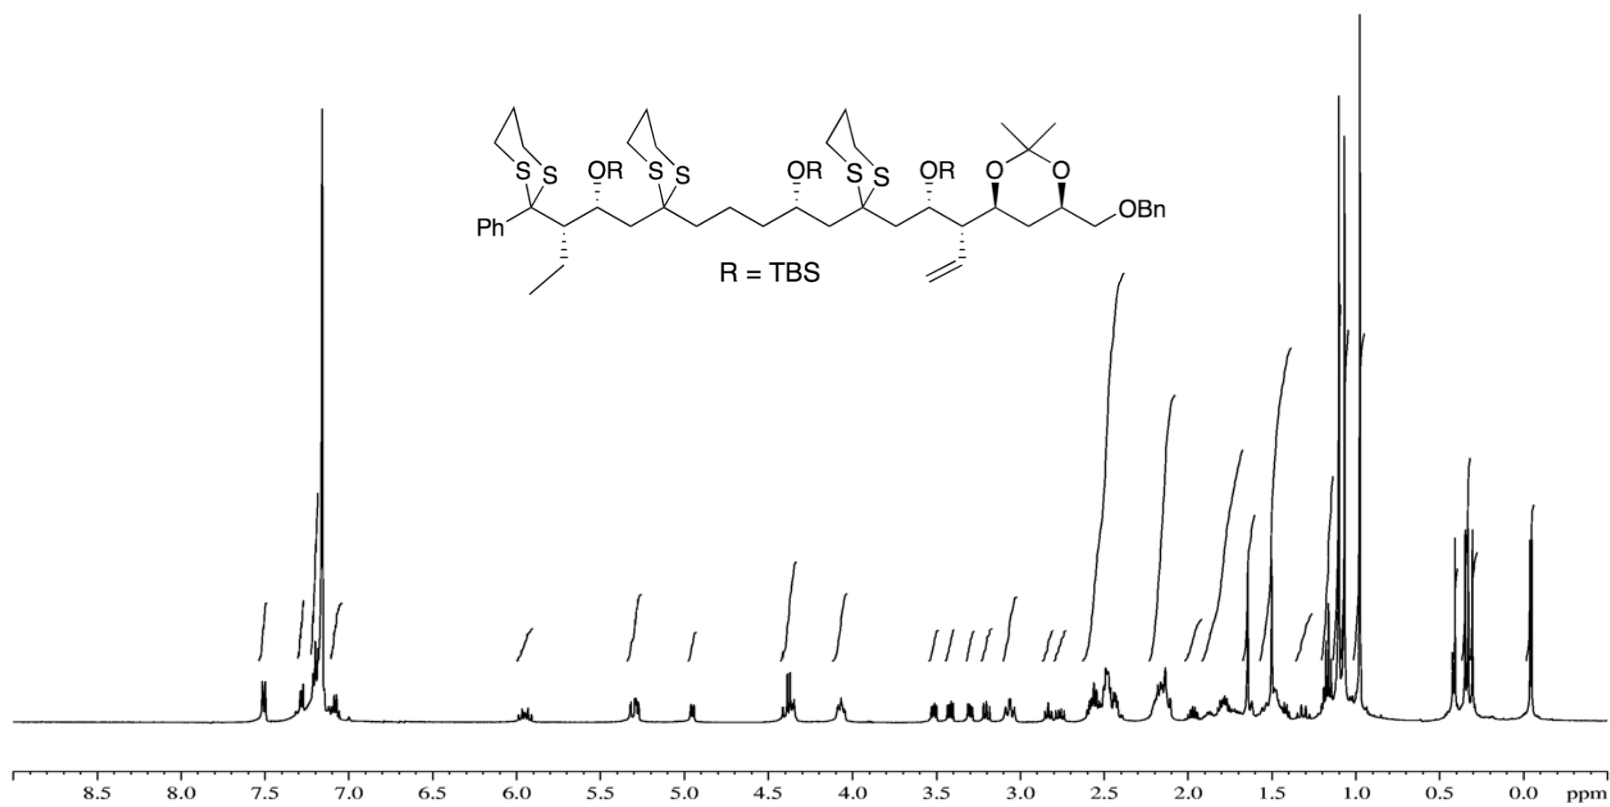

The  $^1\text{H}$  NMR Spectrum of Compound (+)-6 in  $\text{C}_6\text{D}_6$

S172

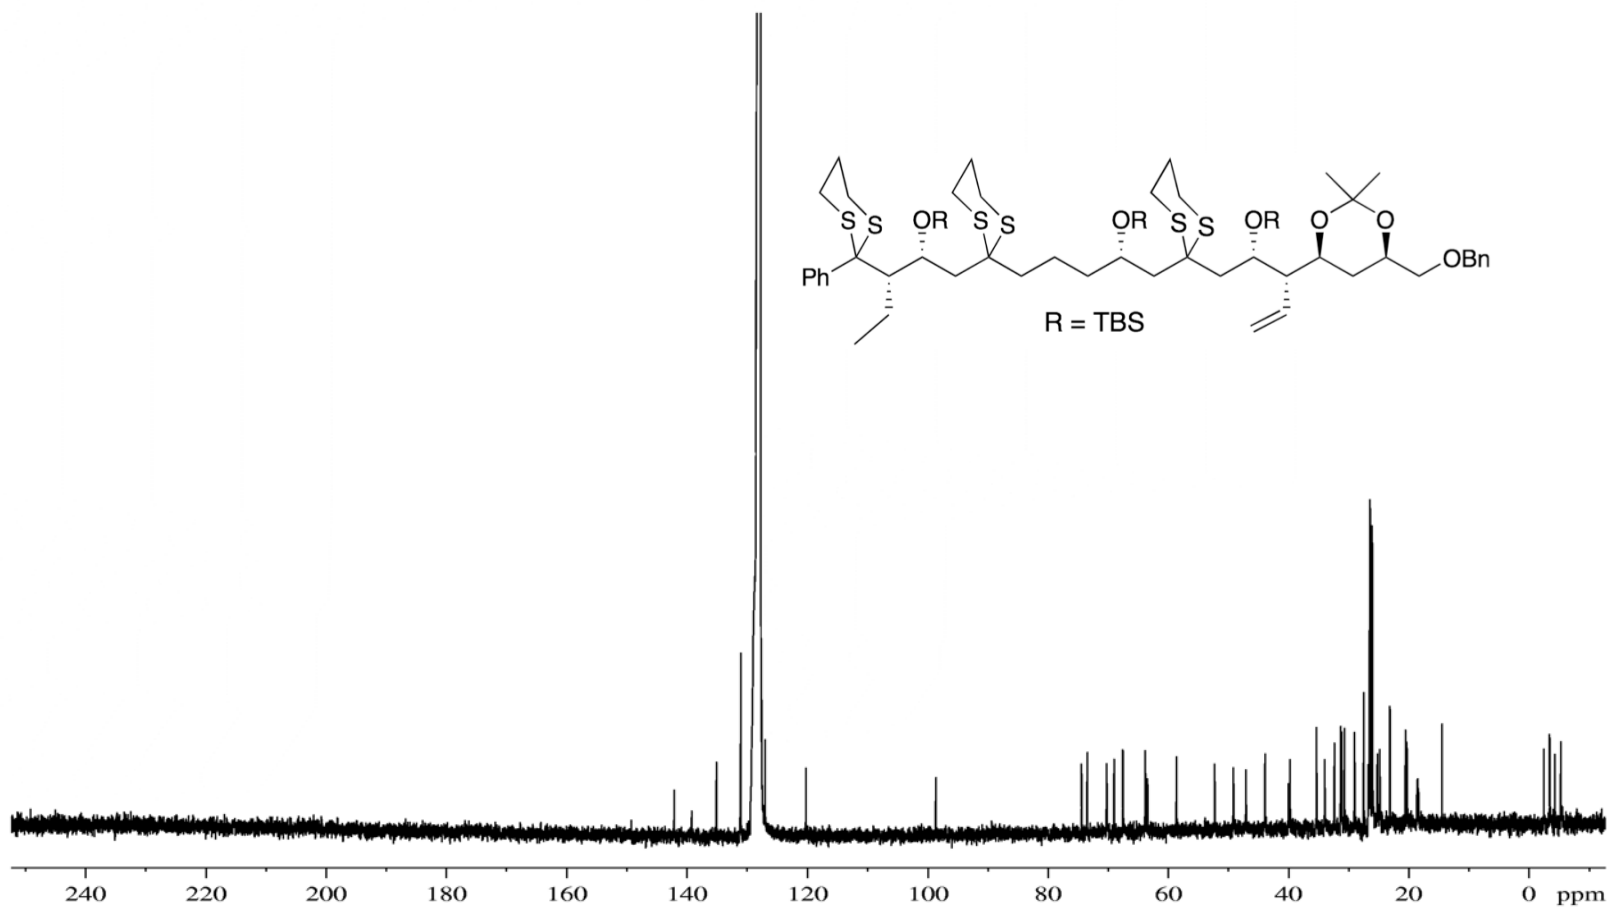

The  $^{13}\text{C}$  NMR Spectrum of Compound (+)-6 in  $\text{C}_6\text{D}_6$

S173

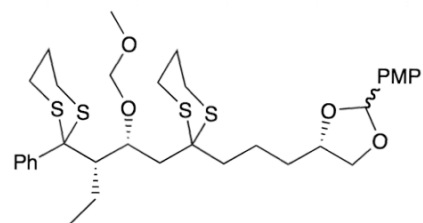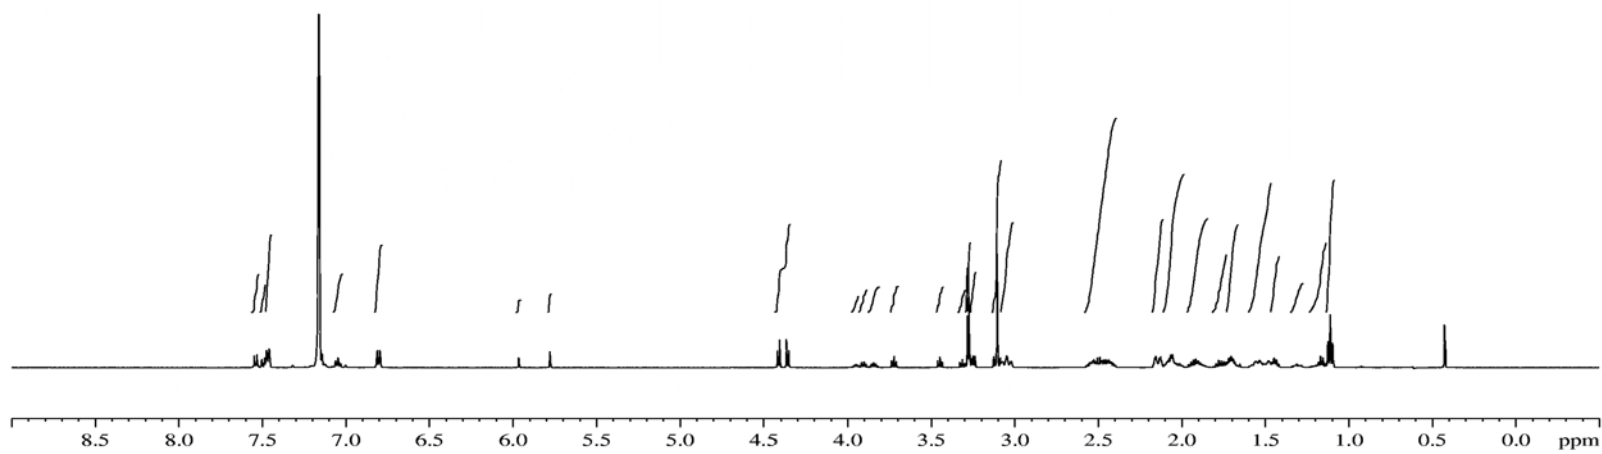

The <sup>1</sup>H NMR Spectrum of Compound **S13** in C<sub>6</sub>D<sub>6</sub>

S174

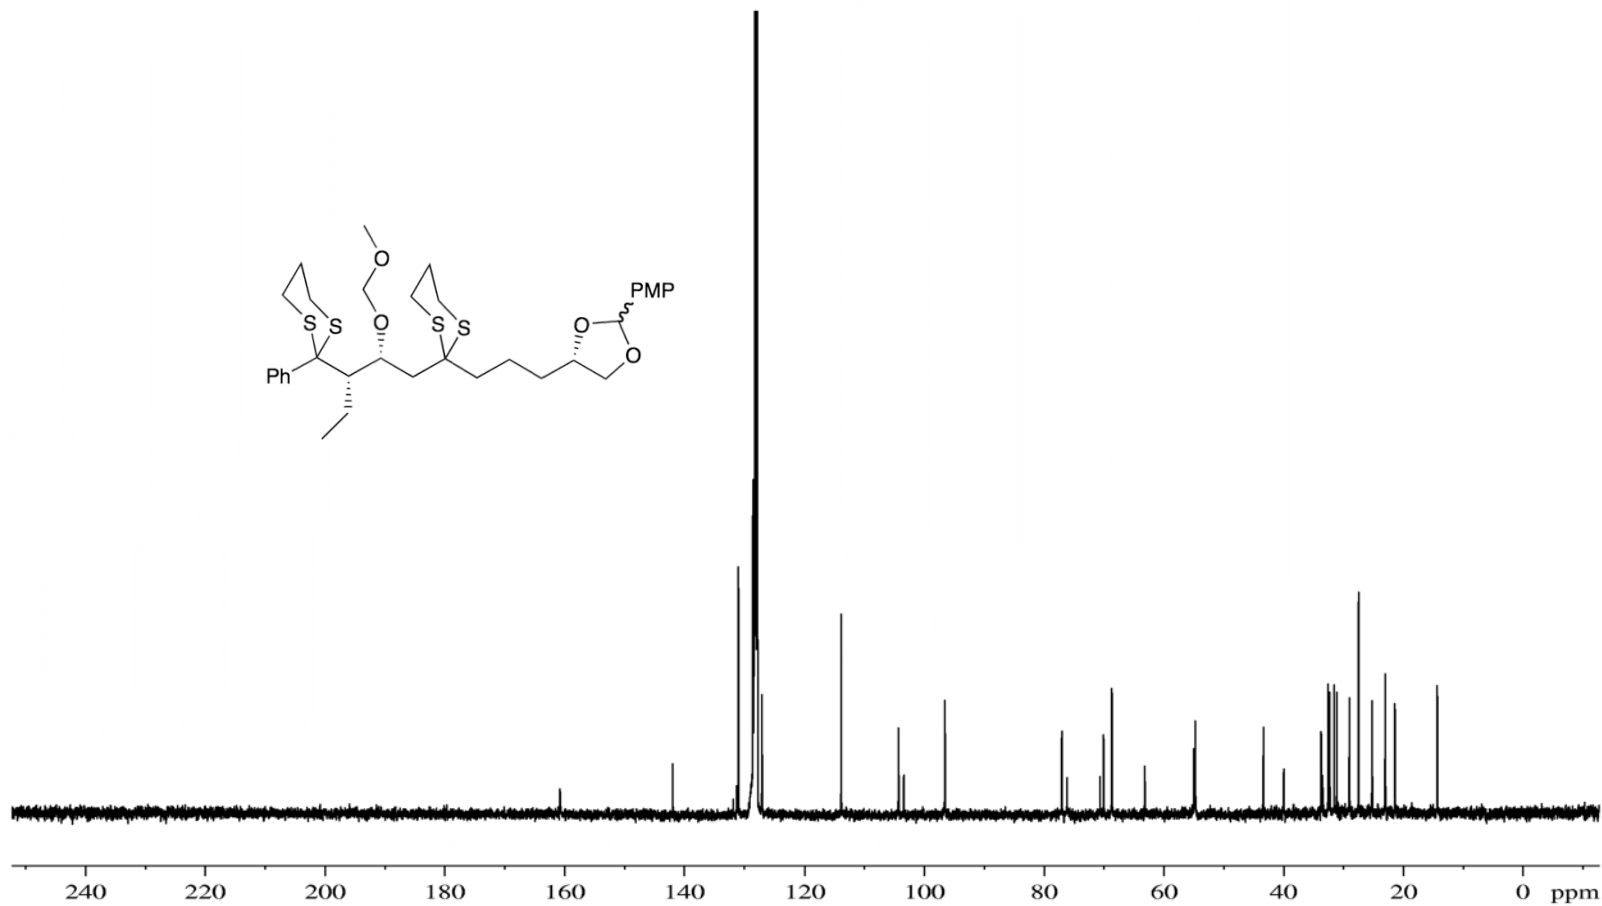

The  $^{13}\text{C}$  NMR Spectrum of Compound **S13** in  $\text{C}_6\text{D}_6$



S175

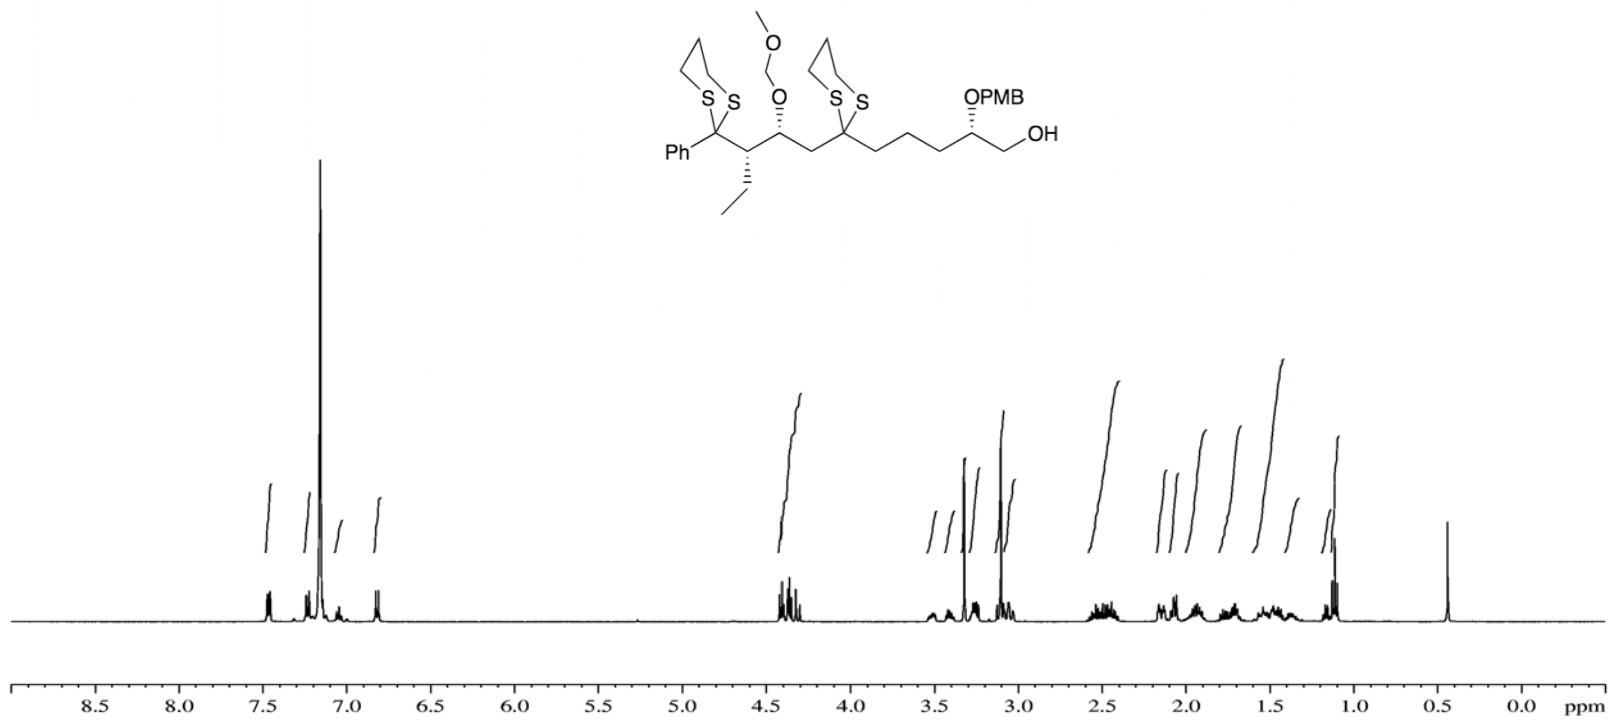

The <sup>1</sup>H NMR Spectrum of Compound (+)-S14 in C<sub>6</sub>D<sub>6</sub>

S176

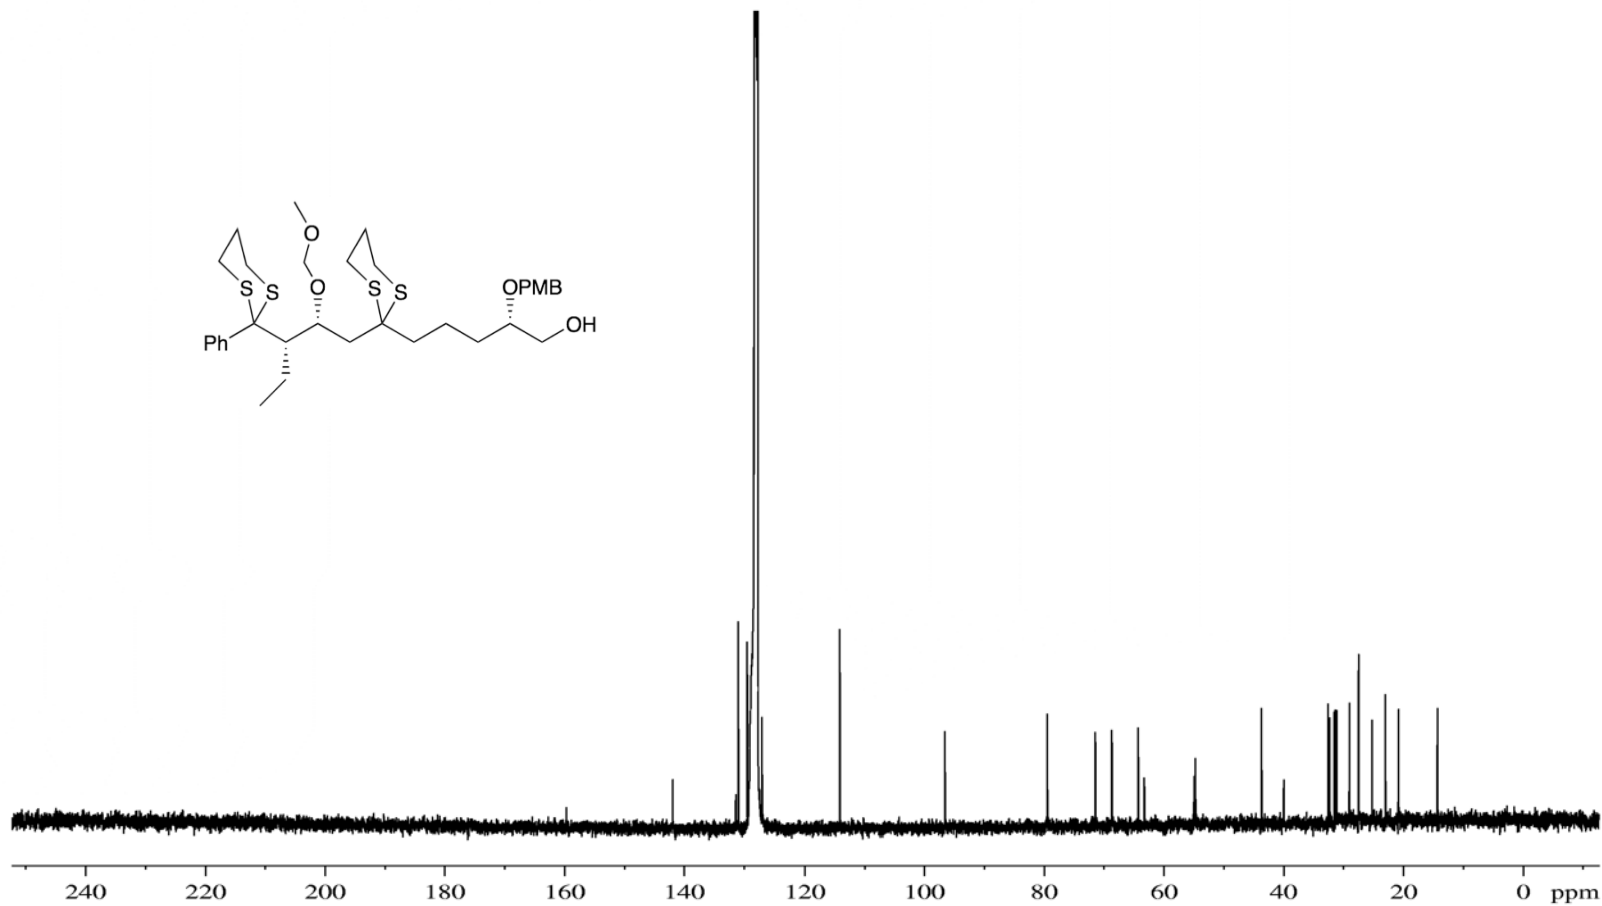

The  $^{13}\text{C}$  NMR Spectrum of Compound (+)-**S14** in  $\text{C}_6\text{D}_6$

S177

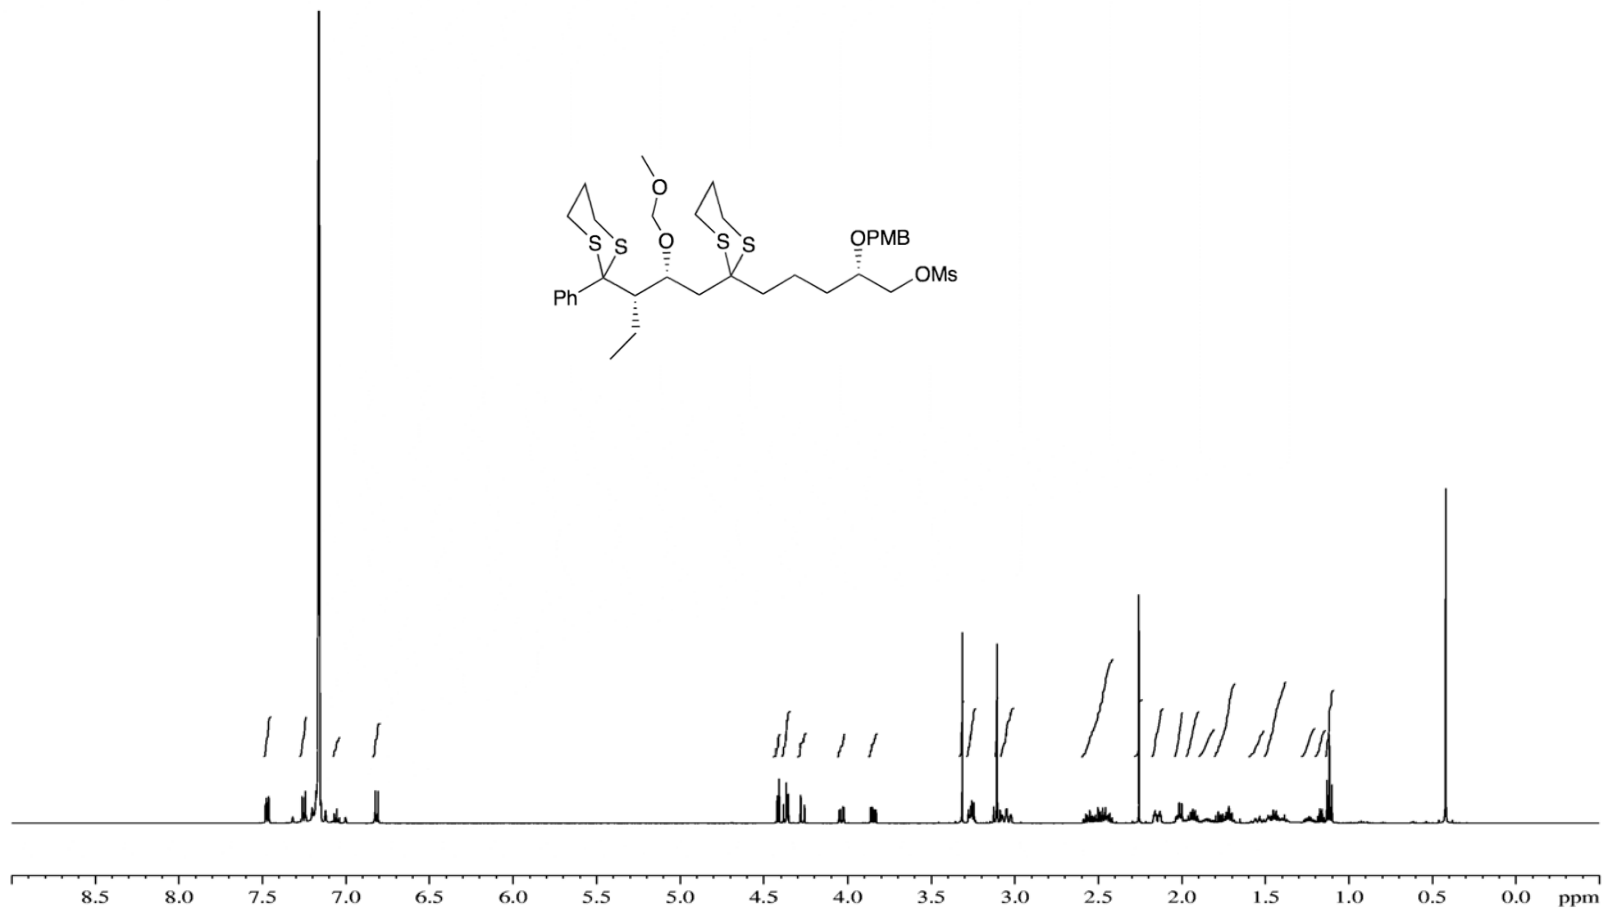

The <sup>1</sup>H NMR Spectrum of Compound (+)-S15 in C<sub>6</sub>D<sub>6</sub>

S178

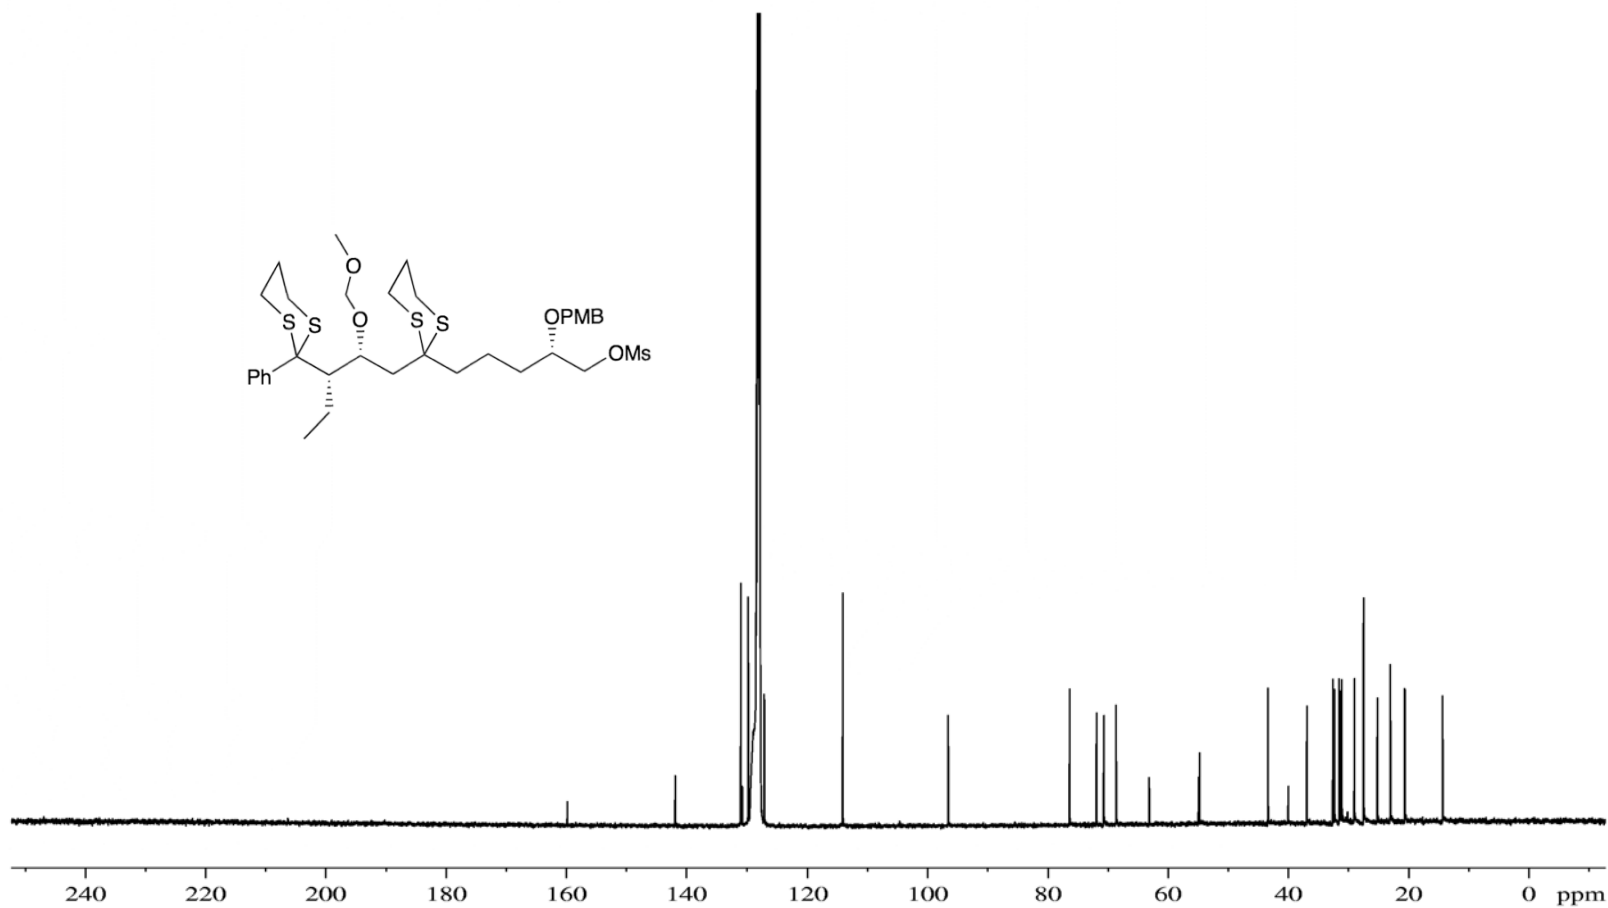

The  $^{13}\text{C}$  NMR Spectrum of Compound (+)-**S15** in  $\text{C}_6\text{D}_6$

S179

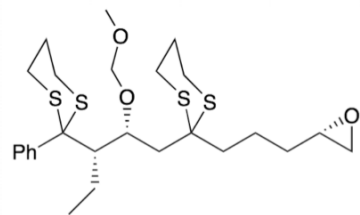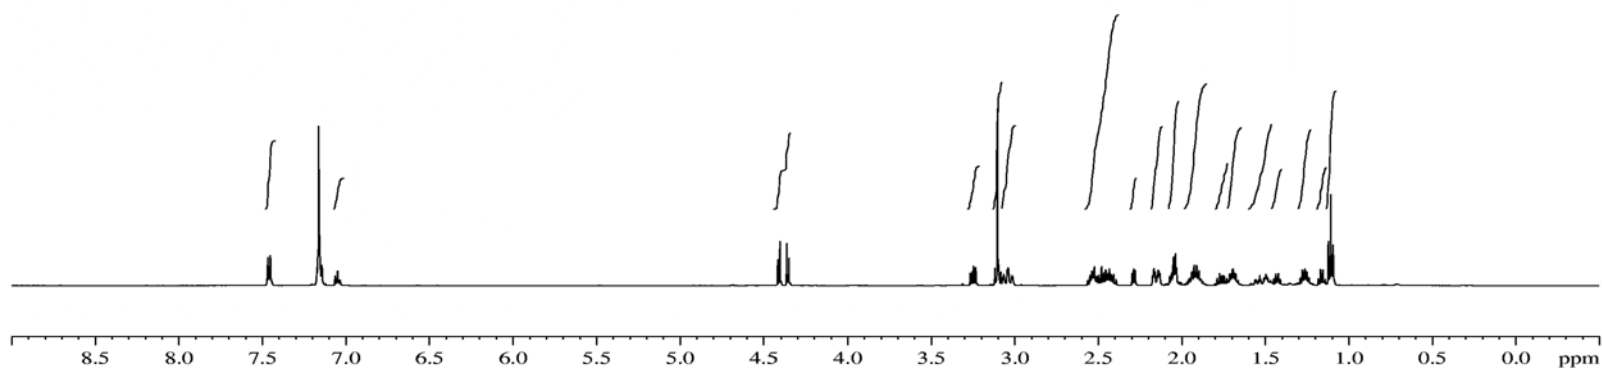

The  $^1\text{H}$  NMR Spectrum of Compound (-)-**41** in  $\text{C}_6\text{D}_6$

S180

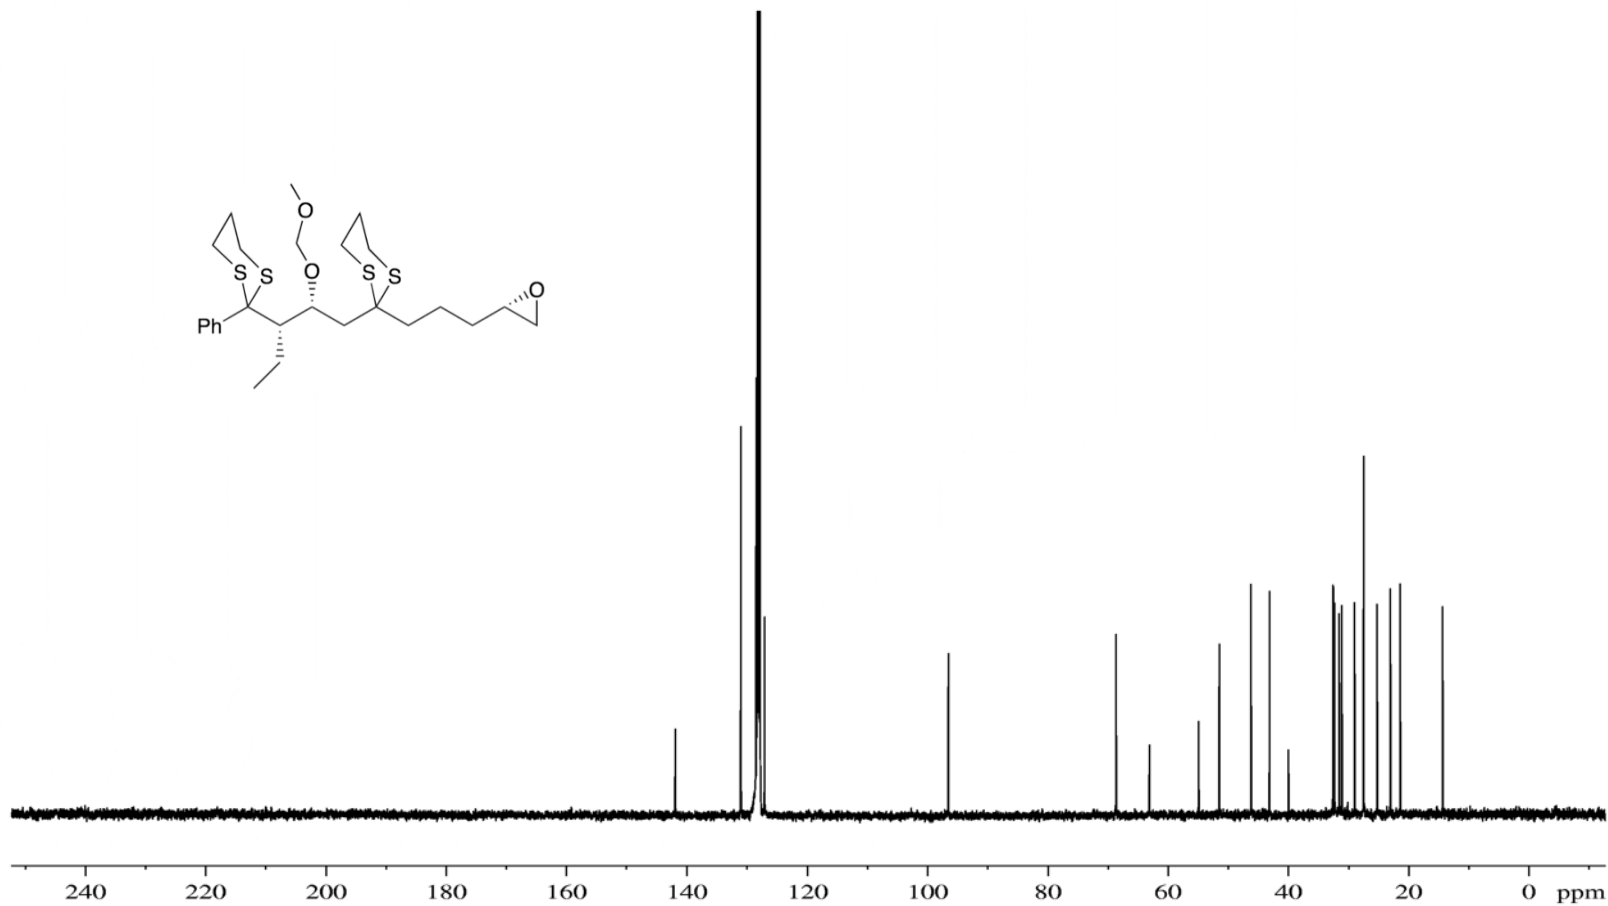

The  $^{13}\text{C}$  NMR Spectrum of Compound (-)-**41** in  $\text{C}_6\text{D}_6$

S181

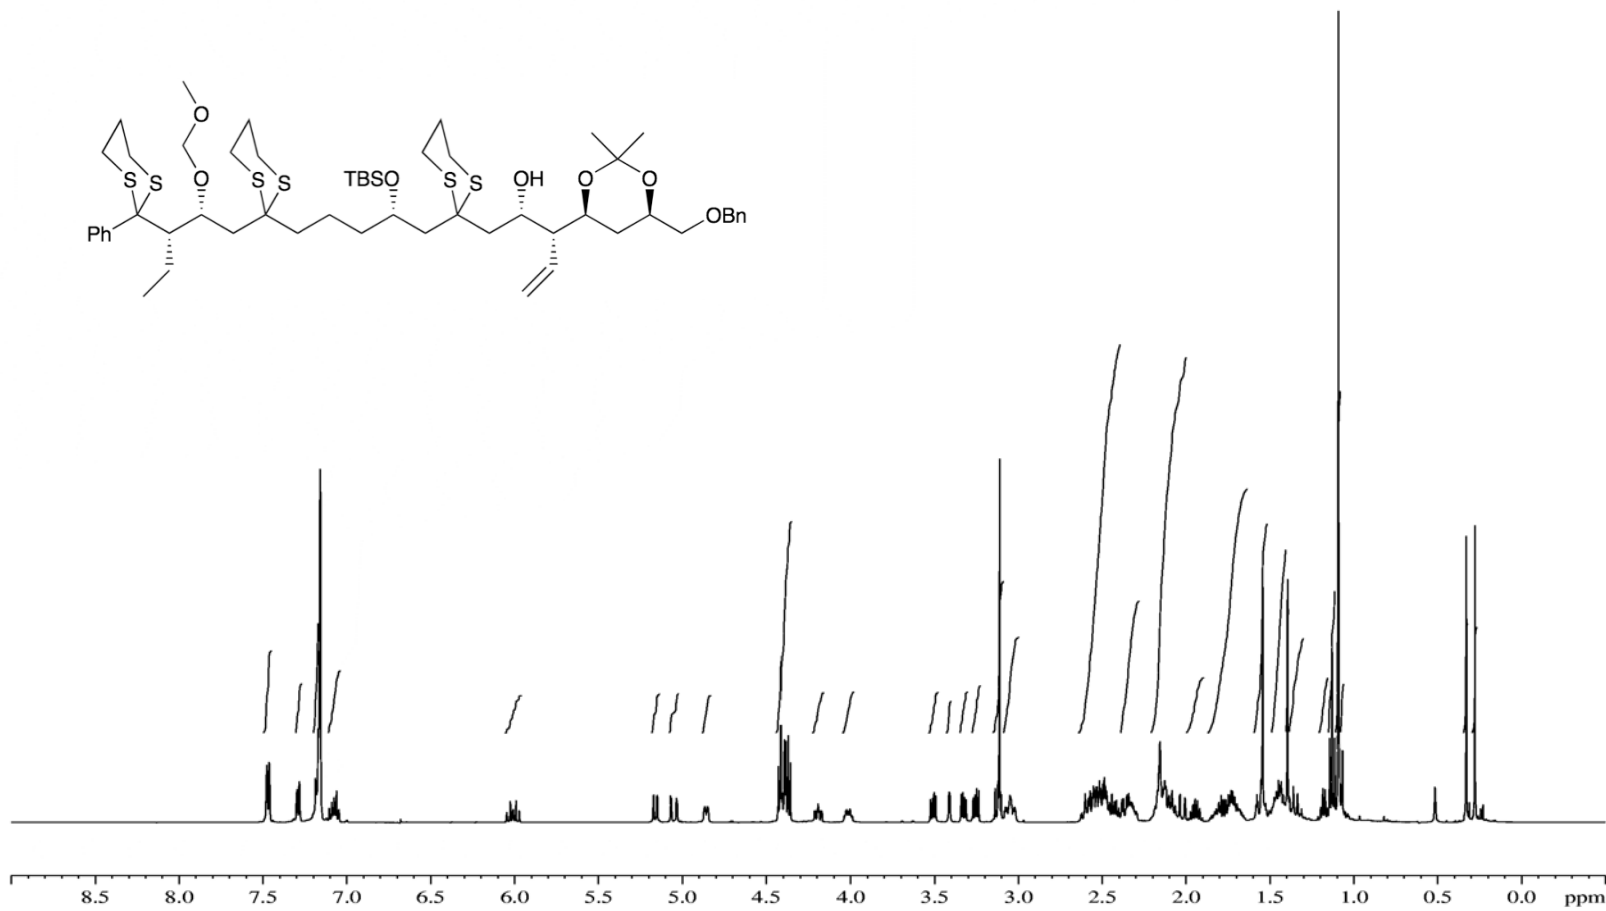

The <sup>1</sup>H NMR Spectrum of Compound (-)-42 in C<sub>6</sub>D<sub>6</sub>

S182

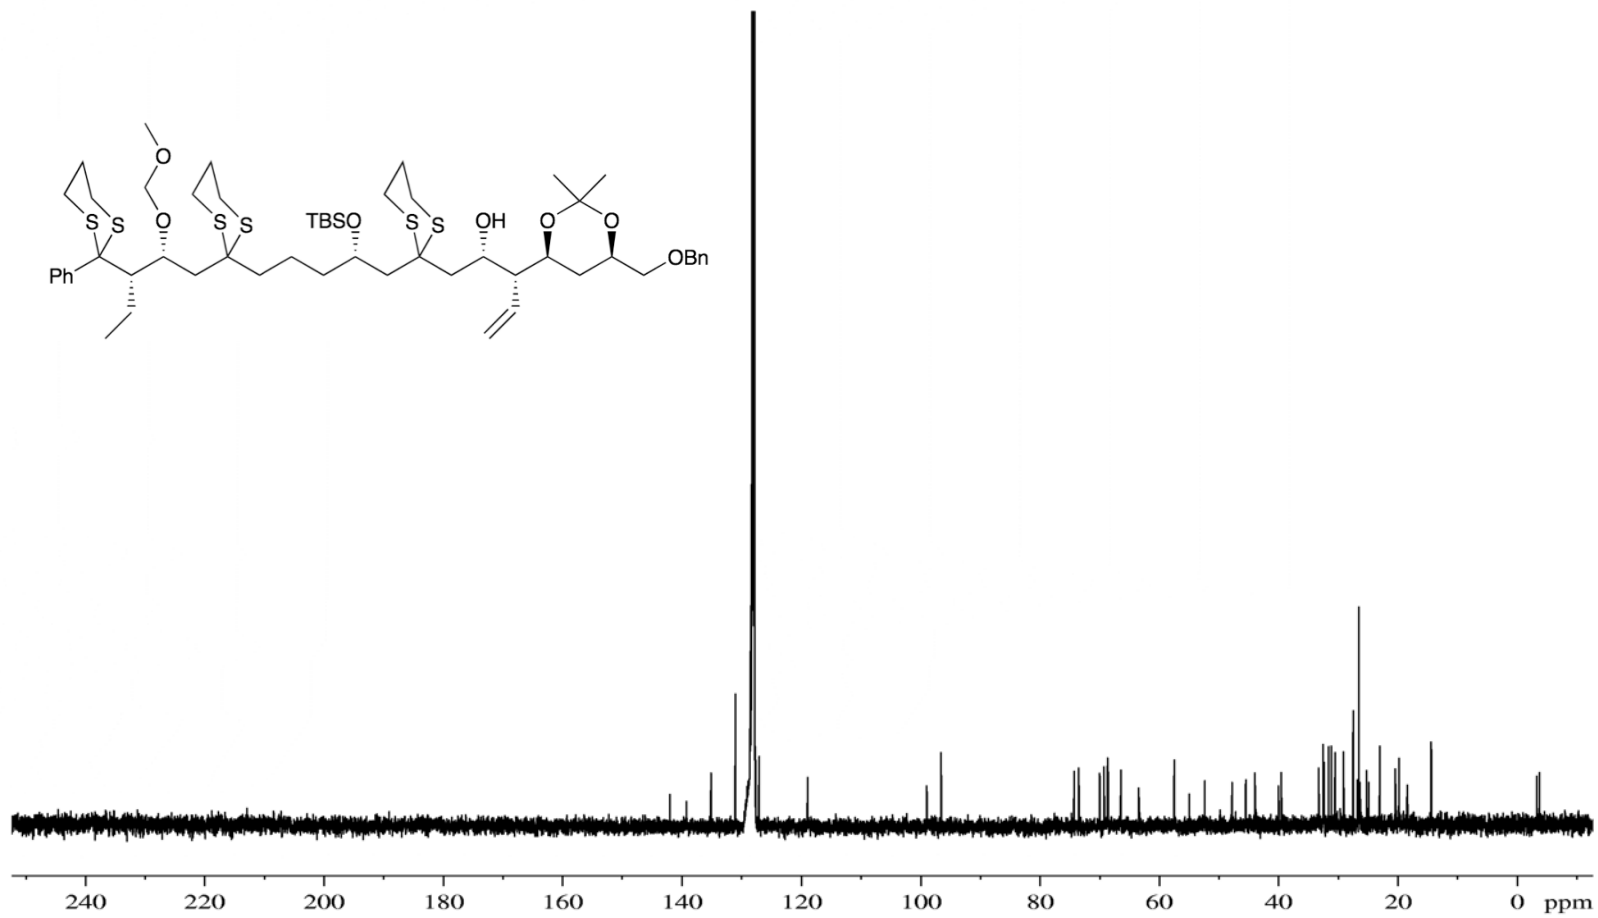

The  $^{13}\text{C}$  NMR Spectrum of Compound (-)-42 in  $\text{C}_6\text{D}_6$



S183

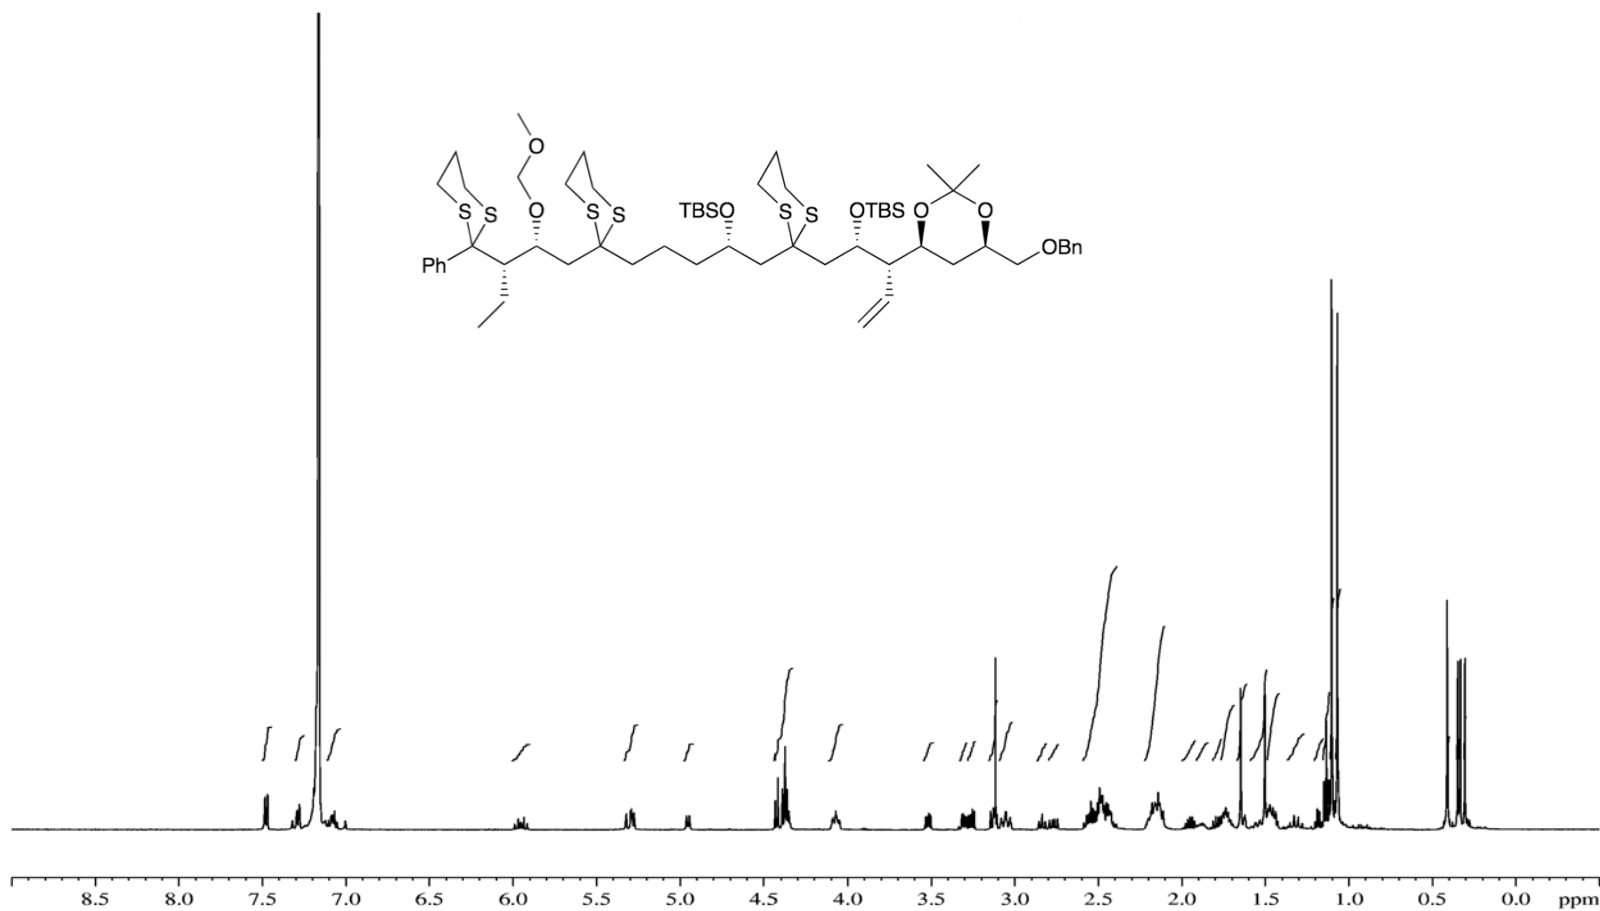

The <sup>1</sup>H NMR Spectrum of Compound (+)-43 in C<sub>6</sub>D<sub>6</sub>

S184

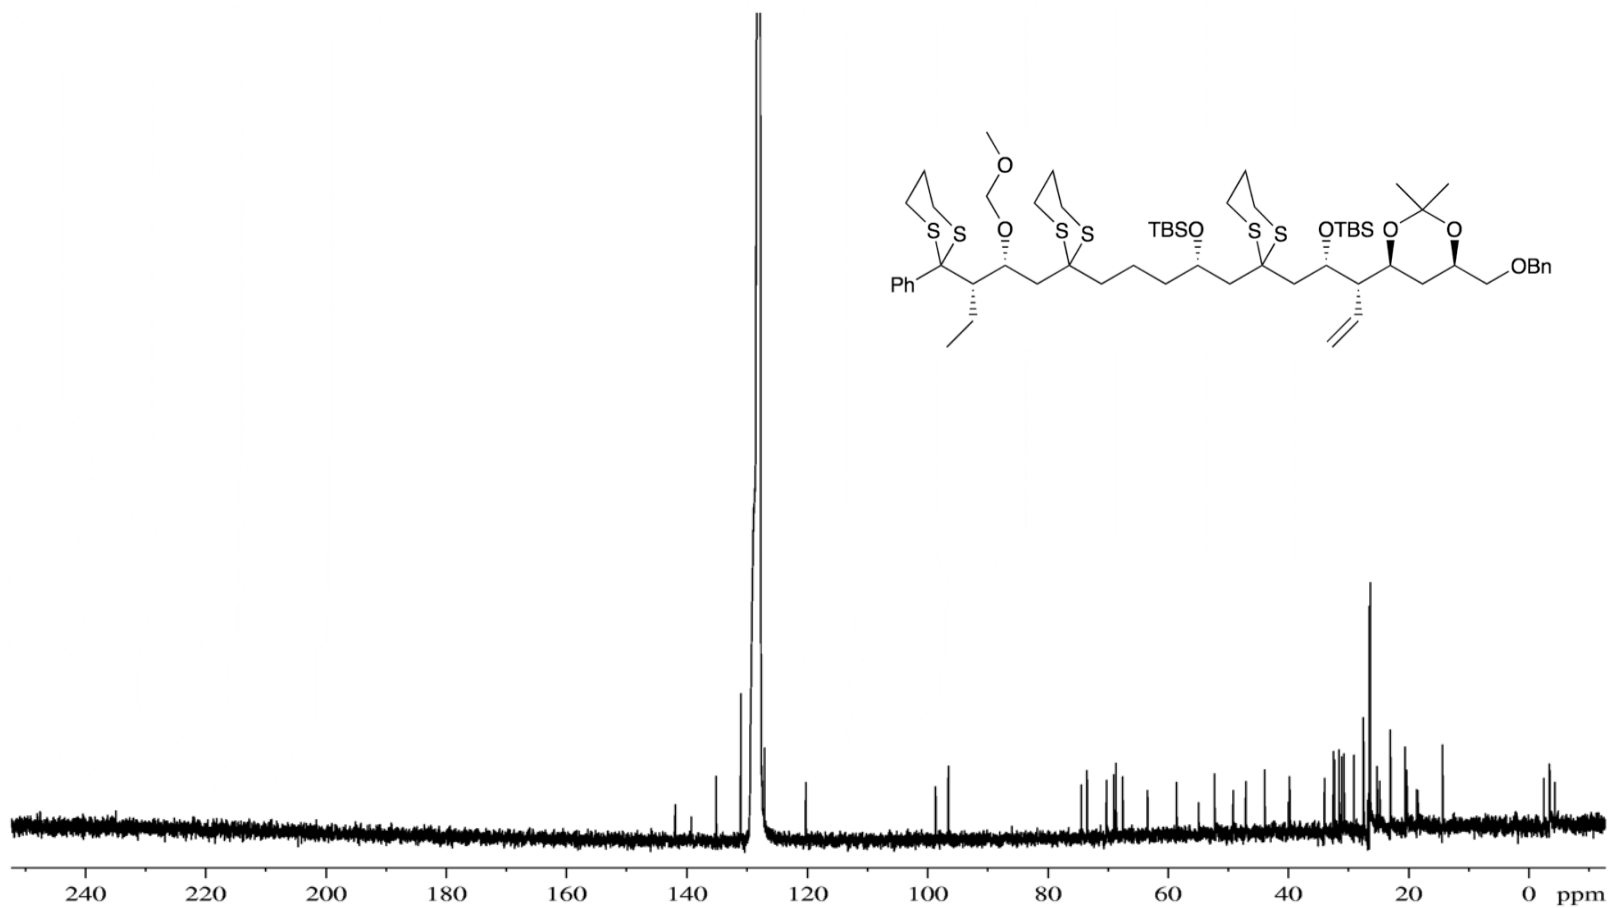

The  $^{13}\text{C}$  NMR Spectrum of Compound (+)-43 in  $\text{C}_6\text{D}_6$

S185

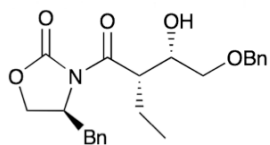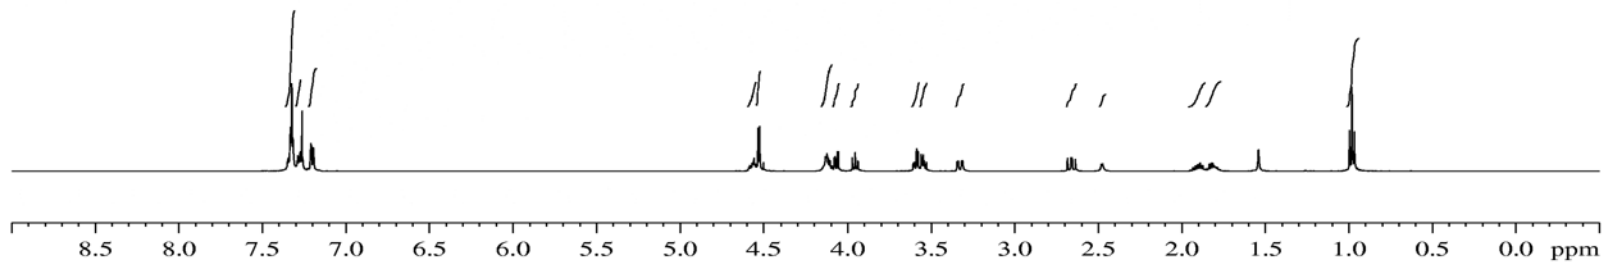

The <sup>1</sup>H NMR Spectrum of Compound (+)-48 in CDCl<sub>3</sub>

S186

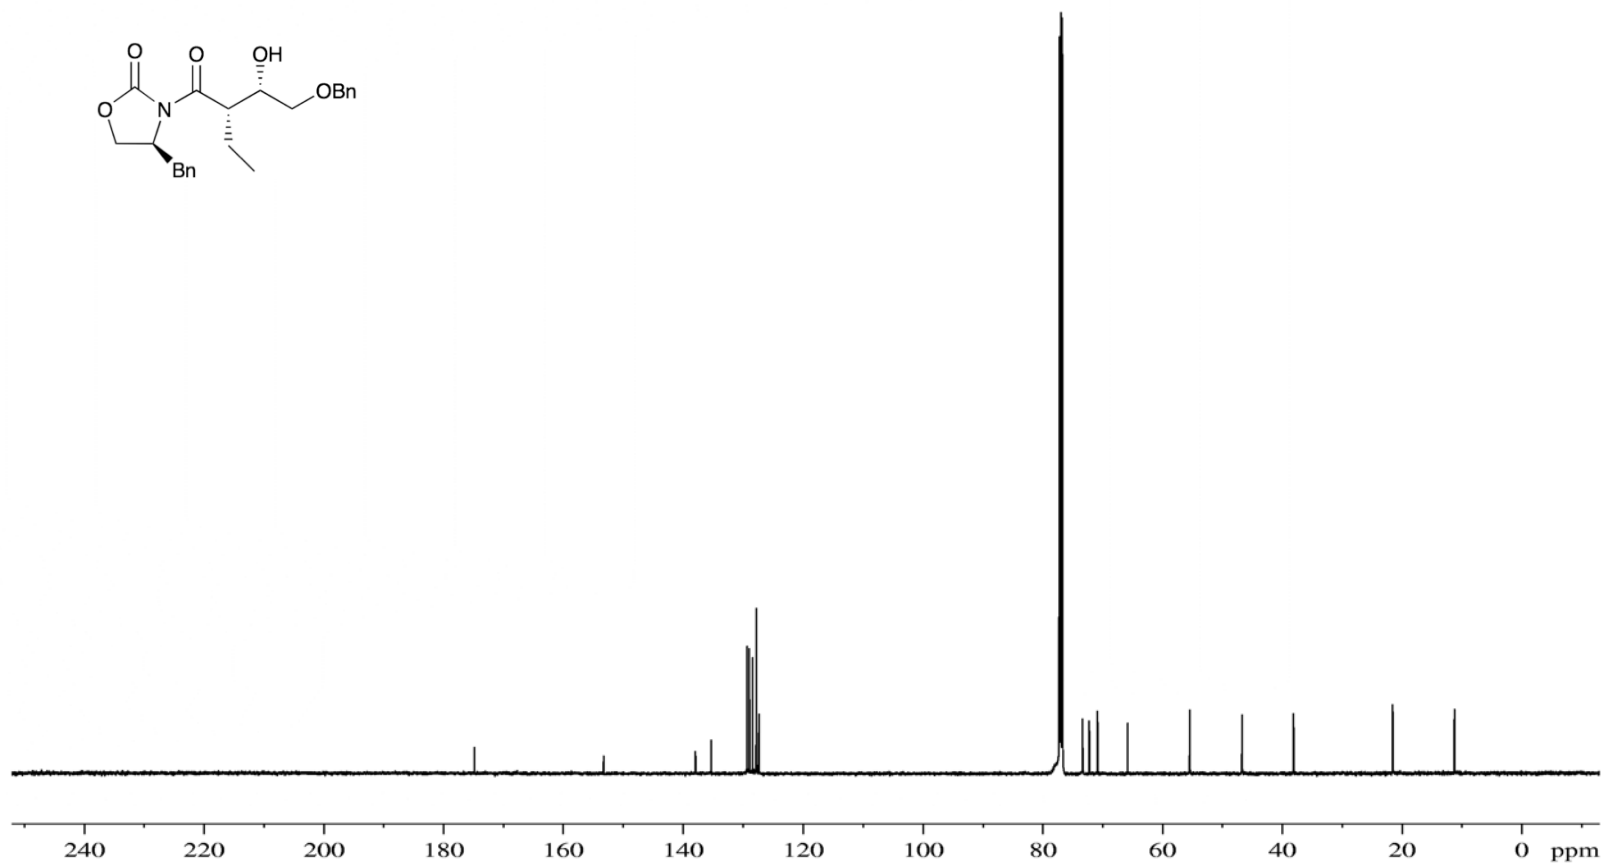

The <sup>13</sup>C NMR Spectrum of Compound (+)-48 in CDCl<sub>3</sub>

S187

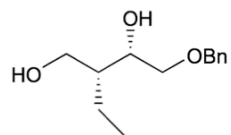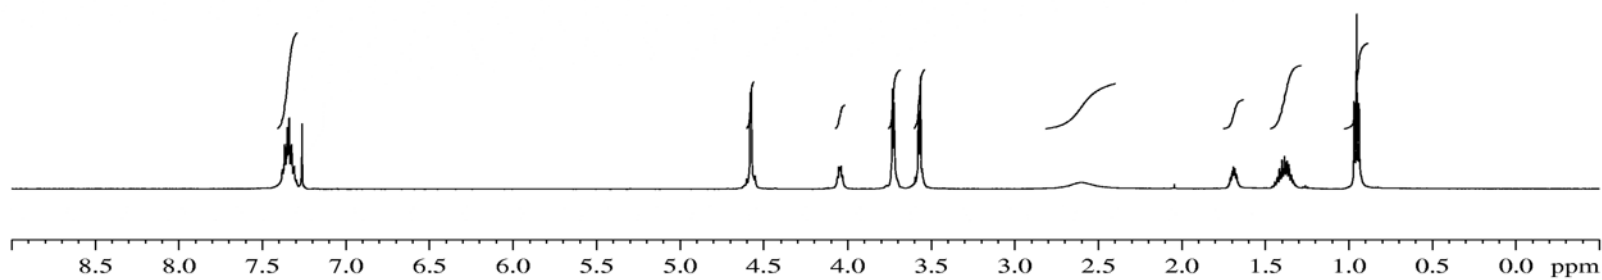

The <sup>1</sup>H NMR Spectrum of Compound (+)-**S16** in CDCl<sub>3</sub>

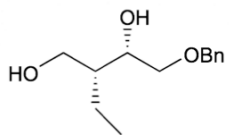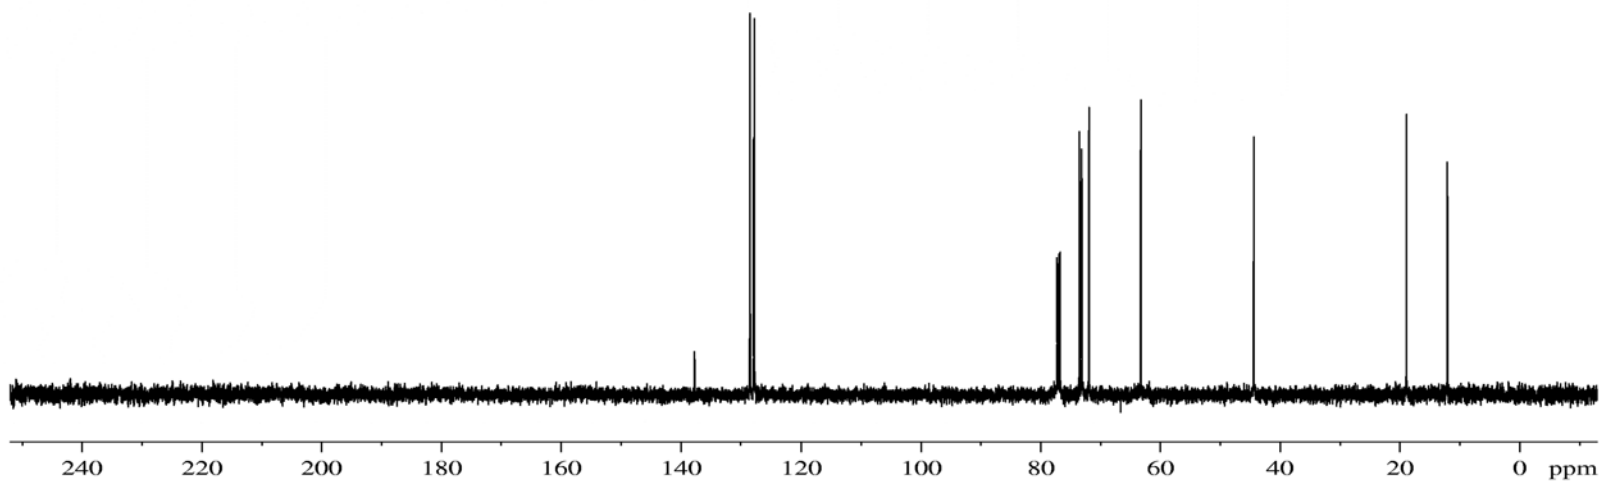

S188

The  $^{13}\text{C}$  NMR Spectrum of Compound (+)-S16 in  $\text{CDCl}_3$

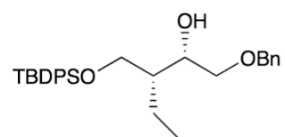

S189

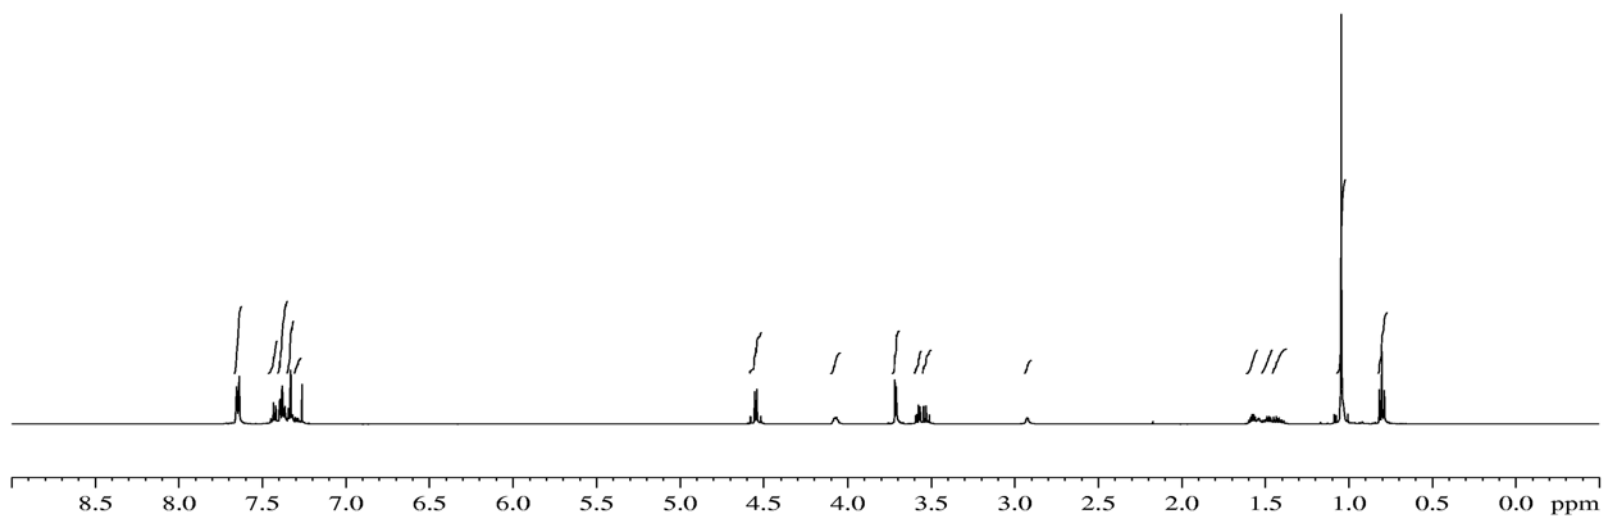

The <sup>1</sup>H NMR Spectrum of Compound (-)-49 in CDCl<sub>3</sub>

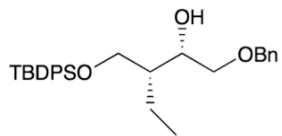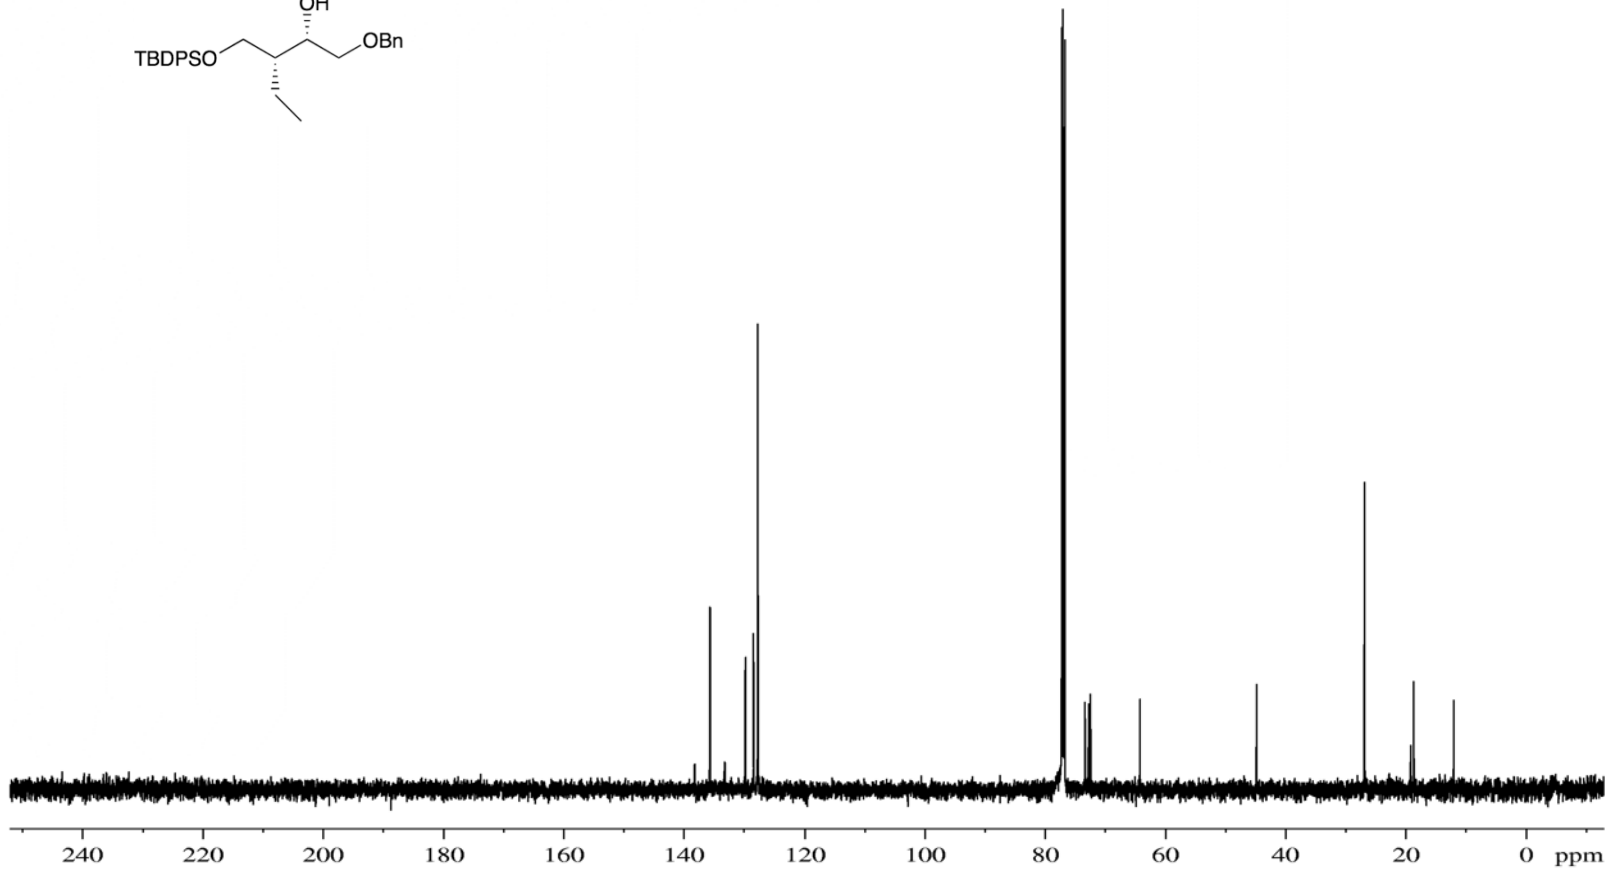

S190

The <sup>13</sup>C NMR Spectrum of Compound (-)-49 in CDCl<sub>3</sub>





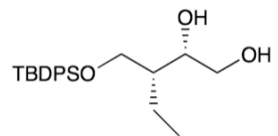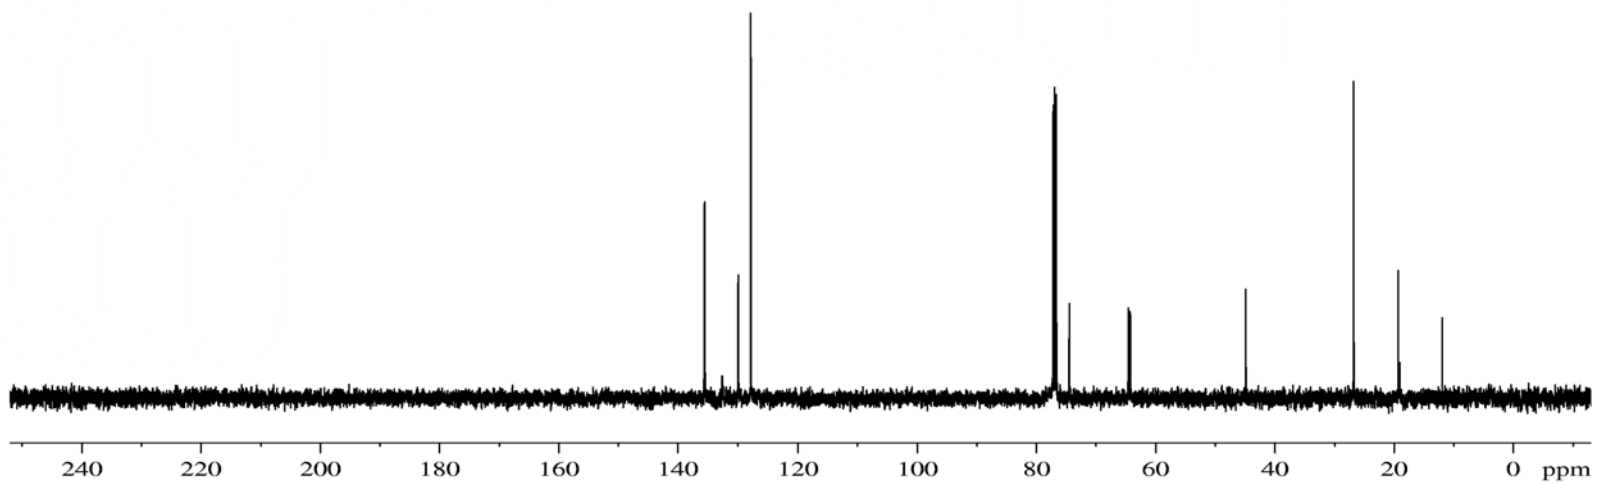

The  $^{13}\text{C}$  NMR Spectrum of Compound (-)-**S17** in  $\text{CDCl}_3$



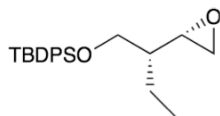

S194

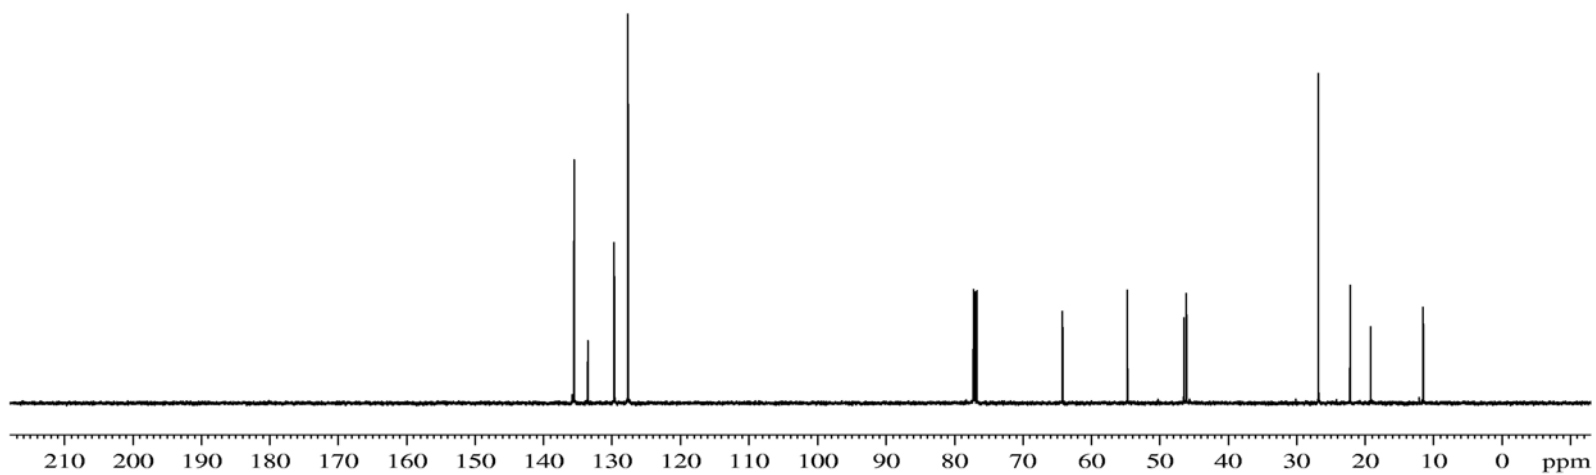

The  $^{13}\text{C}$  NMR Spectrum of Compound (+)-45 in  $\text{CDCl}_3$

S195

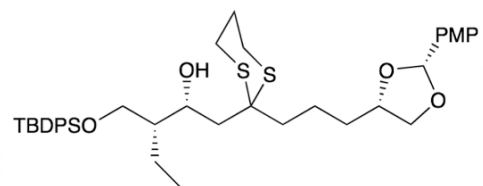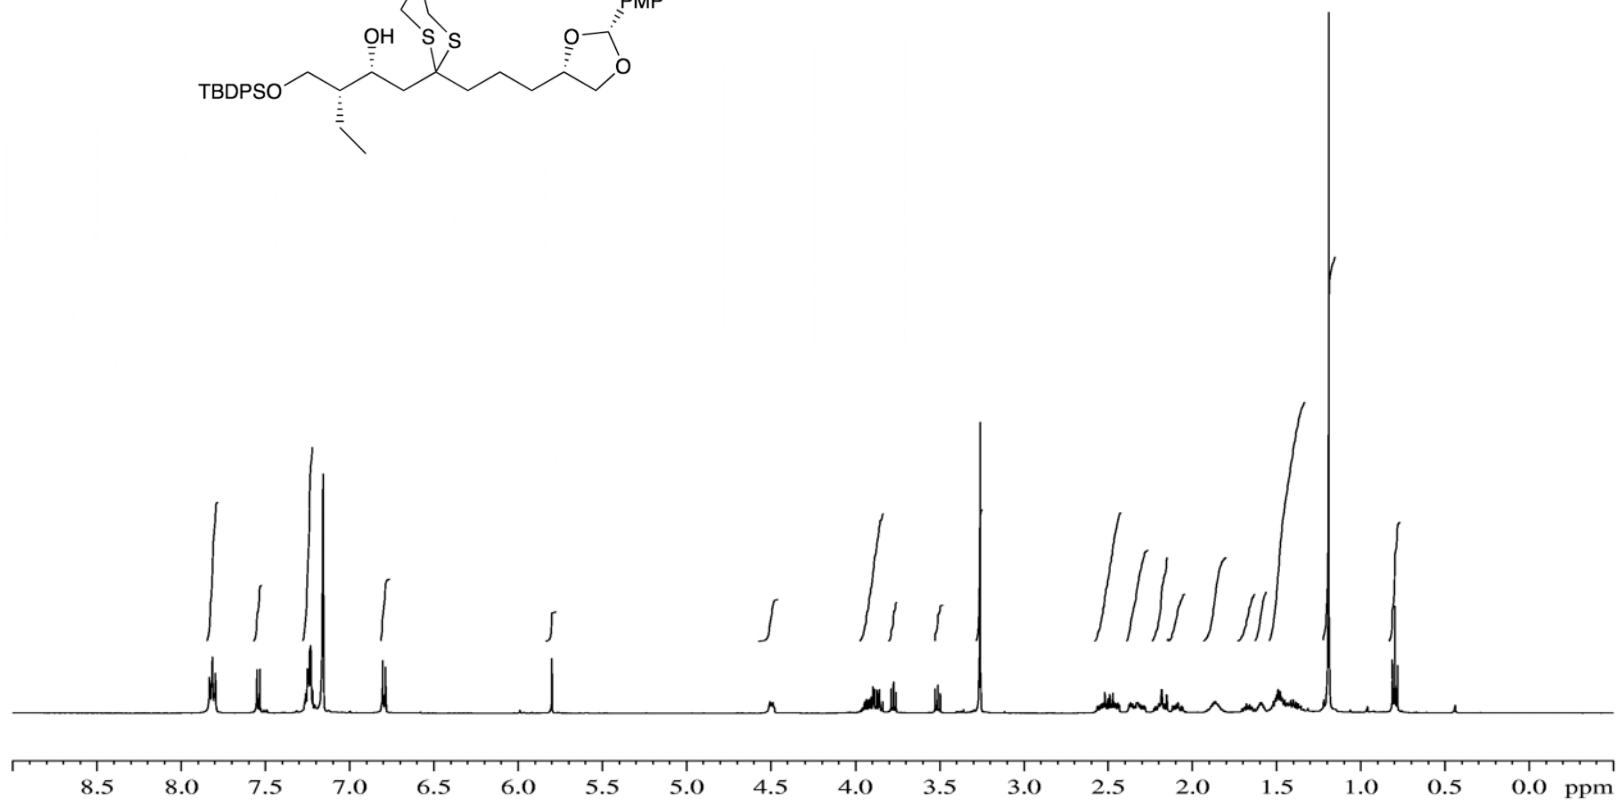

The <sup>1</sup>H NMR Spectrum of Compound (-)-**50** in C<sub>6</sub>D<sub>6</sub>

S196

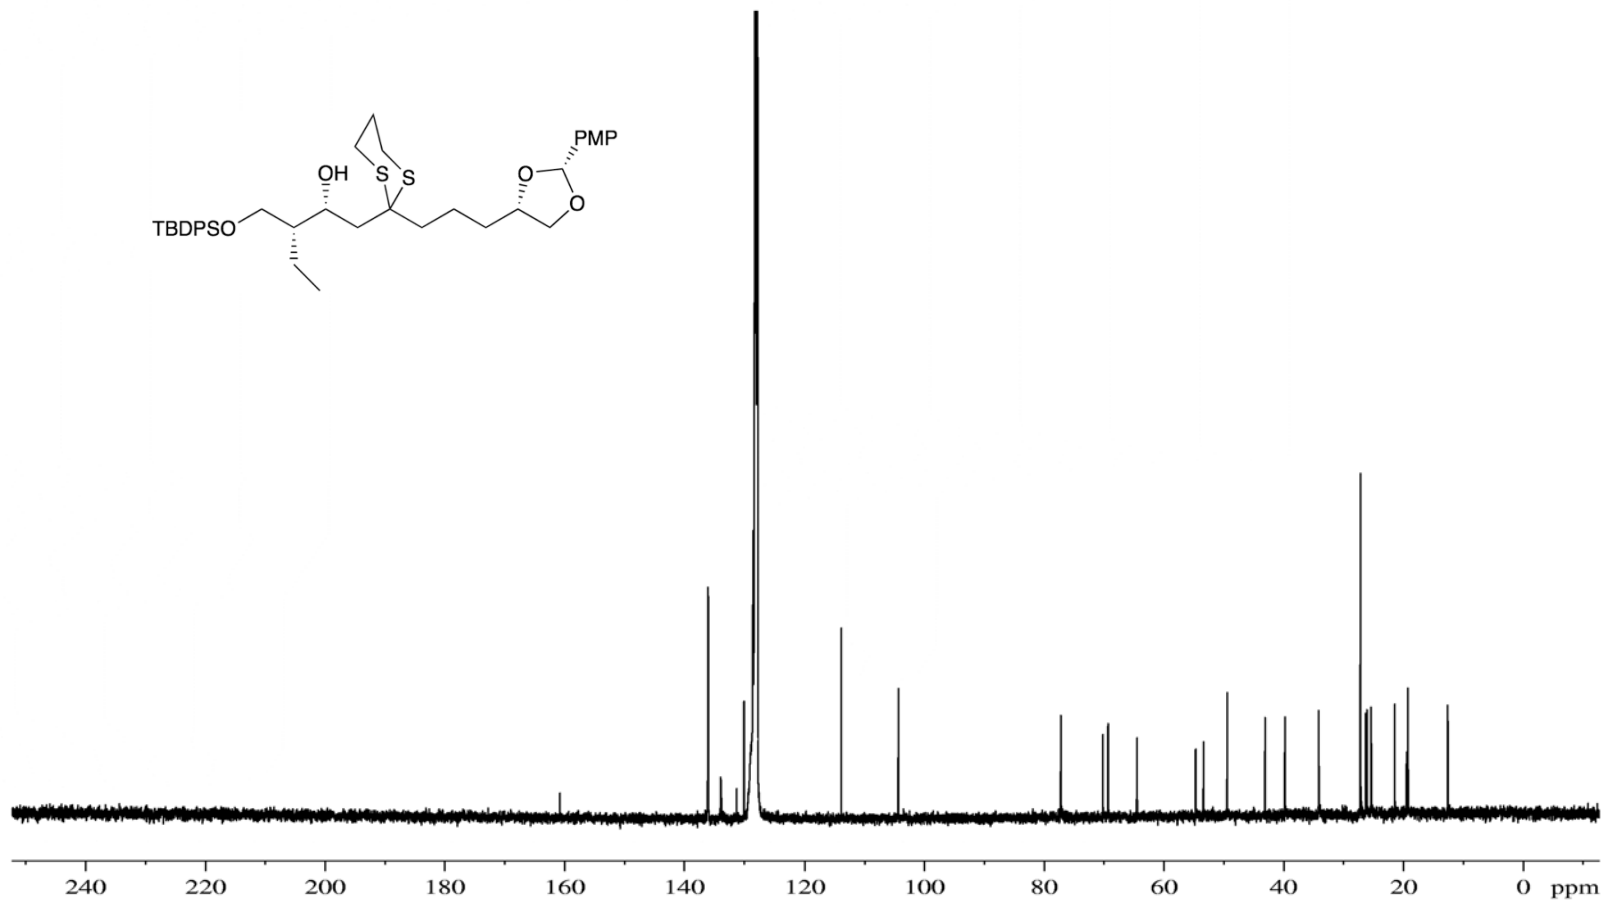

The  $^{13}\text{C}$  NMR Spectrum of Compound (-)-50 in  $\text{C}_6\text{D}_6$

S197

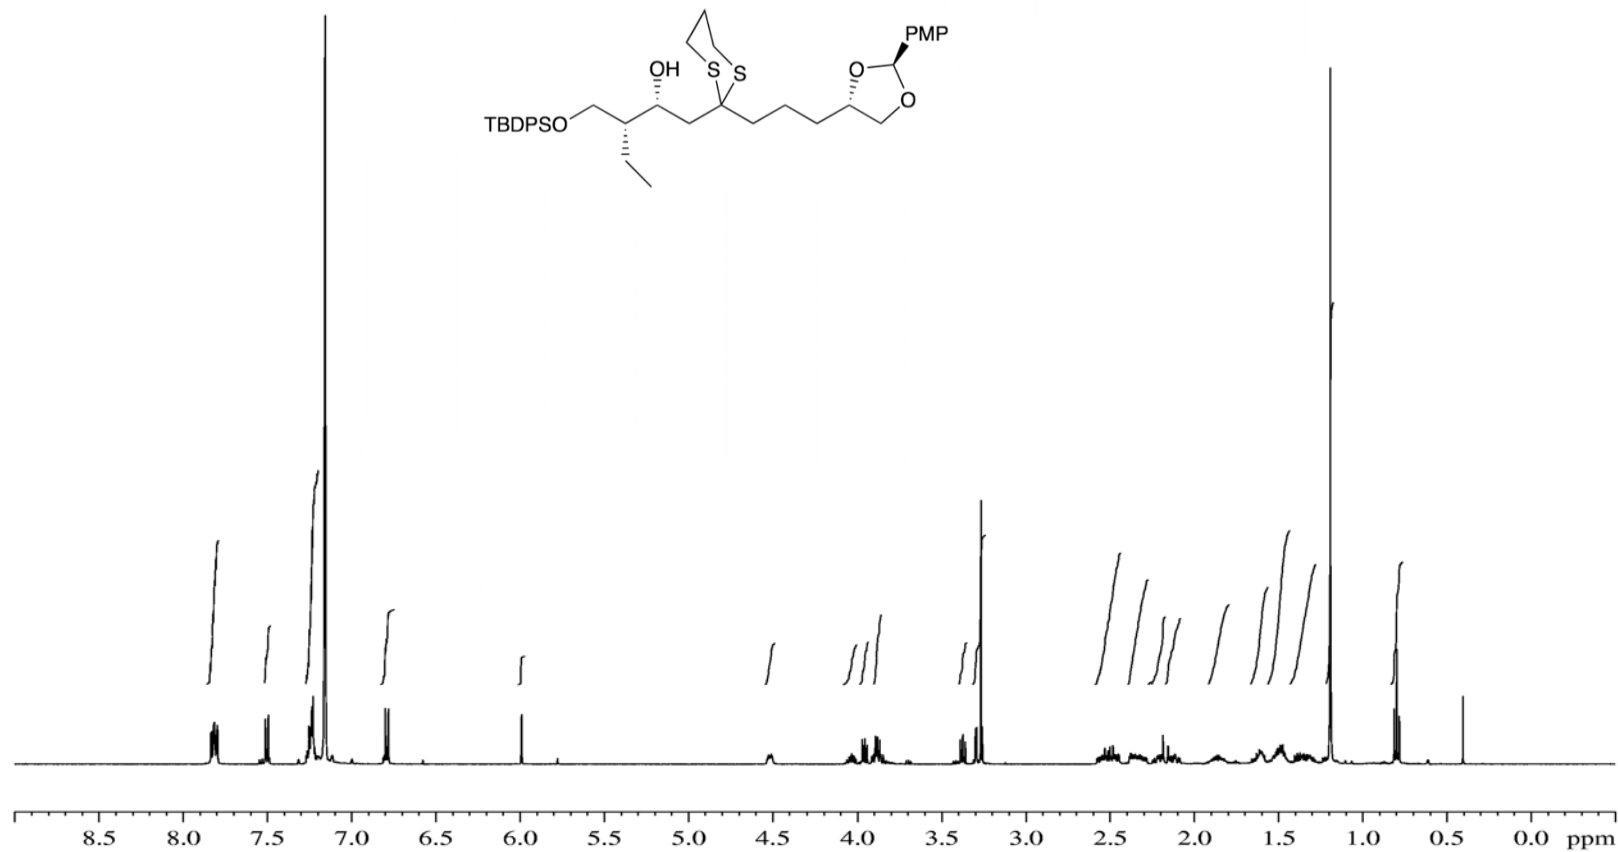

The <sup>1</sup>H NMR Spectrum of the Minor Diastereomer in C<sub>6</sub>D<sub>6</sub>

861S

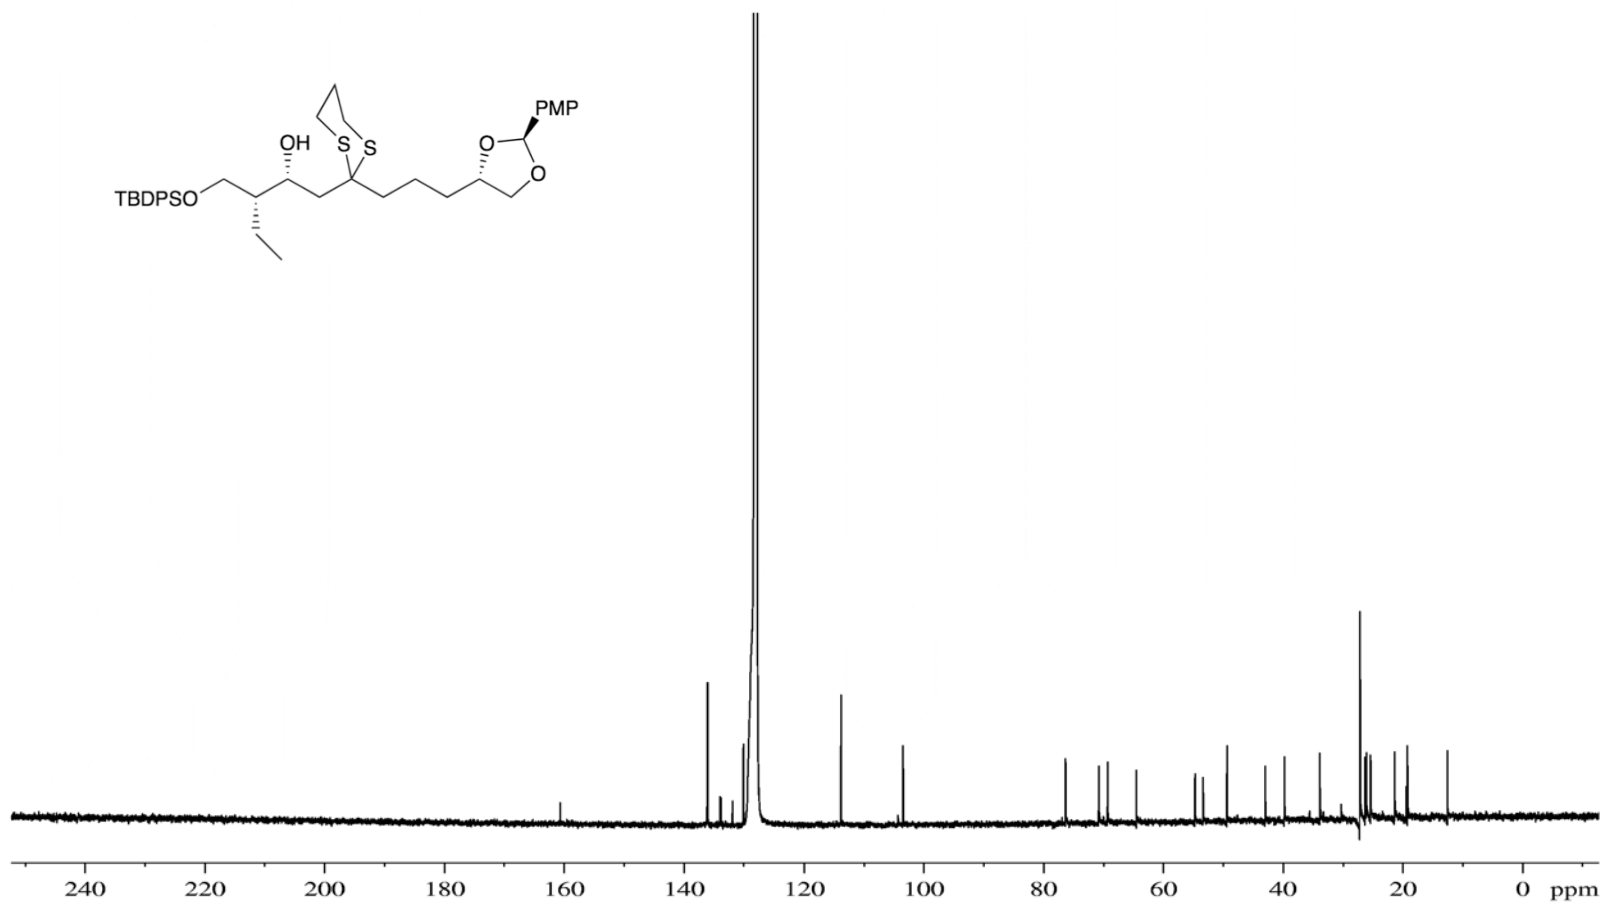

The <sup>13</sup>C NMR Spectrum of the Minor Diastereomer in C<sub>6</sub>D<sub>6</sub>



S199

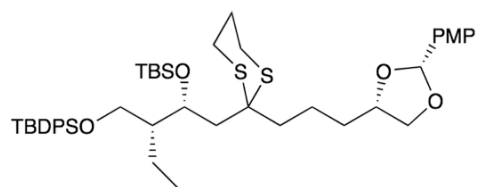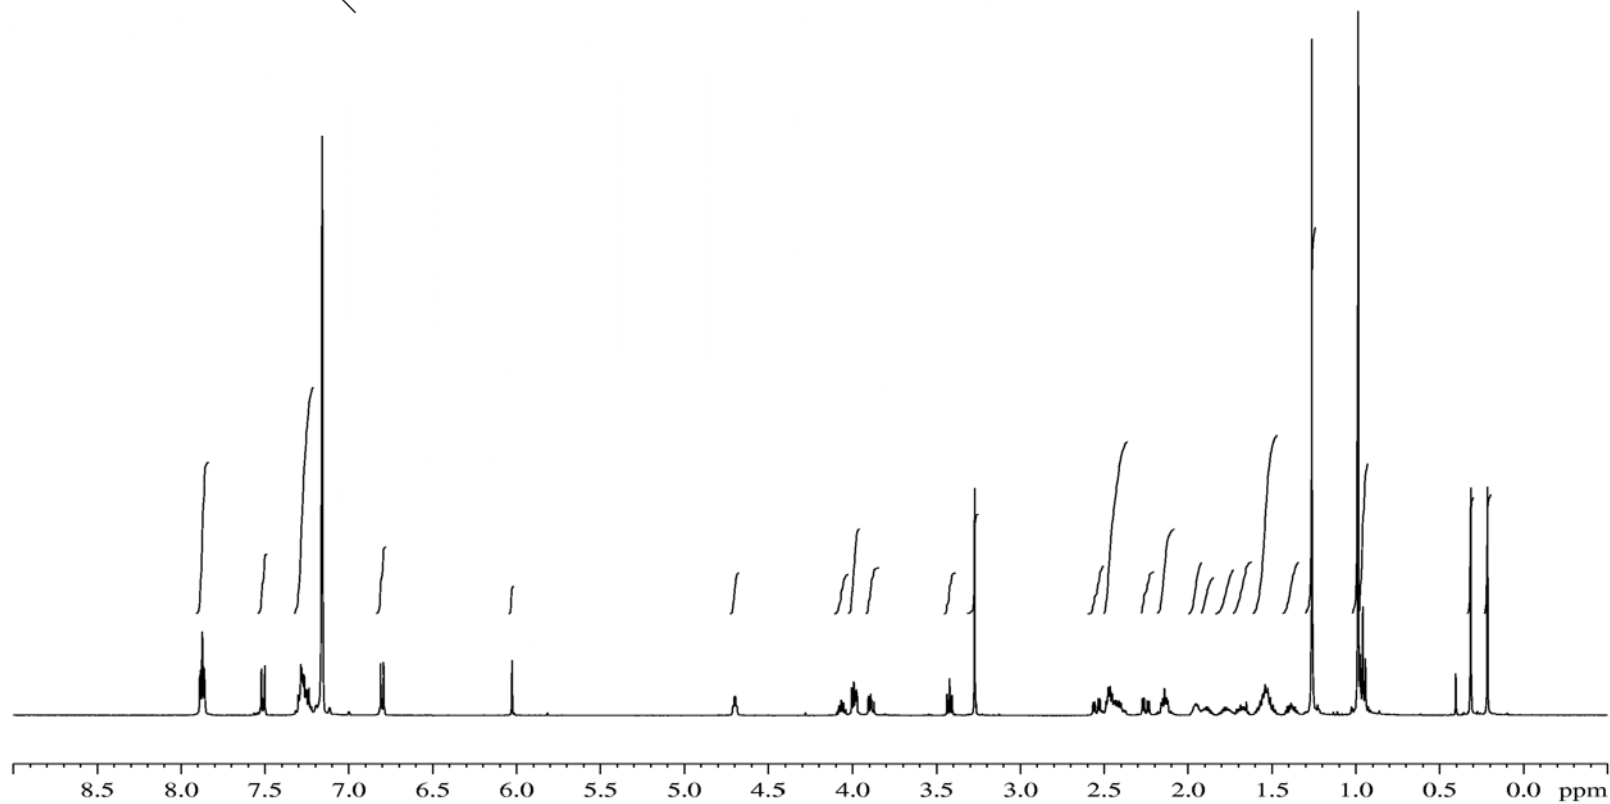

The <sup>1</sup>H NMR Spectrum of Compound (-)-**51** in C<sub>6</sub>D<sub>6</sub>

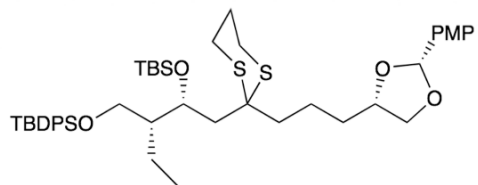

S200

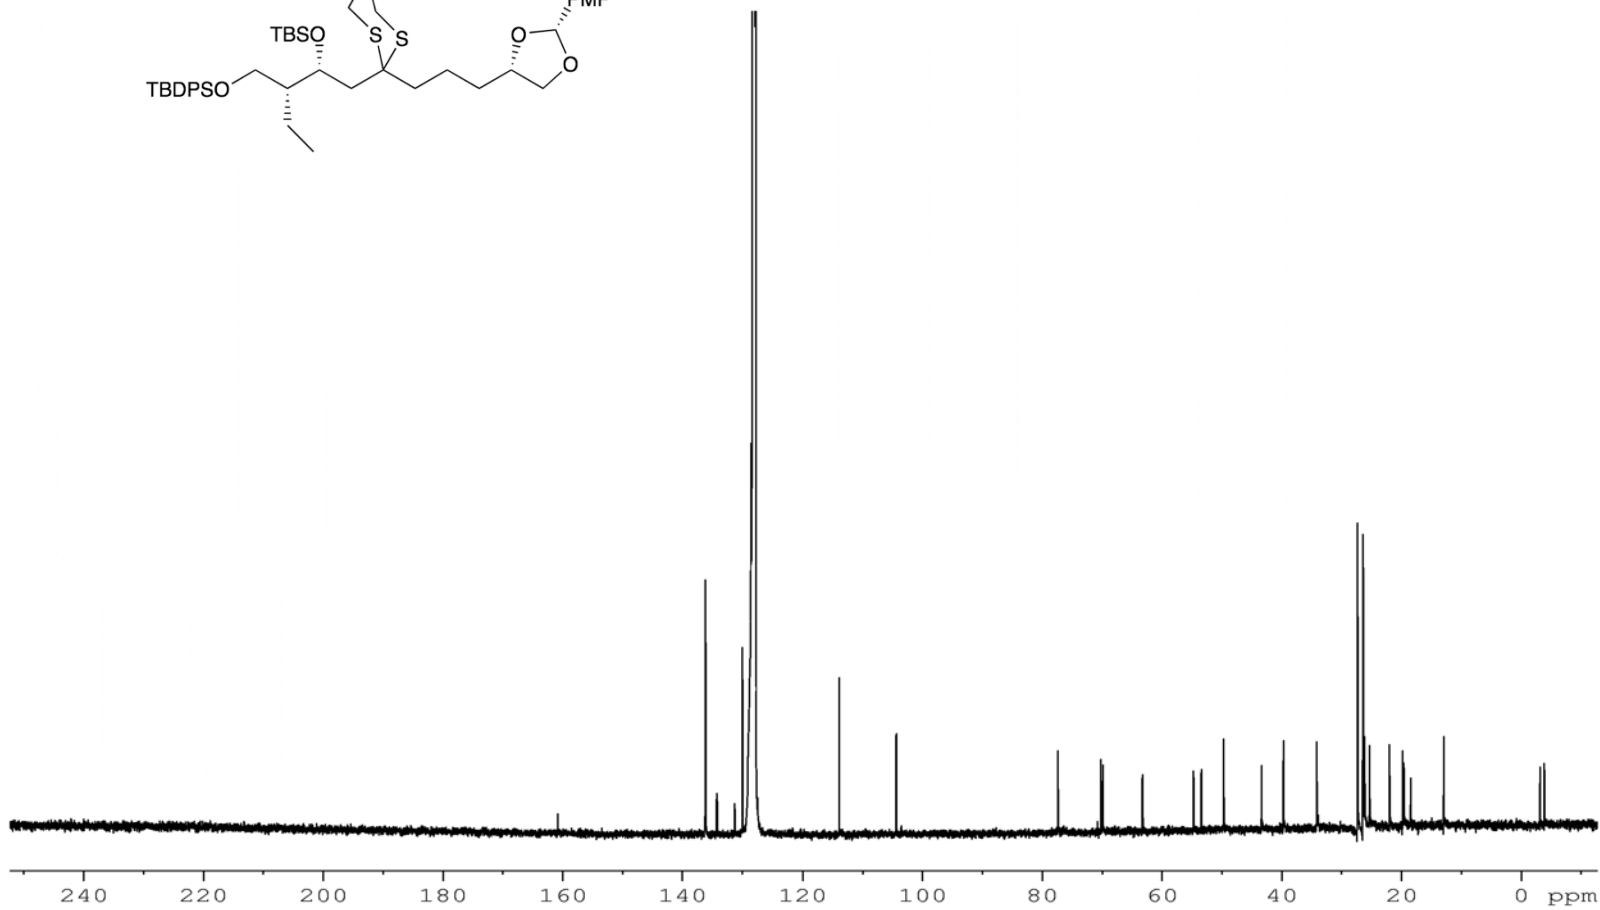

The  $^{13}\text{C}$  NMR Spectrum of Compound (-)-51 in  $\text{C}_6\text{D}_6$

S201

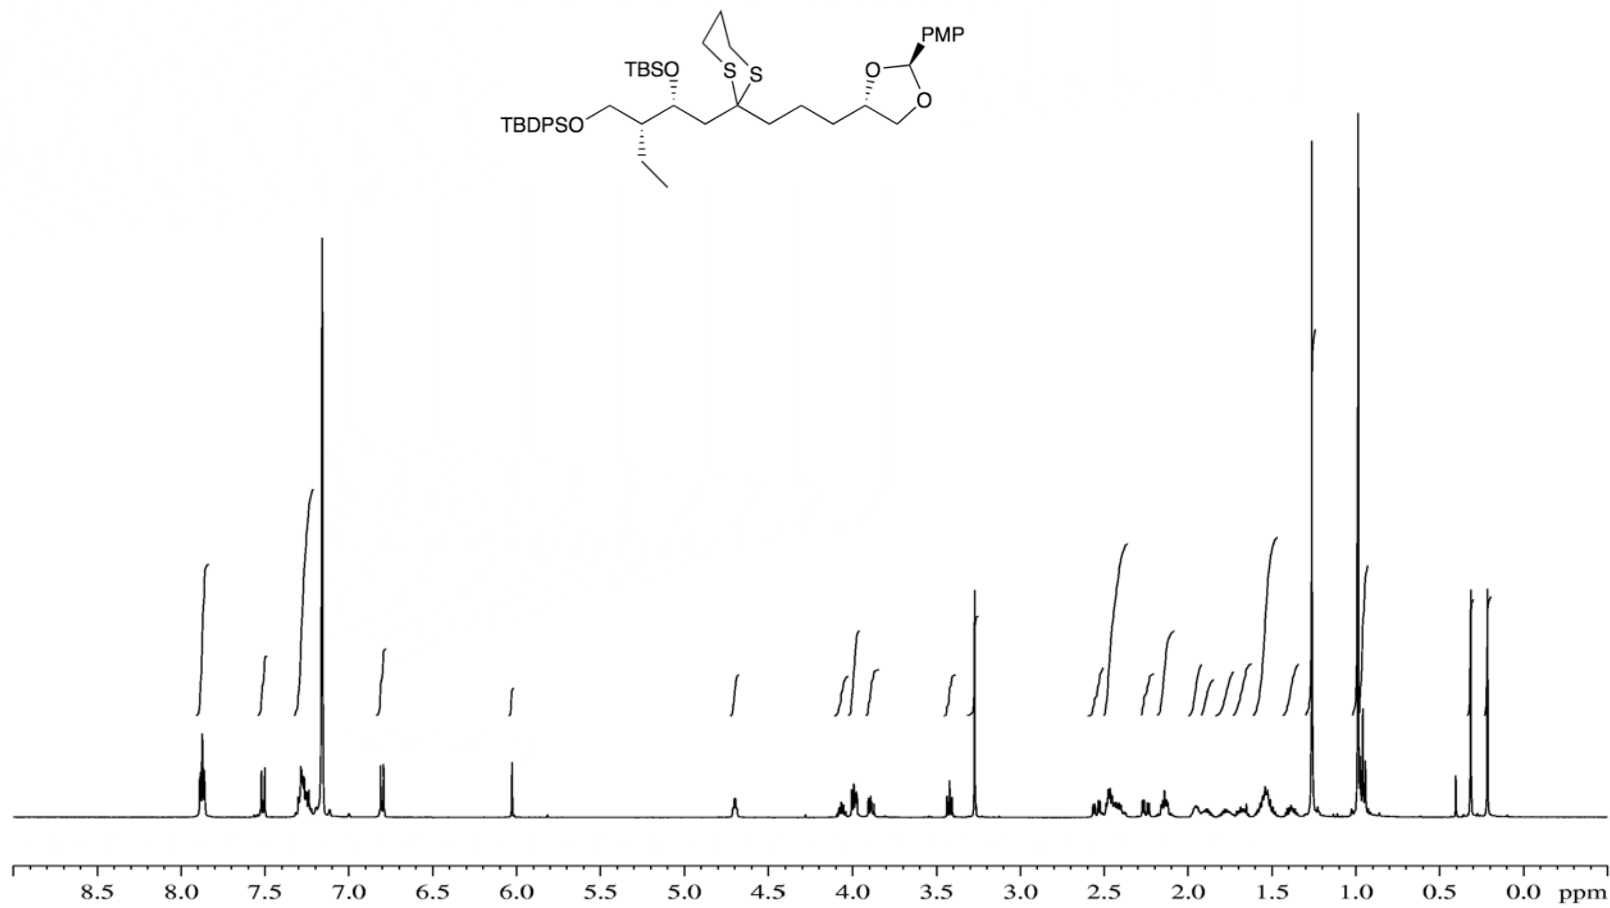

The <sup>1</sup>H NMR Spectrum of Compound (+)-**S18** in C<sub>6</sub>D<sub>6</sub>

S202

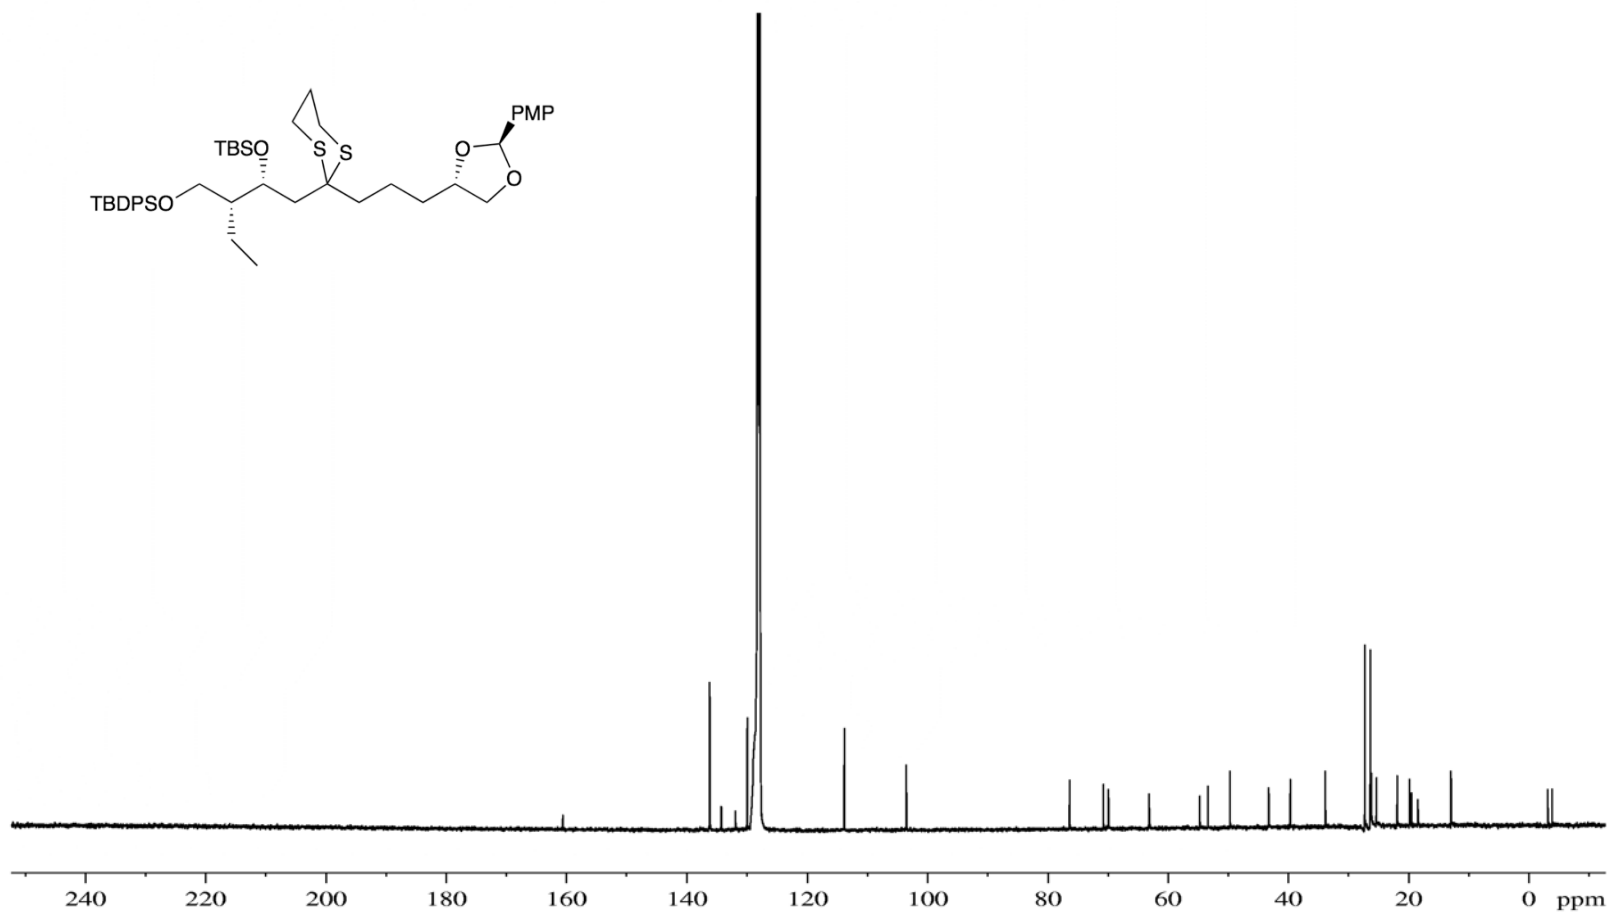

The <sup>13</sup>C NMR Spectrum of Compound (+)-**S18** in C<sub>6</sub>D<sub>6</sub>

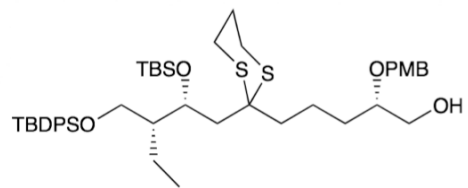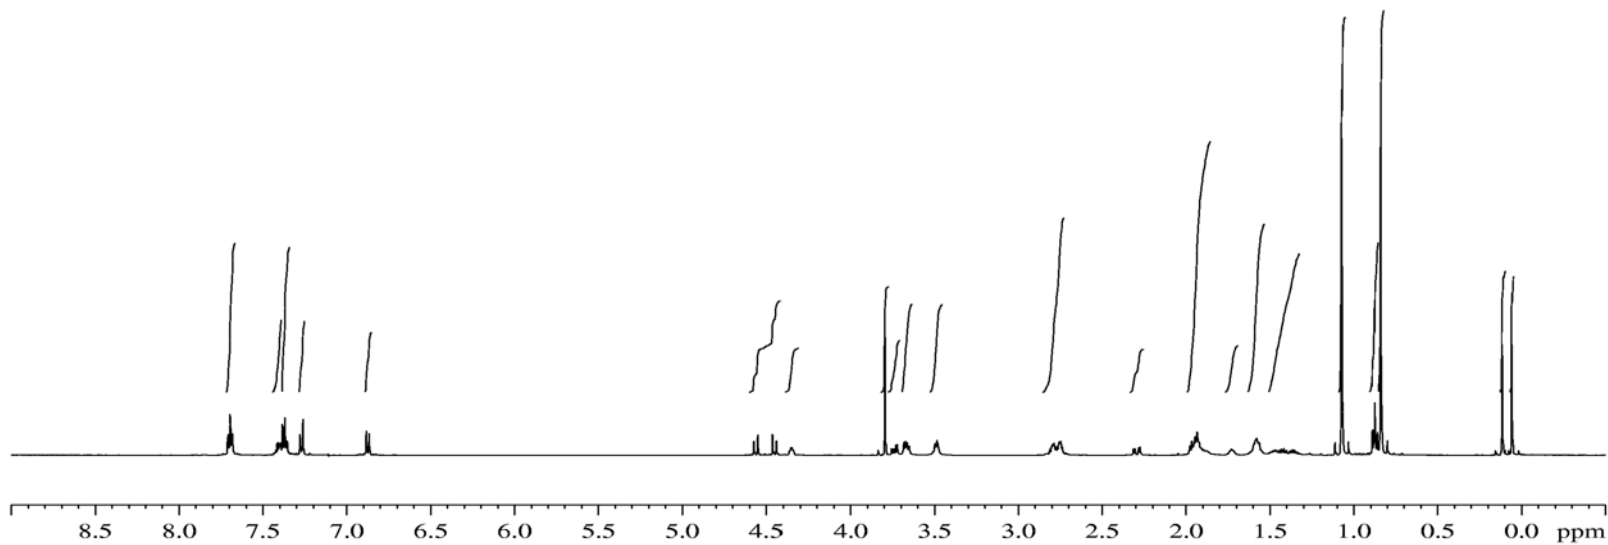

The <sup>1</sup>H NMR Spectrum of Compound (+)-S19 in CDCl<sub>3</sub>

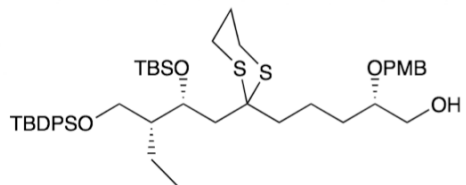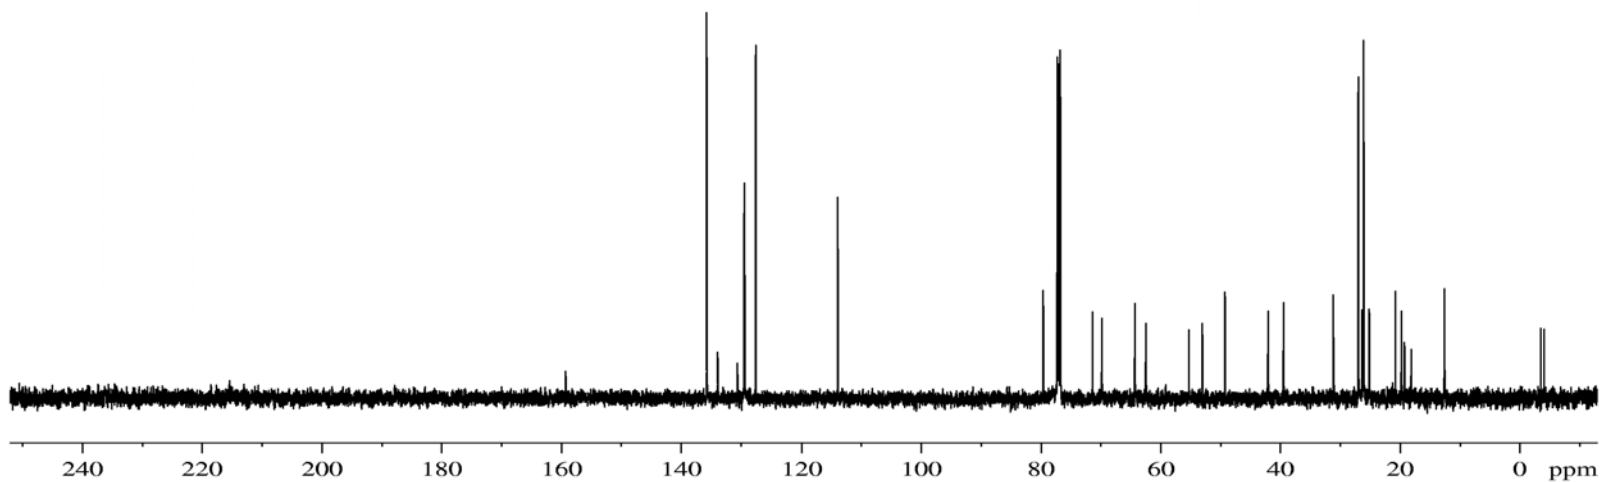

S204

The <sup>13</sup>C NMR Spectrum of Compound (+)-**S19** in CDCl<sub>3</sub>

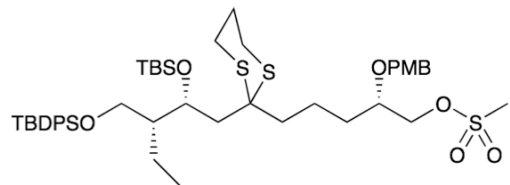

S205

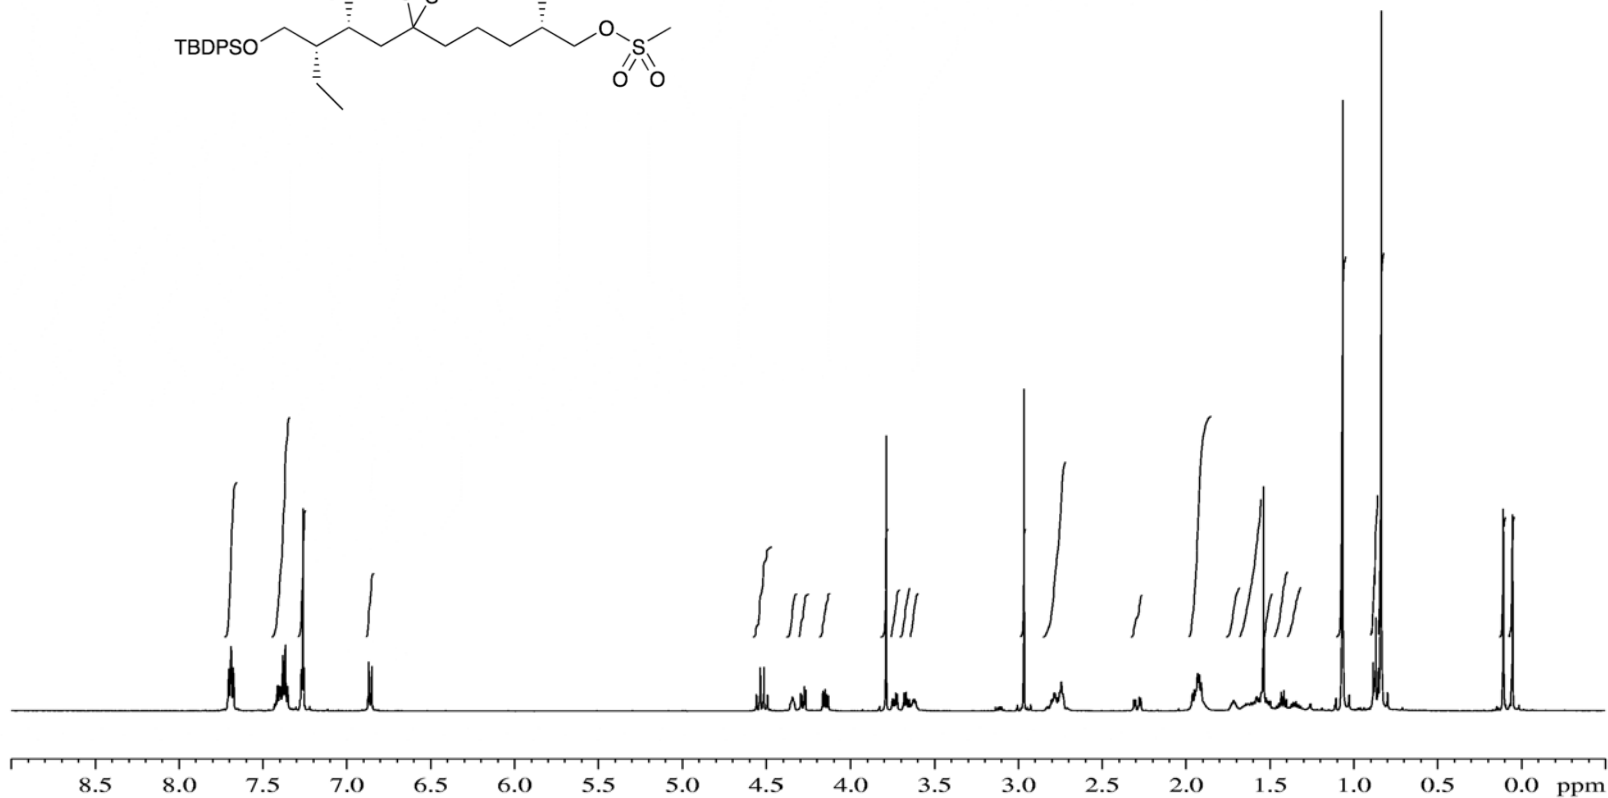

The <sup>1</sup>H NMR Spectrum of Compound (+)-S20 in CDCl<sub>3</sub>

S206

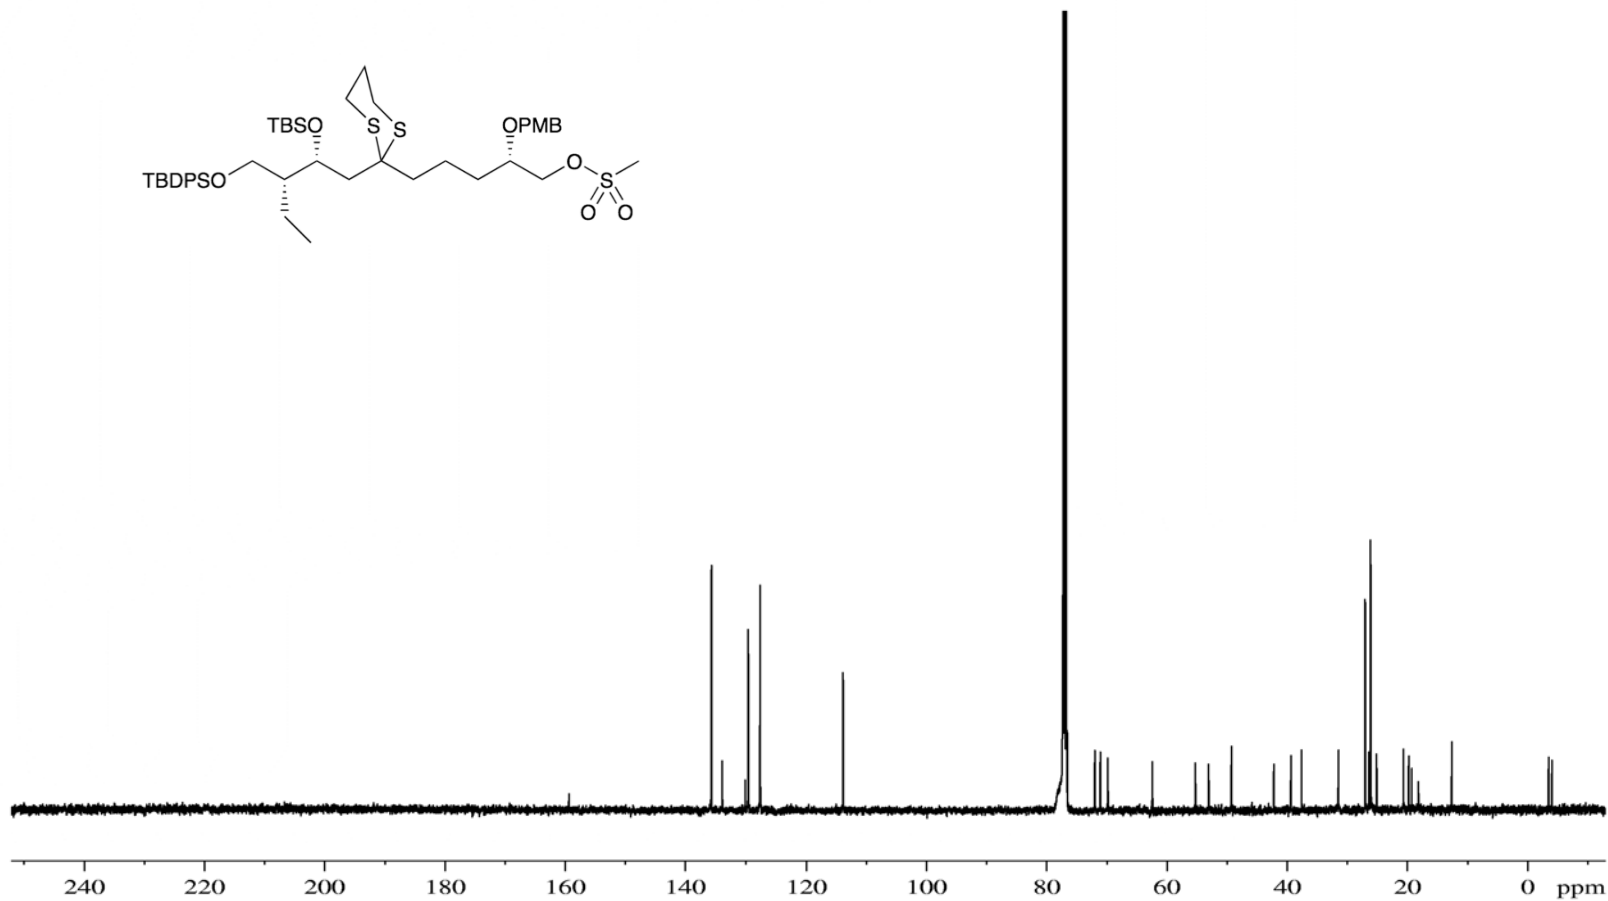

The  $^{13}\text{C}$  NMR Spectrum of Compound (+)-S20 in  $\text{CDCl}_3$



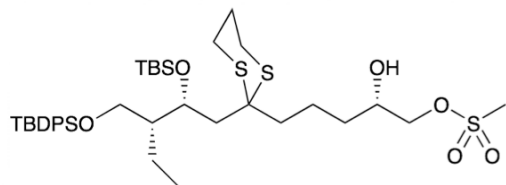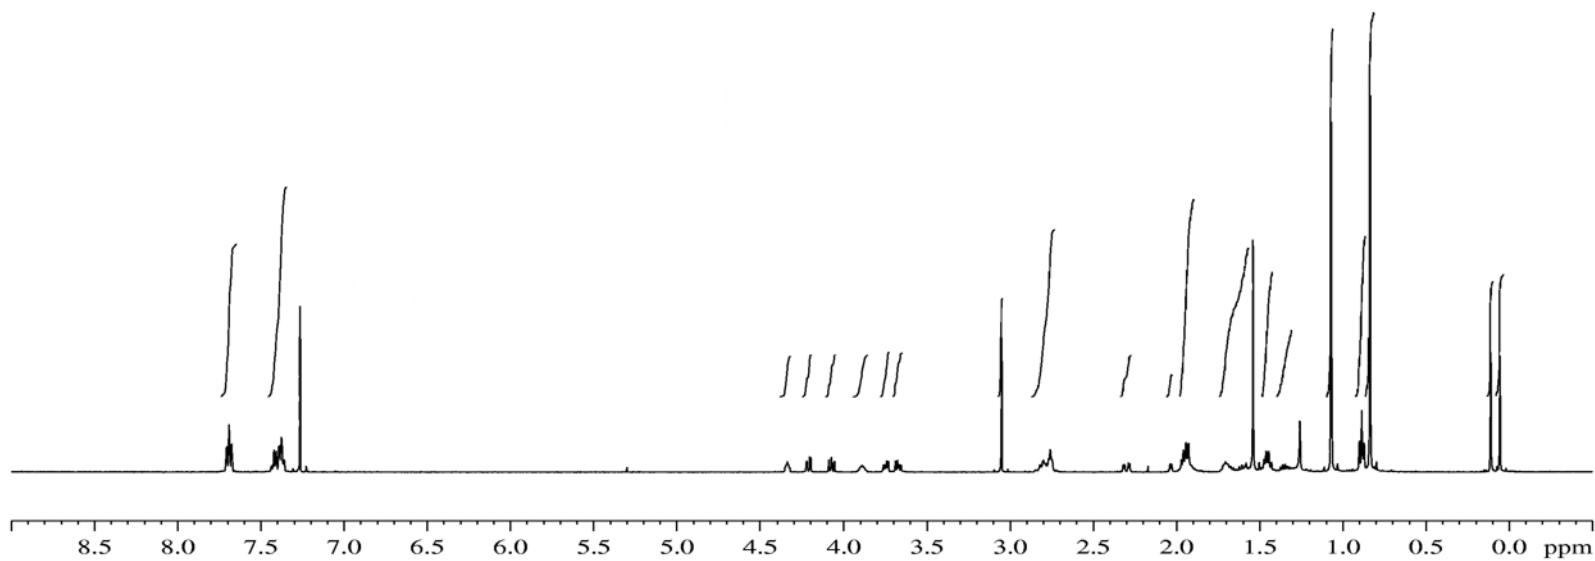

The <sup>1</sup>H NMR Spectrum of Compound (-)-S21 in CDCl<sub>3</sub>

S208

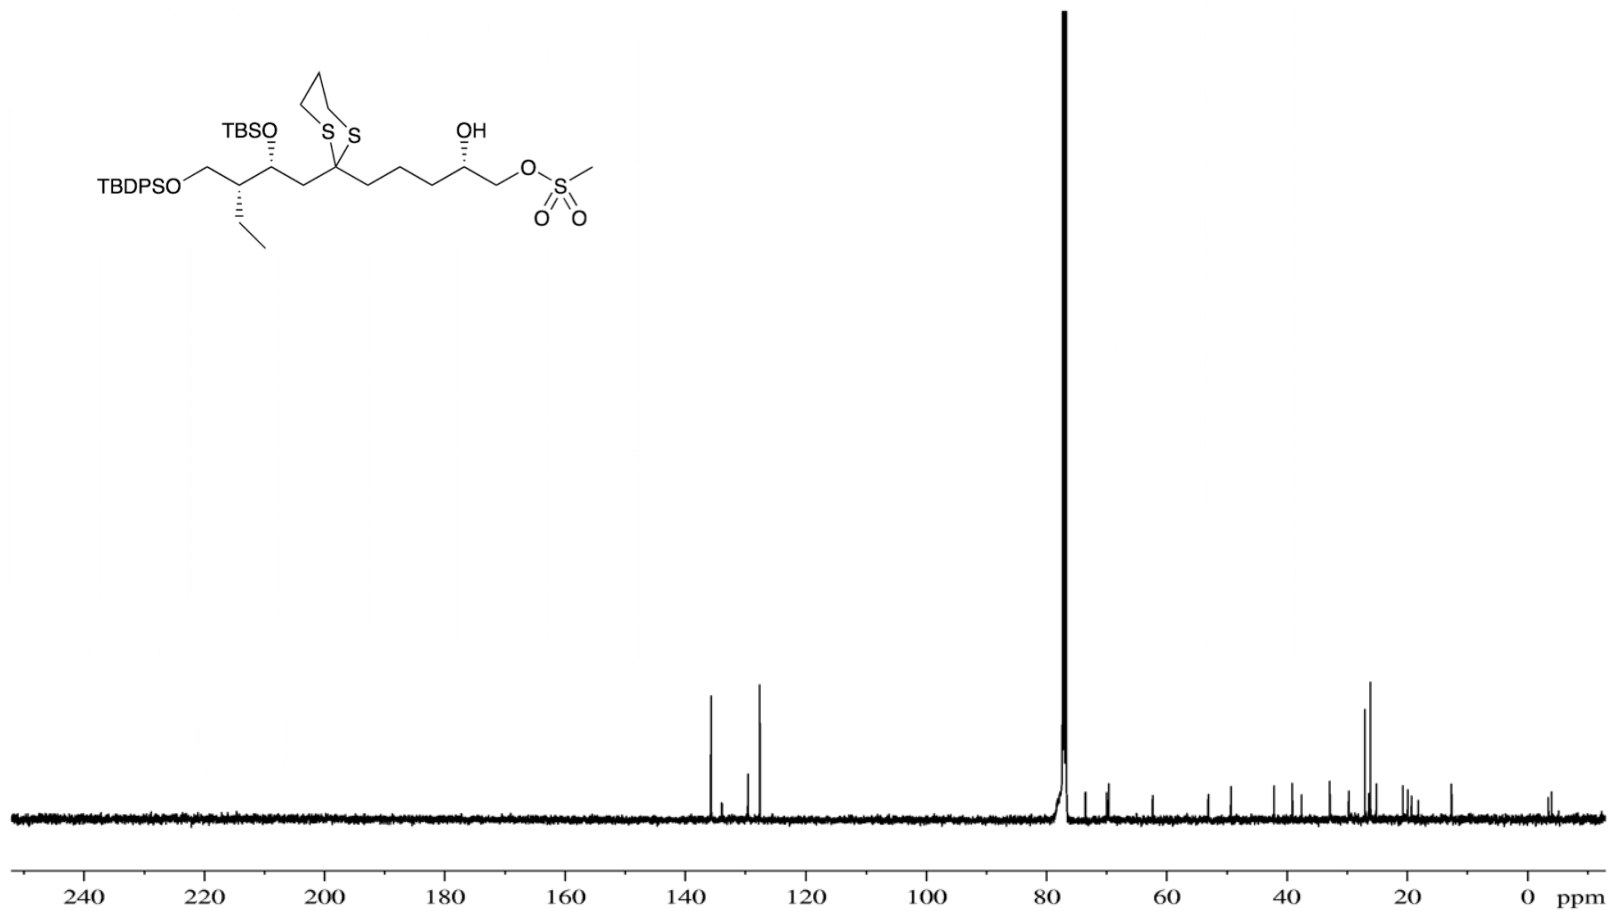

The  $^{13}\text{C}$  NMR Spectrum of Compound (-)-S21 in  $\text{CDCl}_3$

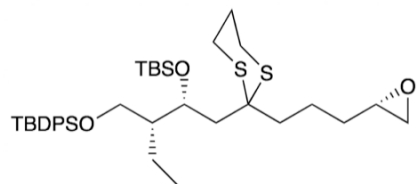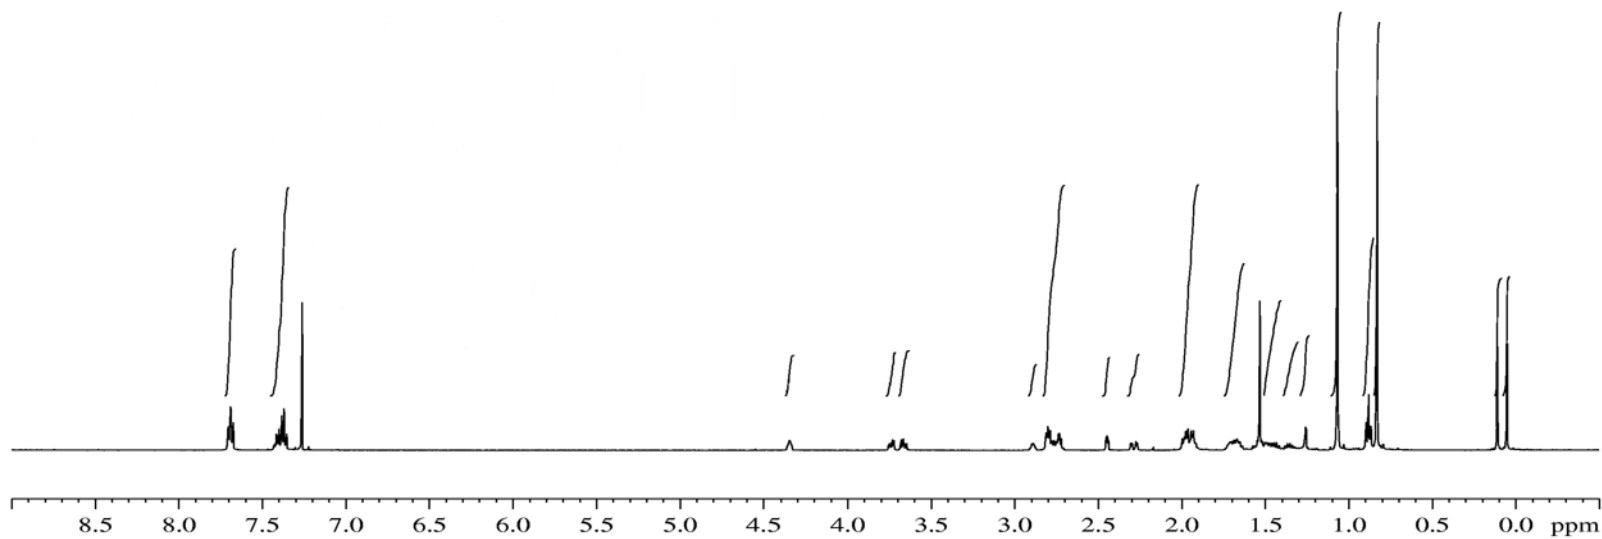

S209

The  $^1\text{H}$  NMR Spectrum of Compound (-)-44 in  $\text{CDCl}_3$

S210

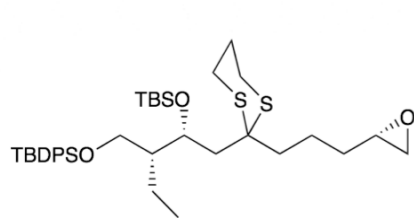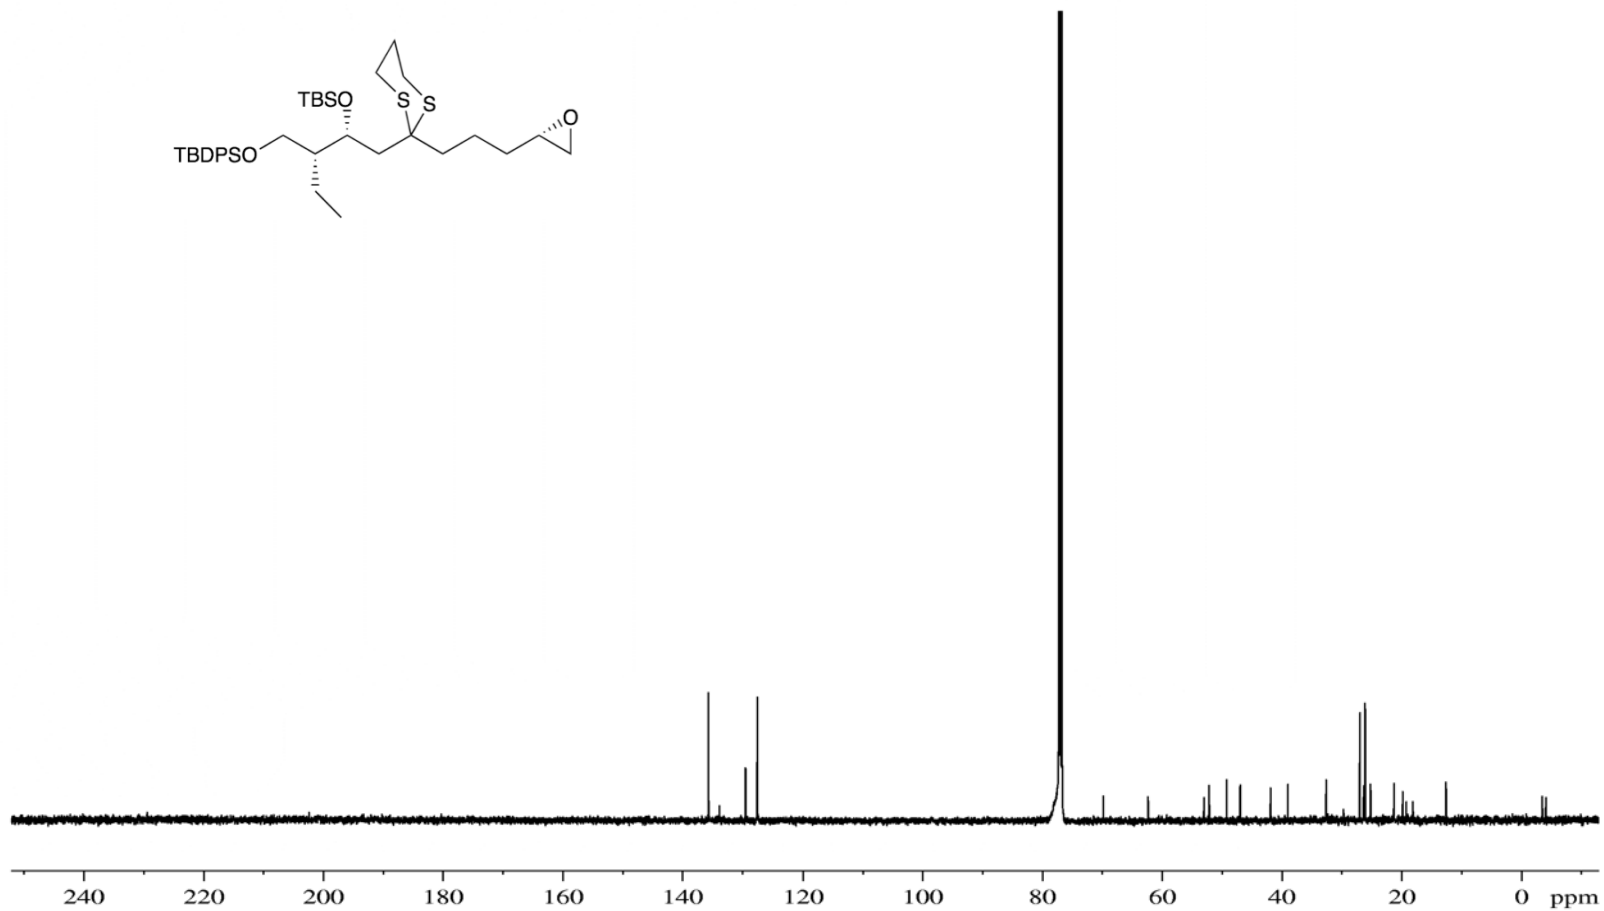

The  $^{13}\text{C}$  NMR Spectrum of Compound (-)-44 in  $\text{CDCl}_3$

S211

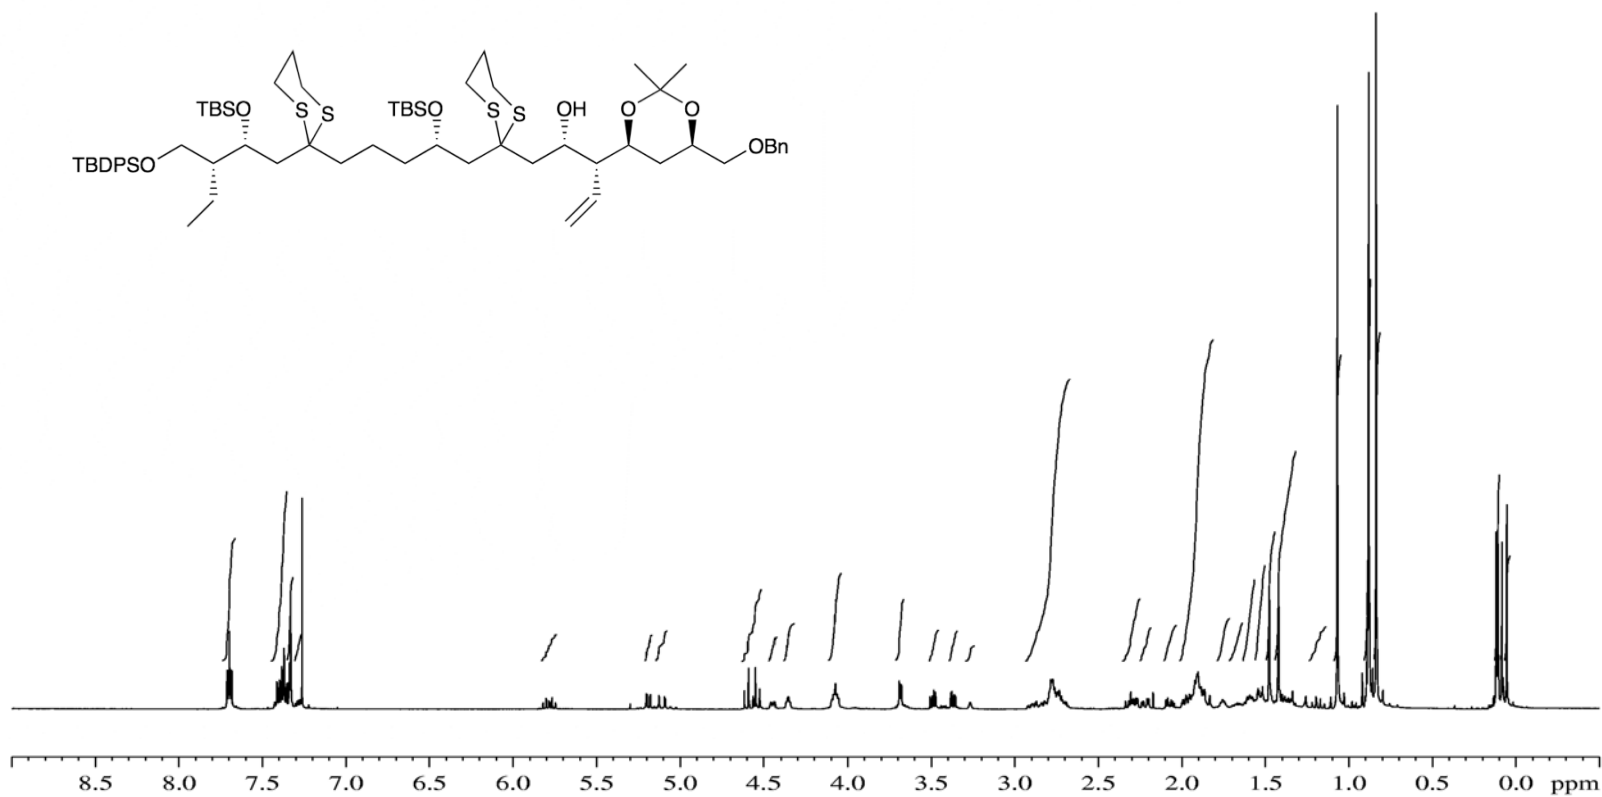

The <sup>1</sup>H NMR Spectrum of Compound (-)-52 in CDCl<sub>3</sub>

S212

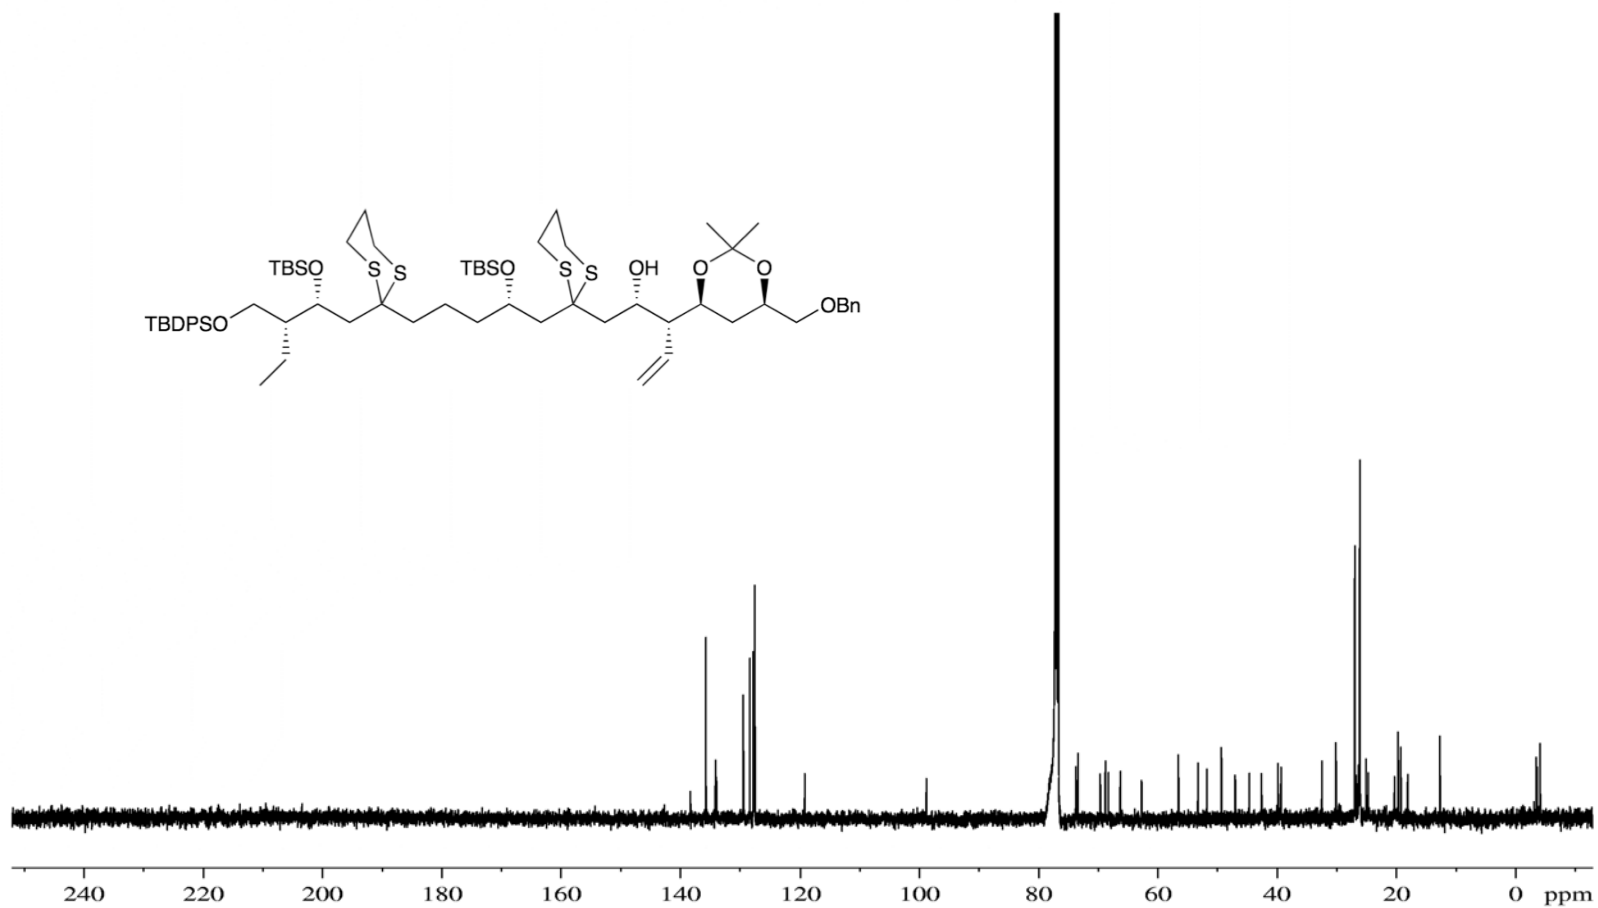

The  $^{13}\text{C}$  NMR Spectrum of Compound (-)-52 in  $\text{CDCl}_3$

S213

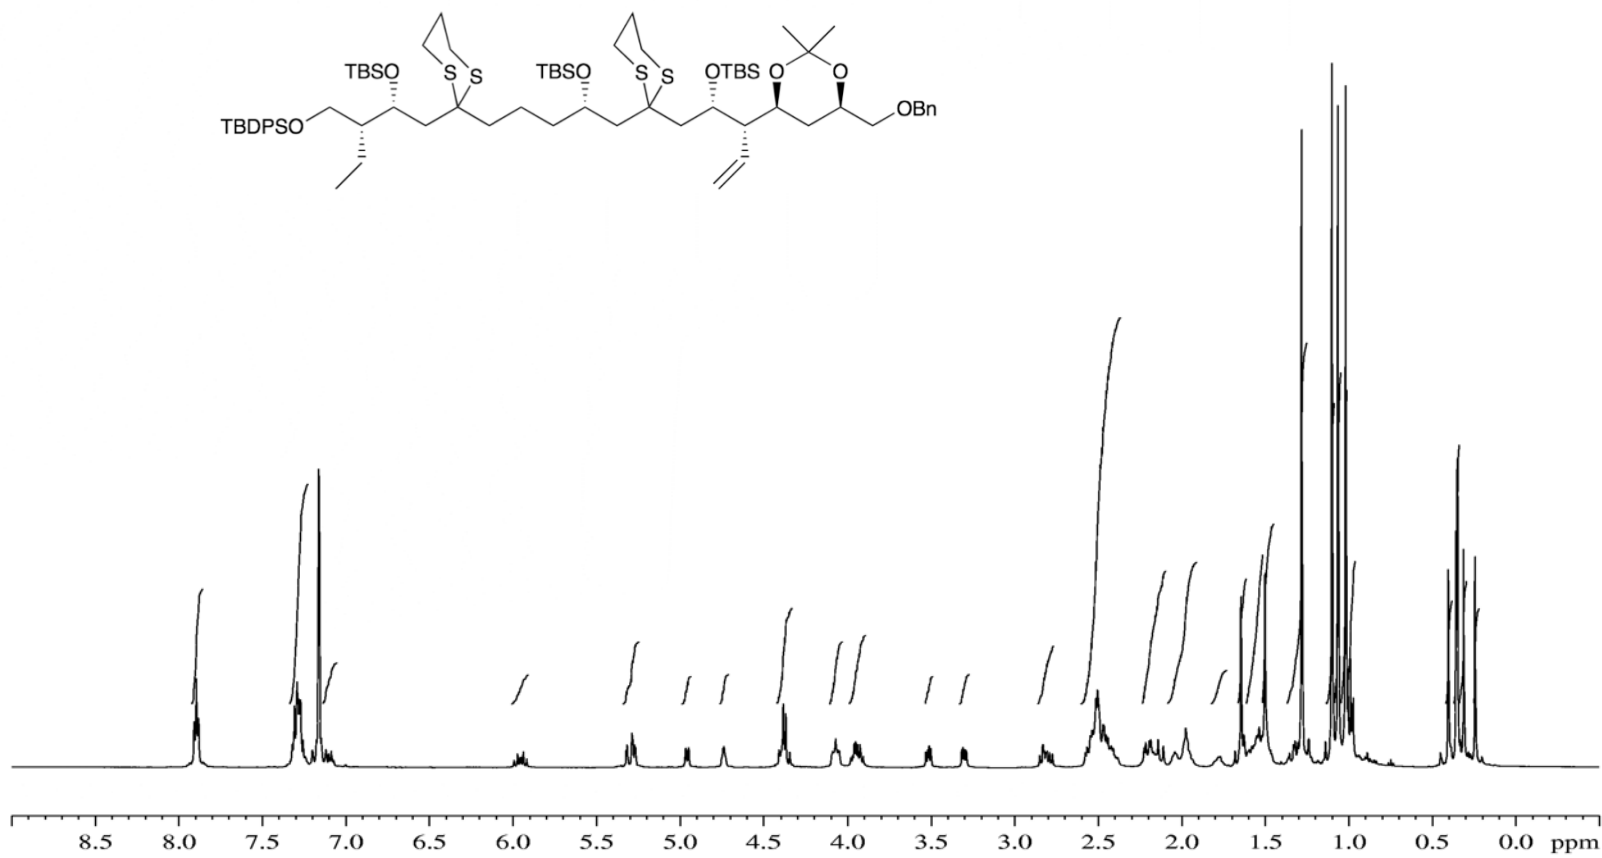

The <sup>1</sup>H NMR Spectrum of Compound (+)-53 in C<sub>6</sub>D<sub>6</sub>

S214

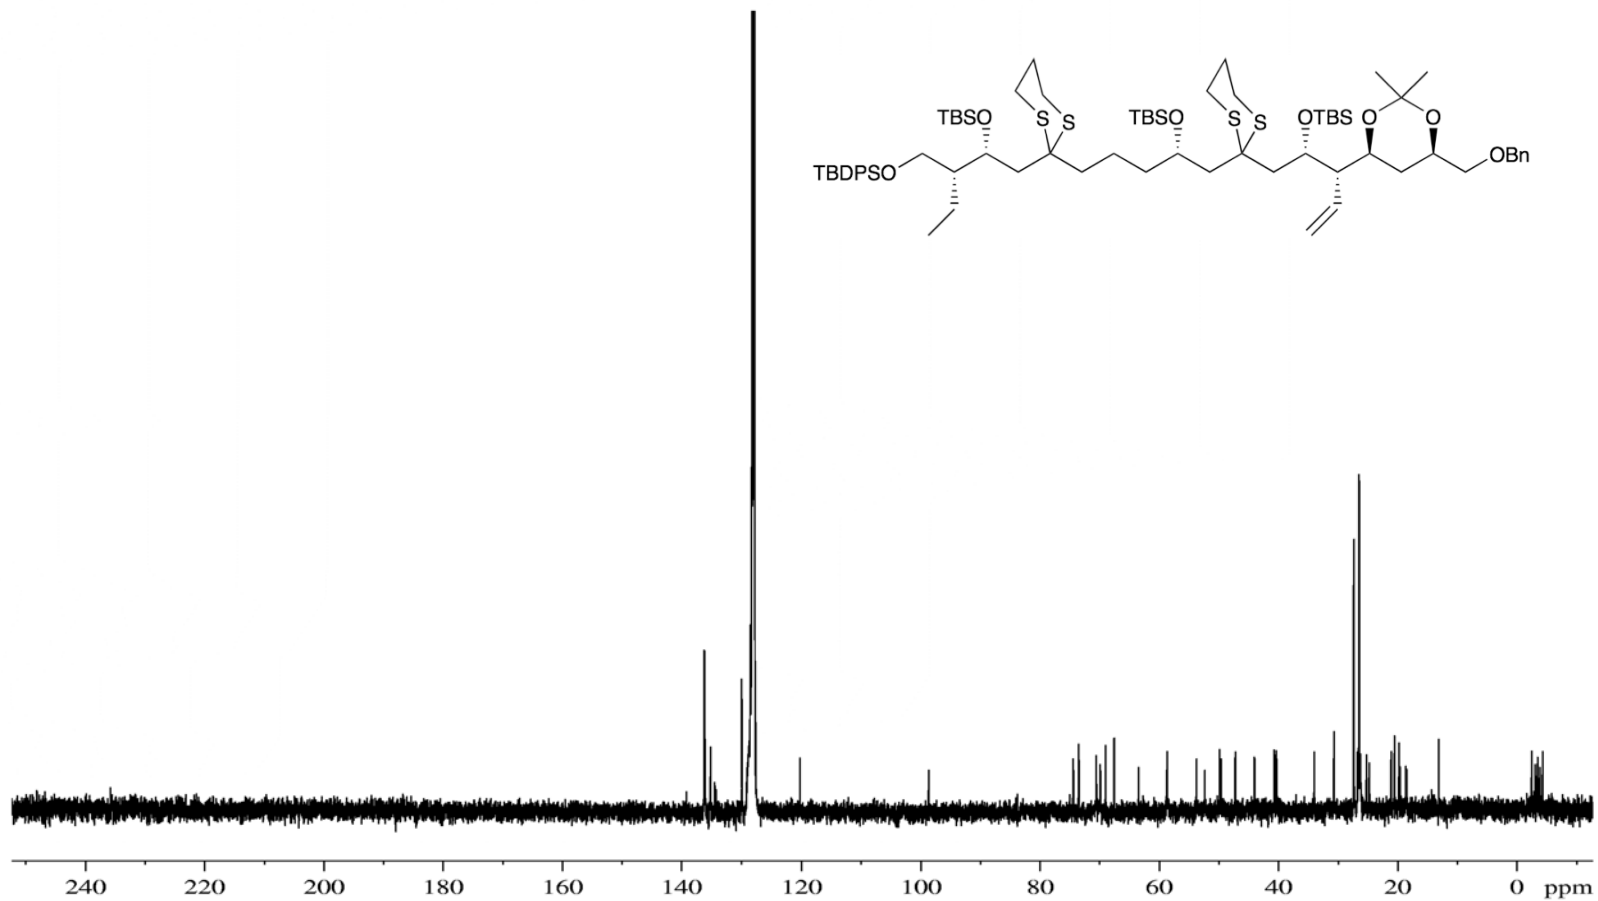

The  $^{13}\text{C}$  NMR Spectrum of Compound (+)-53 in  $\text{C}_6\text{D}_6$



S215

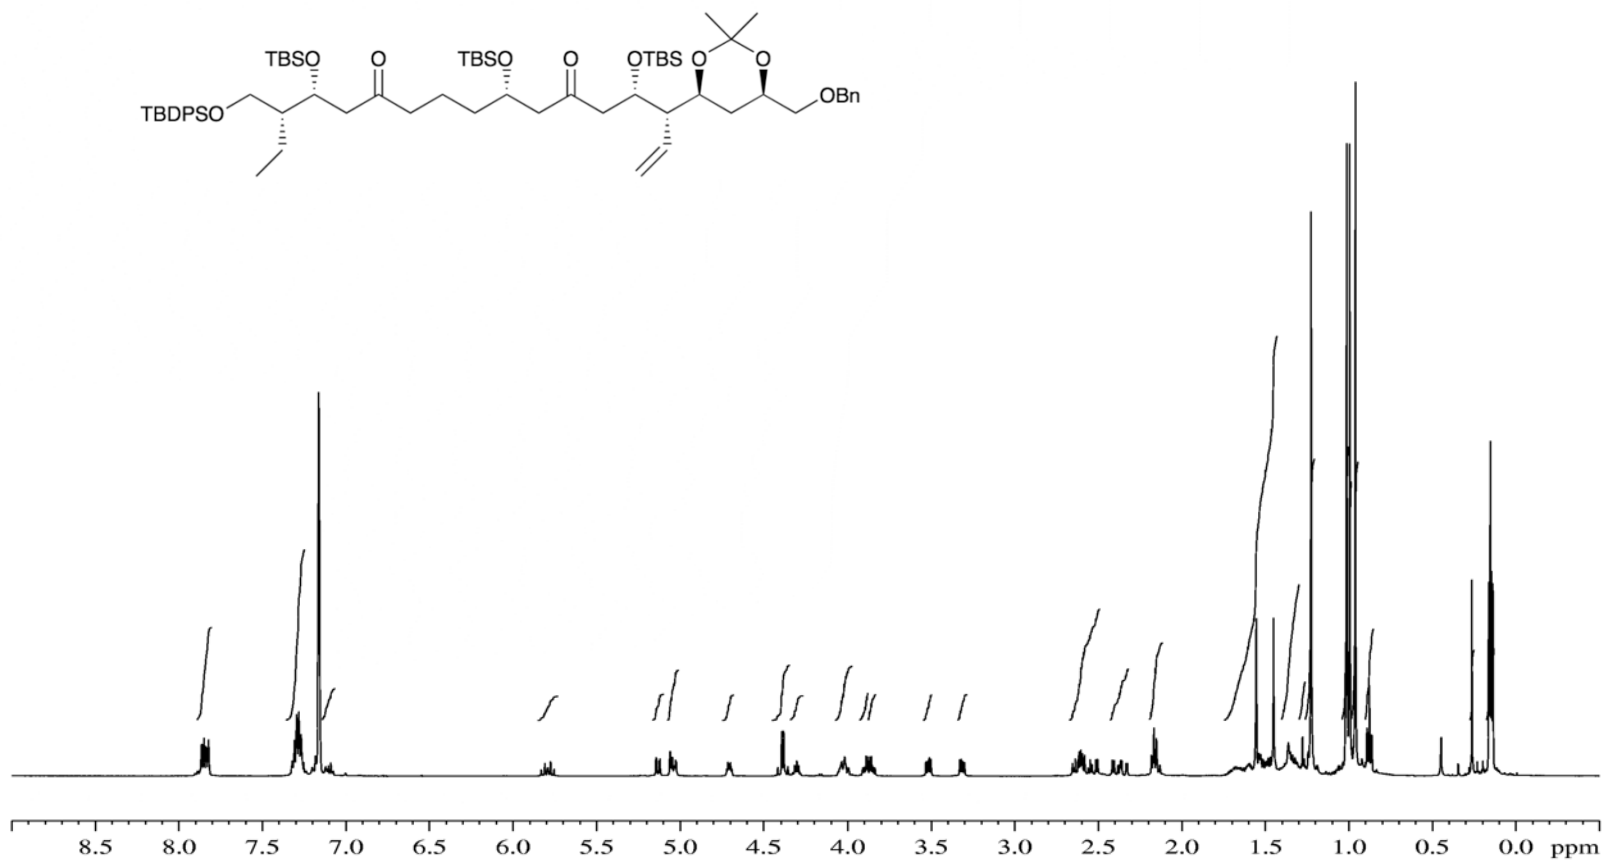

The <sup>1</sup>H NMR Spectrum of Compound (-)-54 in C<sub>6</sub>D<sub>6</sub>

S216

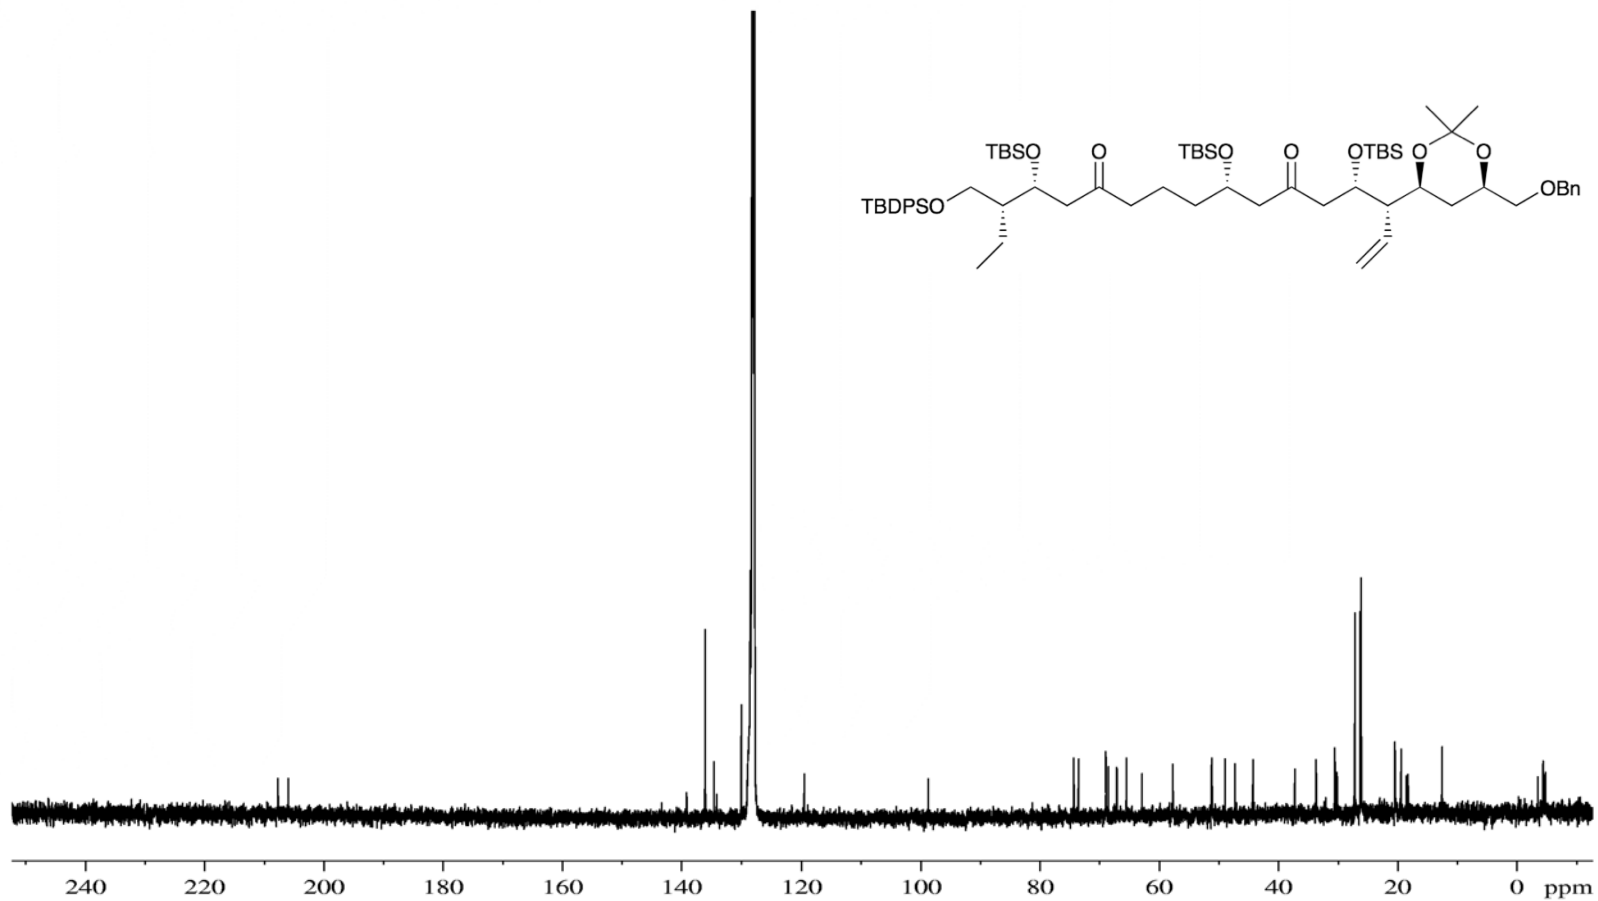

The  $^{13}\text{C}$  NMR Spectrum of Compound (-)-54 in  $\text{C}_6\text{D}_6$

S217

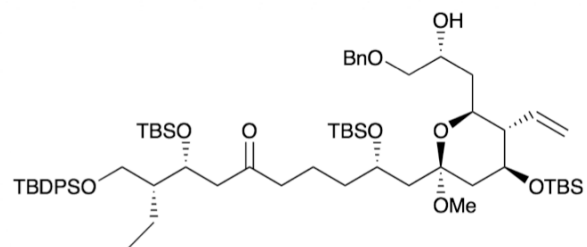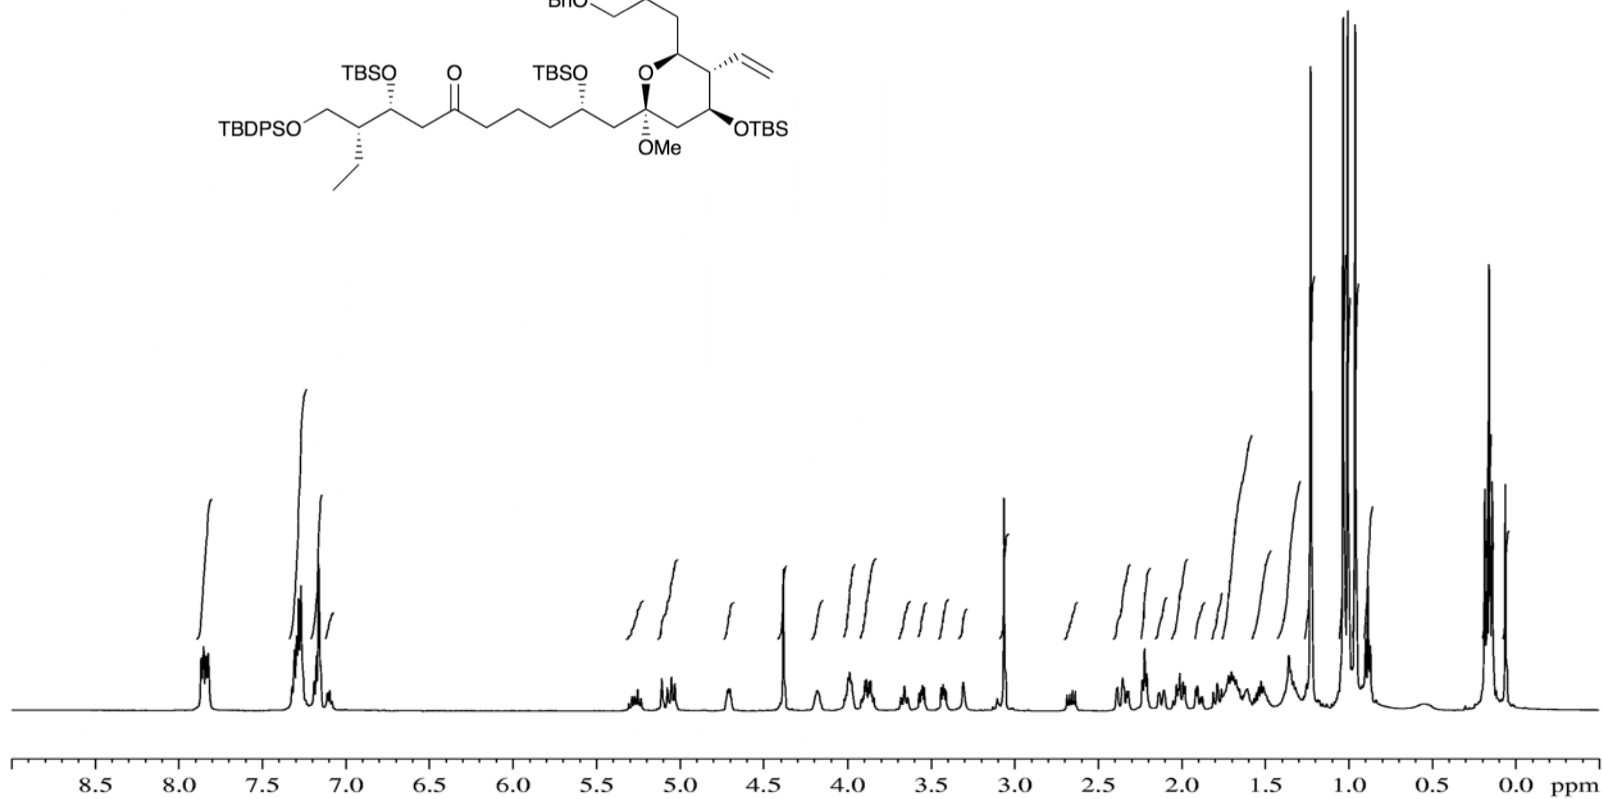

The <sup>1</sup>H NMR Spectrum of Compound (-)-55 in C<sub>6</sub>D<sub>6</sub>

S218

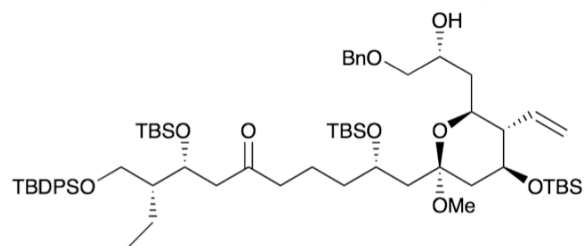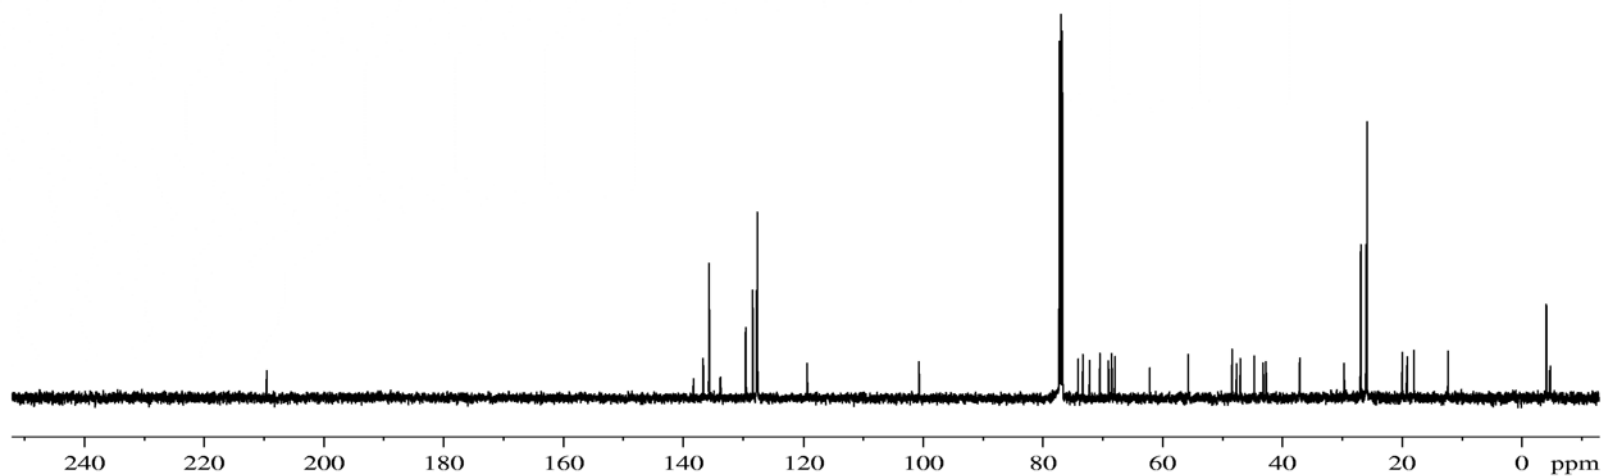

The <sup>13</sup>C NMR Spectrum of Compound (-)-55 in CDCl<sub>3</sub>

S219

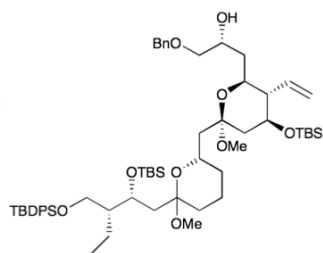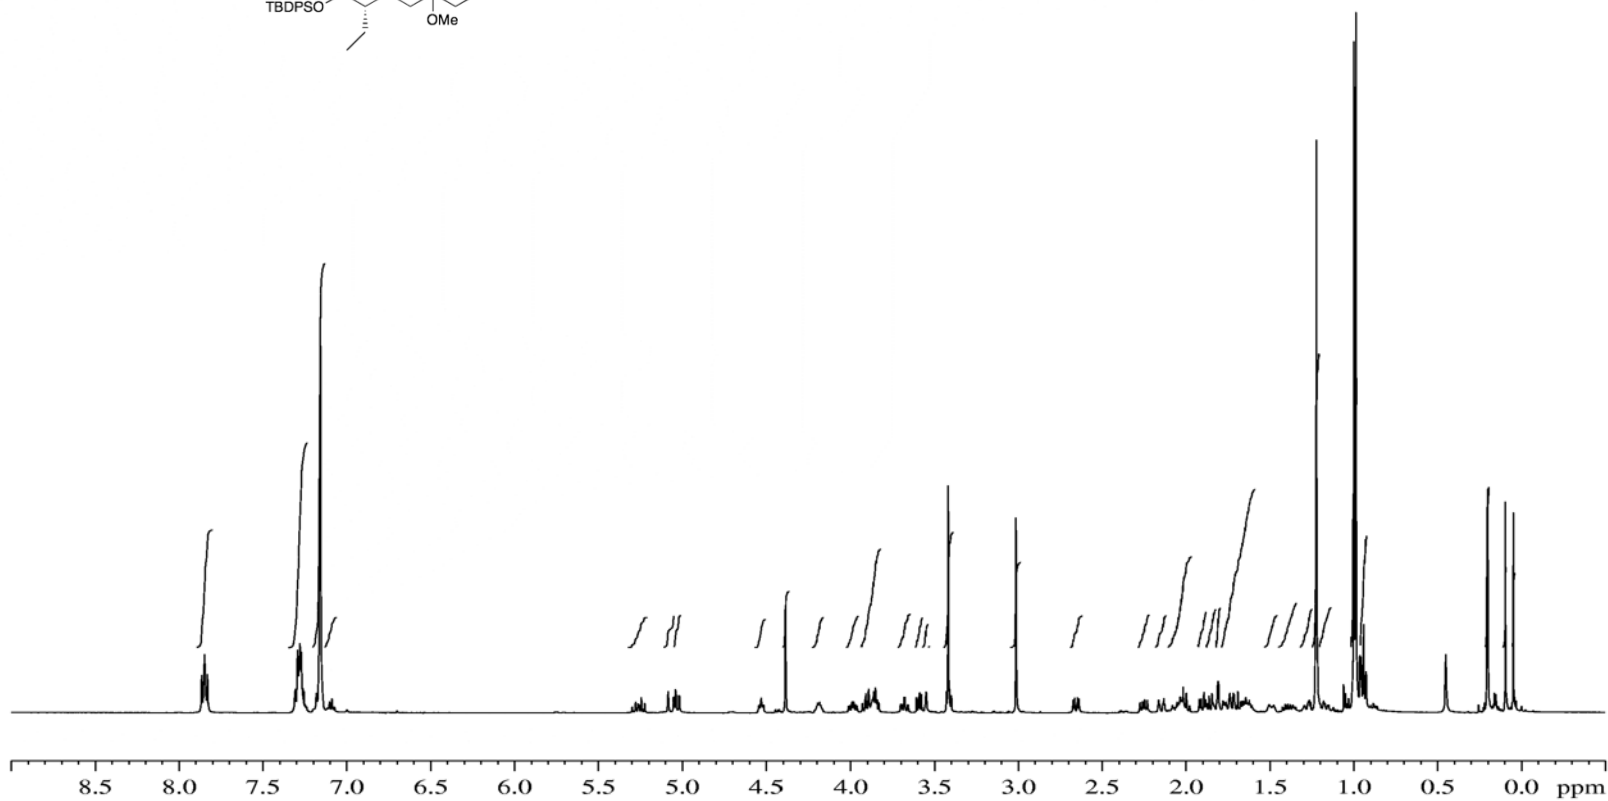

The <sup>1</sup>H NMR Spectrum of Compound (-)-56 in C<sub>6</sub>D<sub>6</sub>

S220

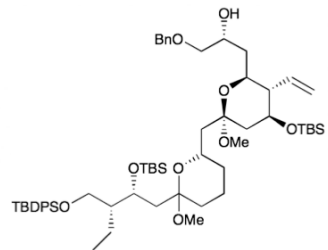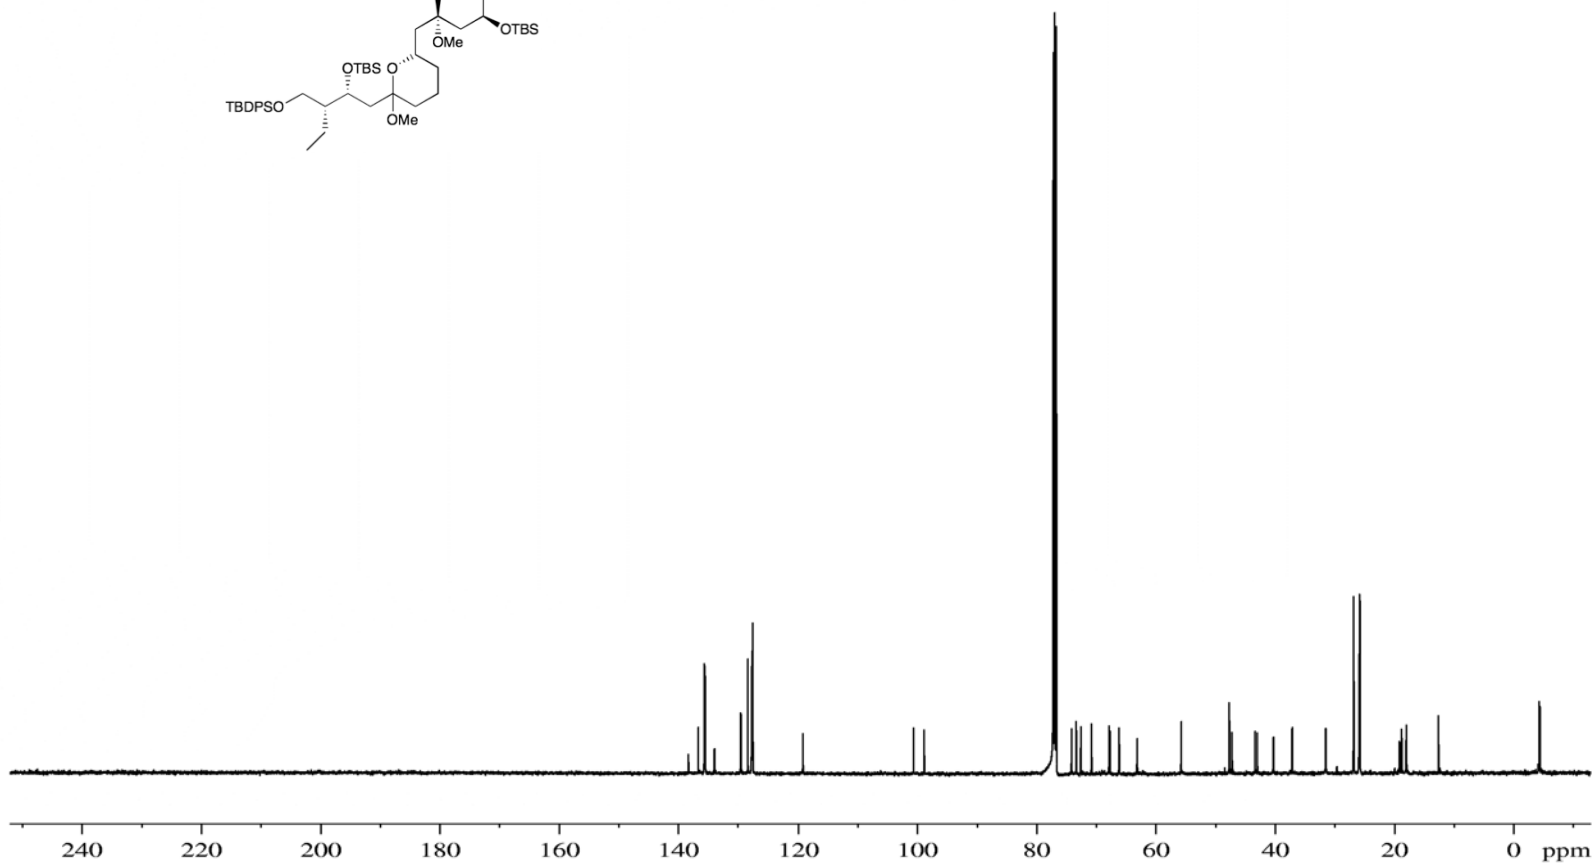

The <sup>13</sup>C NMR Spectrum of Compound (-)-56 in CDCl<sub>3</sub>

S221

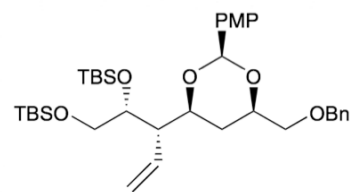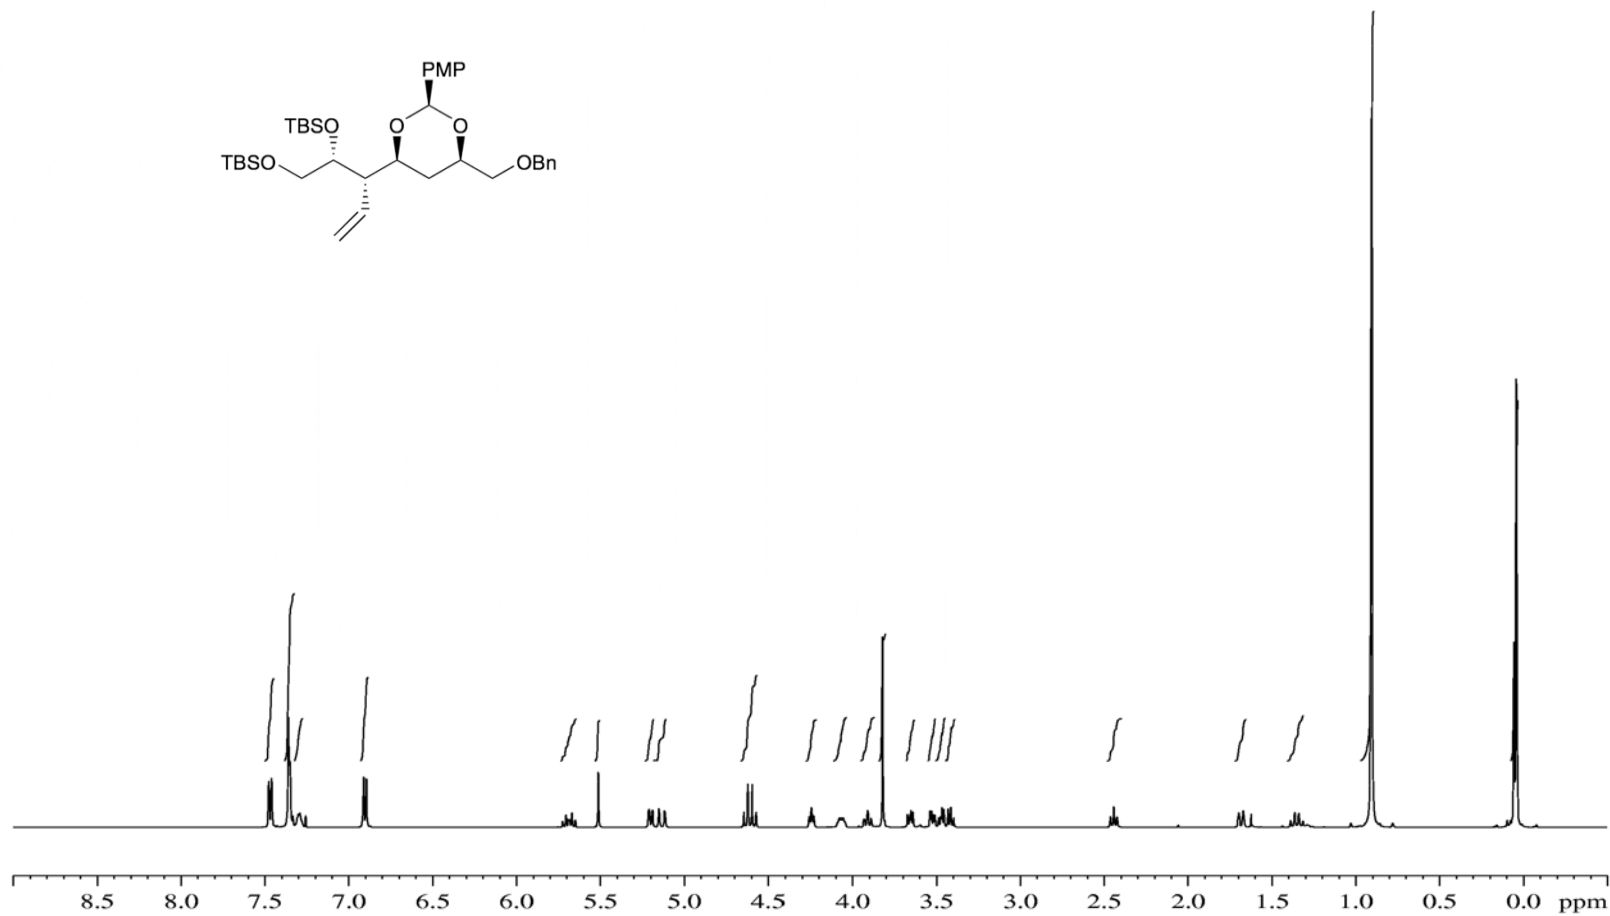

The  $^1\text{H}$  NMR Spectrum of Compound (-)-**S22** in  $\text{CDCl}_3$

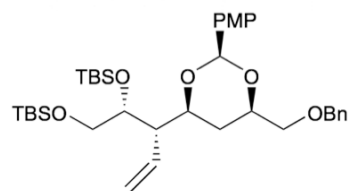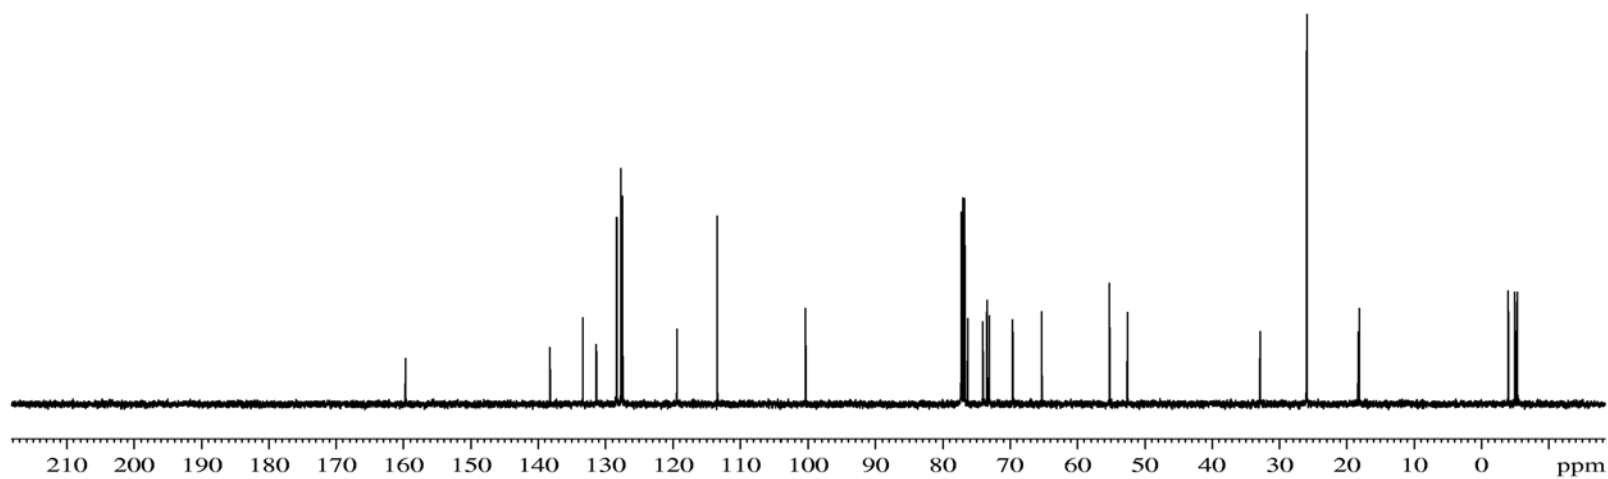

The <sup>13</sup>C NMR Spectrum of Compound (-)-S22 in CDCl<sub>3</sub>



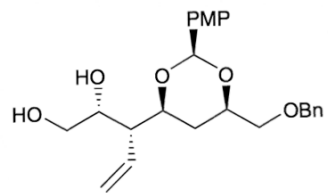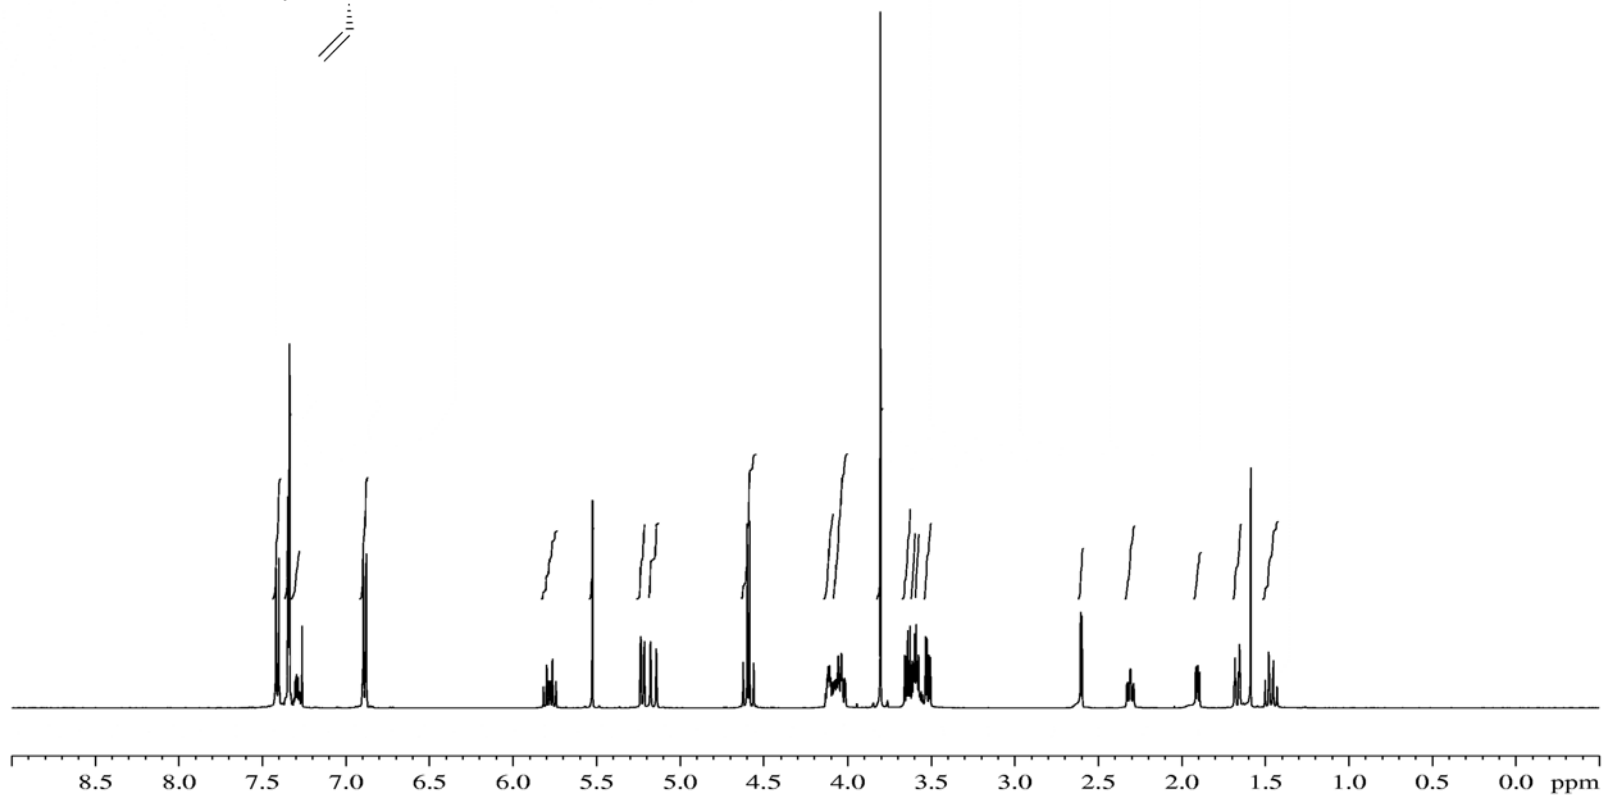

S223

The <sup>1</sup>H NMR Spectrum of Compound (-)-**S23** in CDCl<sub>3</sub>

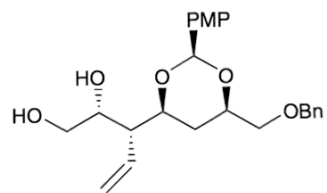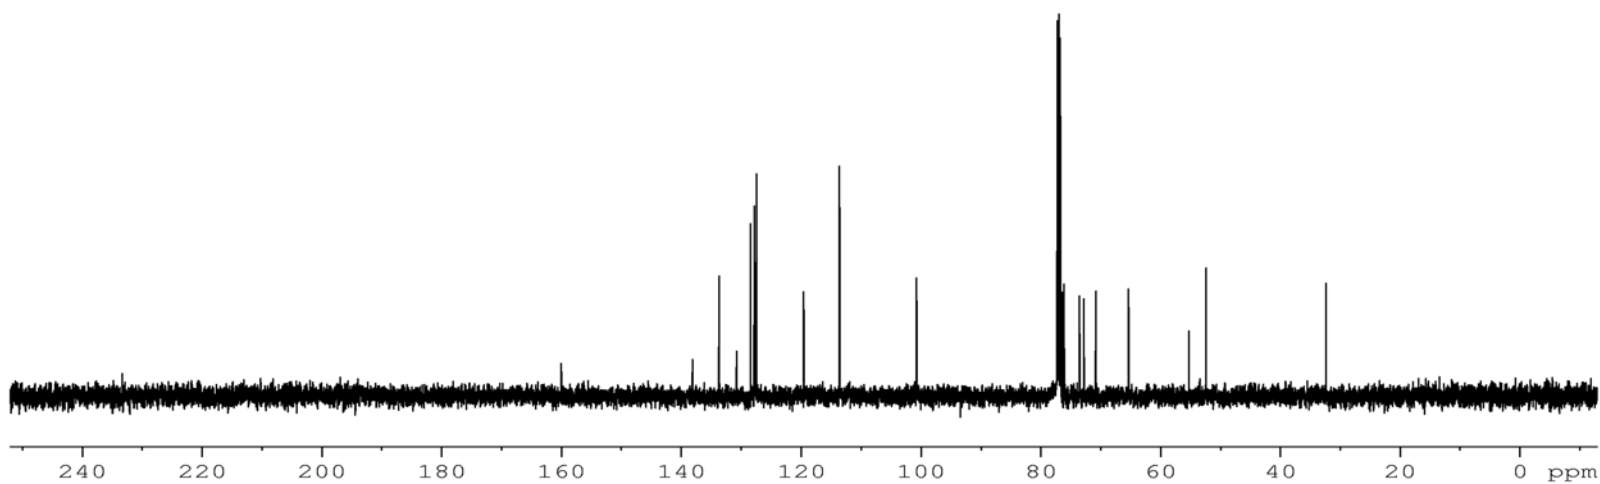

The <sup>13</sup>C NMR Spectrum of Compound (-)-S23 in CDCl<sub>3</sub>

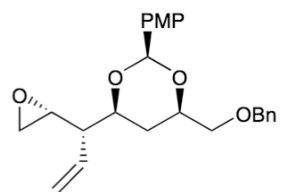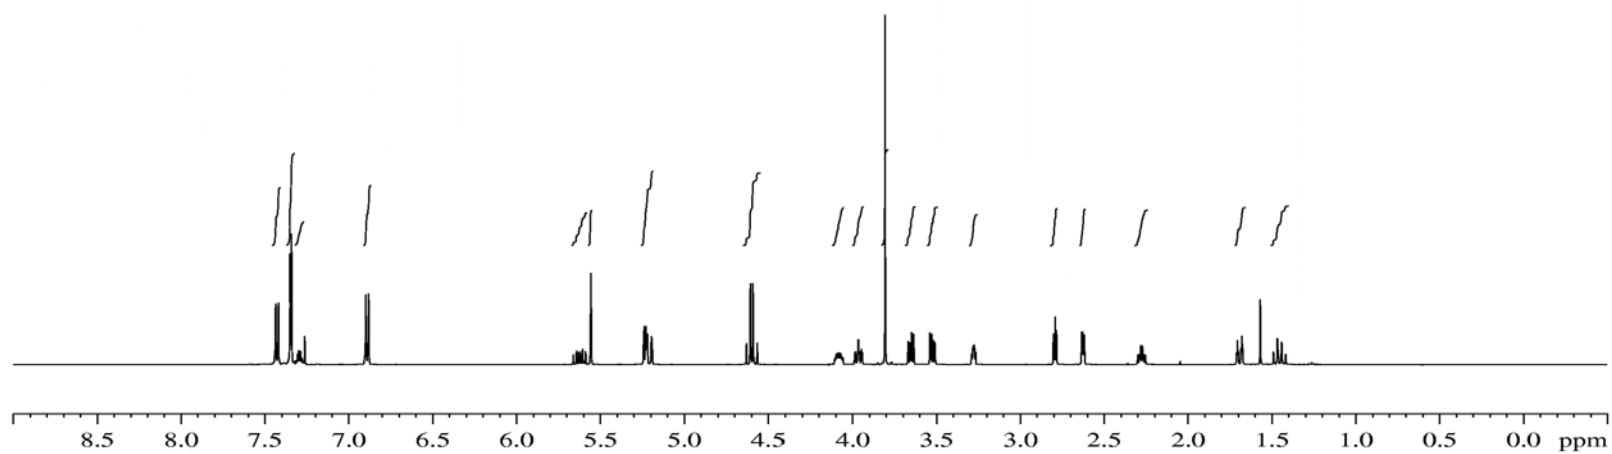

The <sup>1</sup>H NMR Spectrum of Compound (-)-57 in CDCl<sub>3</sub>

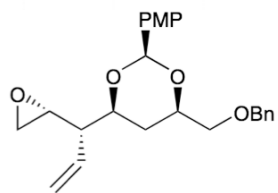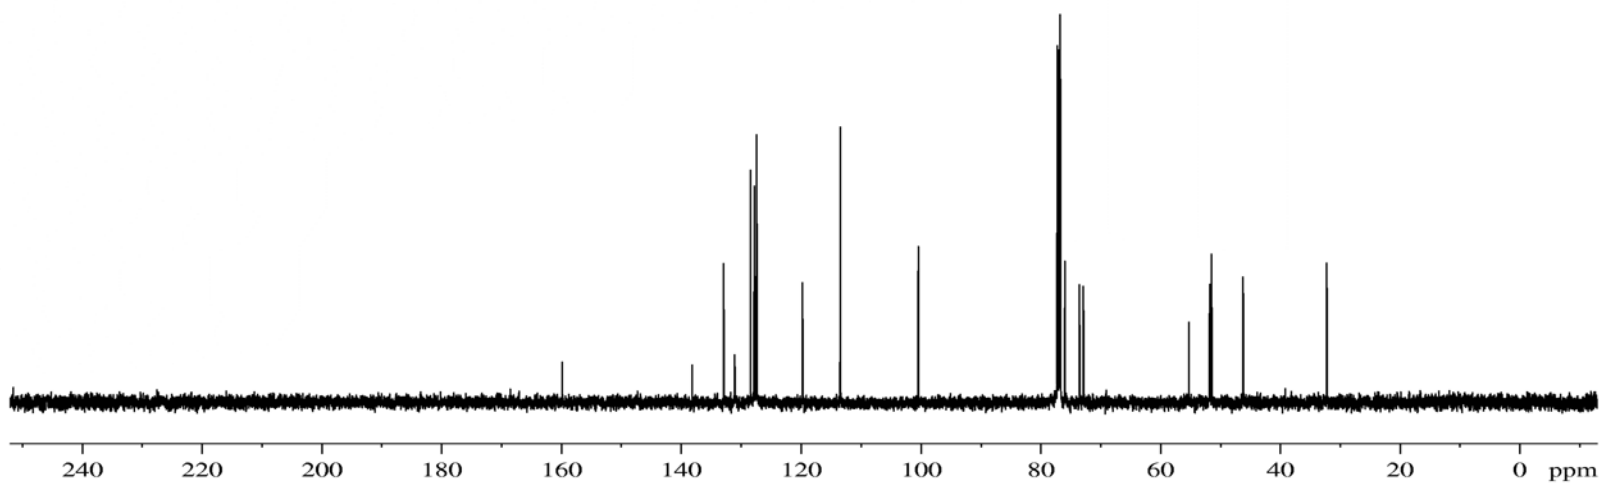

The  $^{13}\text{C}$  NMR Spectrum of Compound (-)-57 in  $\text{CDCl}_3$

S227

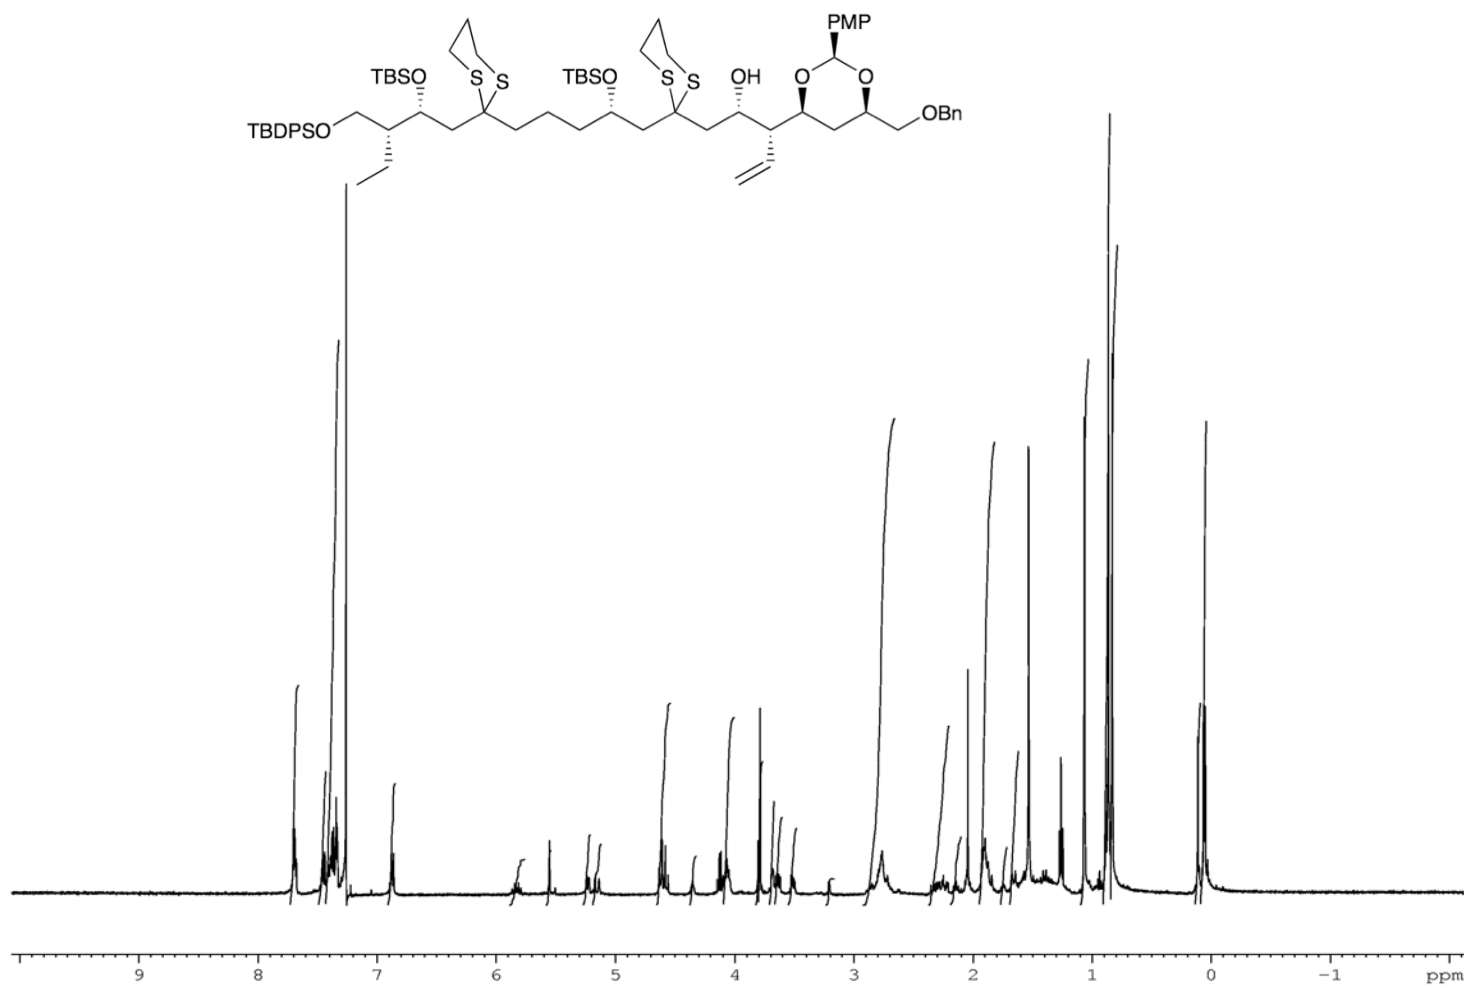

The  $^1\text{H}$  NMR Spectrum of Compound **58** in  $\text{CDCl}_3$

S228

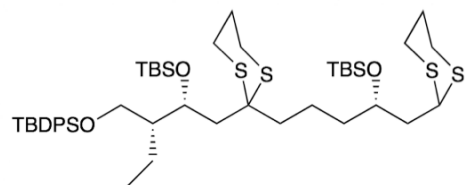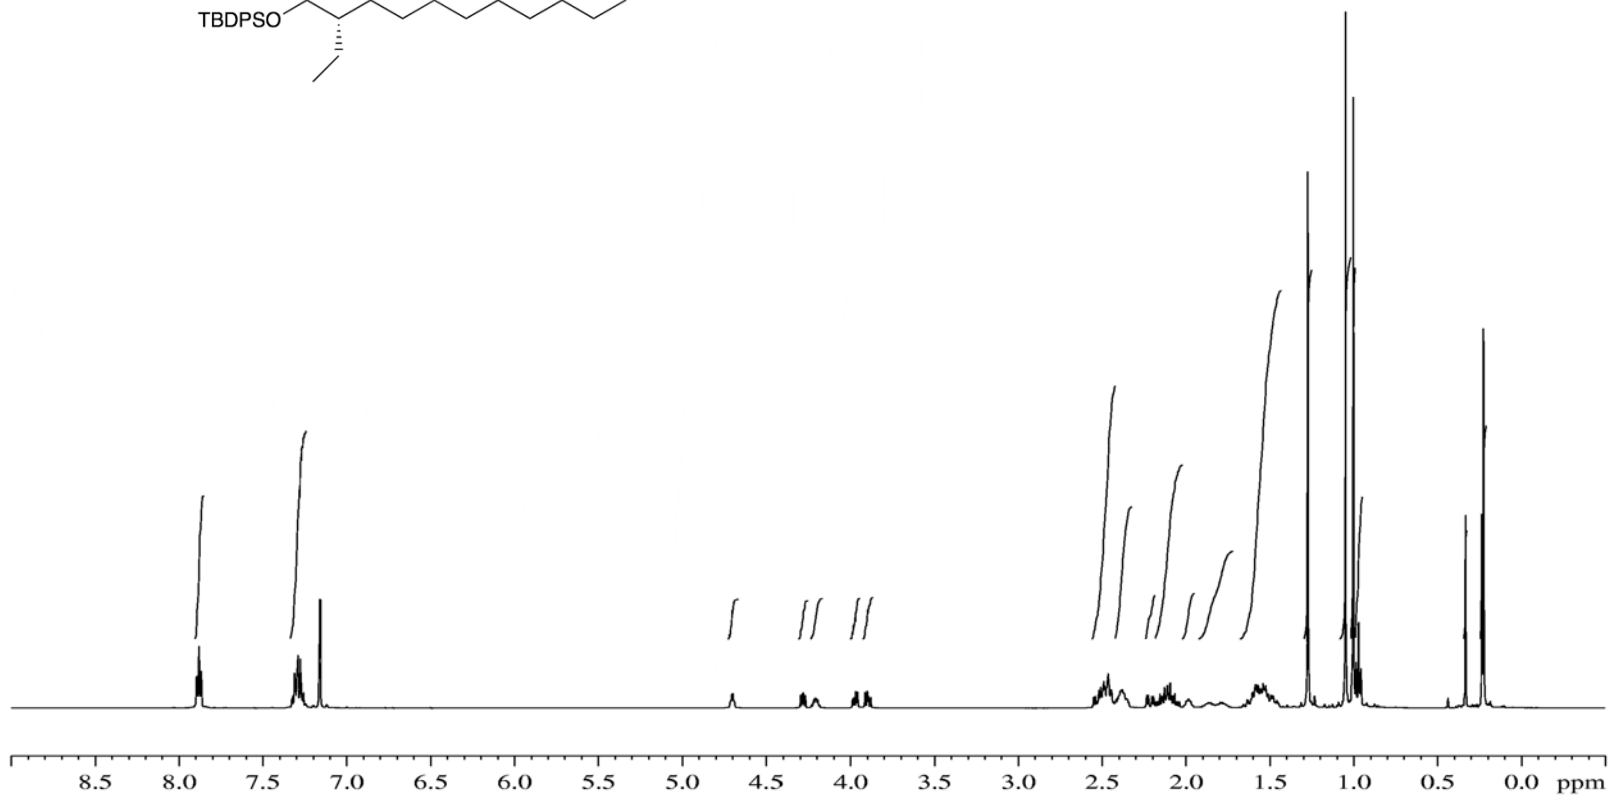

The <sup>1</sup>H NMR Spectrum of Compound (+)-**59** in C<sub>6</sub>D<sub>6</sub>

S229

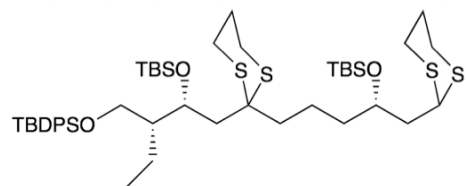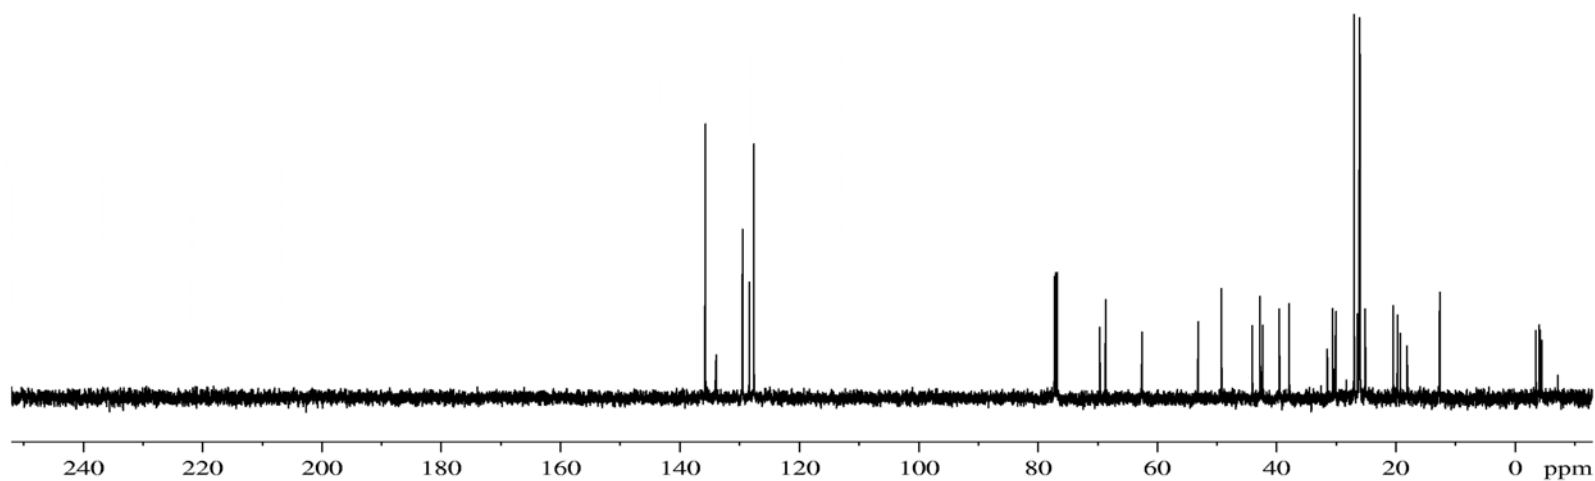

The  $^{13}\text{C}$  NMR Spectrum of Compound (+)-59 in  $\text{CDCl}_3$

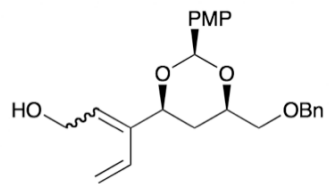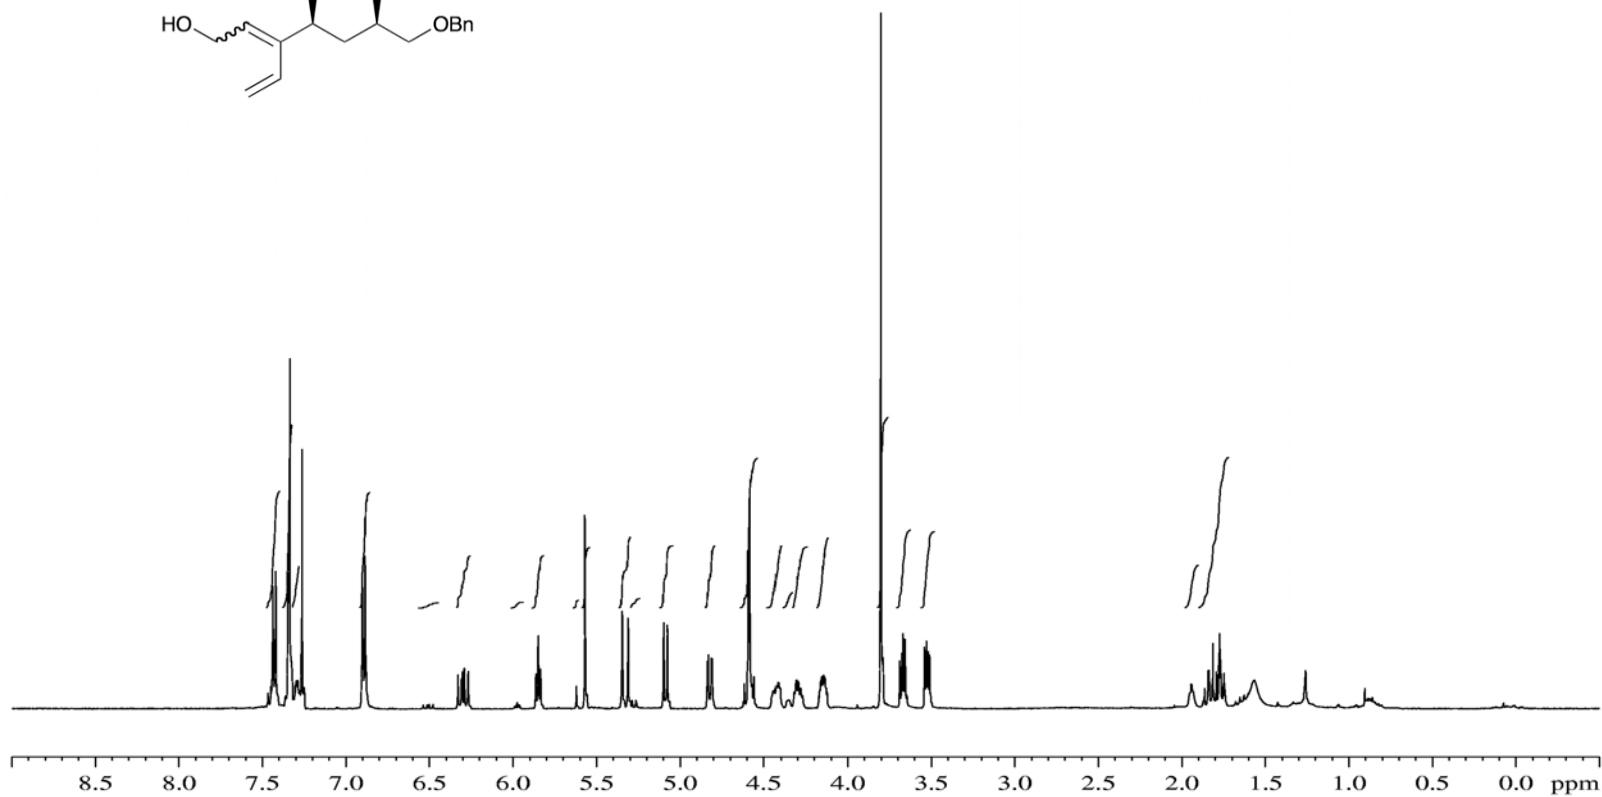

The <sup>1</sup>H NMR Spectrum of Compound (+)-**60** in CDCl<sub>3</sub>



S231

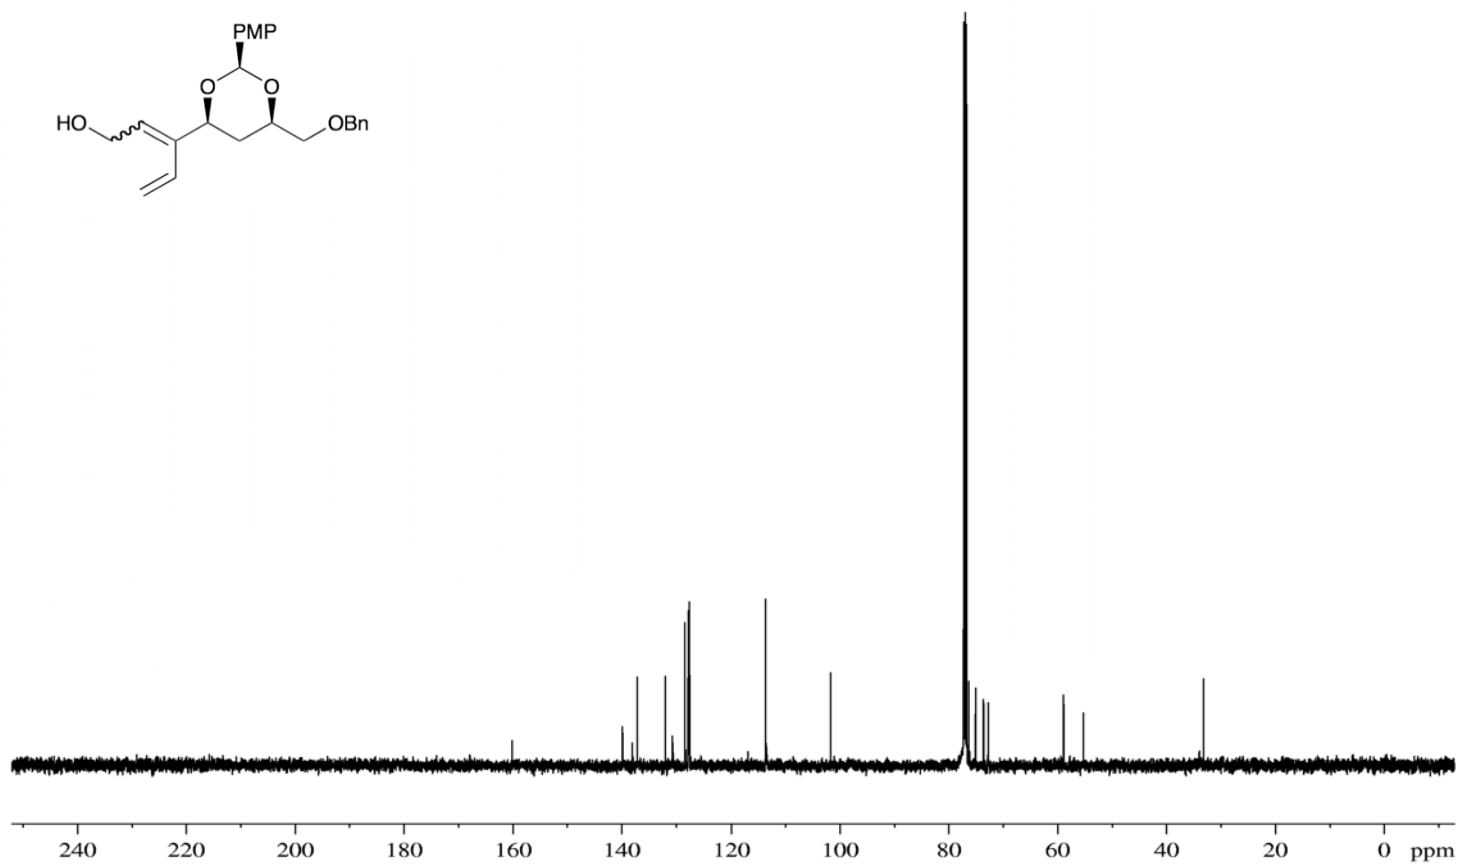

The  $^{13}\text{C}$  NMR Spectrum of Compound (+)-60 in  $\text{CDCl}_3$

S232

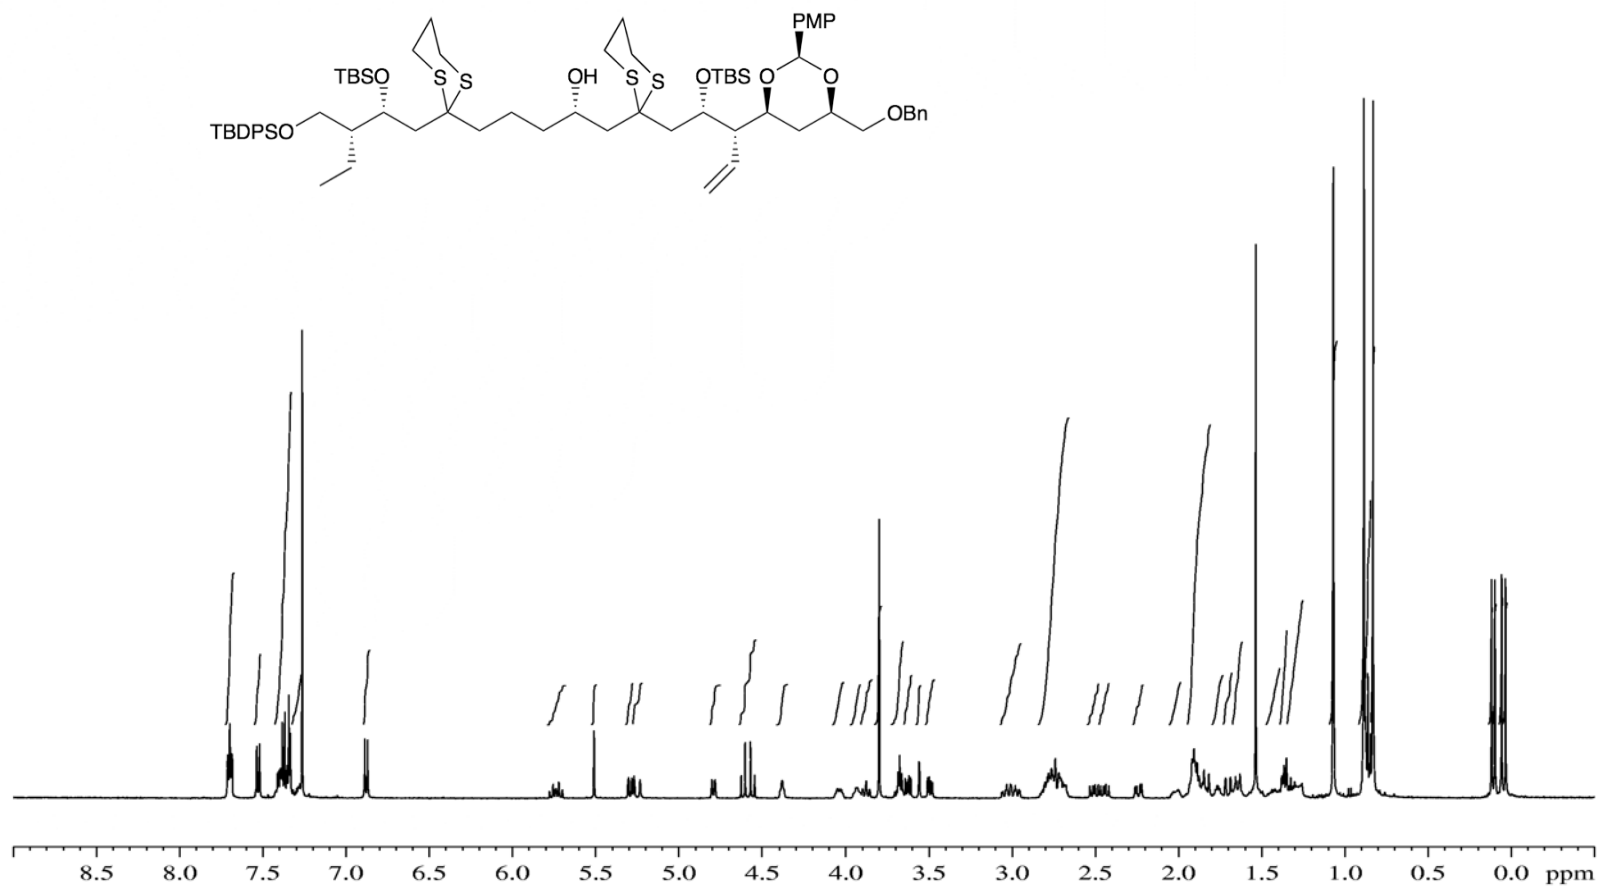

The <sup>1</sup>H NMR Spectrum of Compound (-)-61 in CDCl<sub>3</sub>

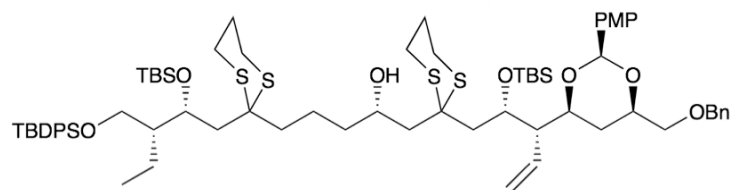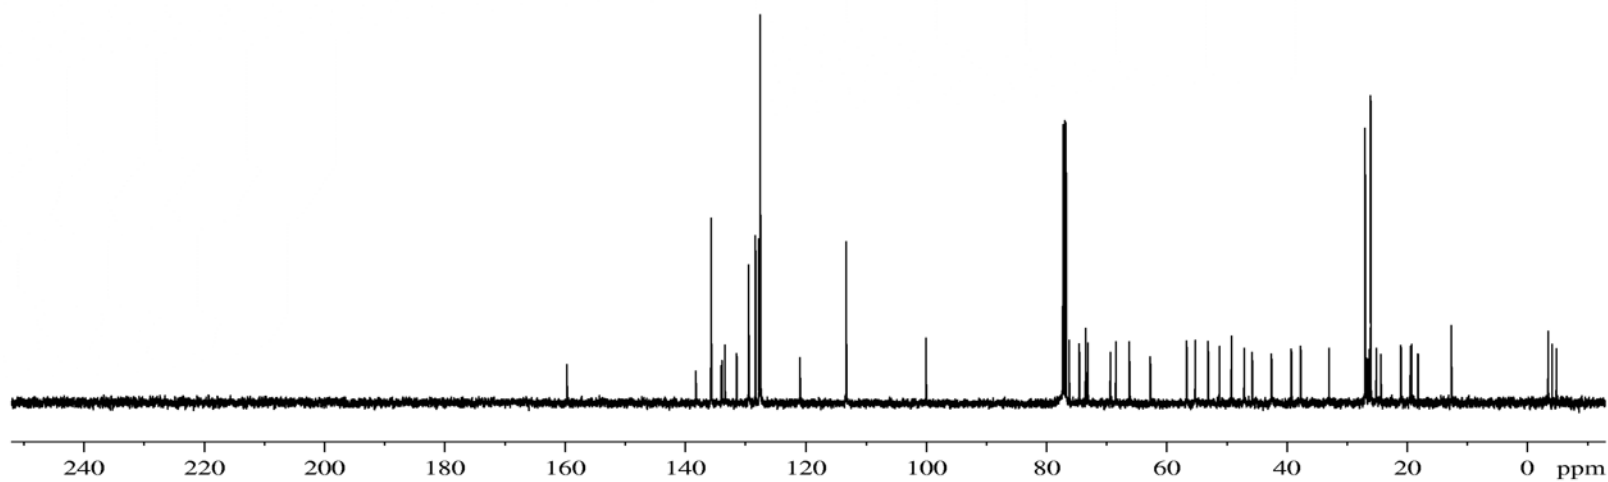

S233

The  $^{13}\text{C}$  NMR Spectrum of Compound (-)-61 in  $\text{CDCl}_3$

S234

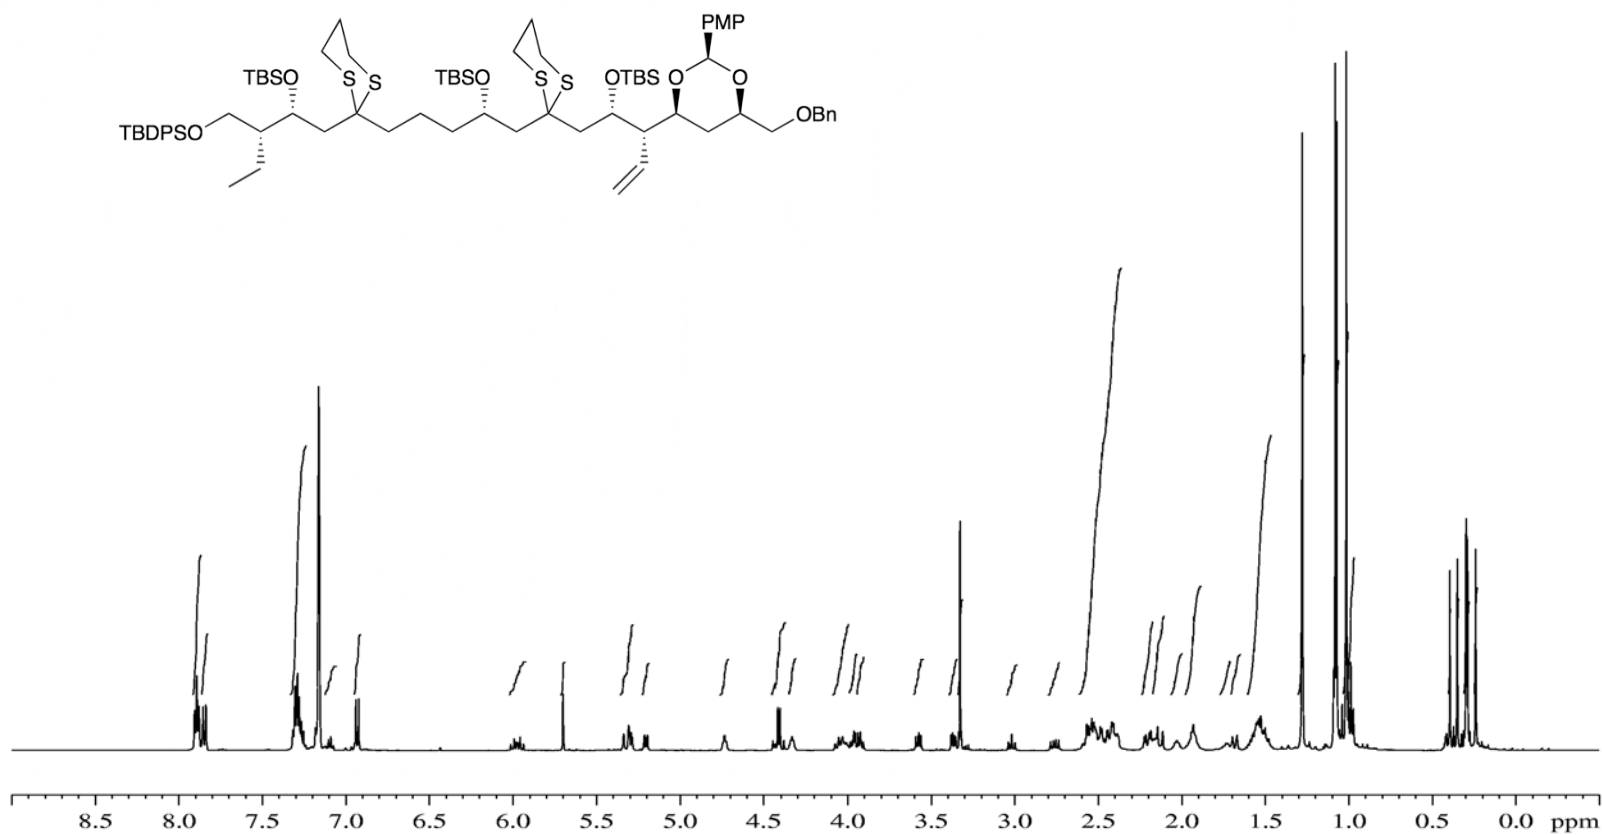

The <sup>1</sup>H NMR Spectrum of Compound (-)-S24 in C<sub>6</sub>D<sub>6</sub>

S235

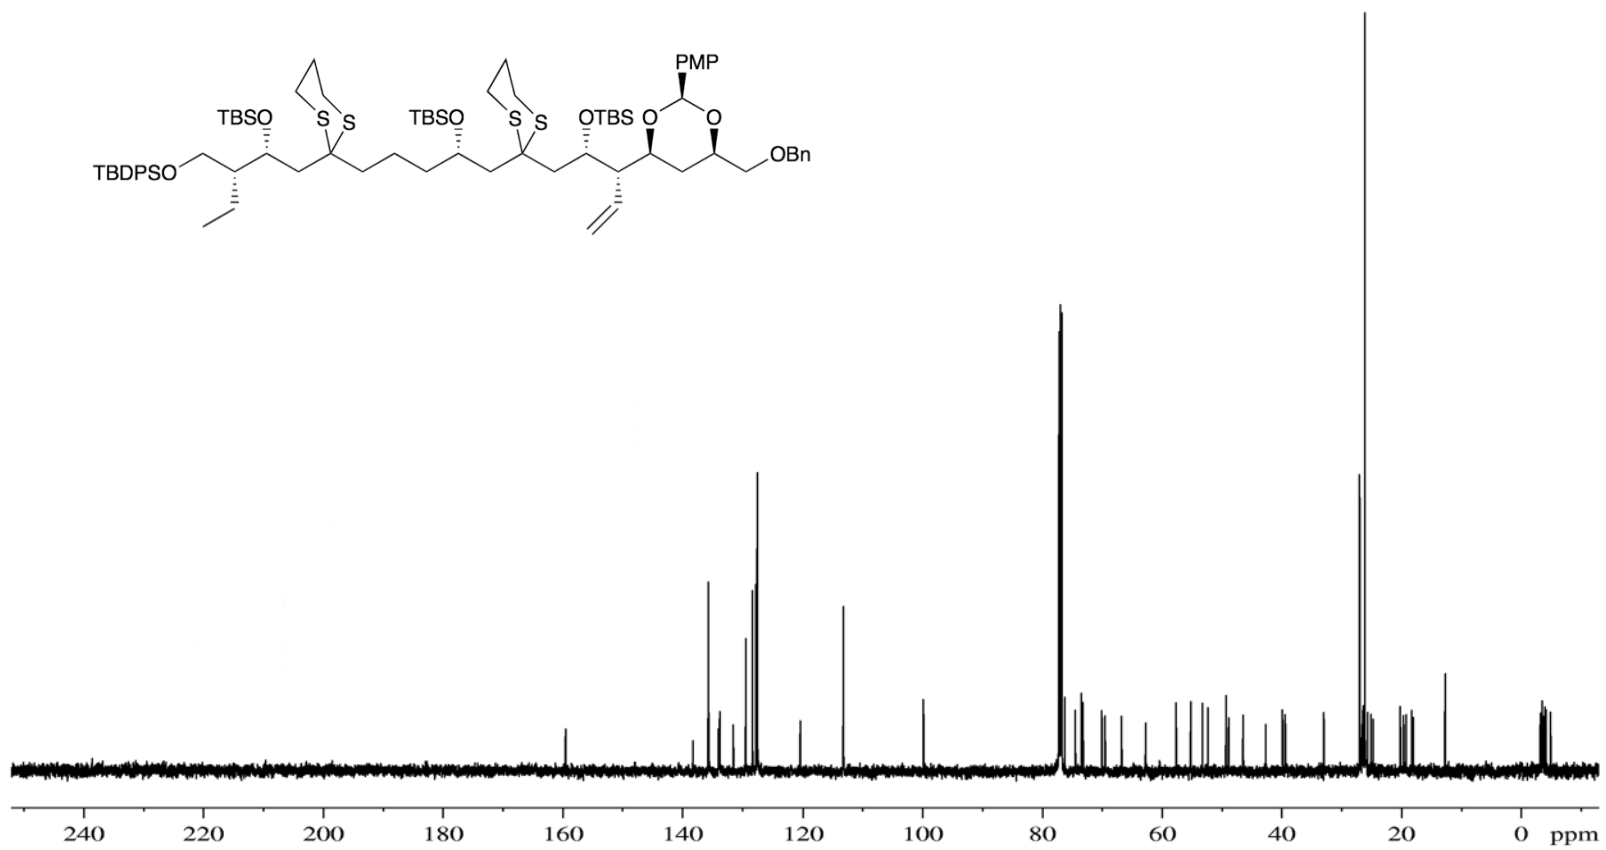

The <sup>13</sup>C NMR Spectrum of Compound (-)-S24 in CDCl<sub>3</sub>

S236

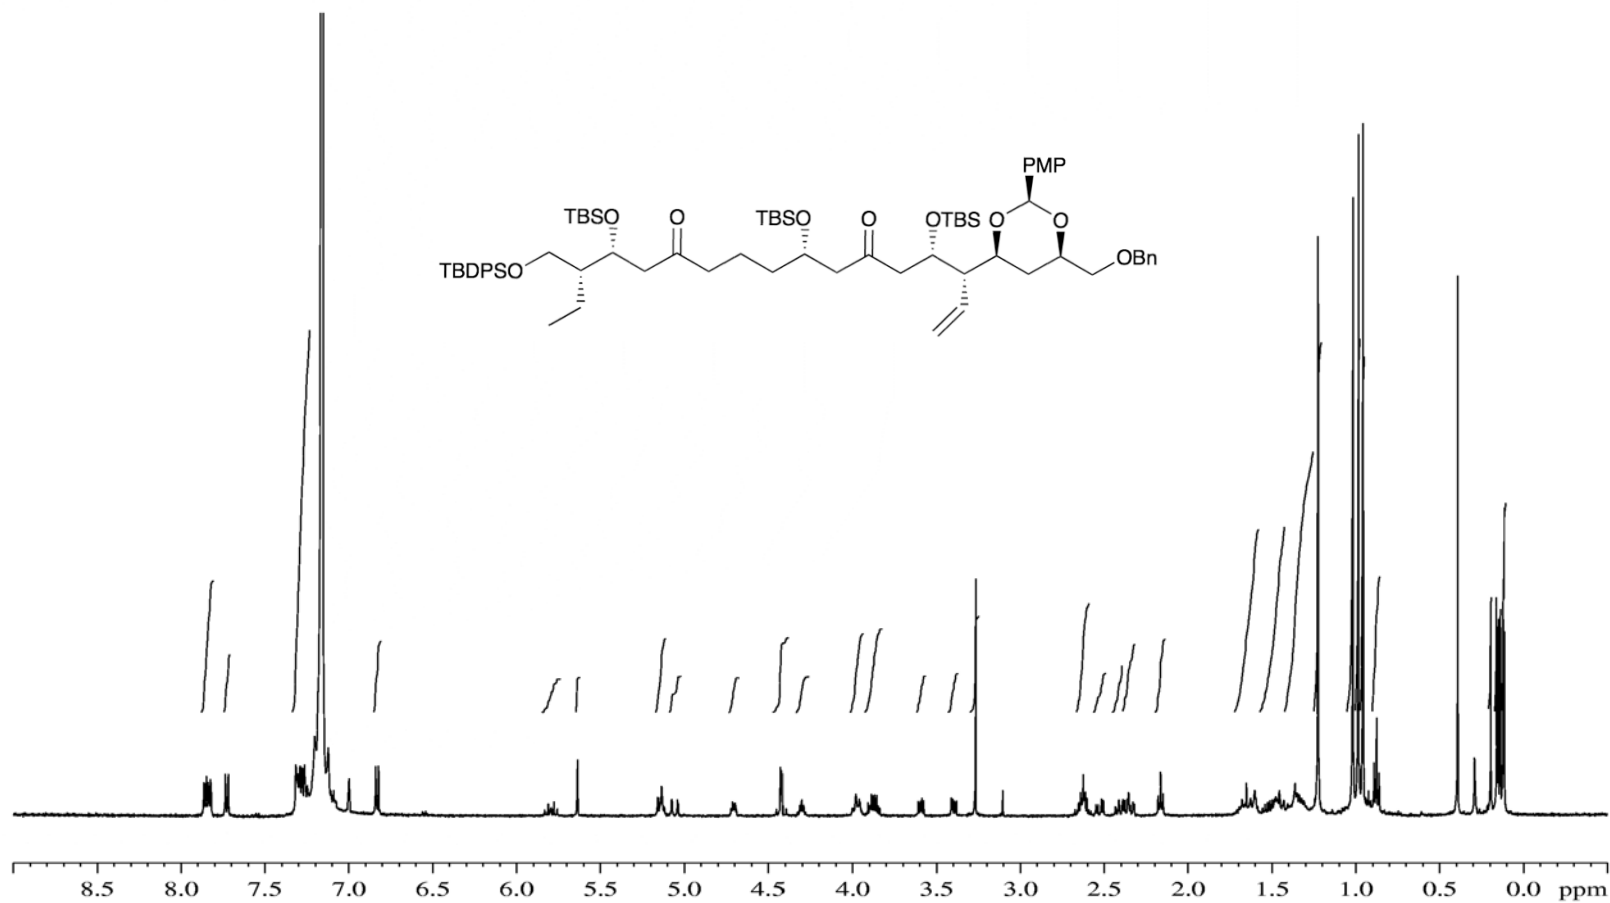

The <sup>1</sup>H NMR Spectrum of Compound (+)-62 in C<sub>6</sub>D<sub>6</sub>

S237

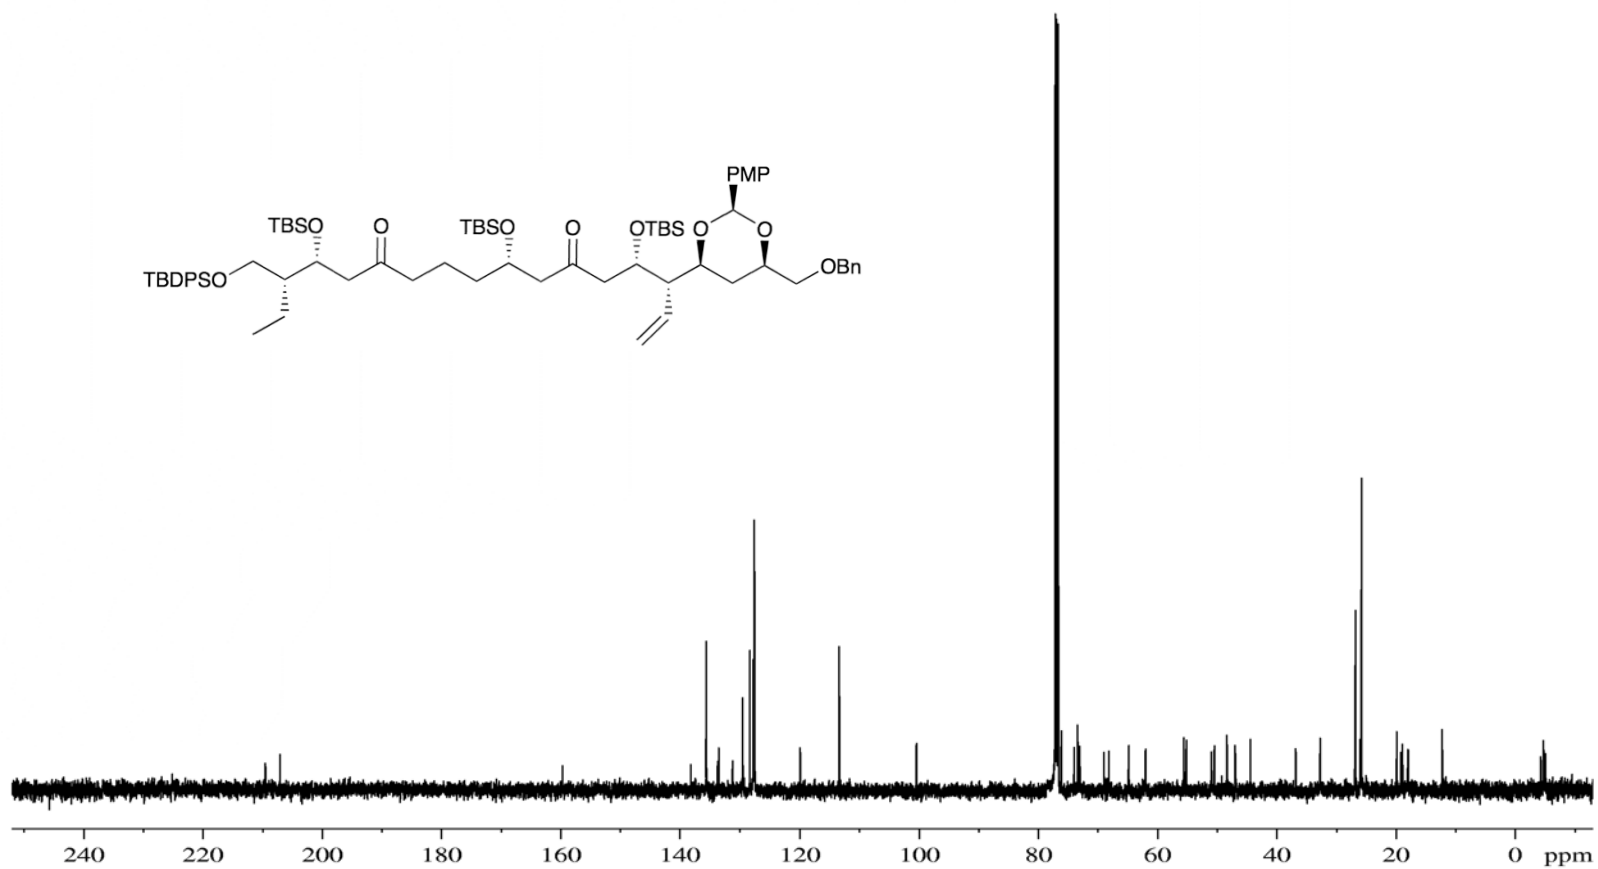

The  $^{13}\text{C}$  NMR Spectrum of Compound (+)-62 in  $\text{CDCl}_3$

S238

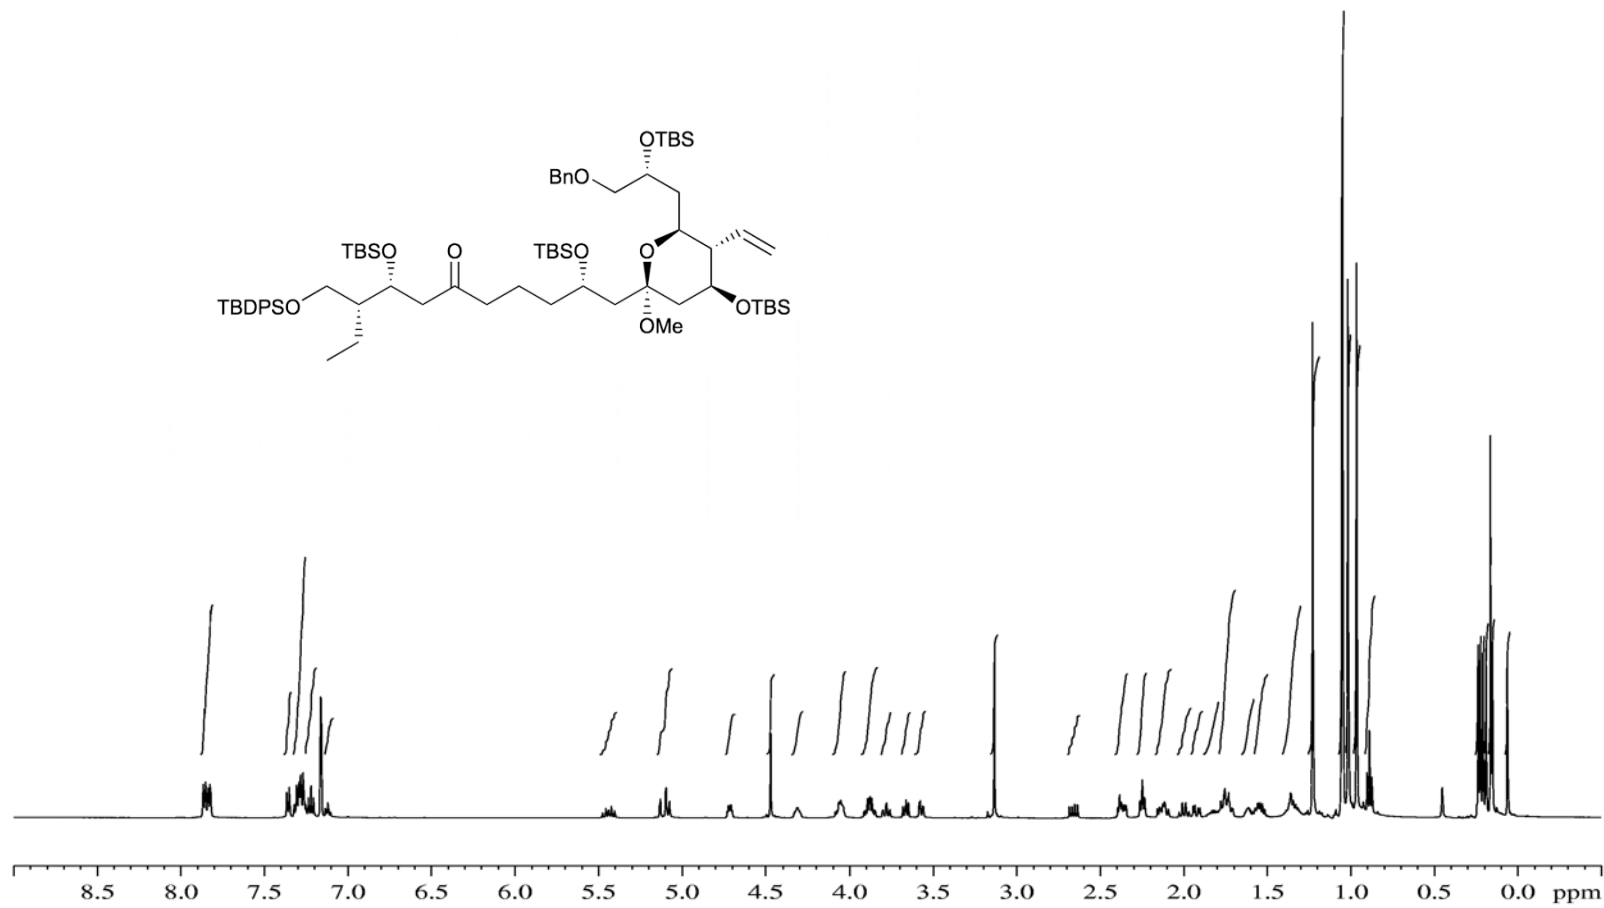

The <sup>1</sup>H NMR Spectrum of Compound (-)-63 in C<sub>6</sub>D<sub>6</sub>



S239

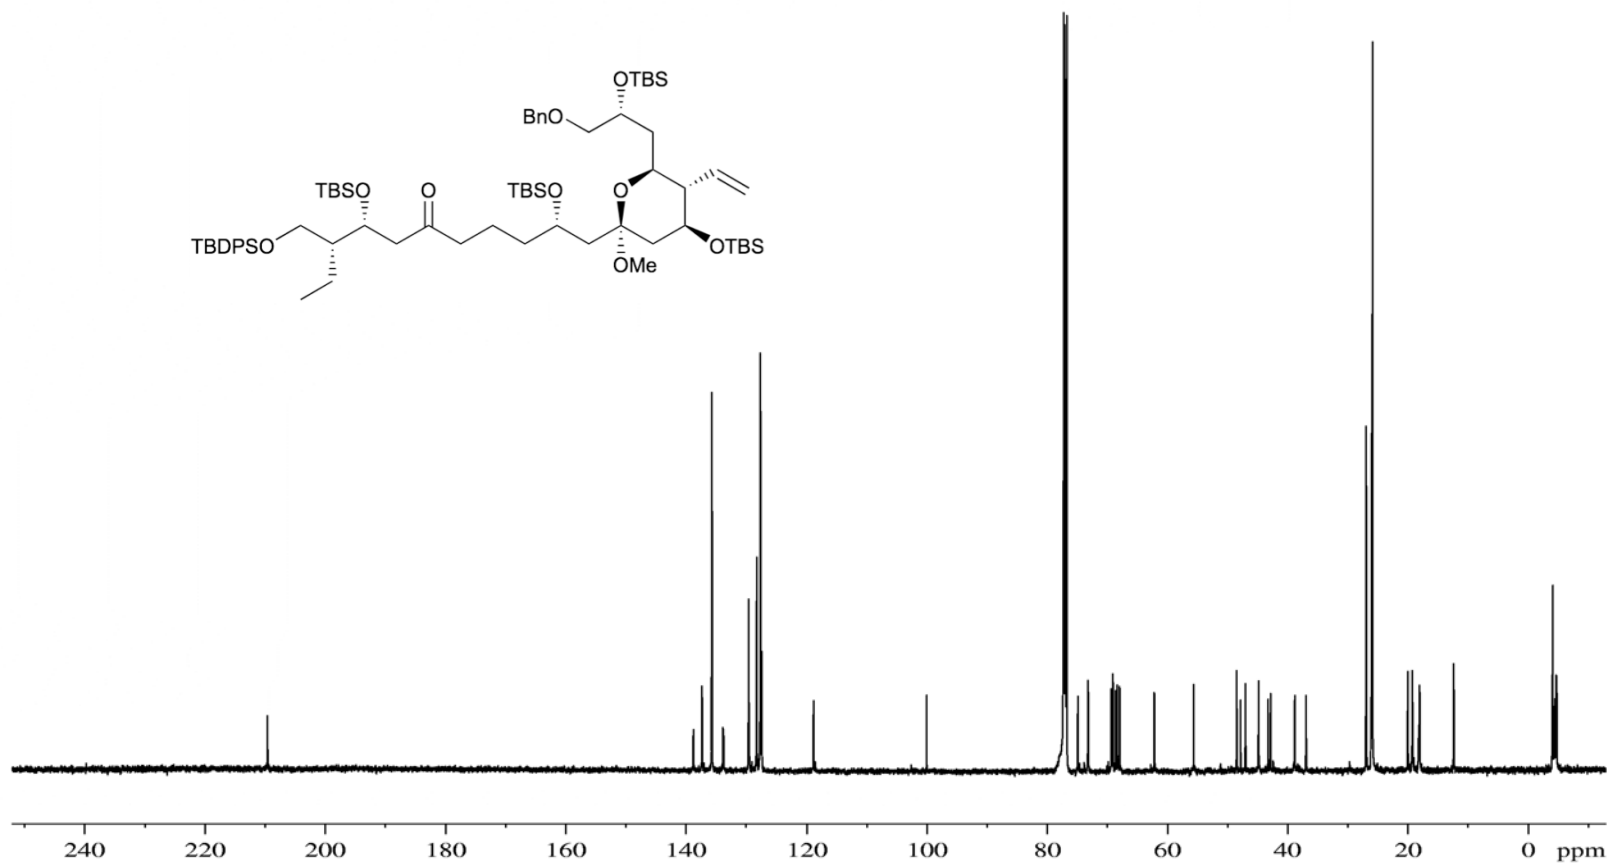

The  $^{13}\text{C}$  NMR Spectrum of Compound (-)-63 in  $\text{CDCl}_3$

S240

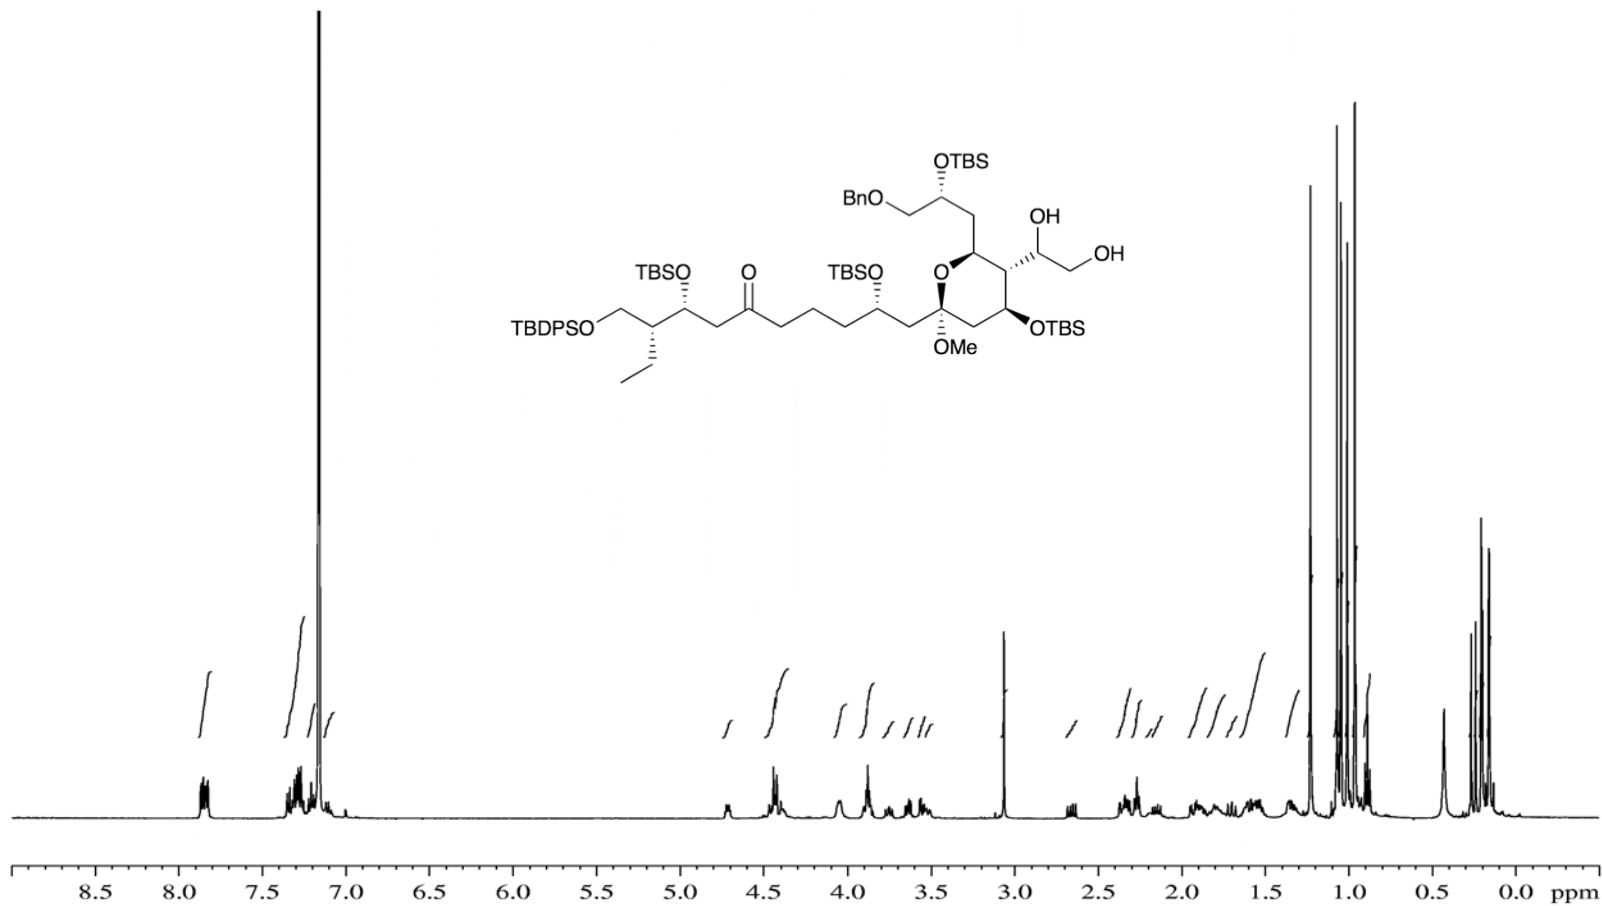

The <sup>1</sup>H NMR Spectrum of Compound (-)-S25 in C<sub>6</sub>D<sub>6</sub>

S241

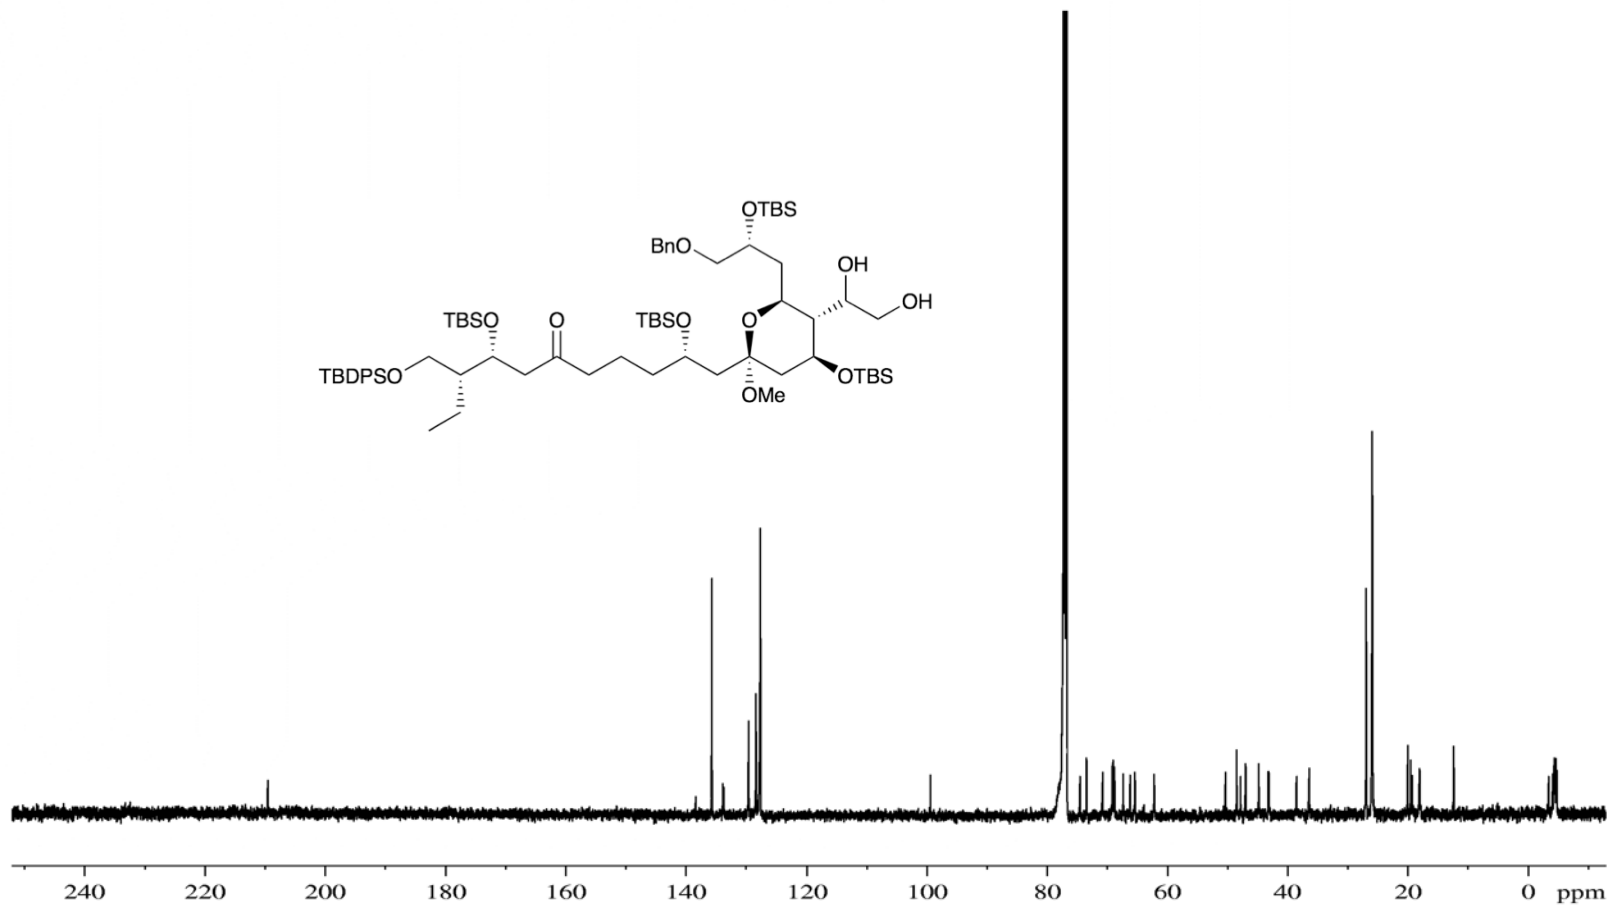

The <sup>13</sup>C NMR Spectrum of Compound (-)-S25 in CDCl<sub>3</sub>

S242

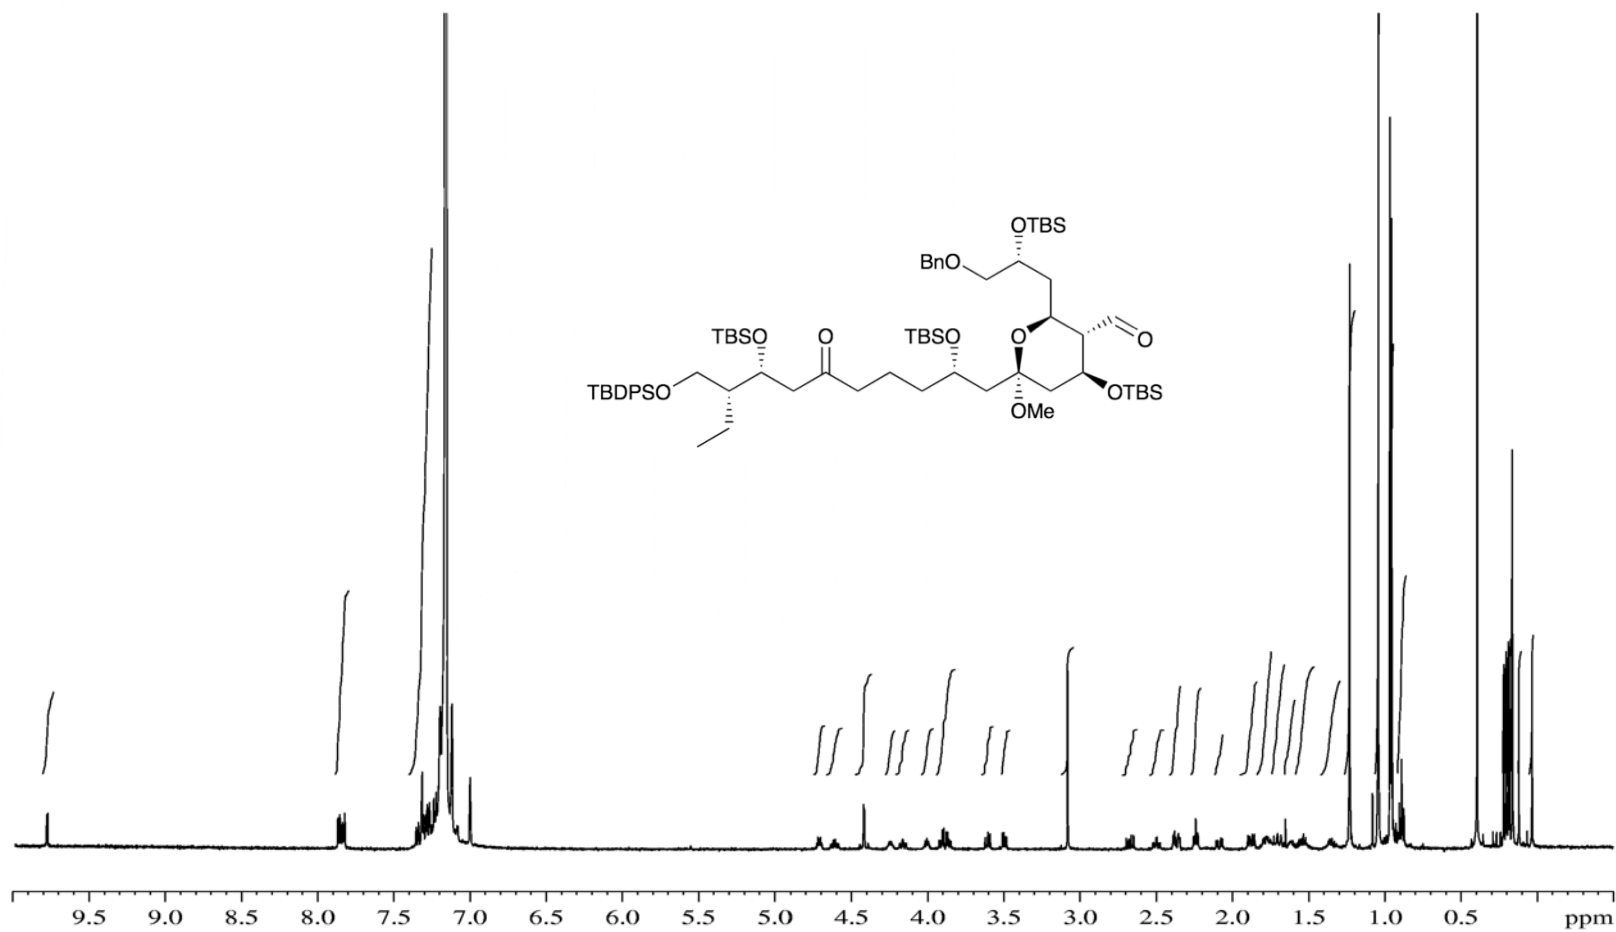

The <sup>1</sup>H NMR Spectrum of Compound (-)-64 in C<sub>6</sub>D<sub>6</sub>

S243

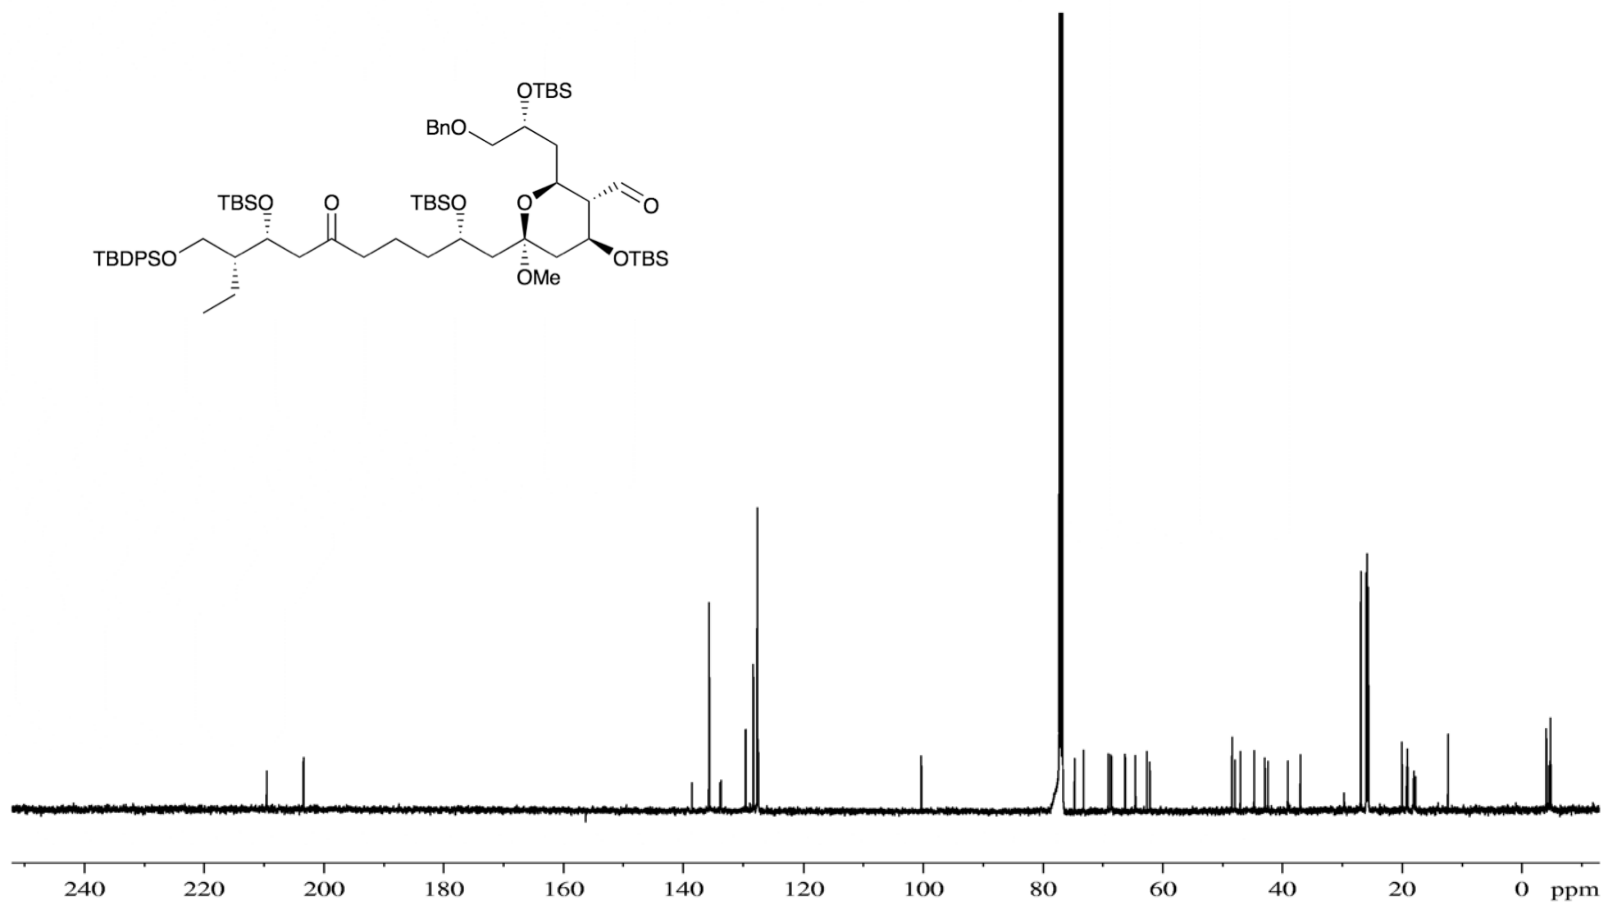

The <sup>13</sup>C NMR Spectrum of Compound (-)-64 in CDCl<sub>3</sub>

S244

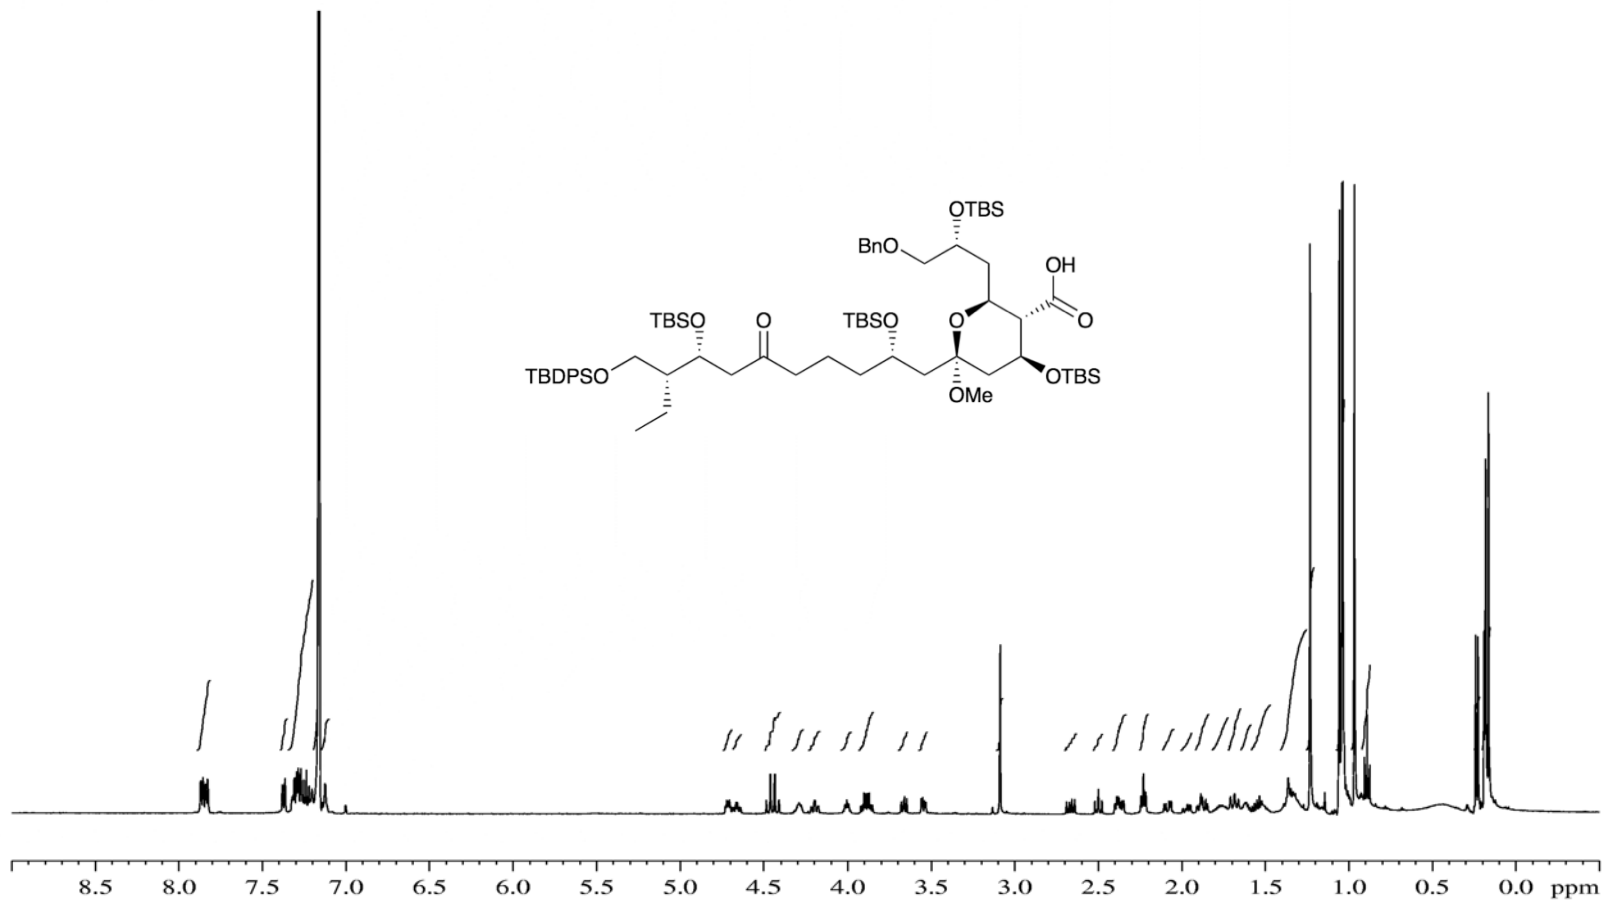

The <sup>1</sup>H NMR Spectrum of Compound (-)-S26 in C<sub>6</sub>D<sub>6</sub>

S245

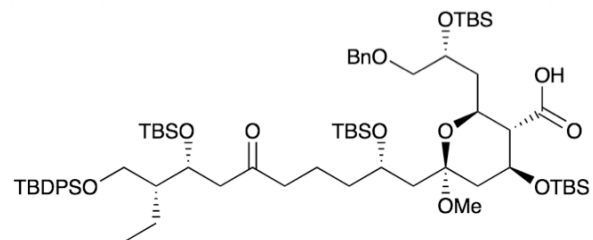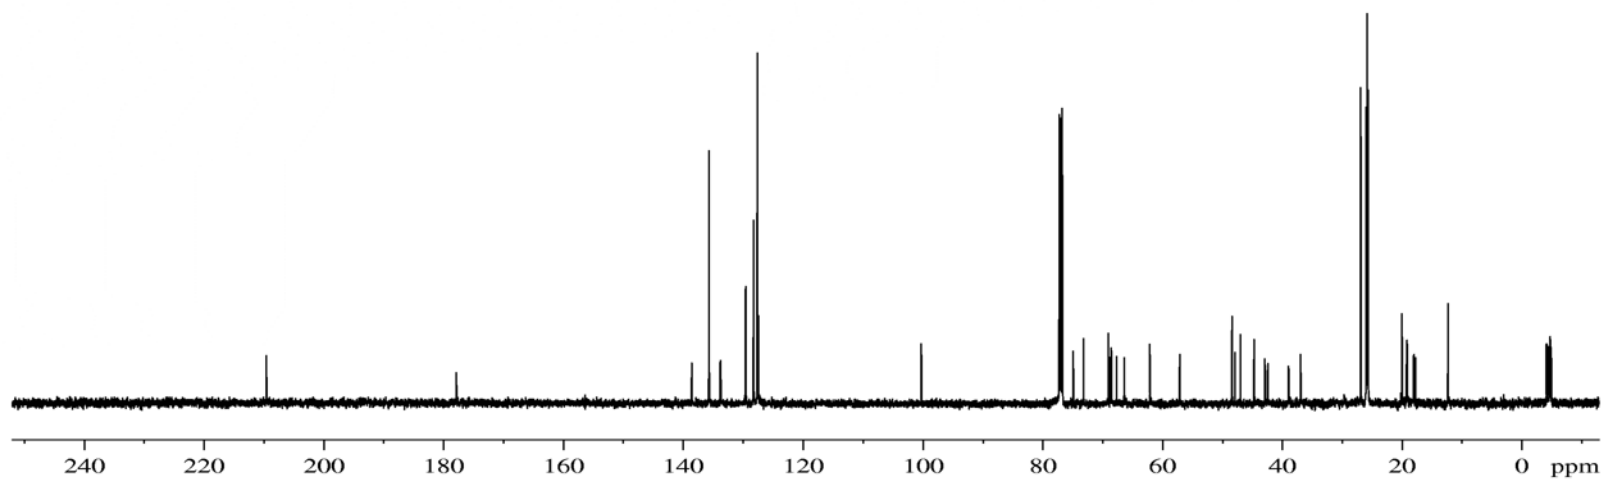

The  $^{13}\text{C}$  NMR Spectrum of Compound (-)-S26 in  $\text{CDCl}_3$

S246

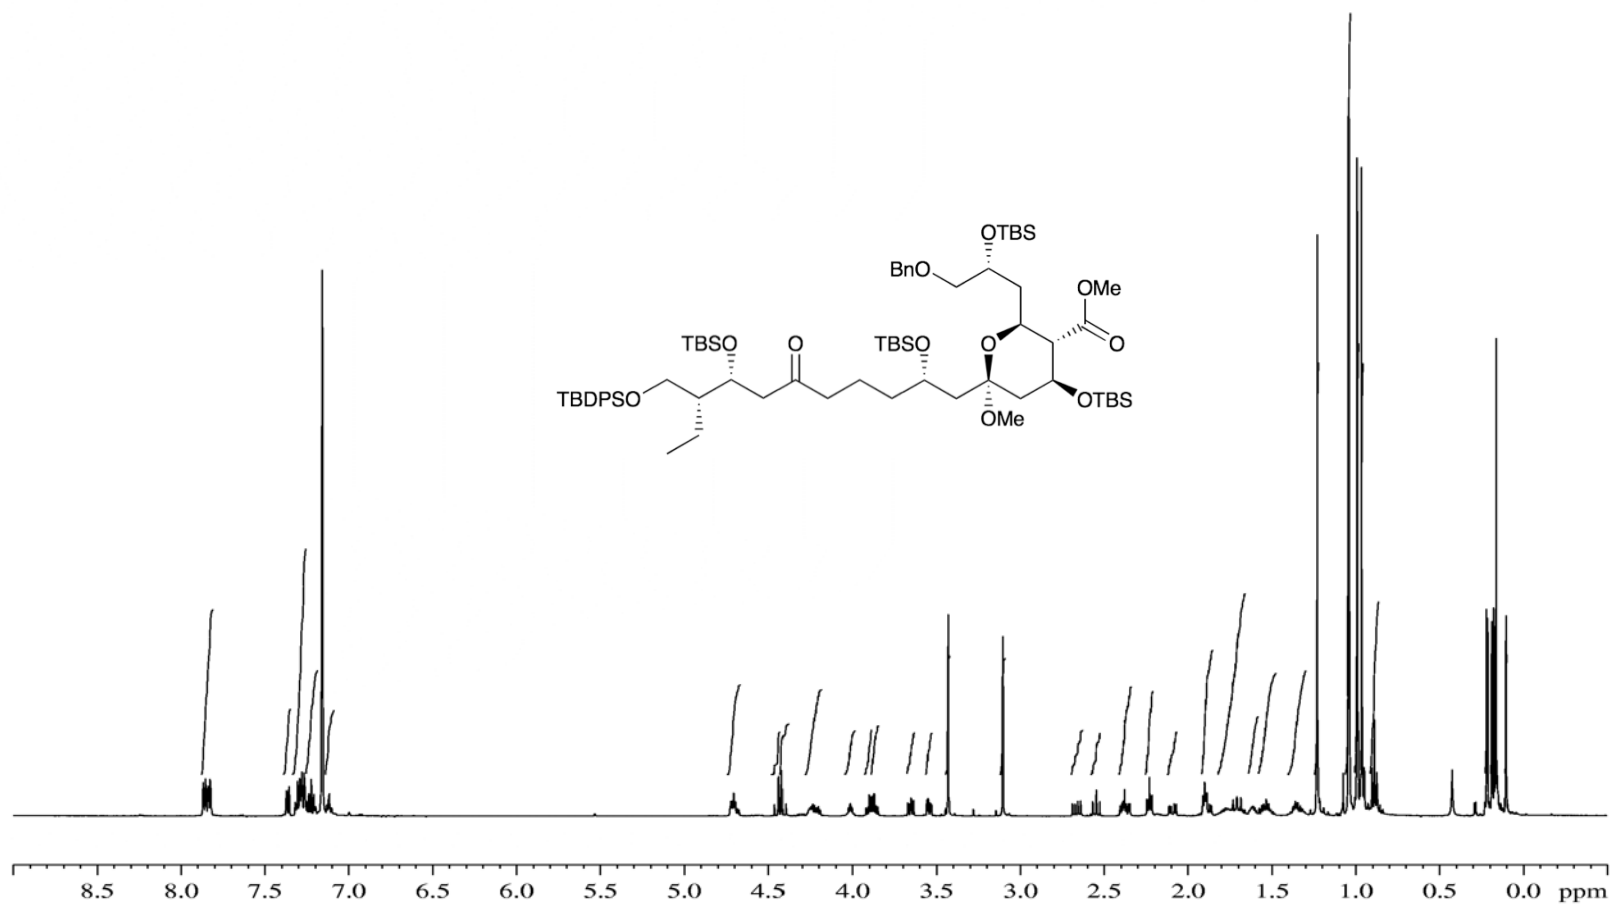

The <sup>1</sup>H NMR Spectrum of Compound (-)-65 in C<sub>6</sub>D<sub>6</sub>



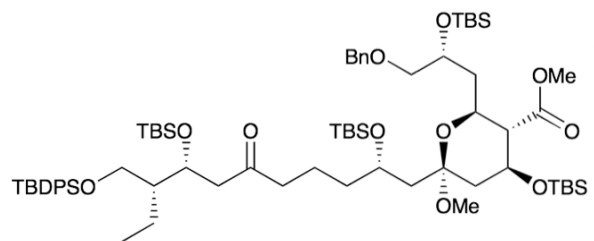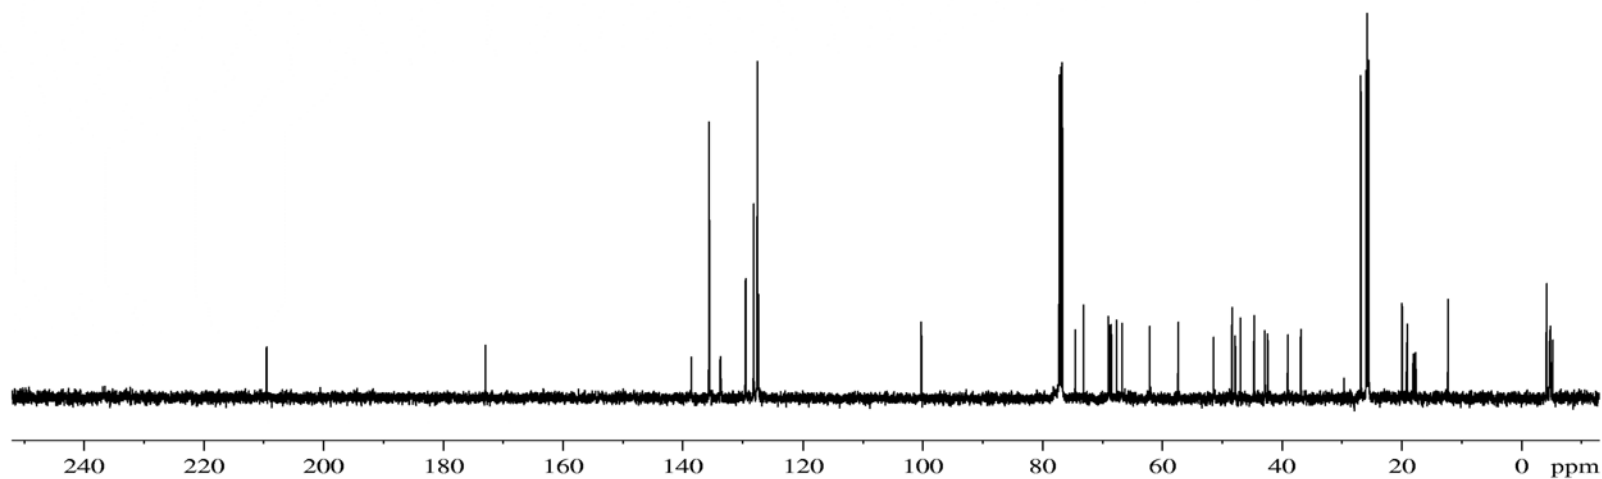

The  $^{13}\text{C}$  NMR Spectrum of Compound (-)-**65** in  $\text{CDCl}_3$

S248

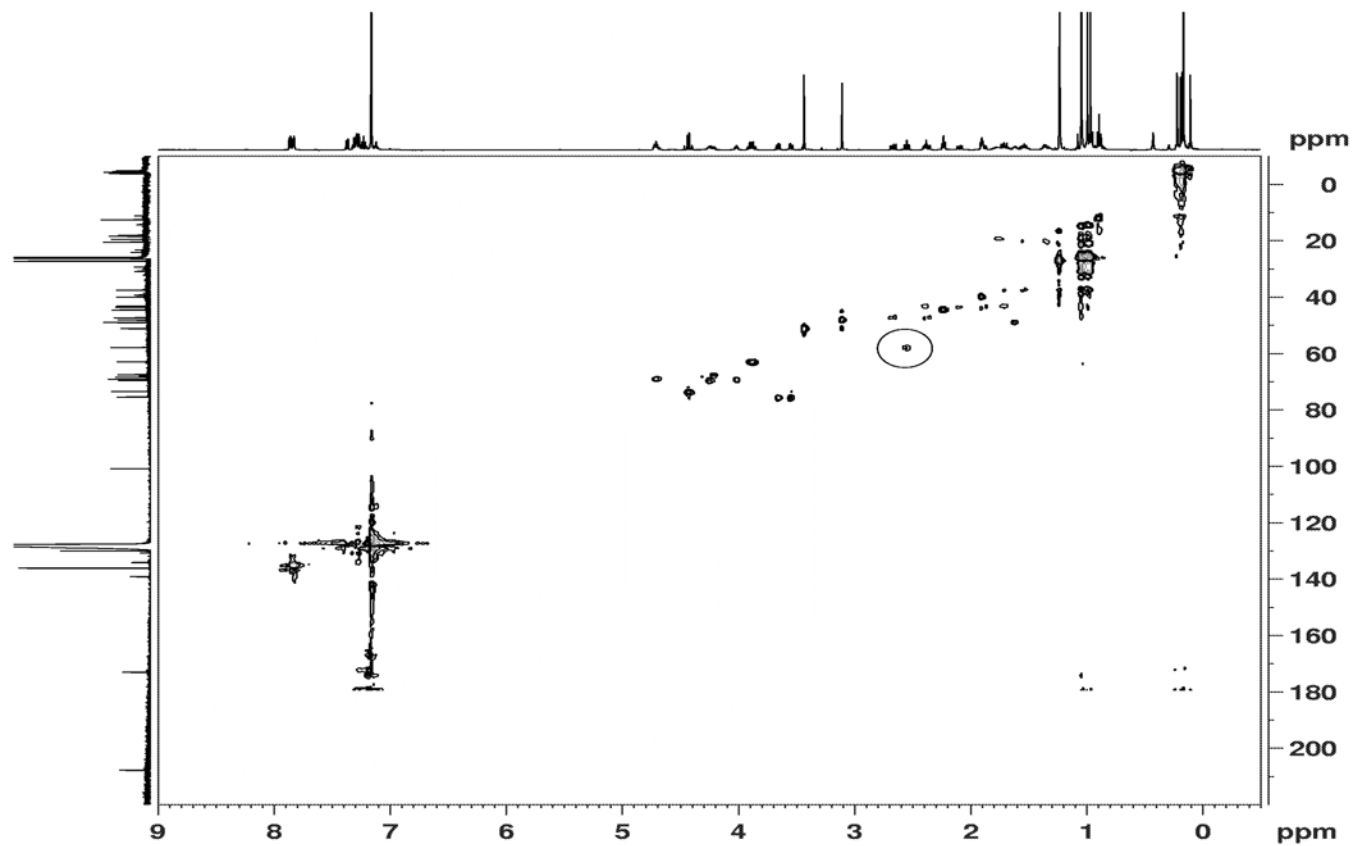

The HMQC Spectrum of Compound (-)-**65** in  $\text{C}_6\text{D}_6$

S249

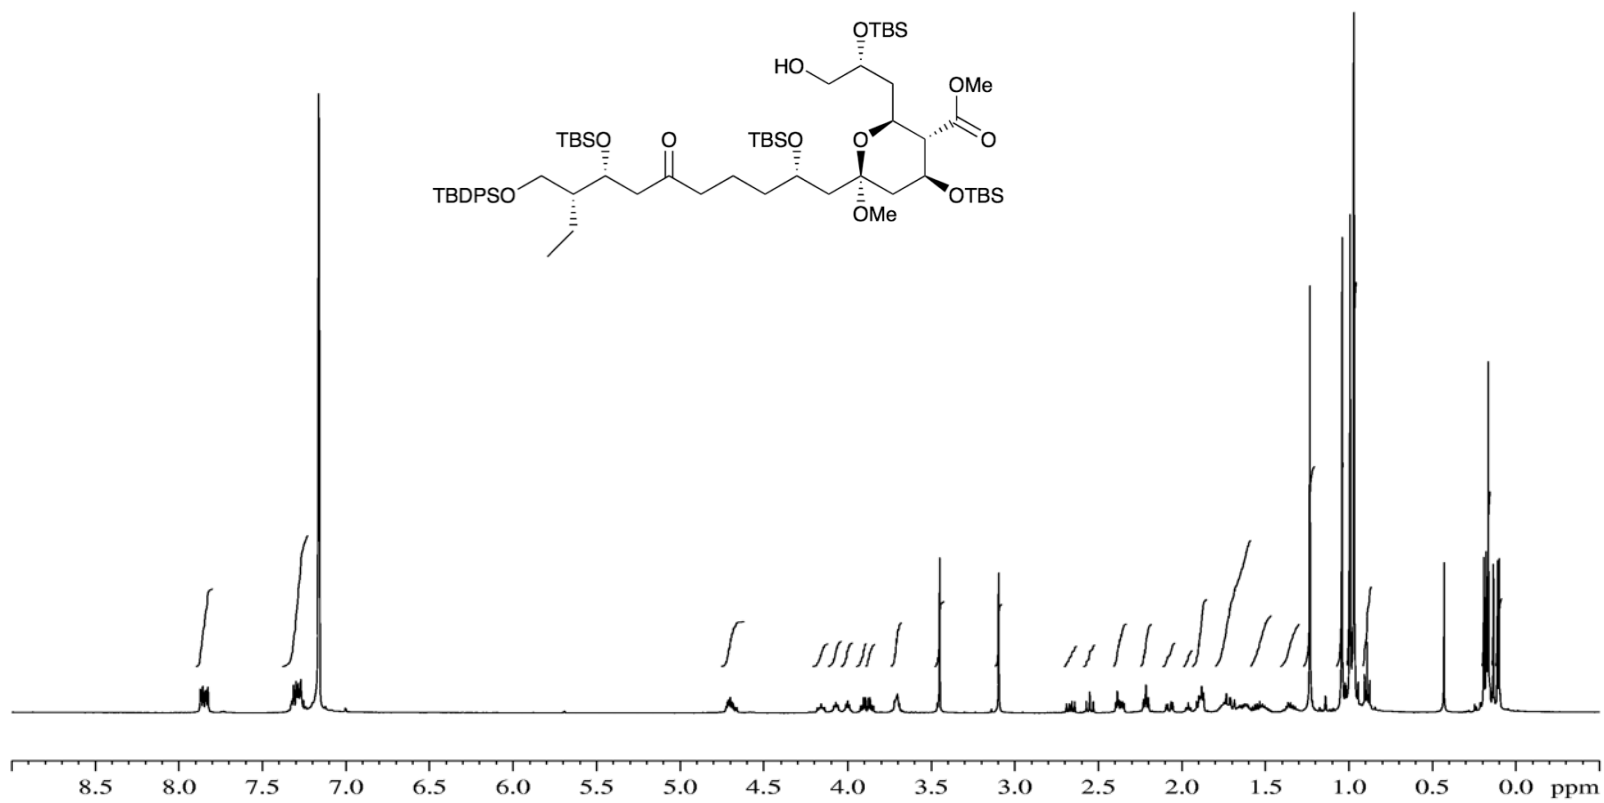

The  $^1\text{H}$  NMR Spectrum of Compound **(-)-66** in  $\text{C}_6\text{D}_6$

S250

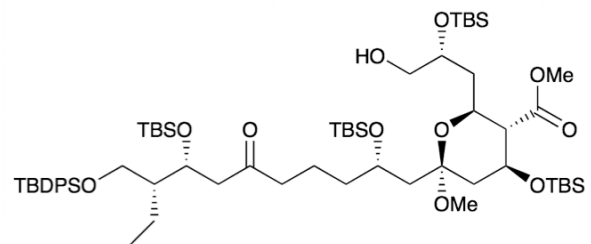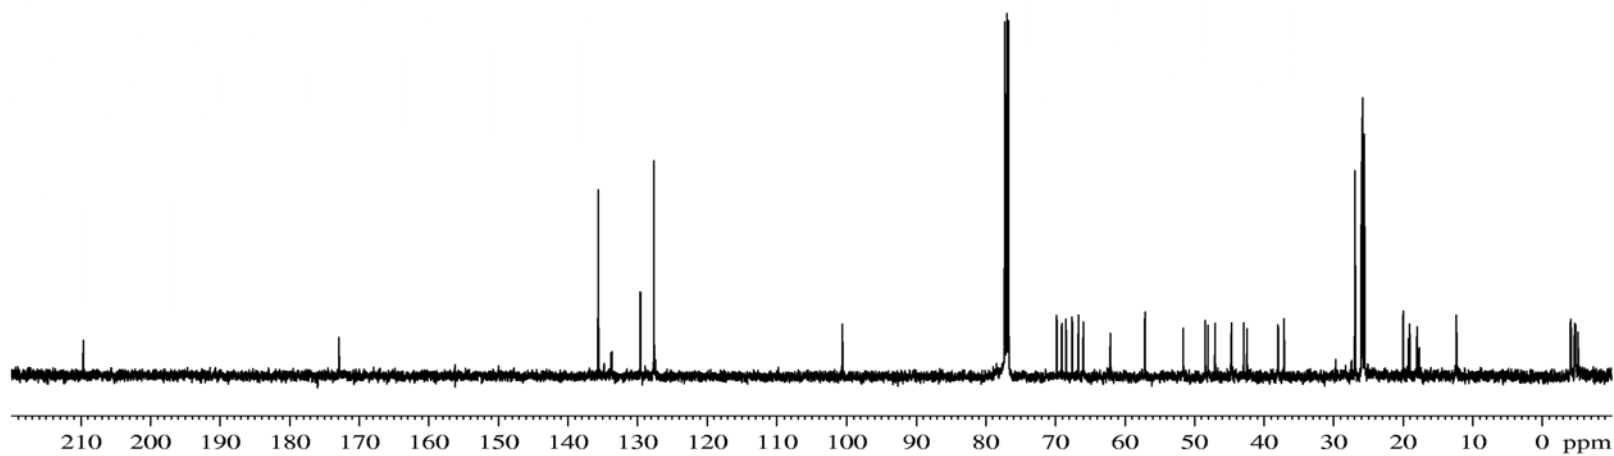

The  $^{13}\text{C}$  NMR Spectrum of Compound (-)-66 in  $\text{CDCl}_3$

S251

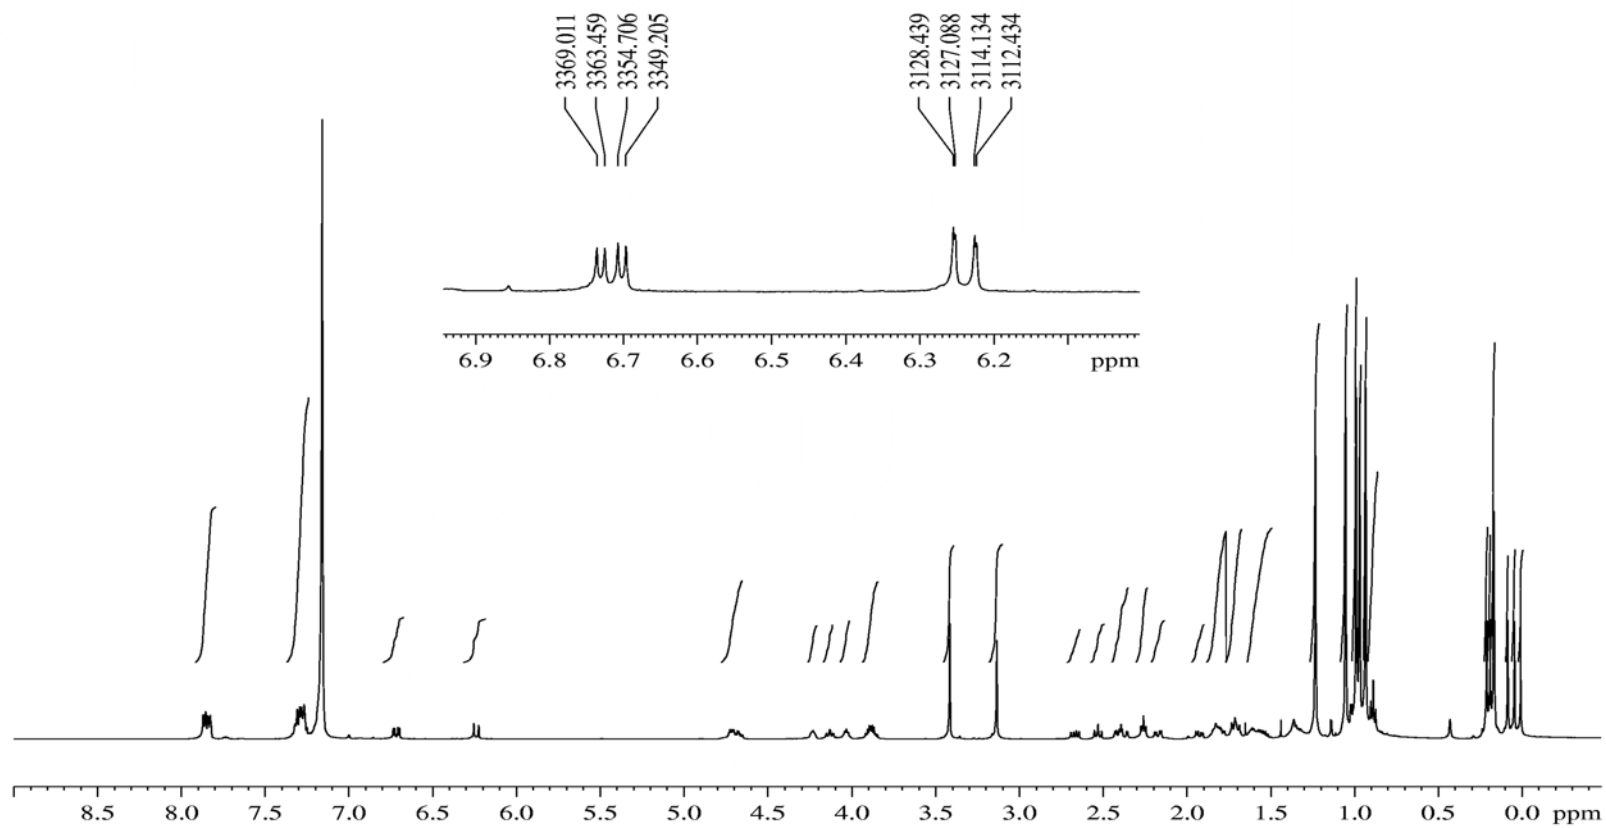

The  $^1\text{H}$  NMR Spectrum of Compound (-)-67 in  $\text{C}_6\text{D}_6$

S252

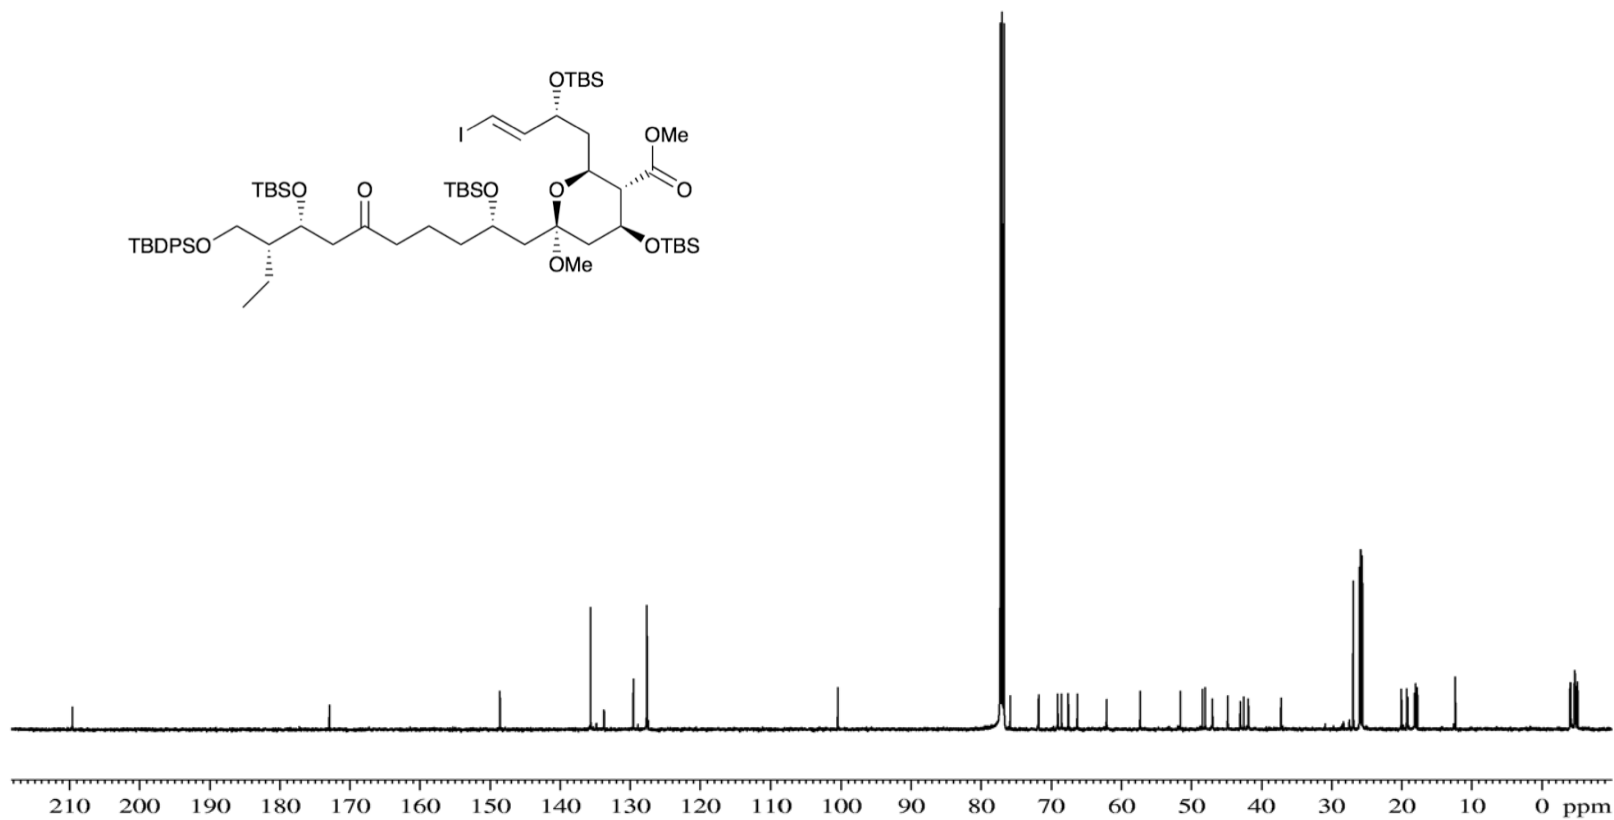

The <sup>13</sup>C NMR Spectrum of Compound (-)-67 in CDCl<sub>3</sub>

S253

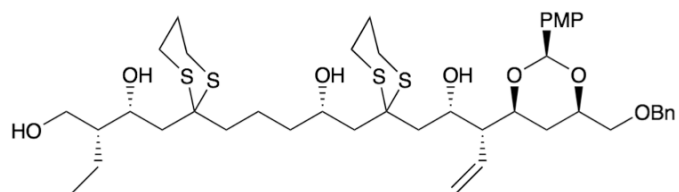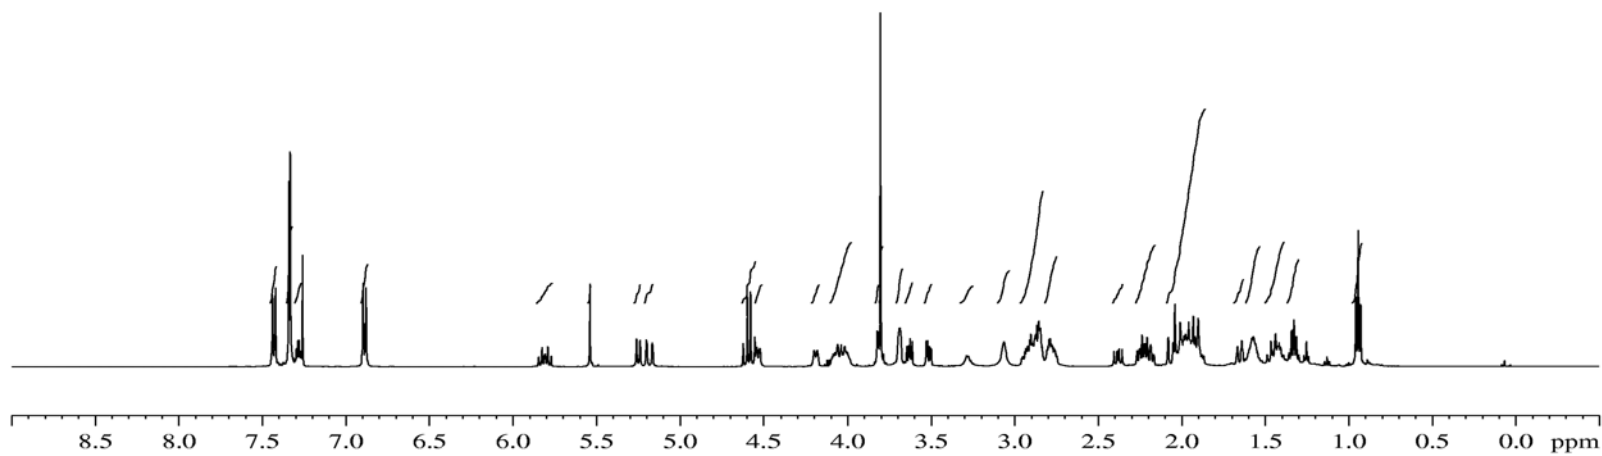

The <sup>1</sup>H NMR Spectrum of Compound (-)-**S27** in CDCl<sub>3</sub>

S254

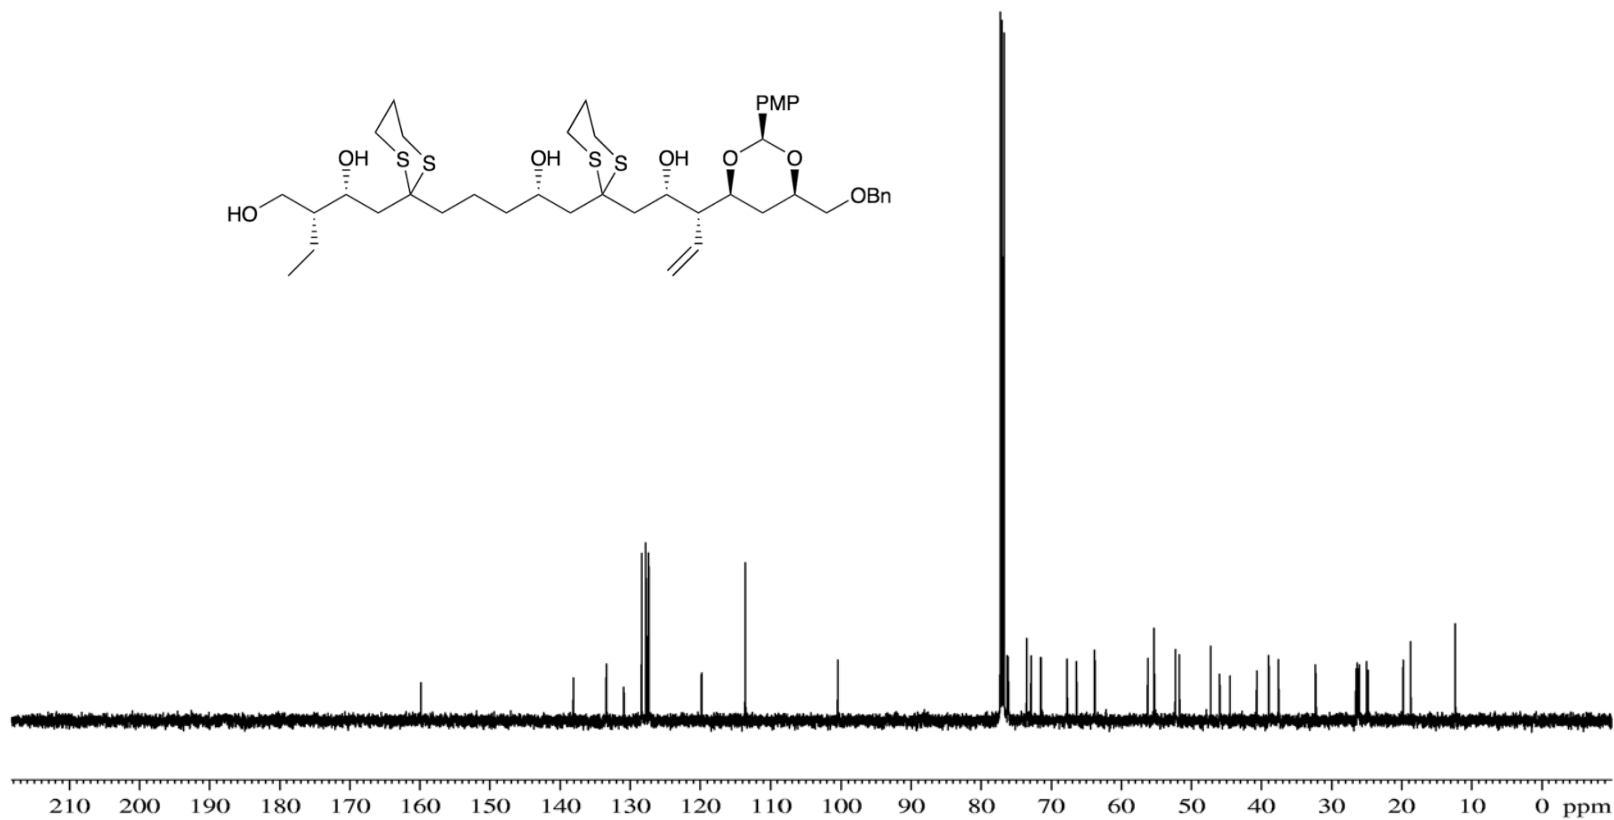

The  $^{13}\text{C}$  NMR Spectrum of Compound (-)-S27 in  $\text{CDCl}_3$



S255

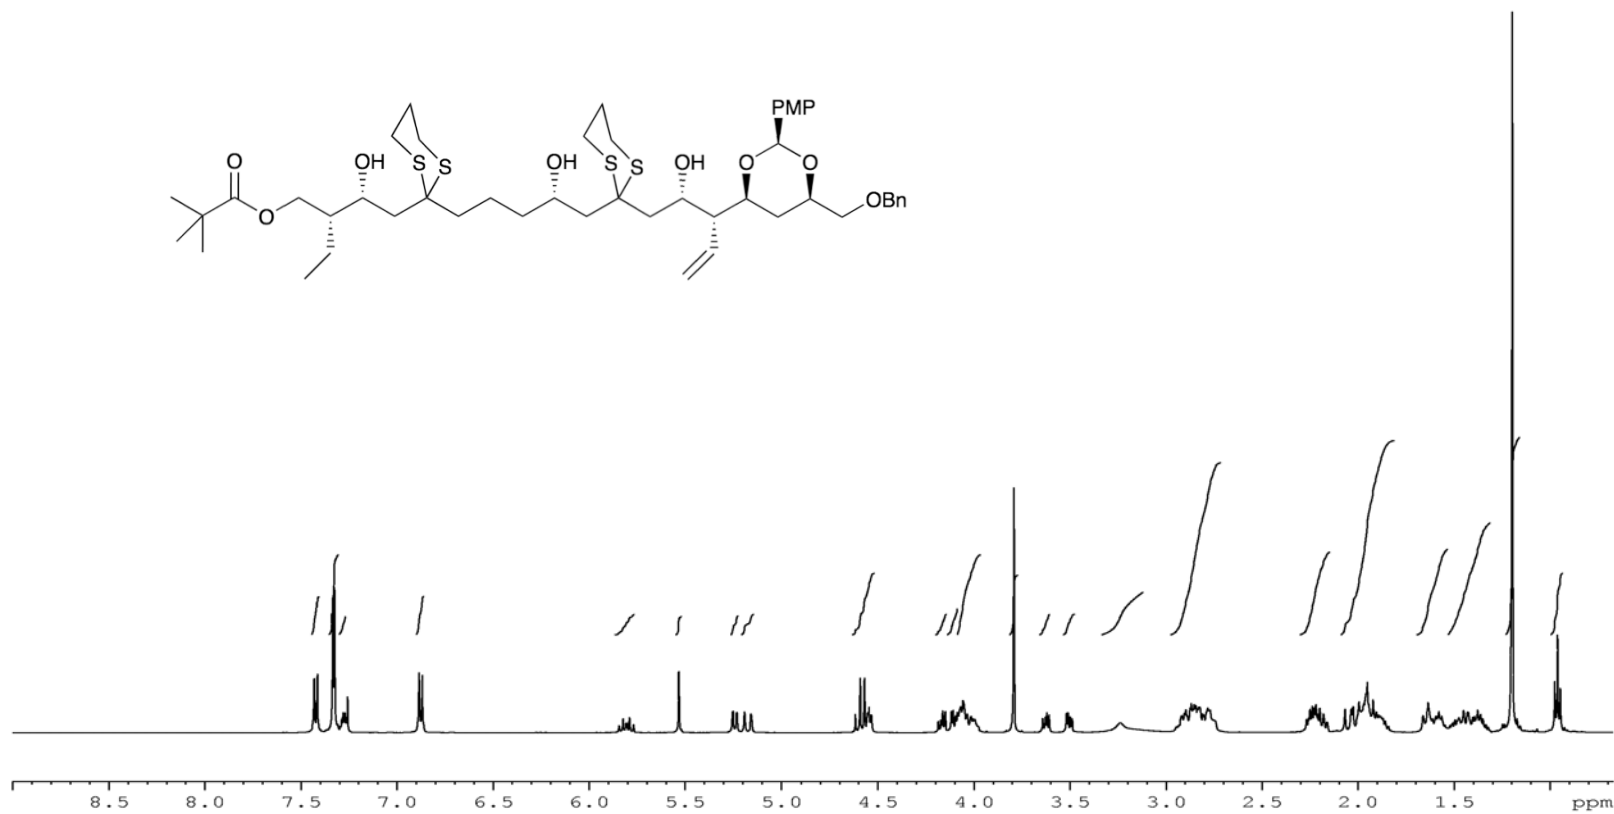

The  $^1\text{H}$  NMR Spectrum of Compound (-)-**S28** in  $\text{CDCl}_3$

S256

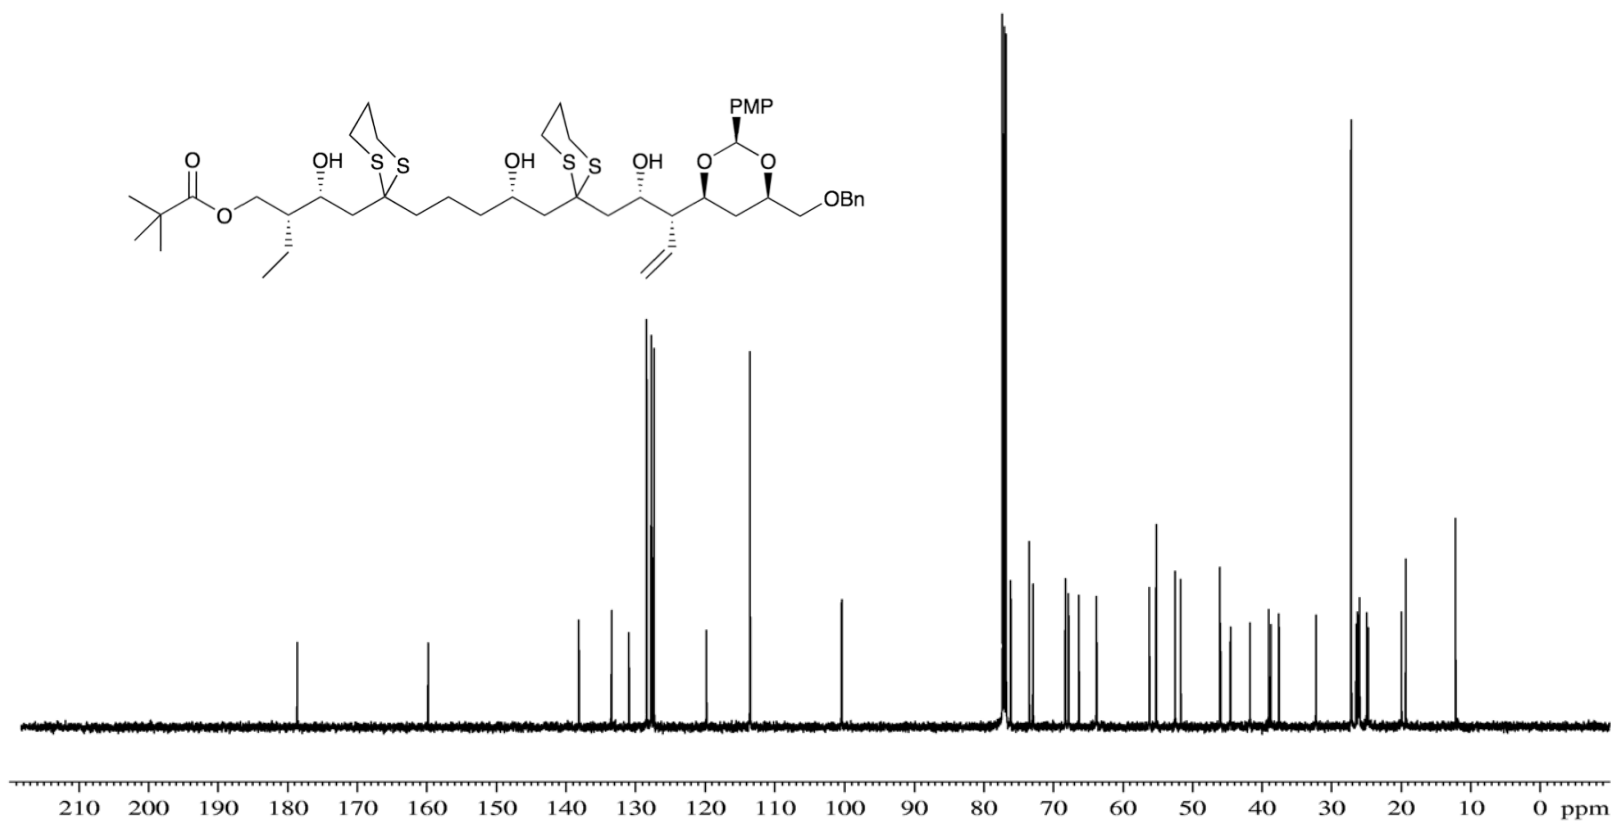

The <sup>13</sup>C NMR Spectrum of Compound (-)-S28 in CDCl<sub>3</sub>

S257

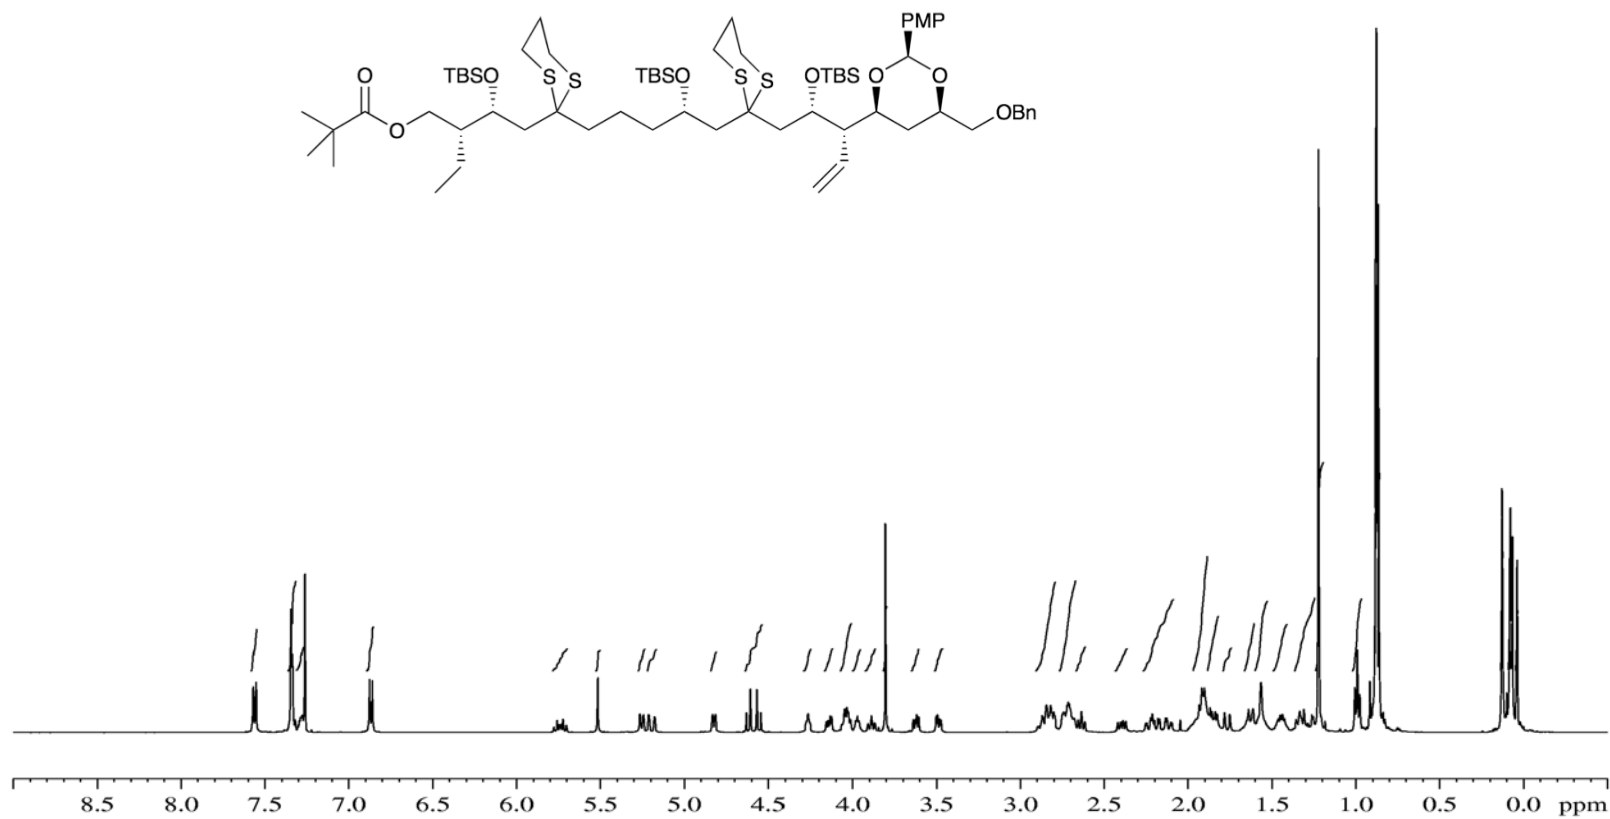

The <sup>1</sup>H NMR Spectrum of Compound (-)-69 in CDCl<sub>3</sub>

S258

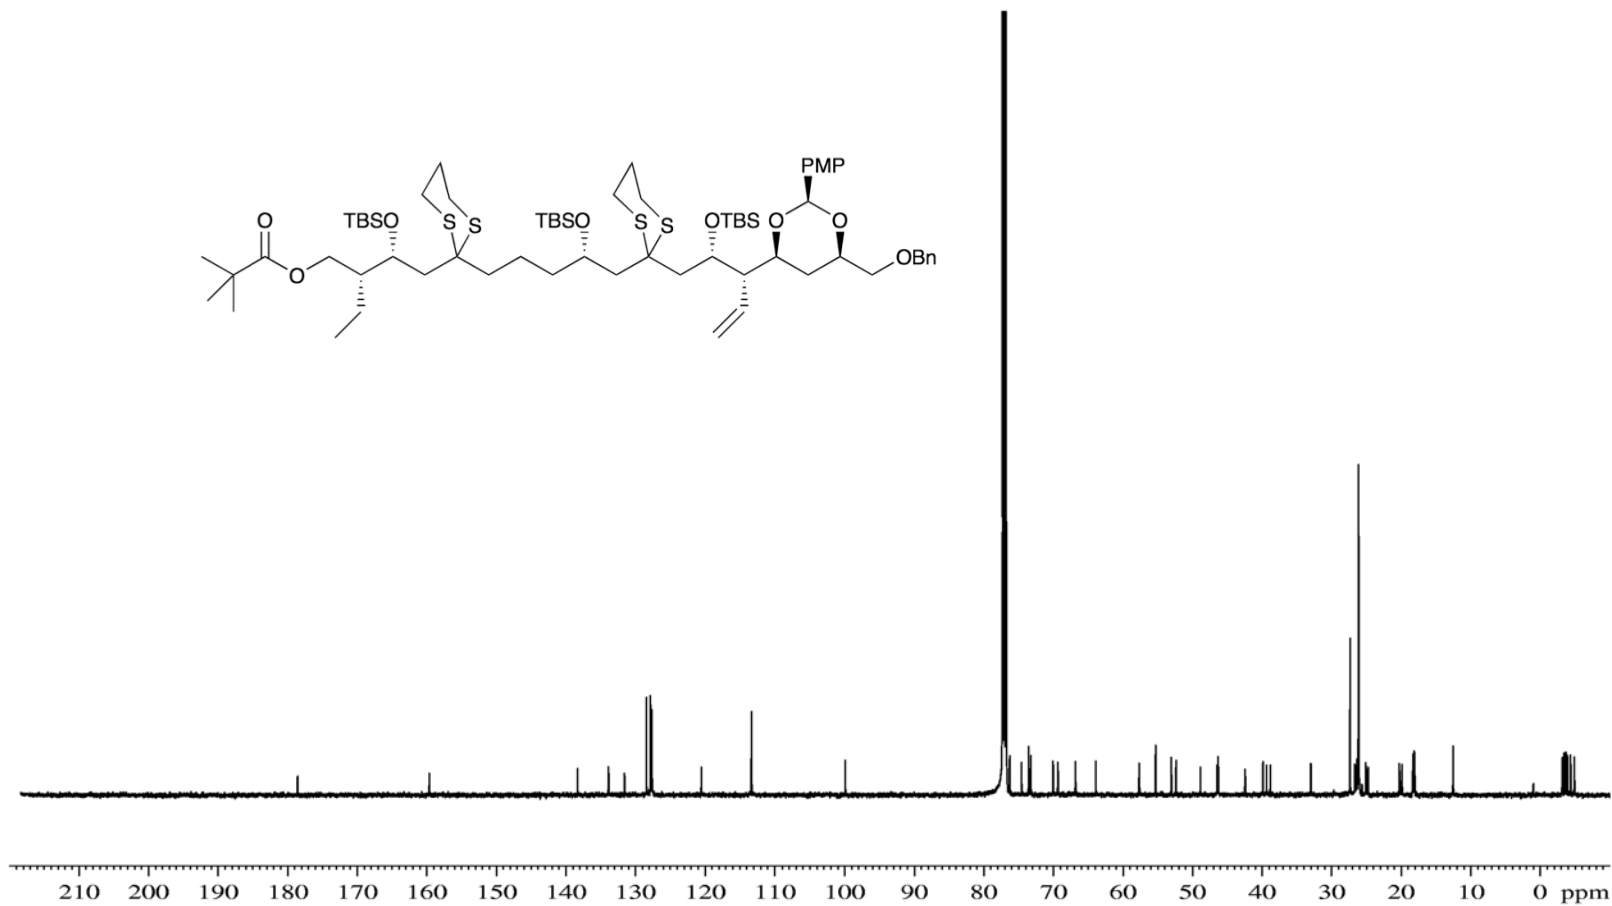

The <sup>13</sup>C NMR Spectrum of Compound (-)-69 in CDCl<sub>3</sub>

S259

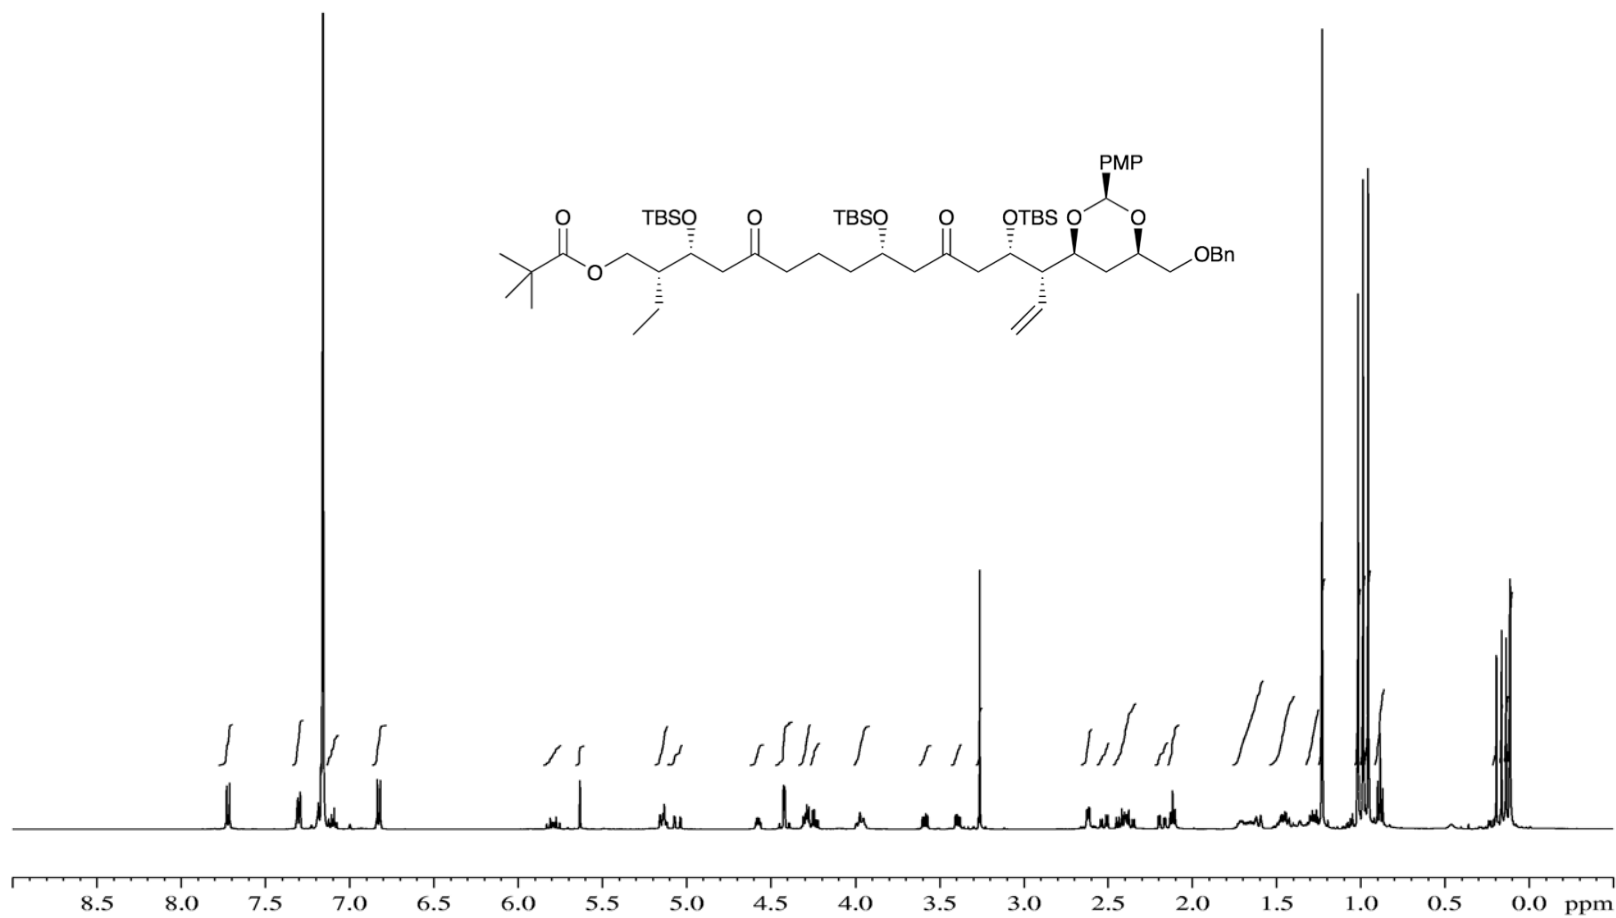

The <sup>1</sup>H NMR Spectrum of Compound (+)-S29 in C<sub>6</sub>D<sub>6</sub>

S260

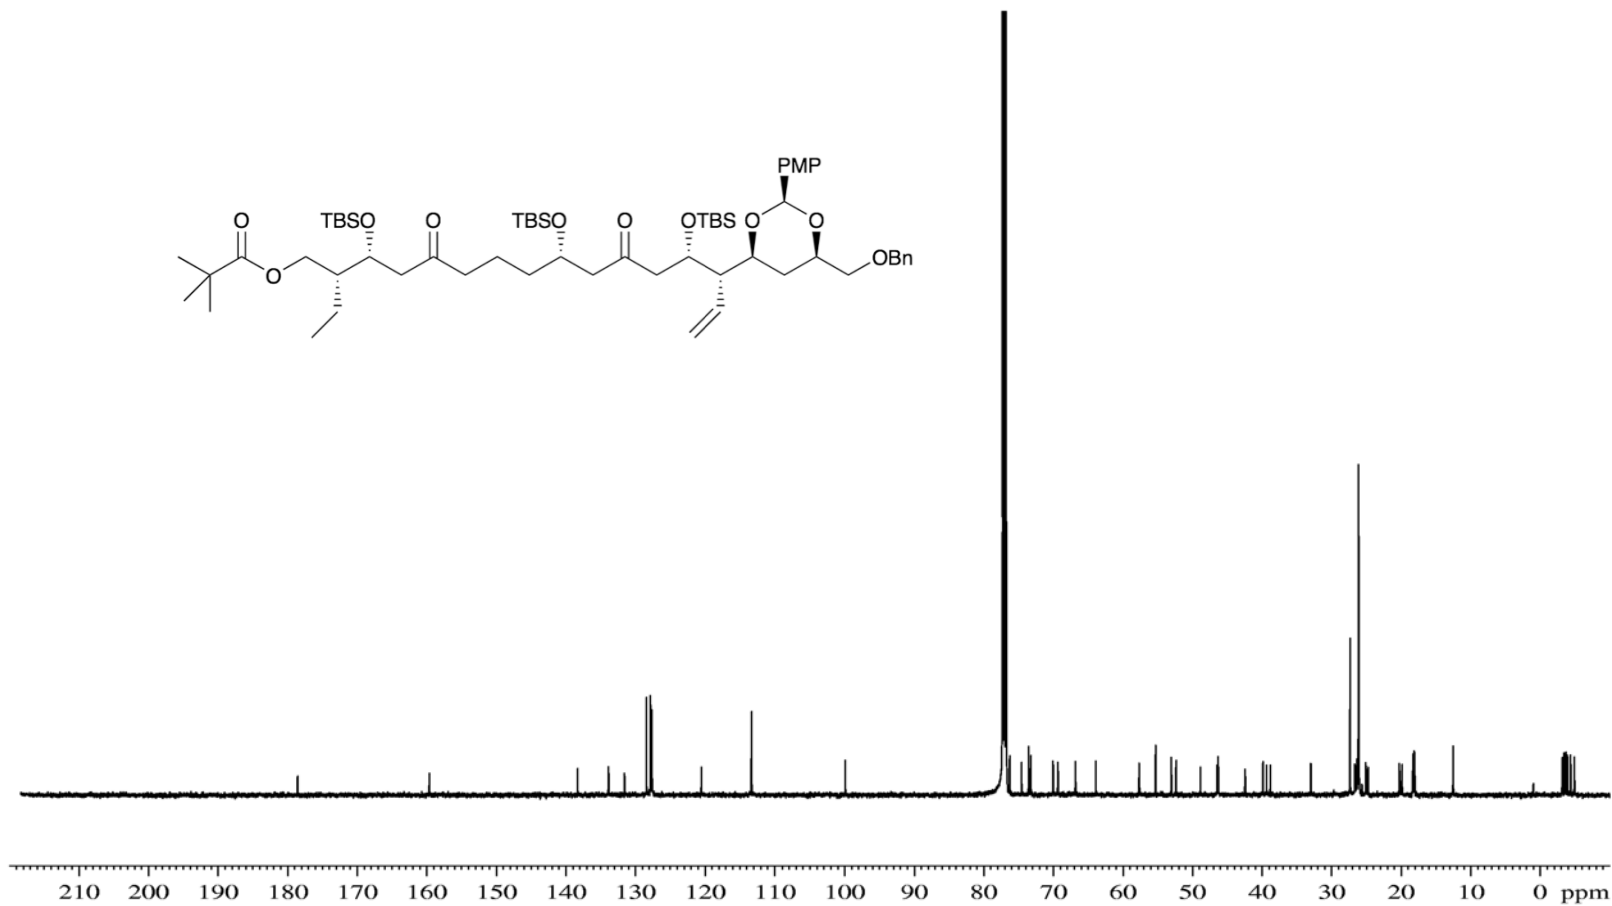

The  $^{13}\text{C}$  NMR Spectrum of Compound (+)-S29 in  $\text{CDCl}_3$

S261

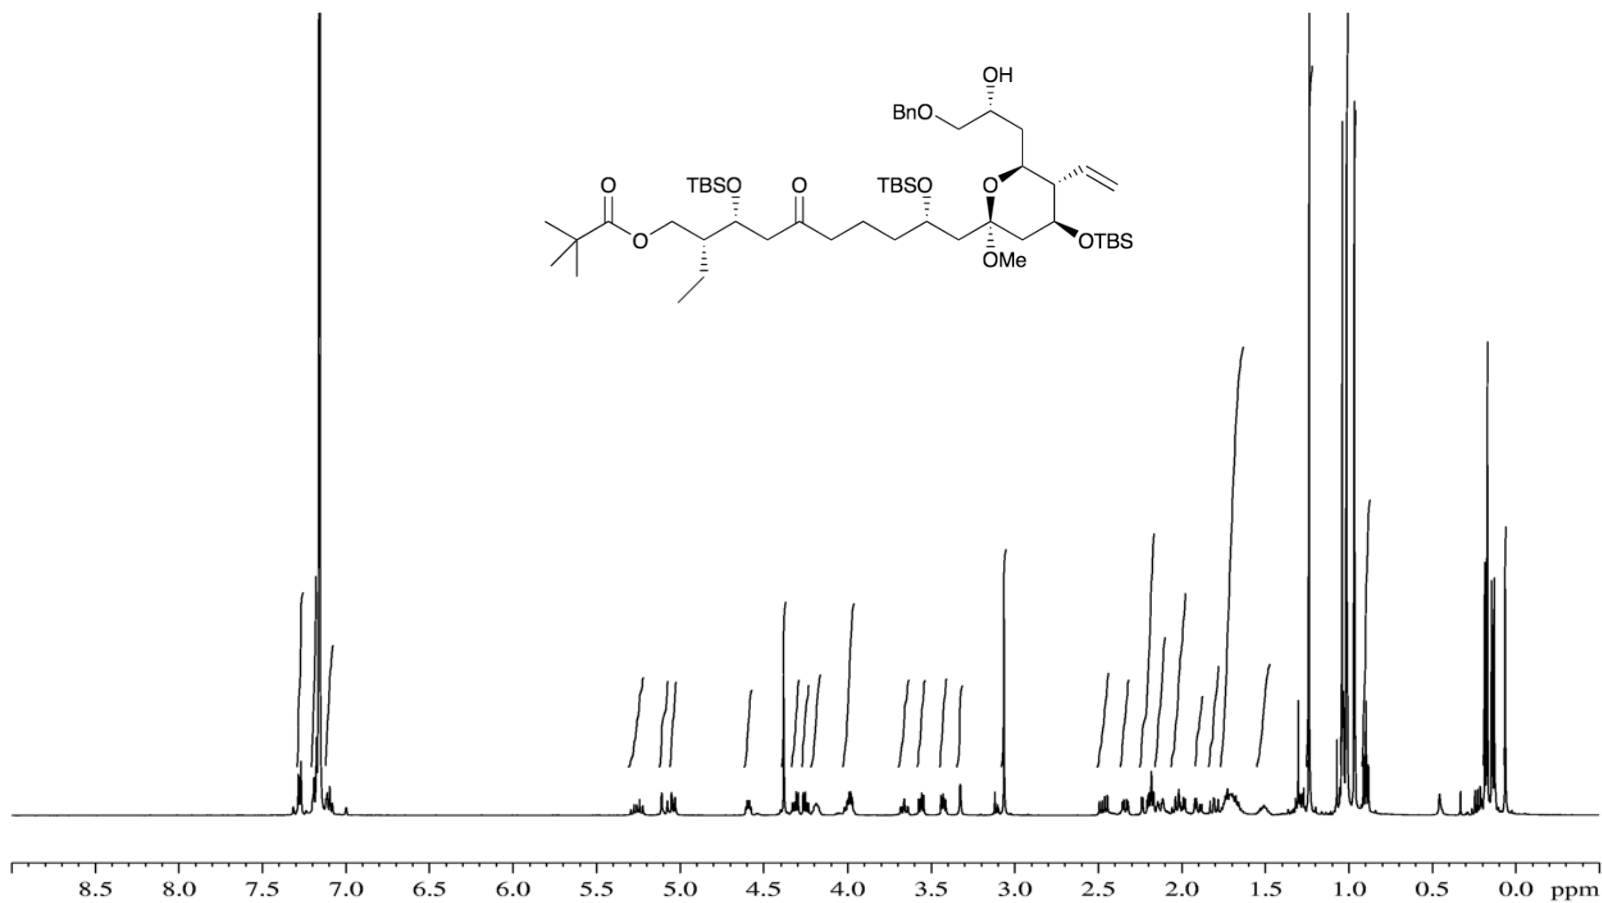

The  $^1\text{H}$  NMR Spectrum of Compound (-)-70 in  $\text{C}_6\text{D}_6$

S262

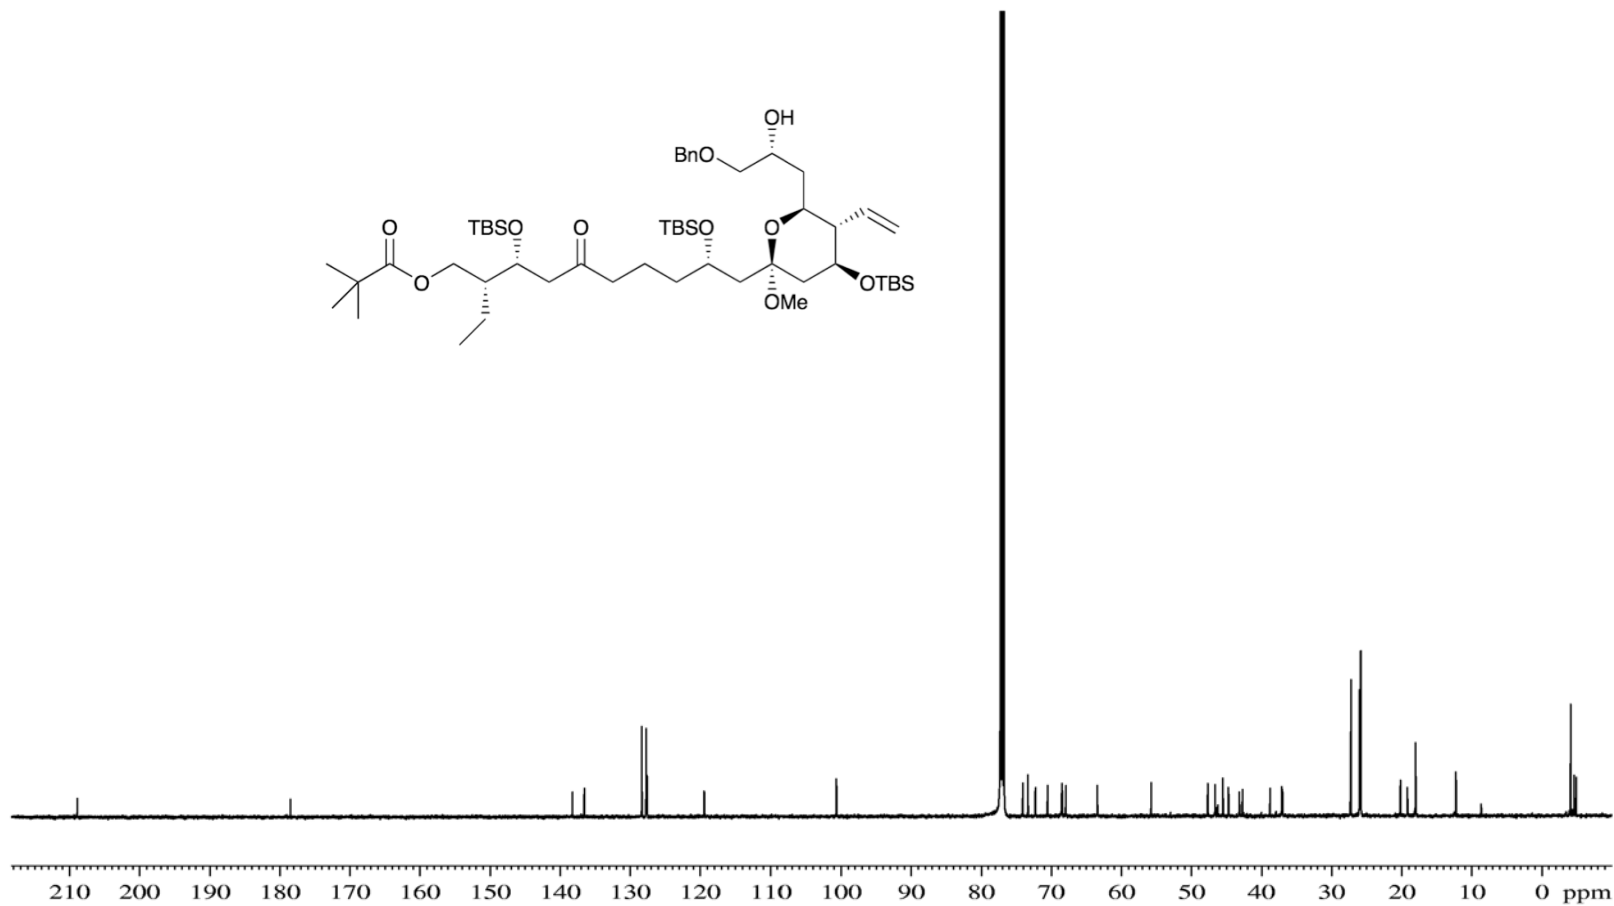

The  $^{13}\text{C}$  NMR Spectrum of Compound (-)-70 in  $\text{CDCl}_3$



S263

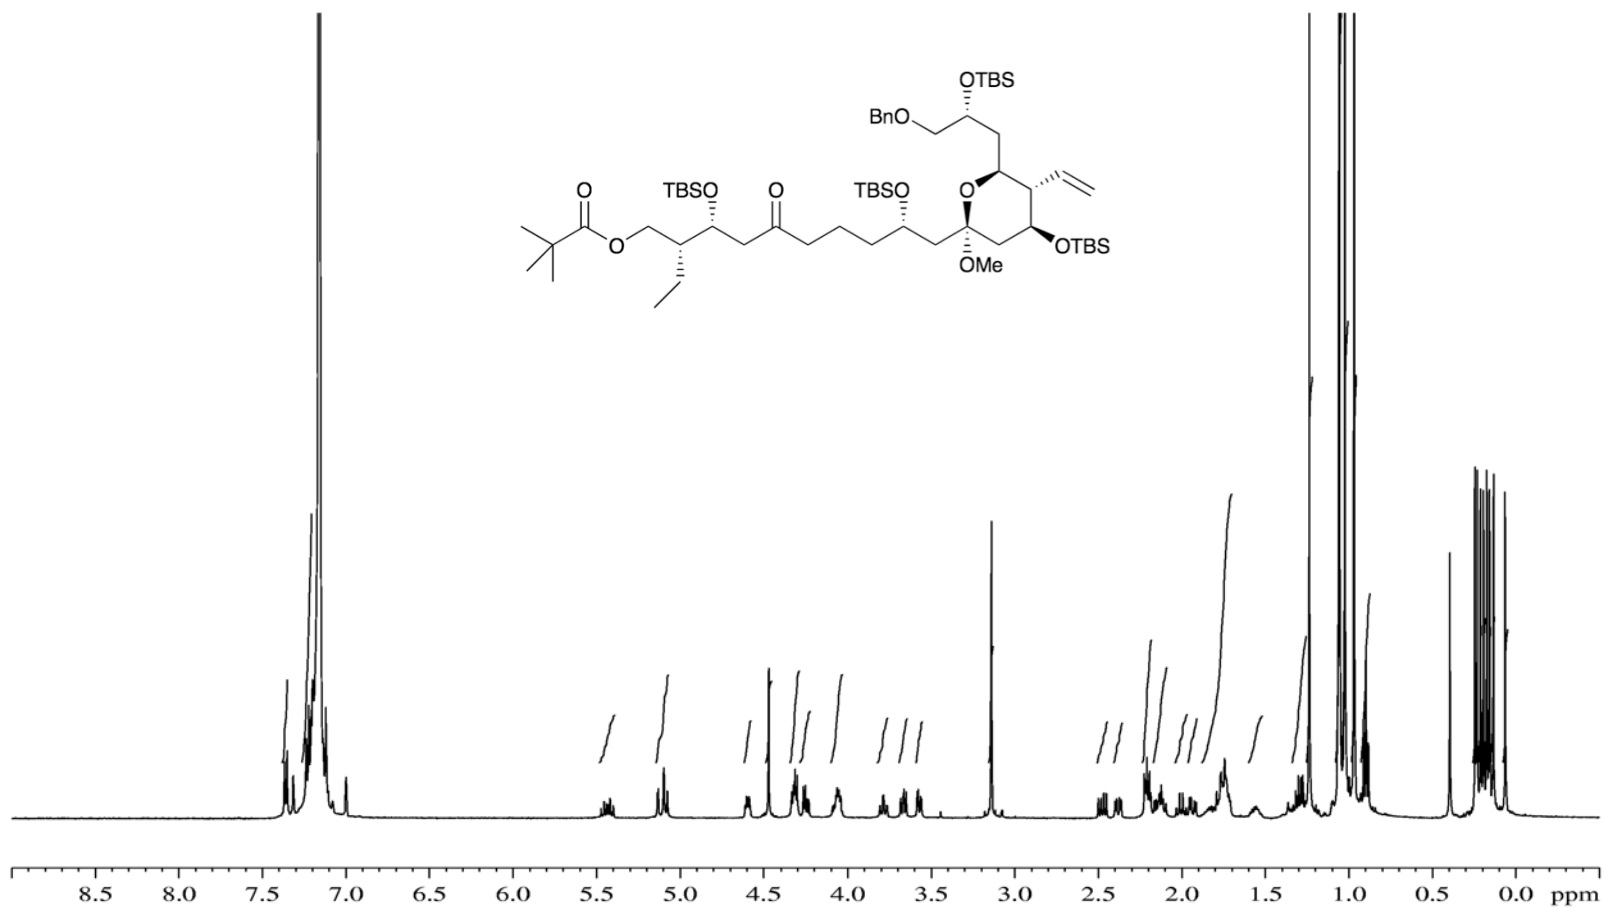

The  $^1\text{H}$  NMR Spectrum of Compound (-)-**S30** in  $\text{C}_6\text{D}_6$

S264

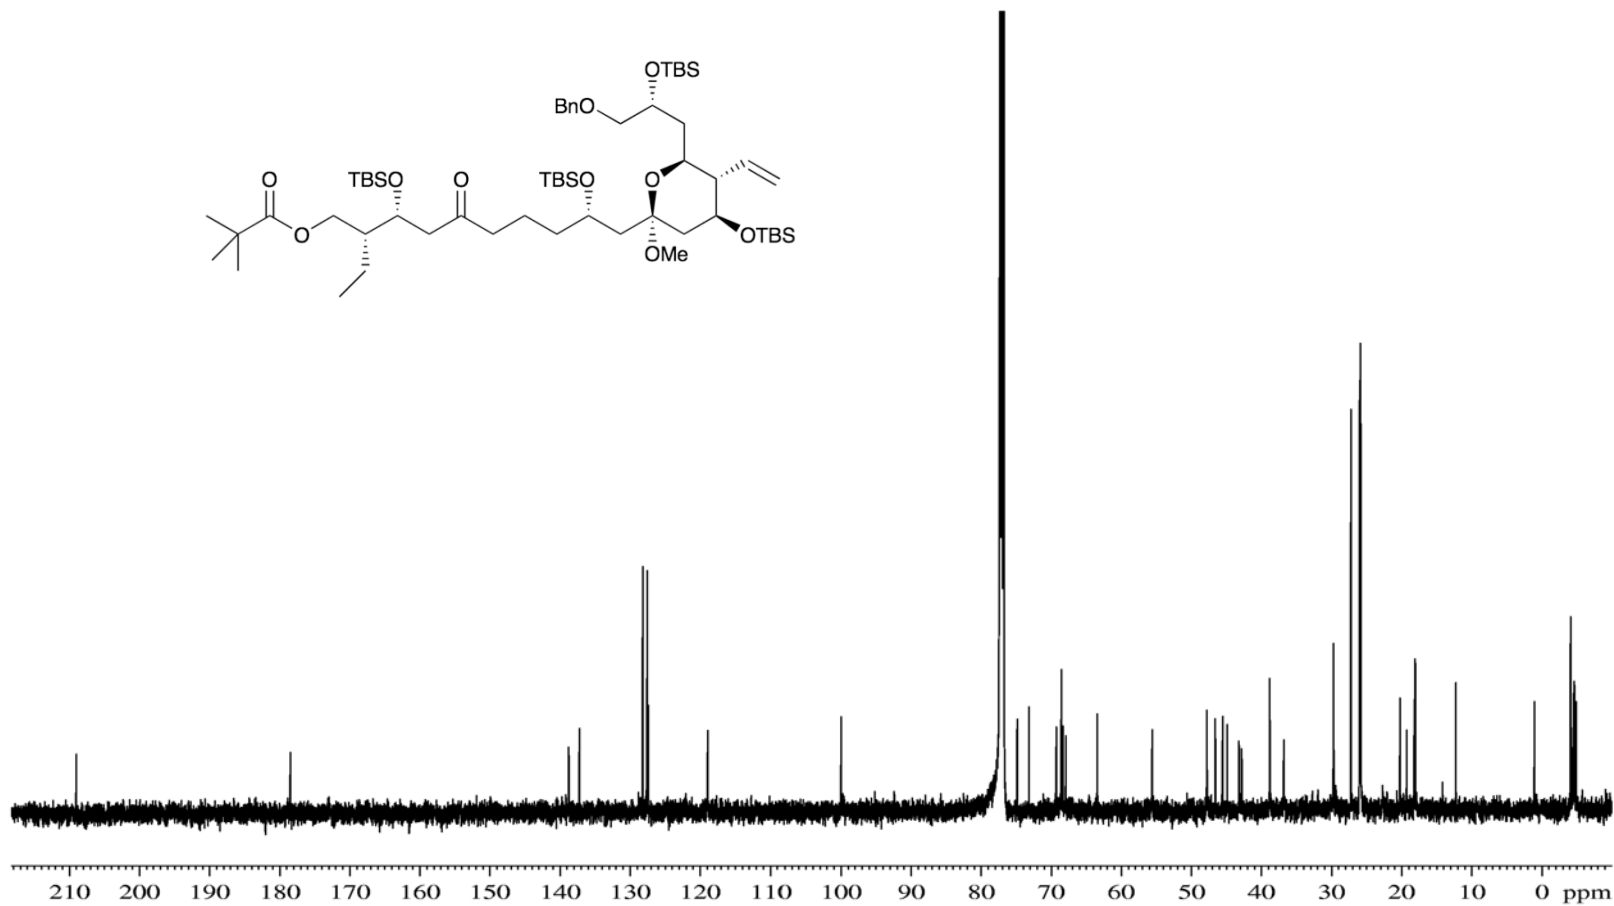

The <sup>13</sup>C NMR Spectrum of Compound (-)-S30 in CDCl<sub>3</sub>

S265

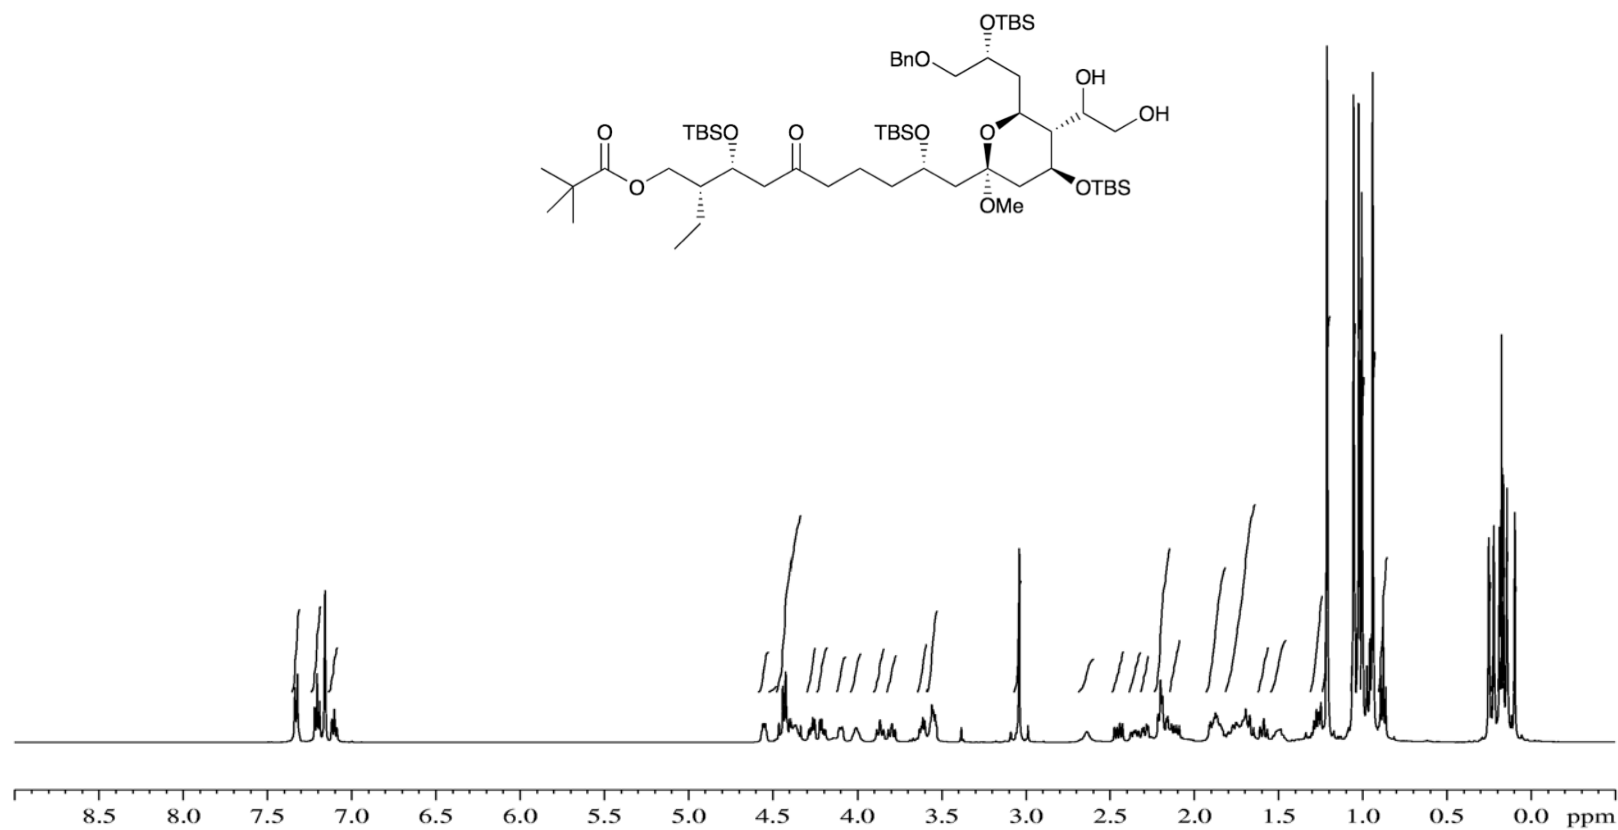

The <sup>1</sup>H NMR Spectrum of Compound (-)-S31 in C<sub>6</sub>D<sub>6</sub>

S266

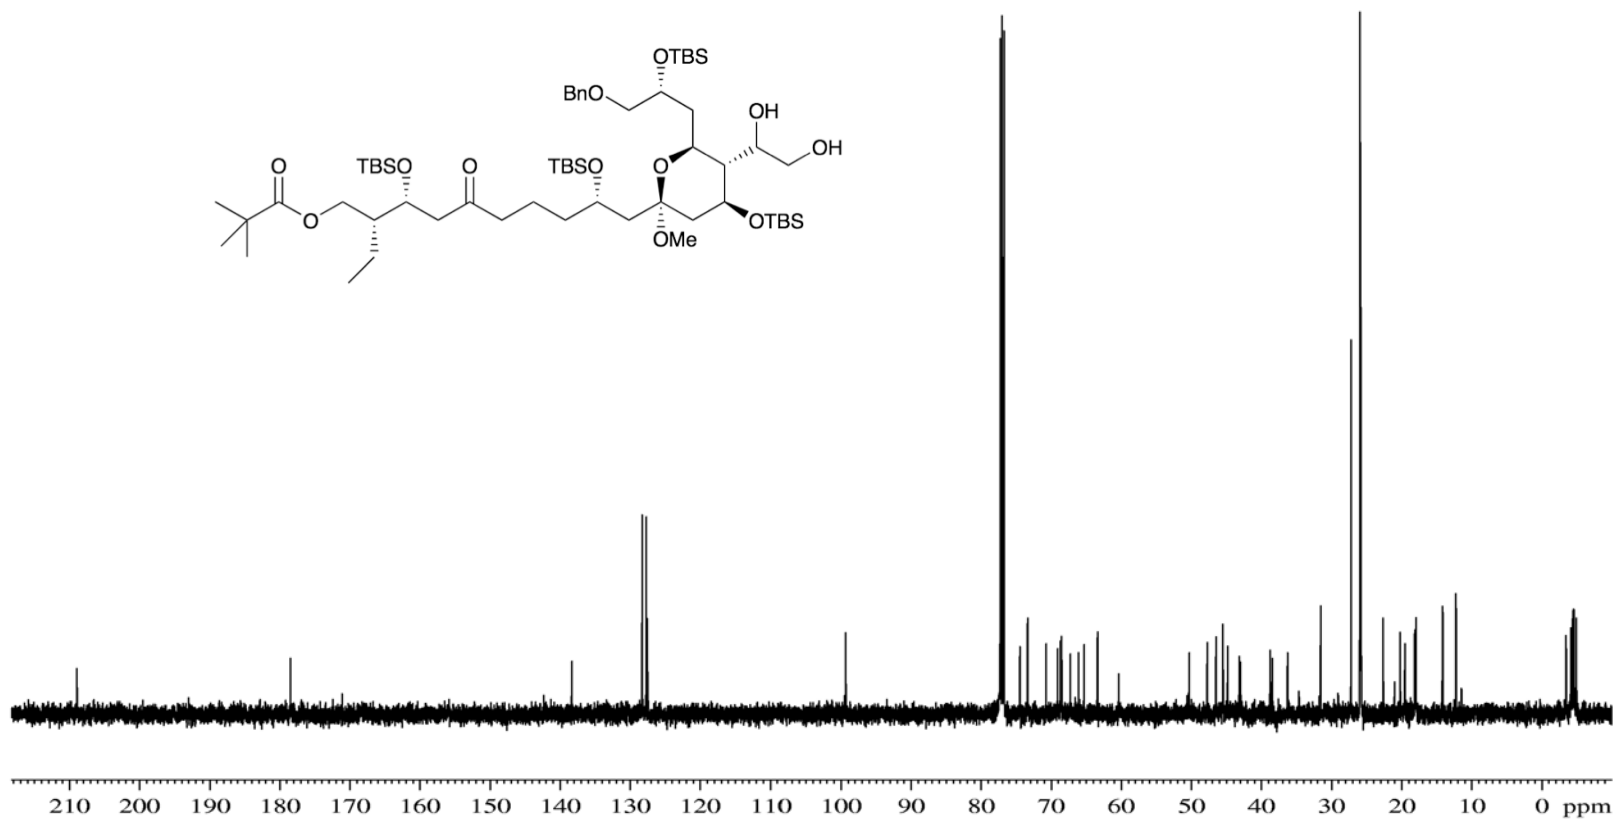

The <sup>13</sup>C NMR Spectrum of Compound (-)-S31 in CDCl<sub>3</sub>

S267

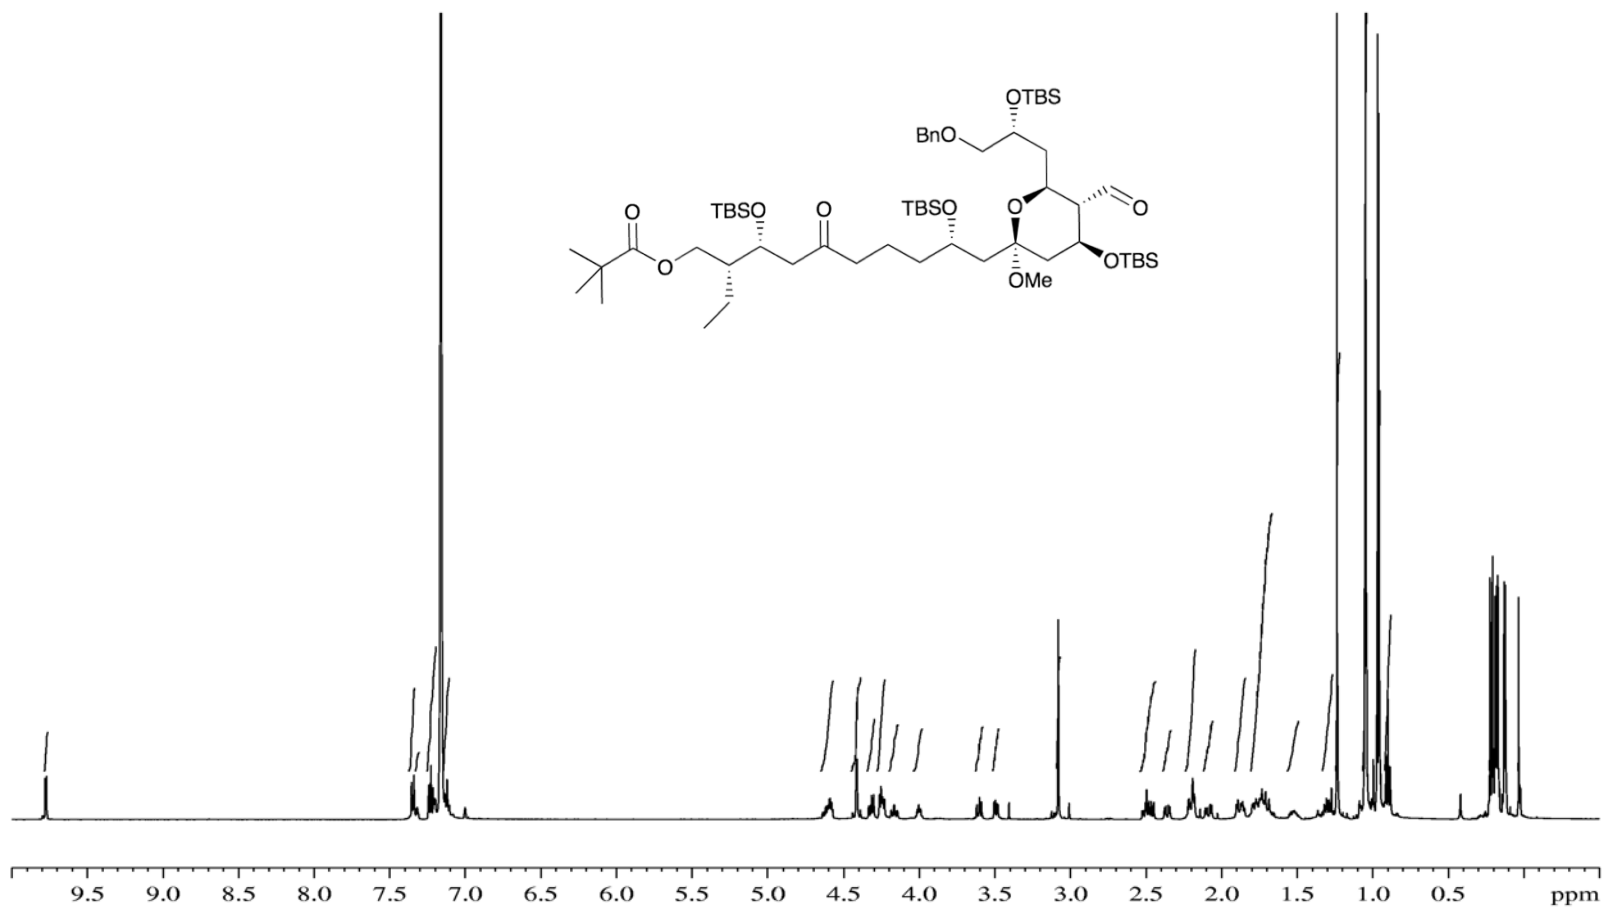

The <sup>1</sup>H NMR Spectrum of Compound (-)-71 in C<sub>6</sub>D<sub>6</sub>

S268

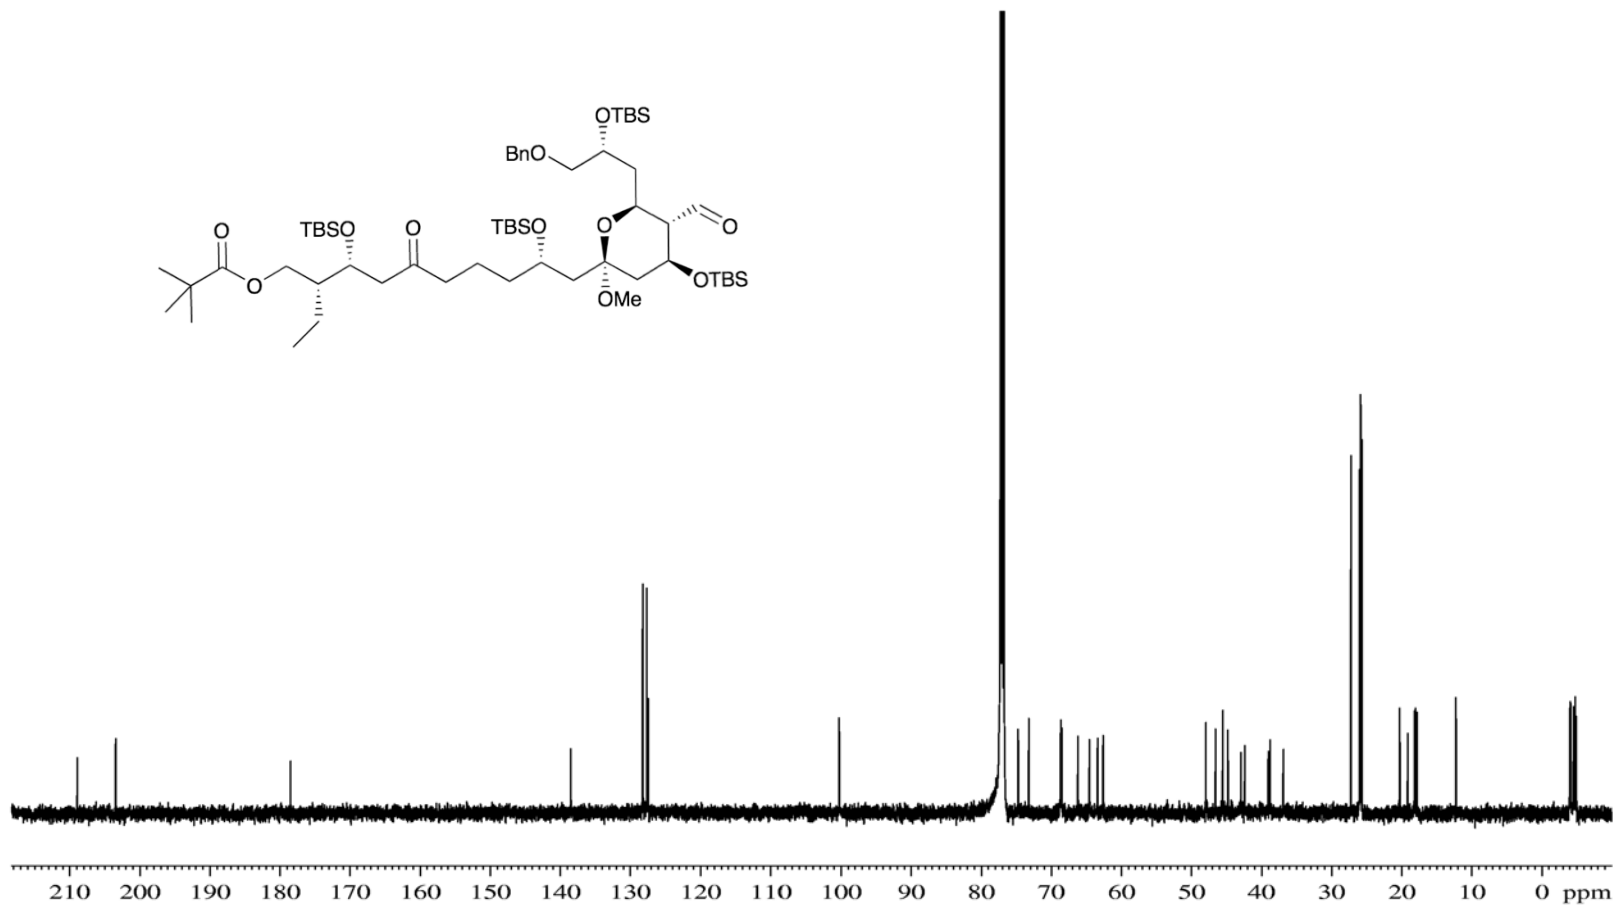

The  $^{13}\text{C}$  NMR Spectrum of Compound (-)-71 in  $\text{CDCl}_3$

S269

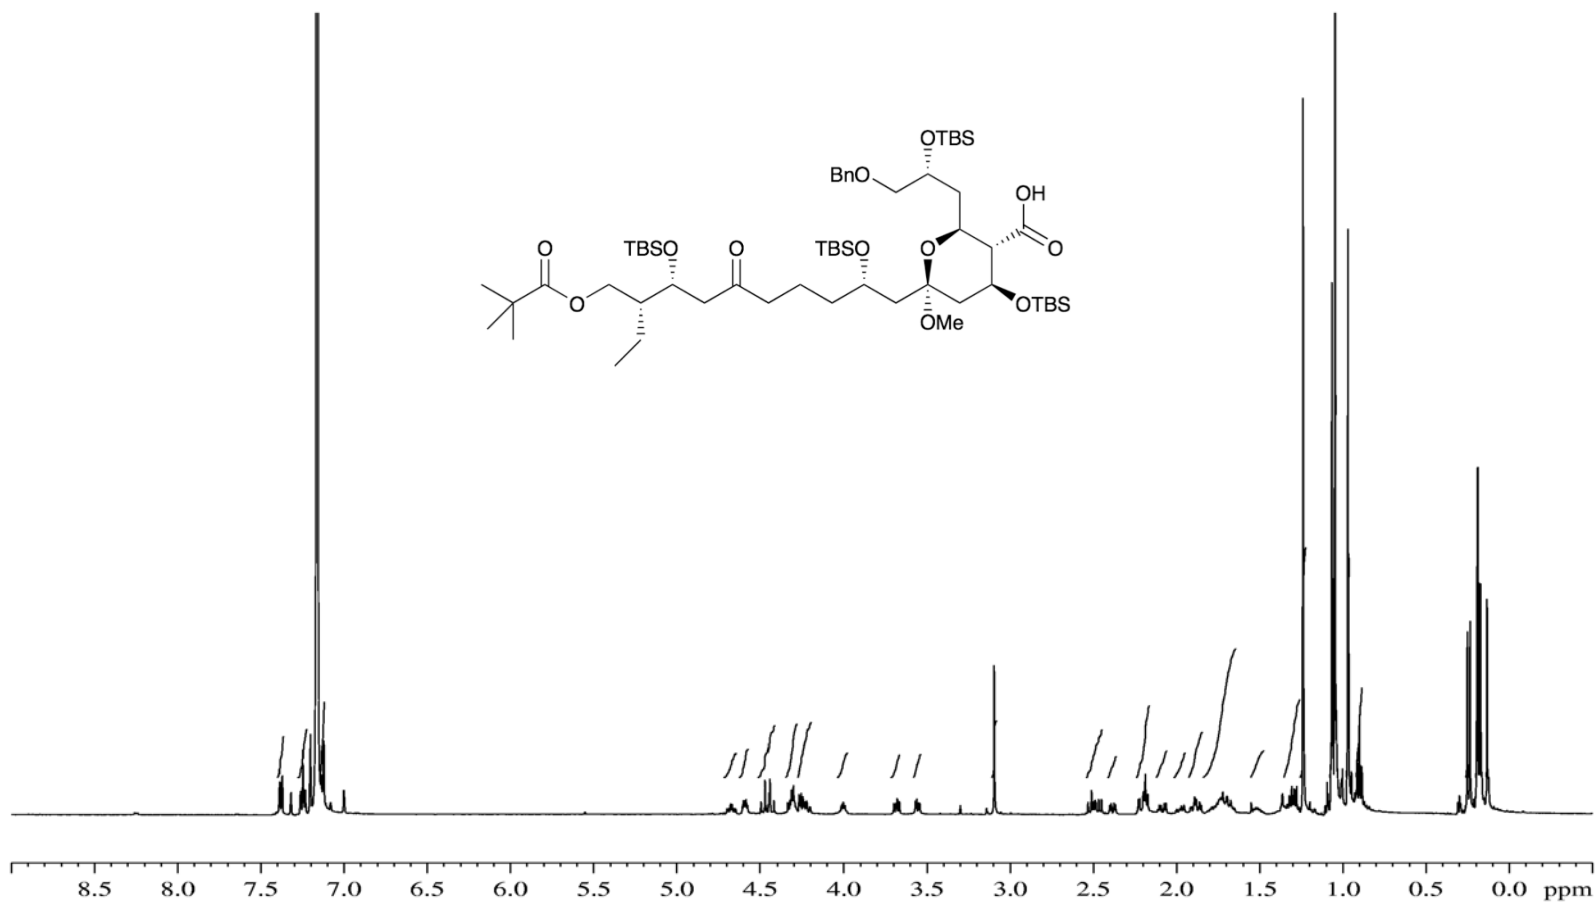

The  $^1\text{H}$  NMR Spectrum of Compound (-)-**S32** in  $\text{C}_6\text{D}_6$

S270

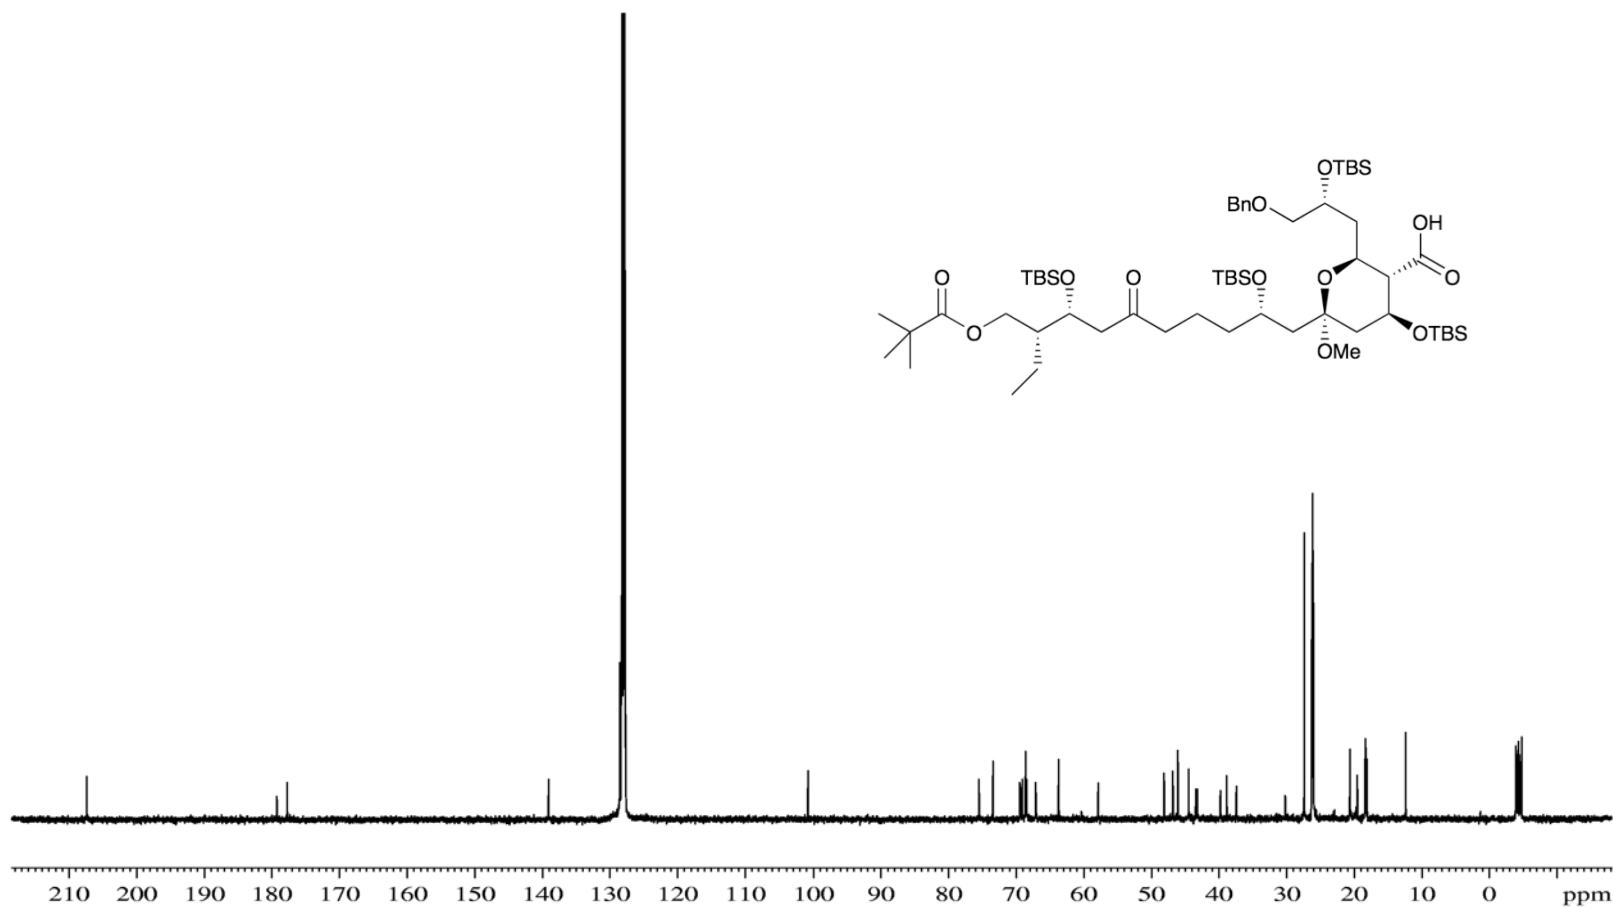

The  $^{13}\text{C}$  NMR Spectrum of Compound (-)-S32 in  $\text{C}_6\text{D}_6$



S271

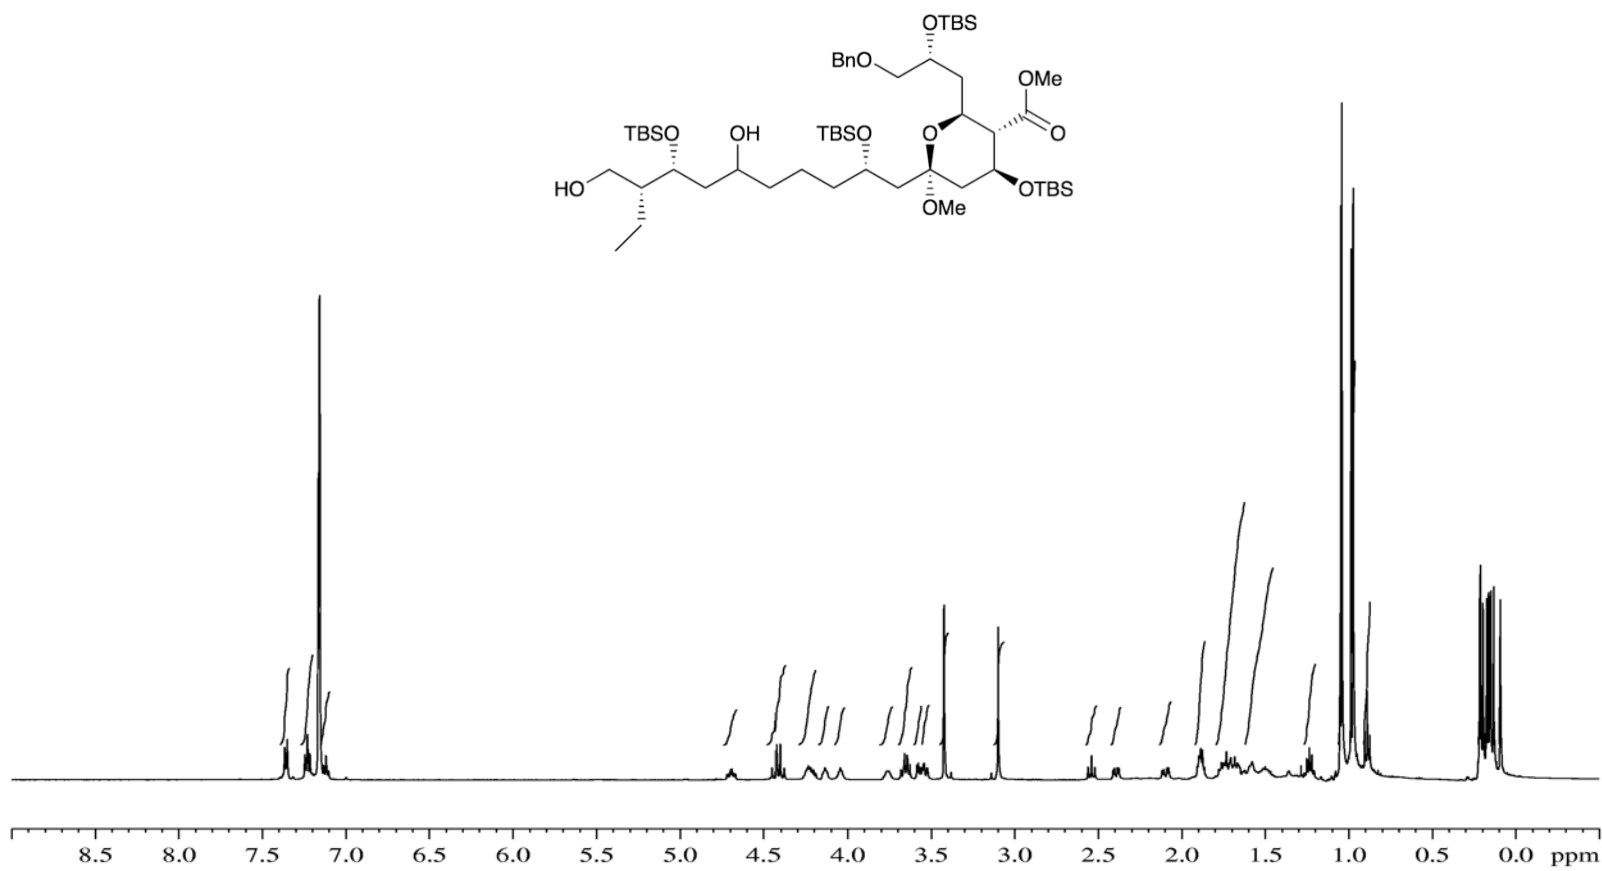

The <sup>1</sup>H NMR Spectrum of Compound (-)-72 in C<sub>6</sub>D<sub>6</sub>

S272

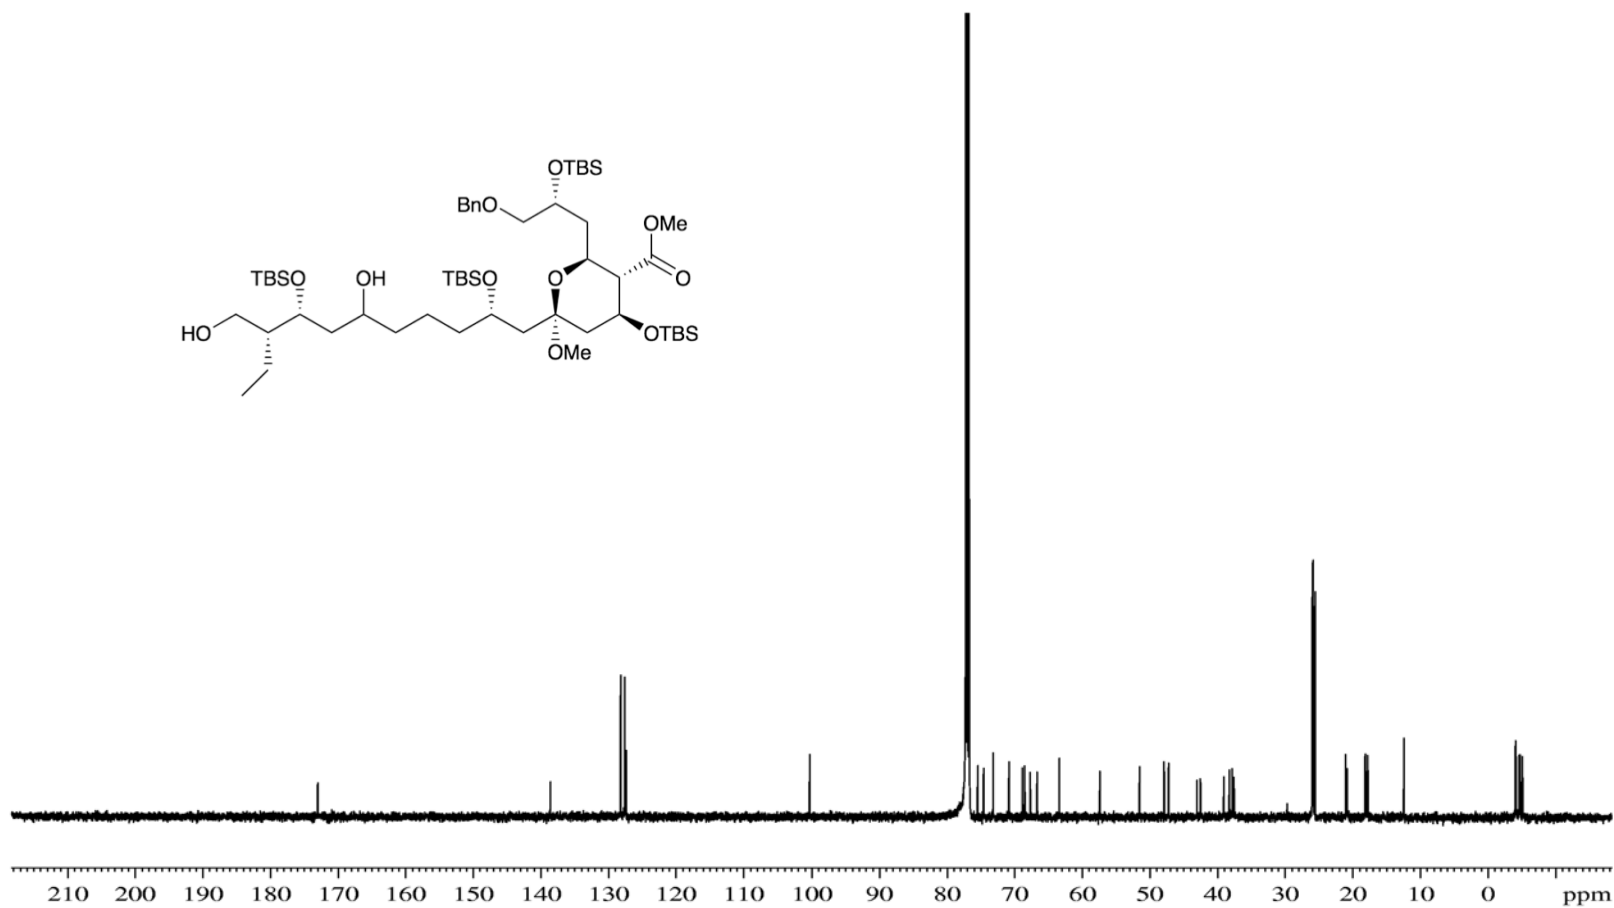

The <sup>13</sup>C NMR Spectrum of Compound (-)-72 in CDCl<sub>3</sub>

S273

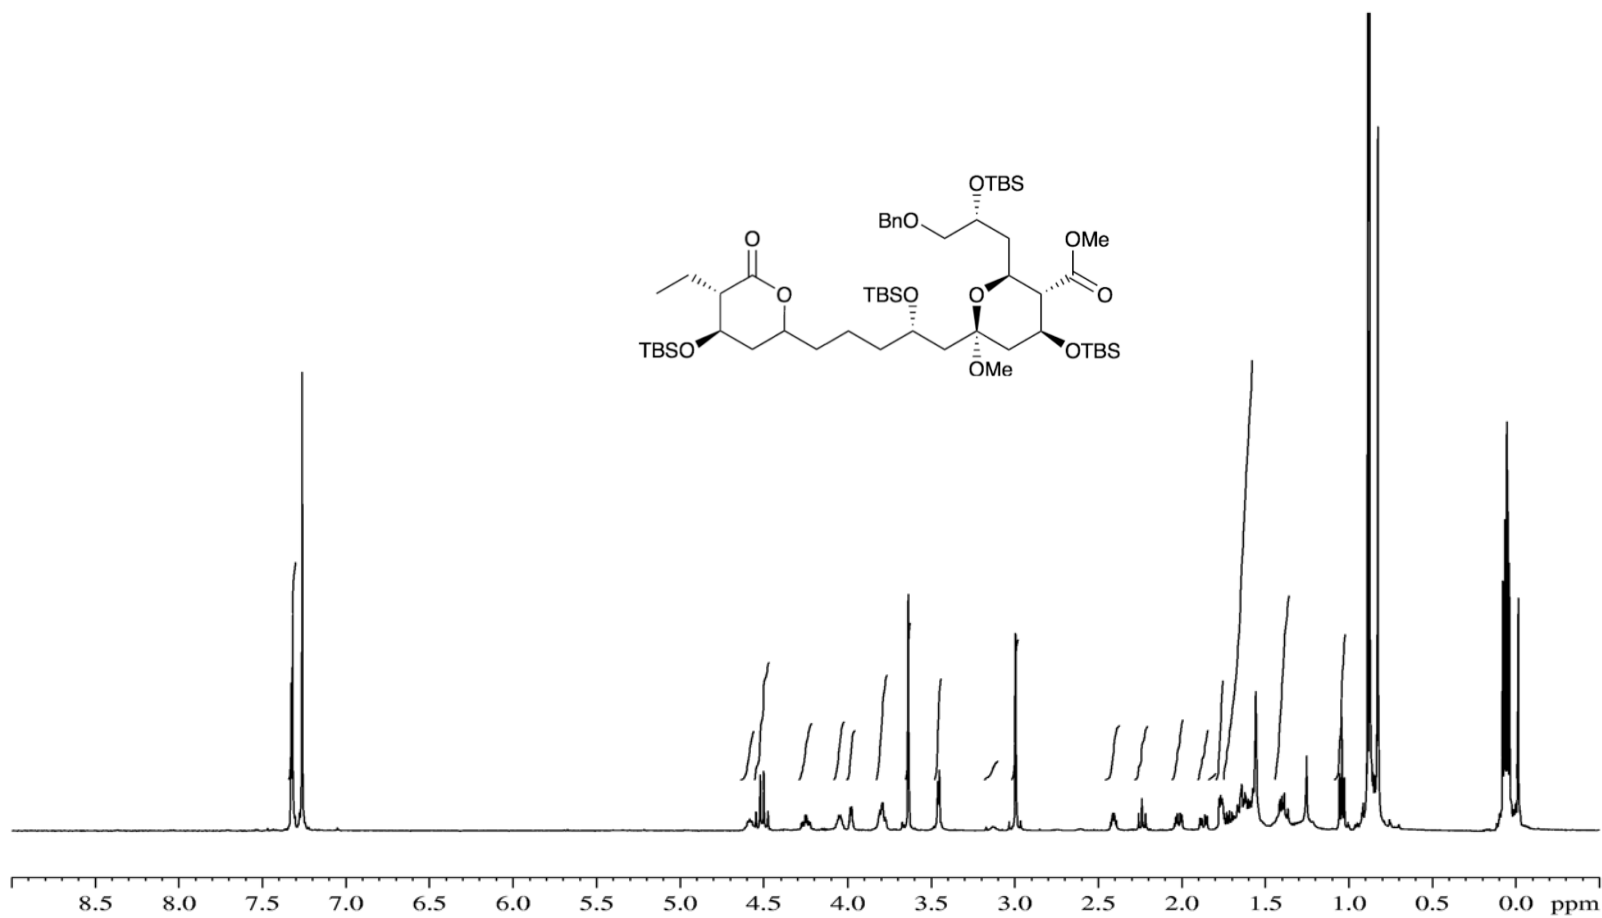

The <sup>1</sup>H NMR Spectrum of Compound (-)-74 in CDCl<sub>3</sub>

S274

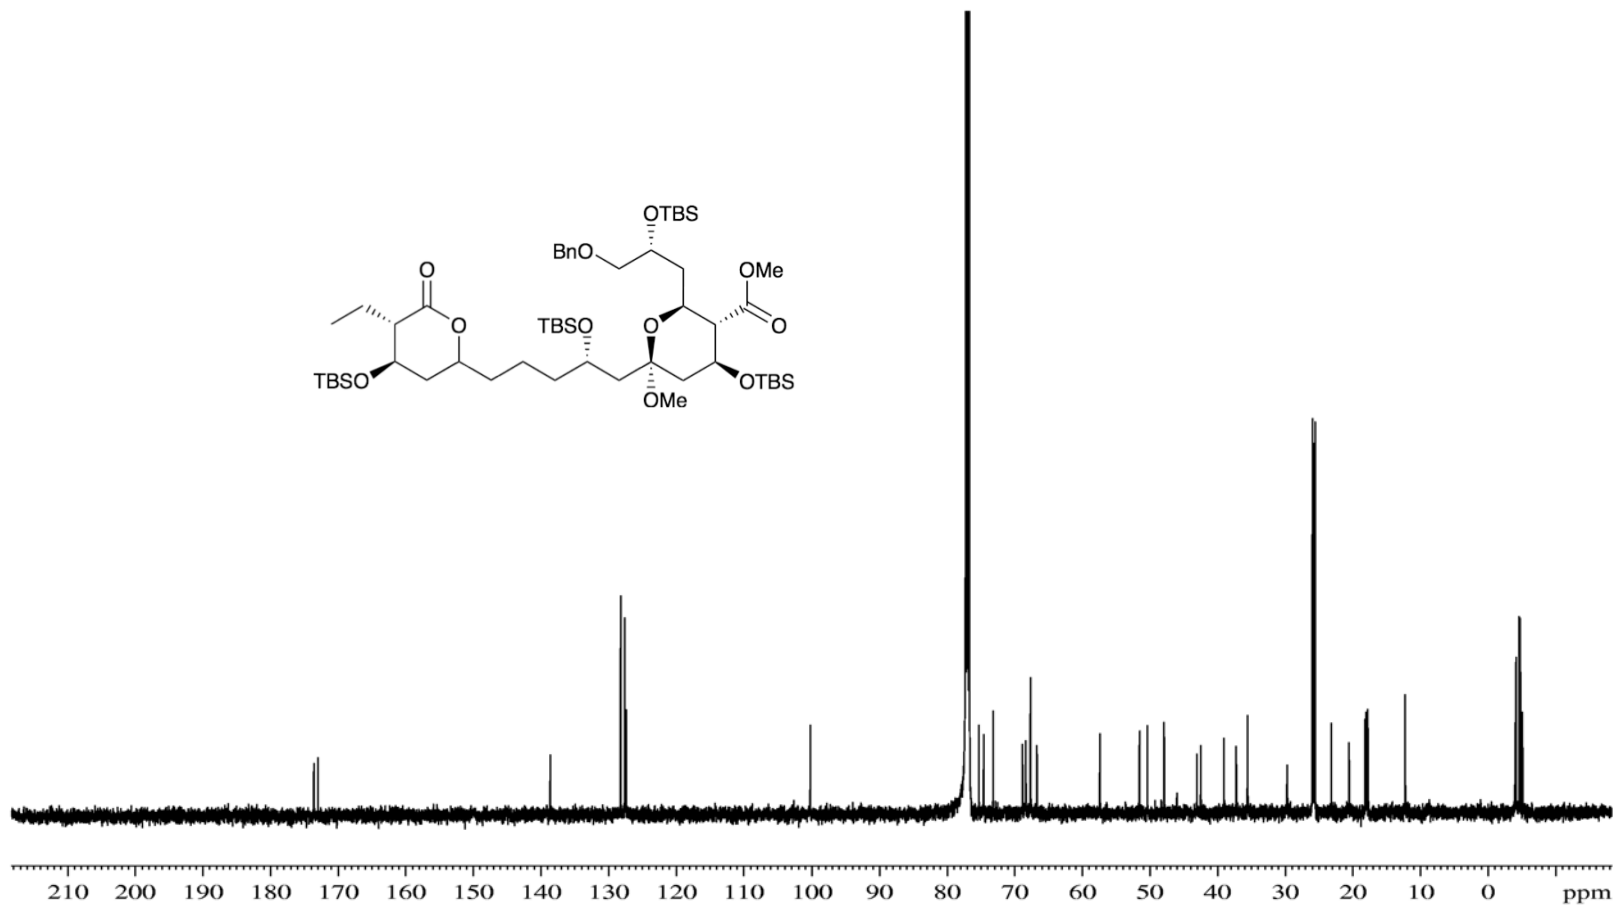

The <sup>13</sup>C NMR Spectrum of Compound (-)-74 in CDCl<sub>3</sub>

S275

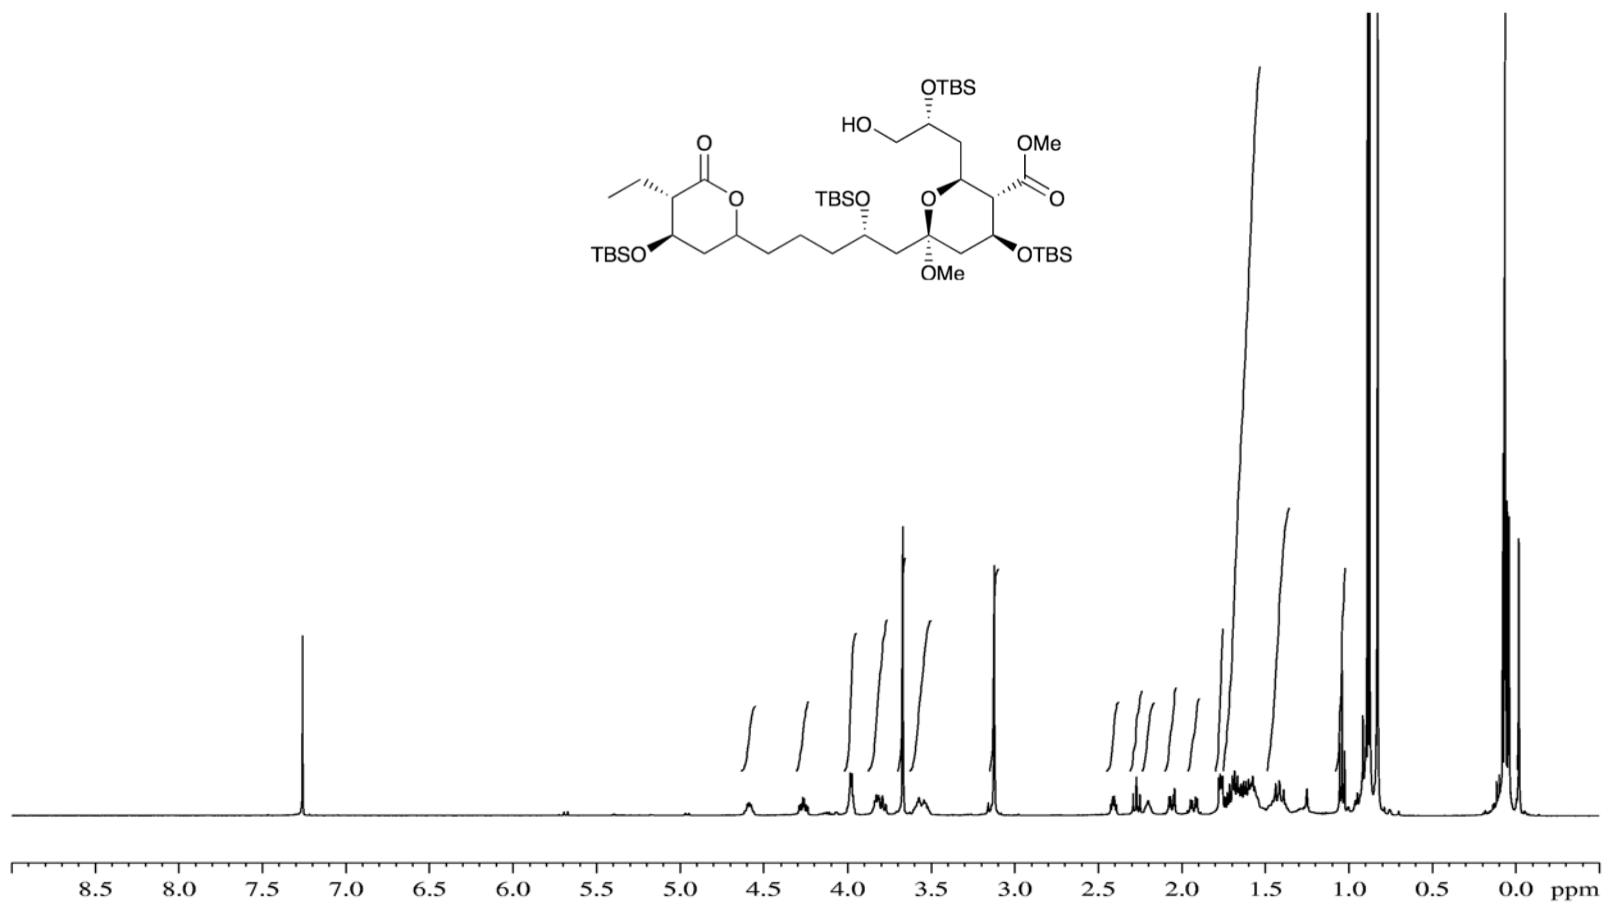

The  $^1\text{H}$  NMR Spectrum of Compound **(-)-S33** in  $\text{CDCl}_3$

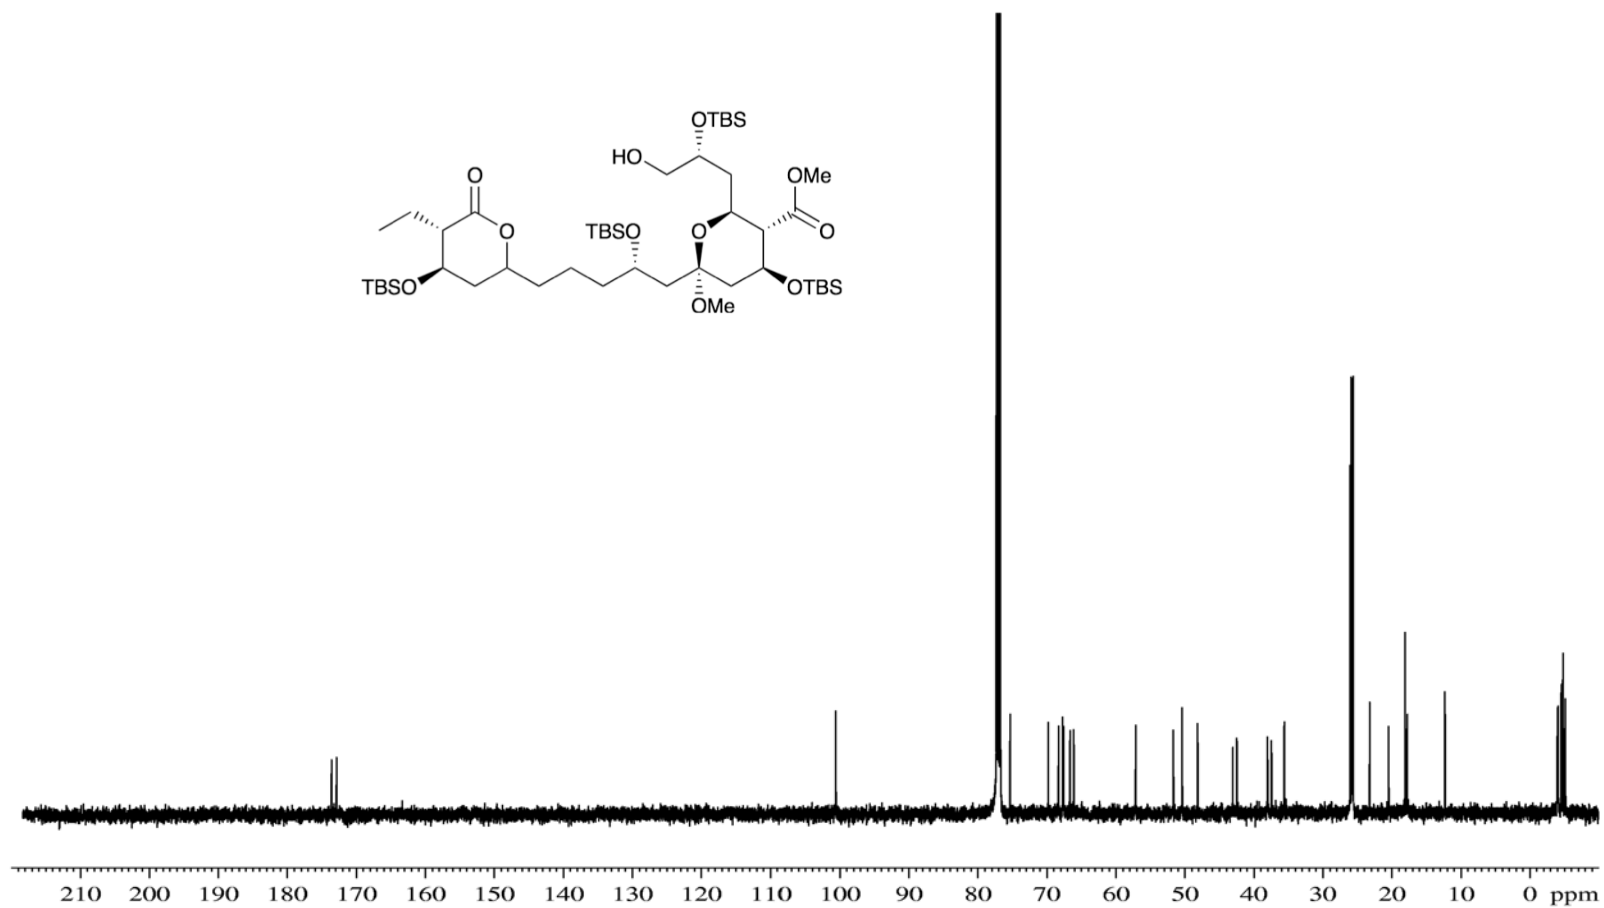

The  $^{13}\text{C}$  NMR Spectrum of Compound (-)-S33 in  $\text{CDCl}_3$

S277

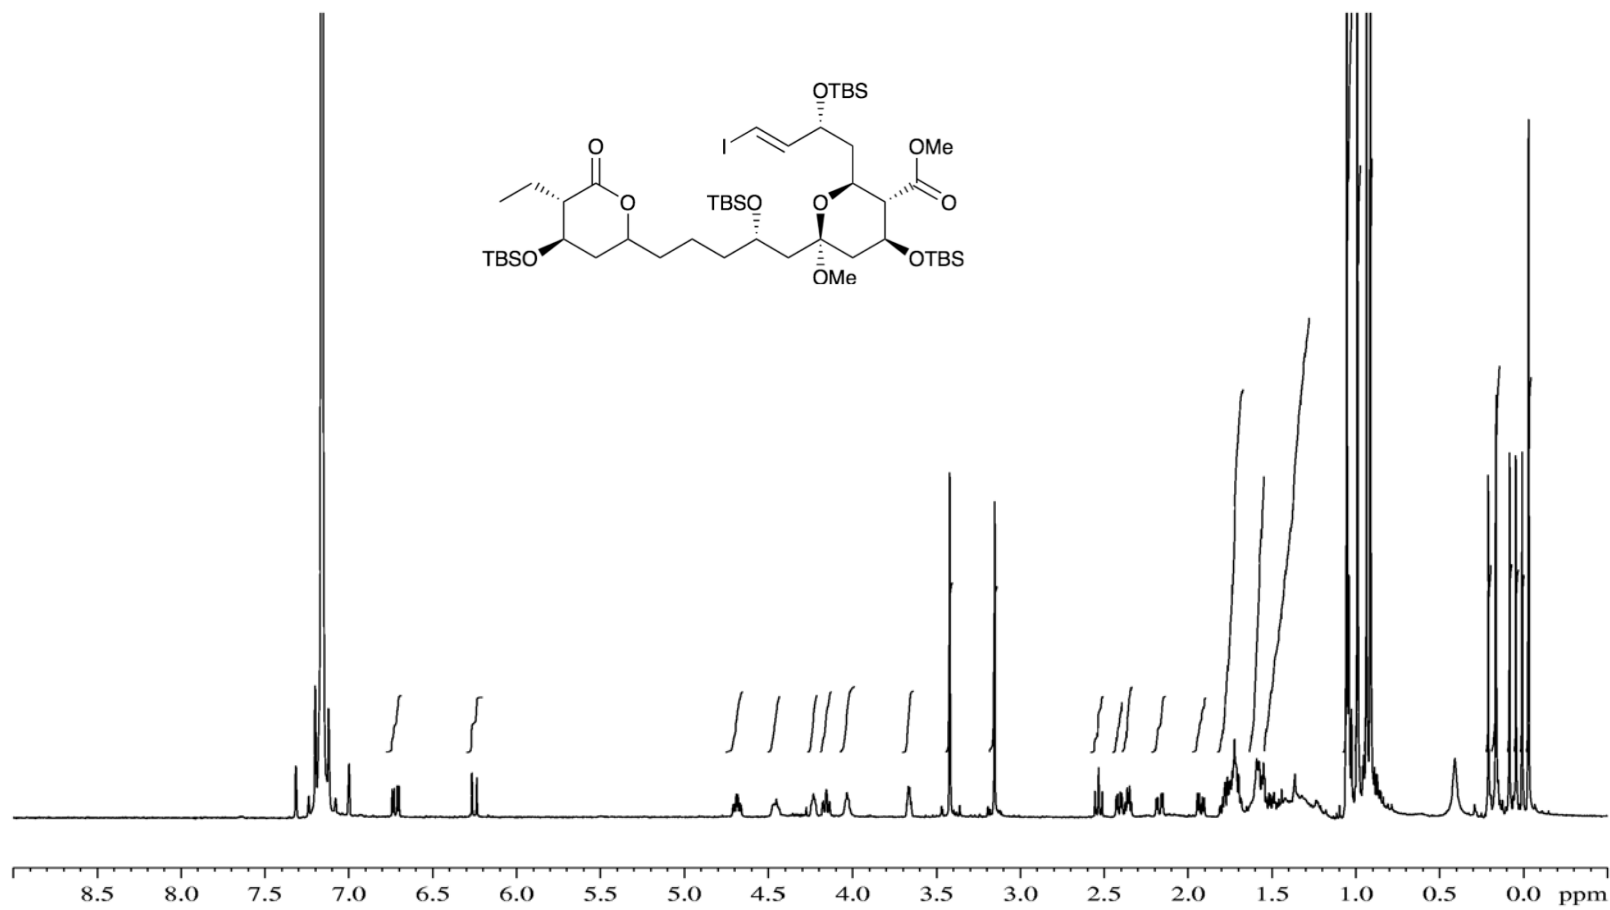

The  $^1\text{H}$  NMR Spectrum of Compound (-)-75 in  $\text{C}_6\text{D}_6$

S278

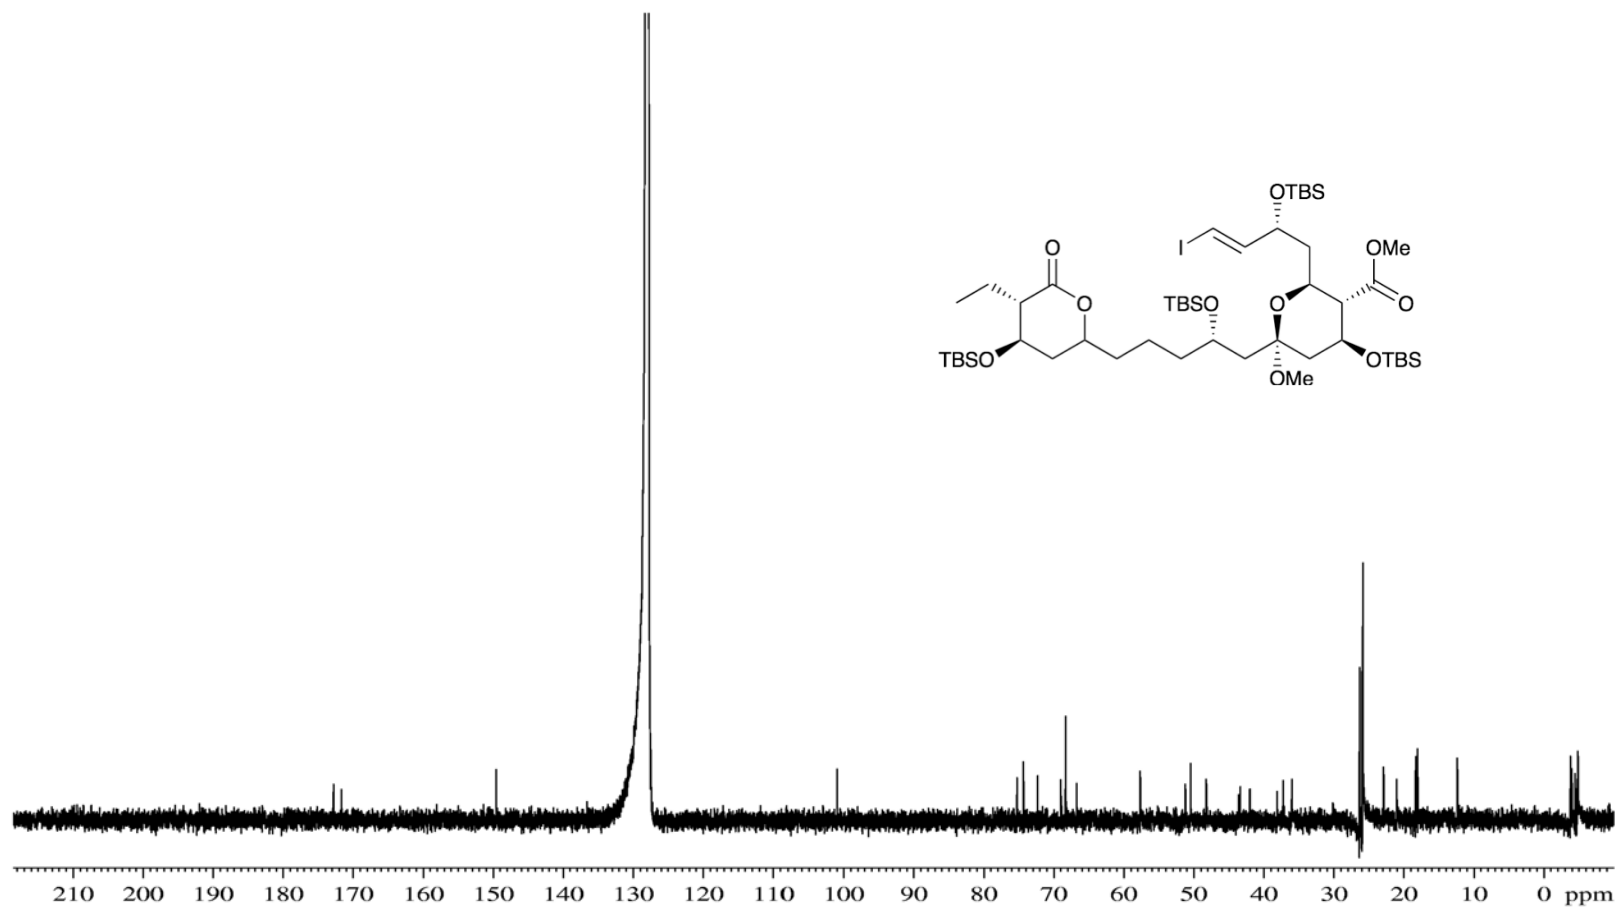

The  $^{13}\text{C}$  NMR Spectrum of Compound (-)-75 in  $\text{C}_6\text{D}_6$



S279

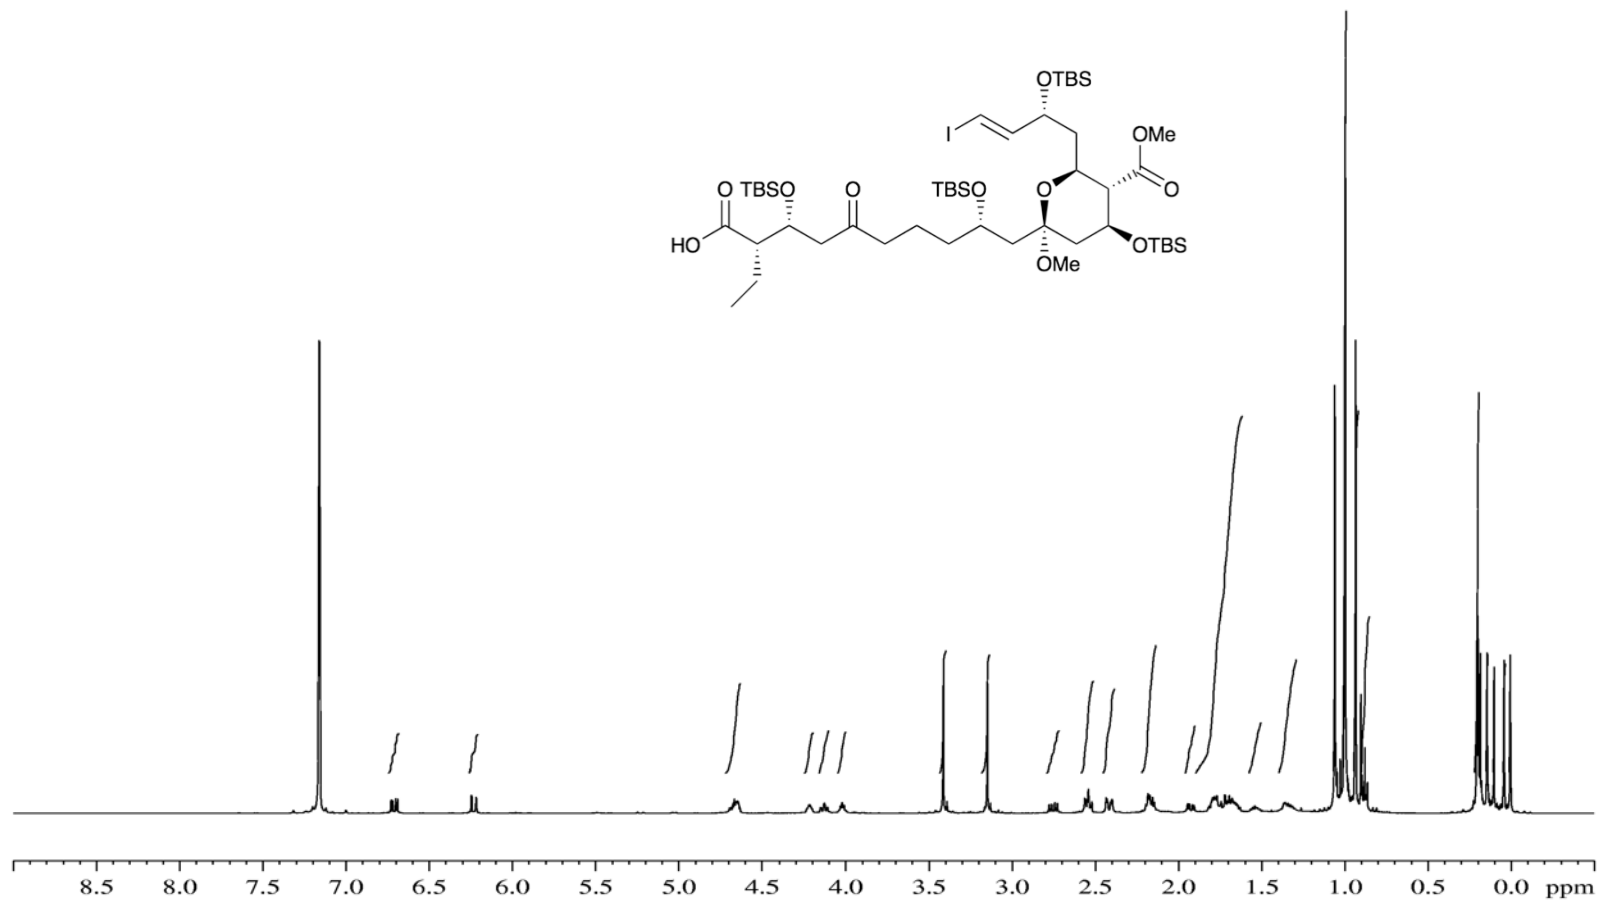

The  $^1\text{H}$  NMR Spectrum of Compound (-)-4 in  $\text{C}_6\text{D}_6$

S280

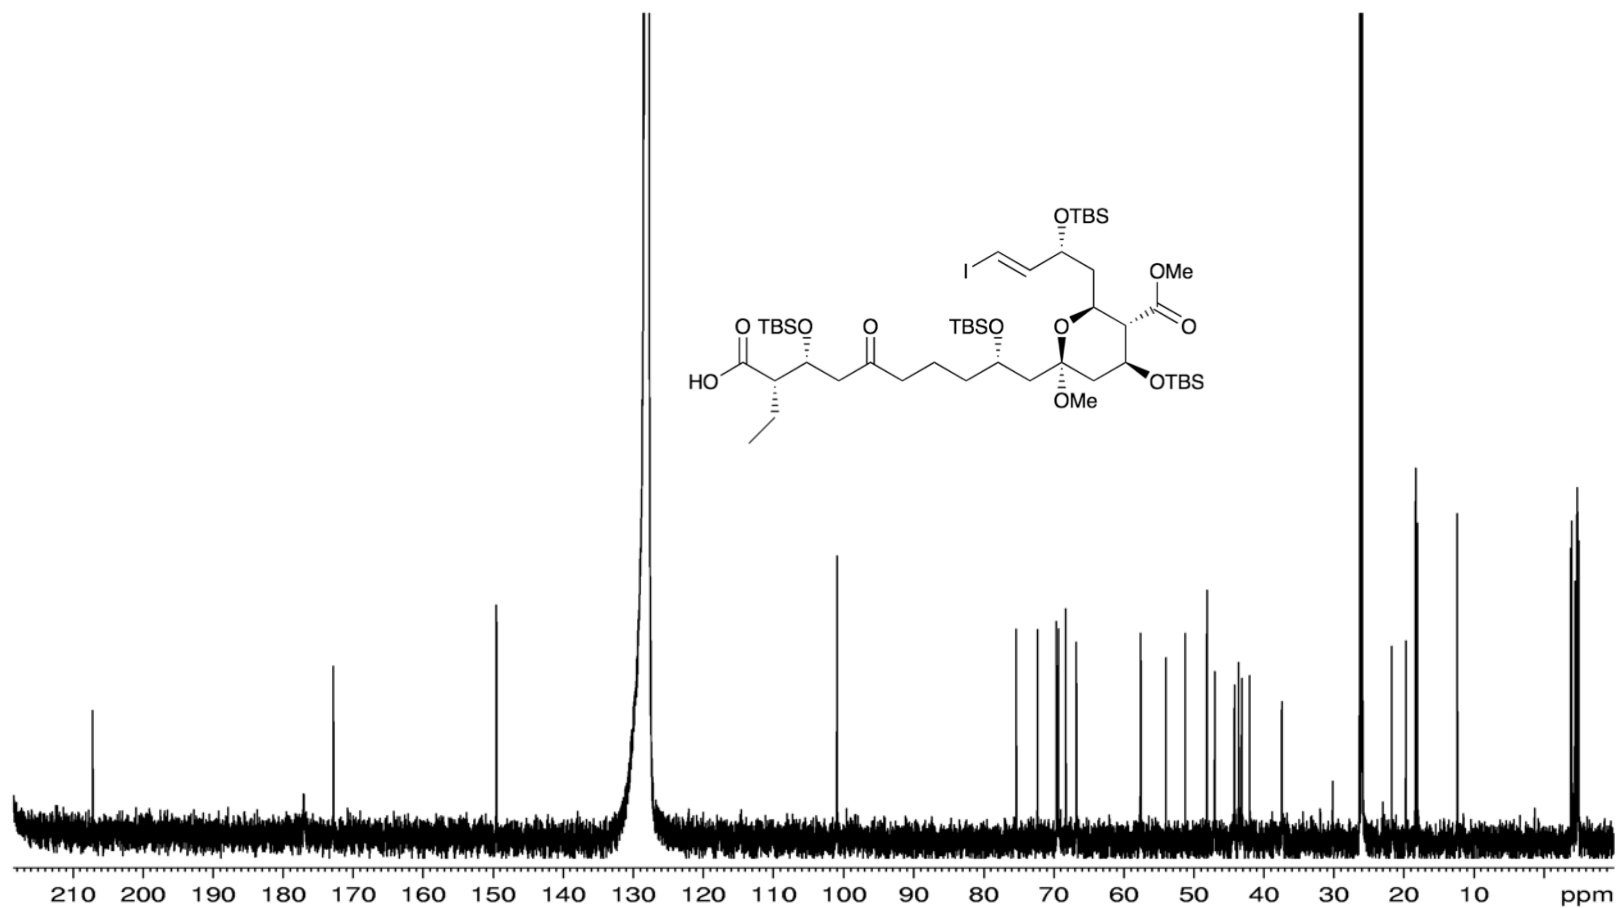

The  $^{13}\text{C}$  NMR Spectrum of Compound (-)-4 in  $\text{C}_6\text{D}_6$

S281

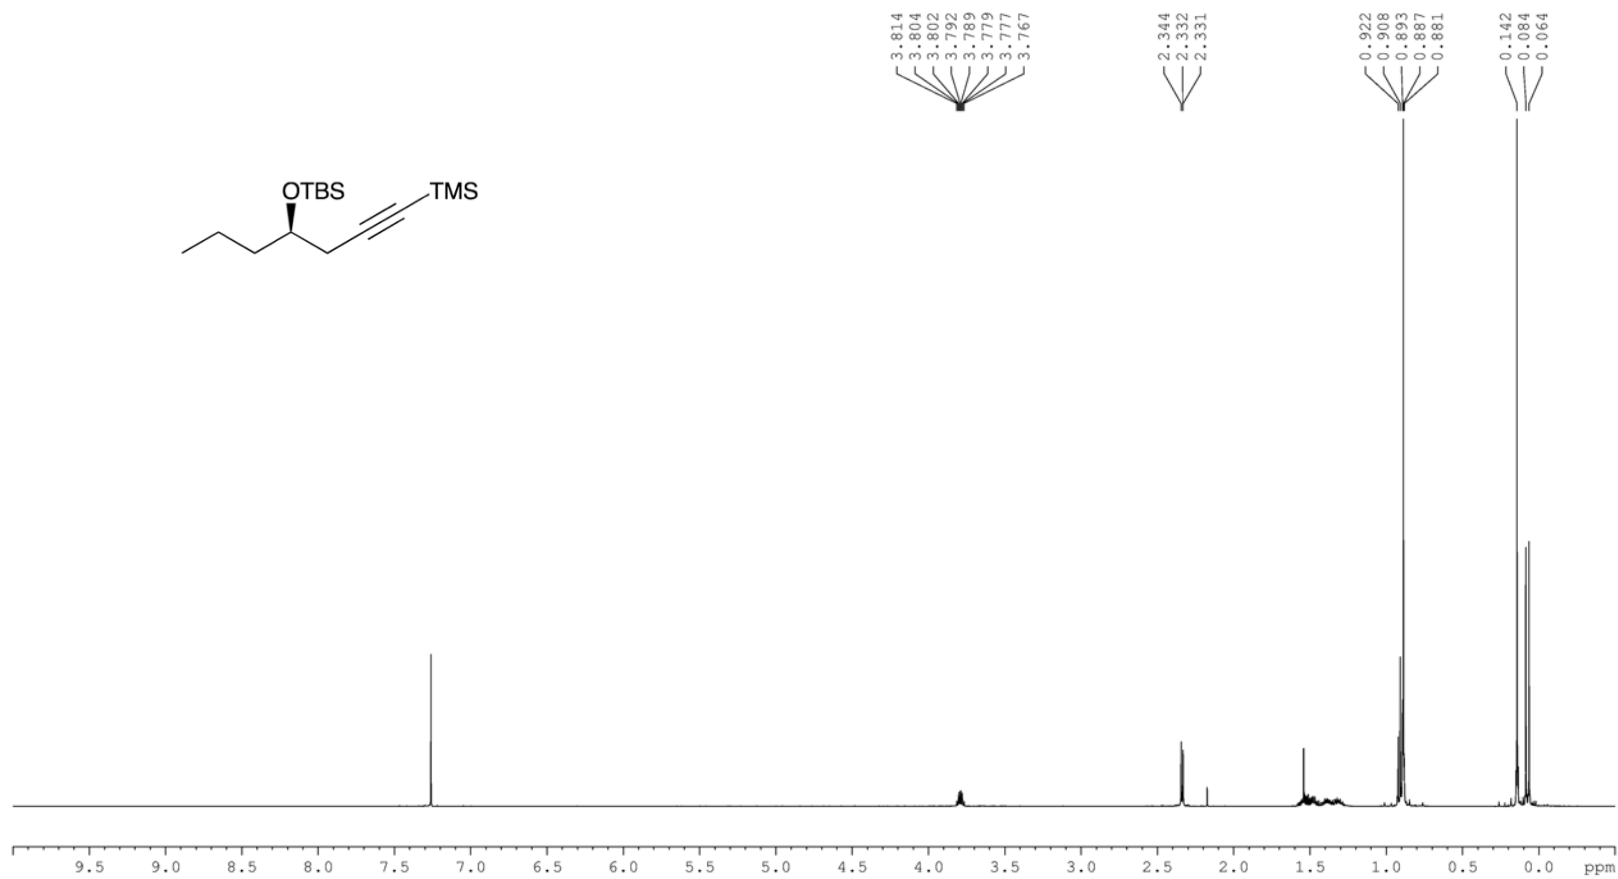

The <sup>1</sup>H NMR Spectrum of Compound (+)-S34 in CDCl<sub>3</sub>

S282

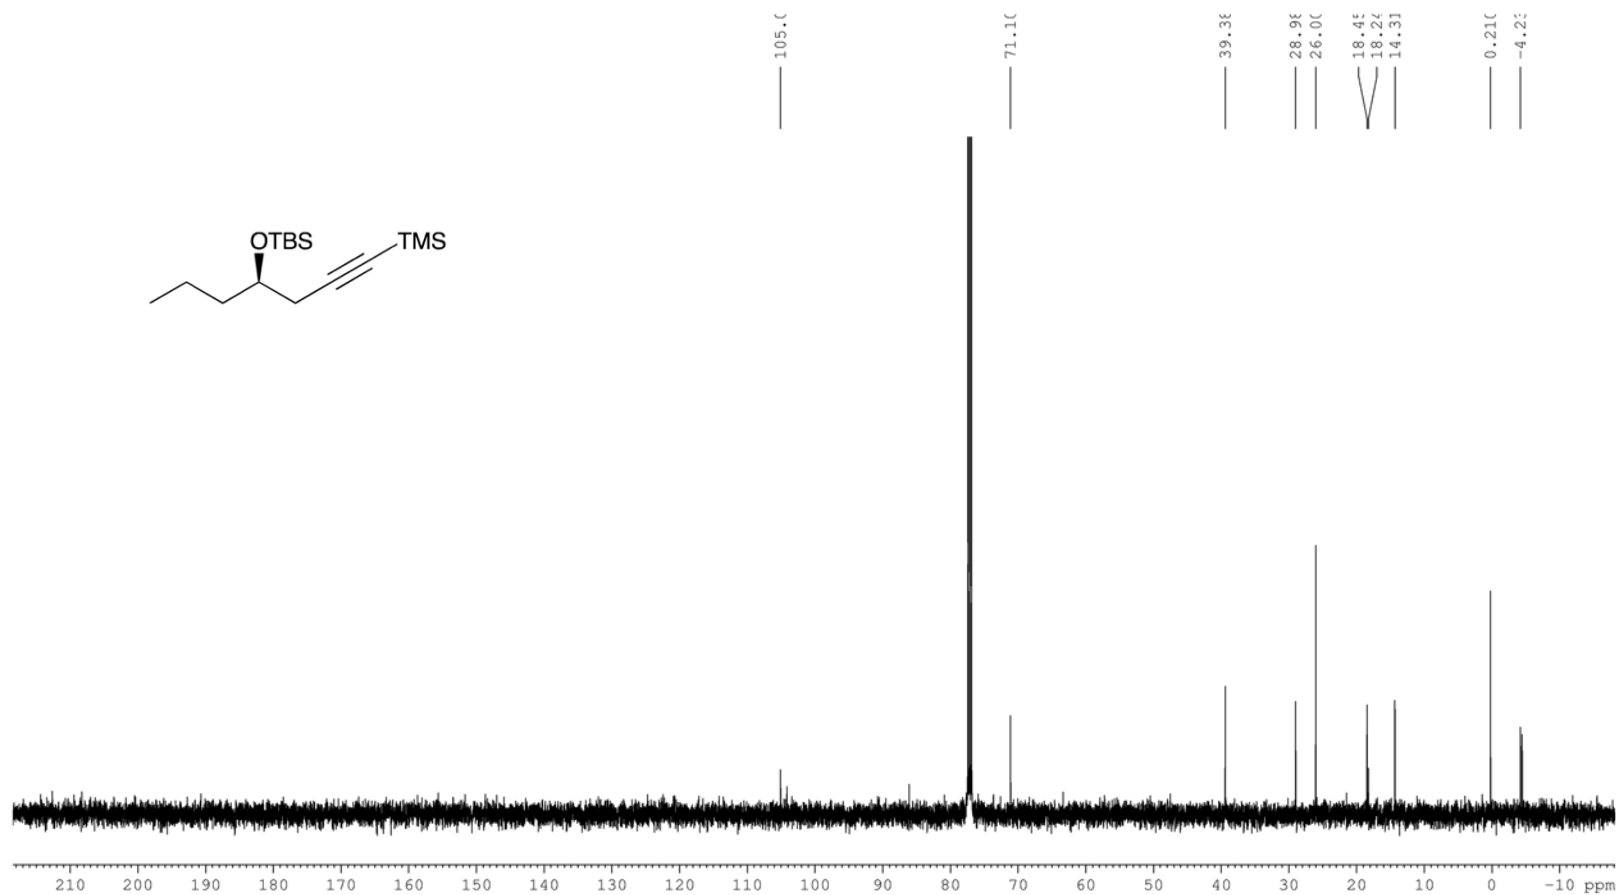

The <sup>13</sup>C NMR Spectrum of Compound (+)-S34 in CDCl<sub>3</sub>

S283

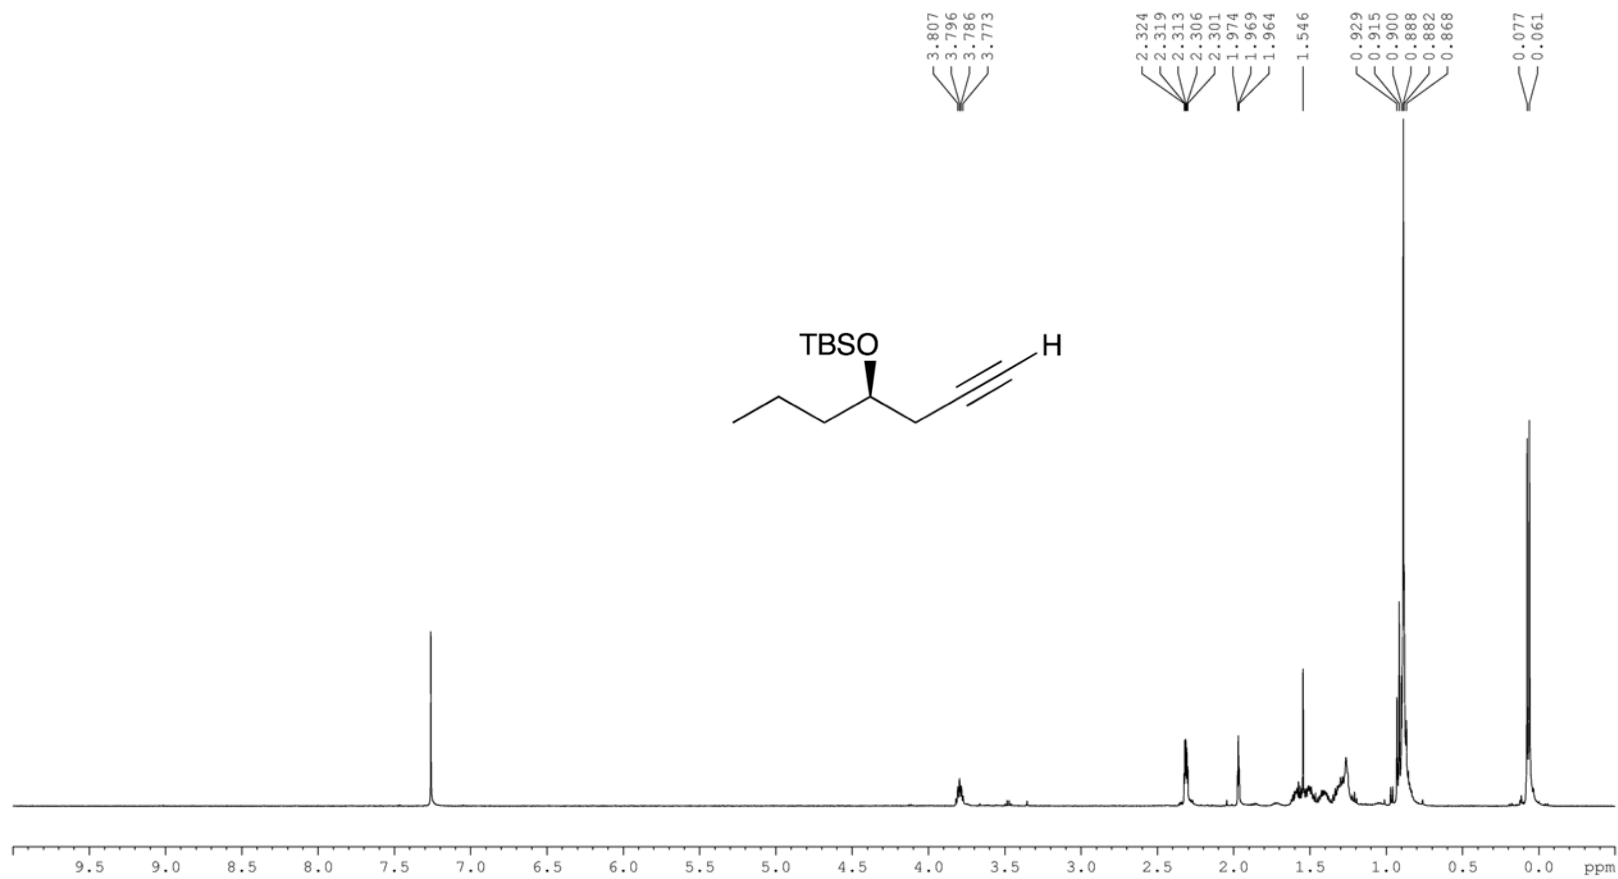

The <sup>1</sup>H NMR Spectrum of Compound (-)-78 in CDCl<sub>3</sub>

S284

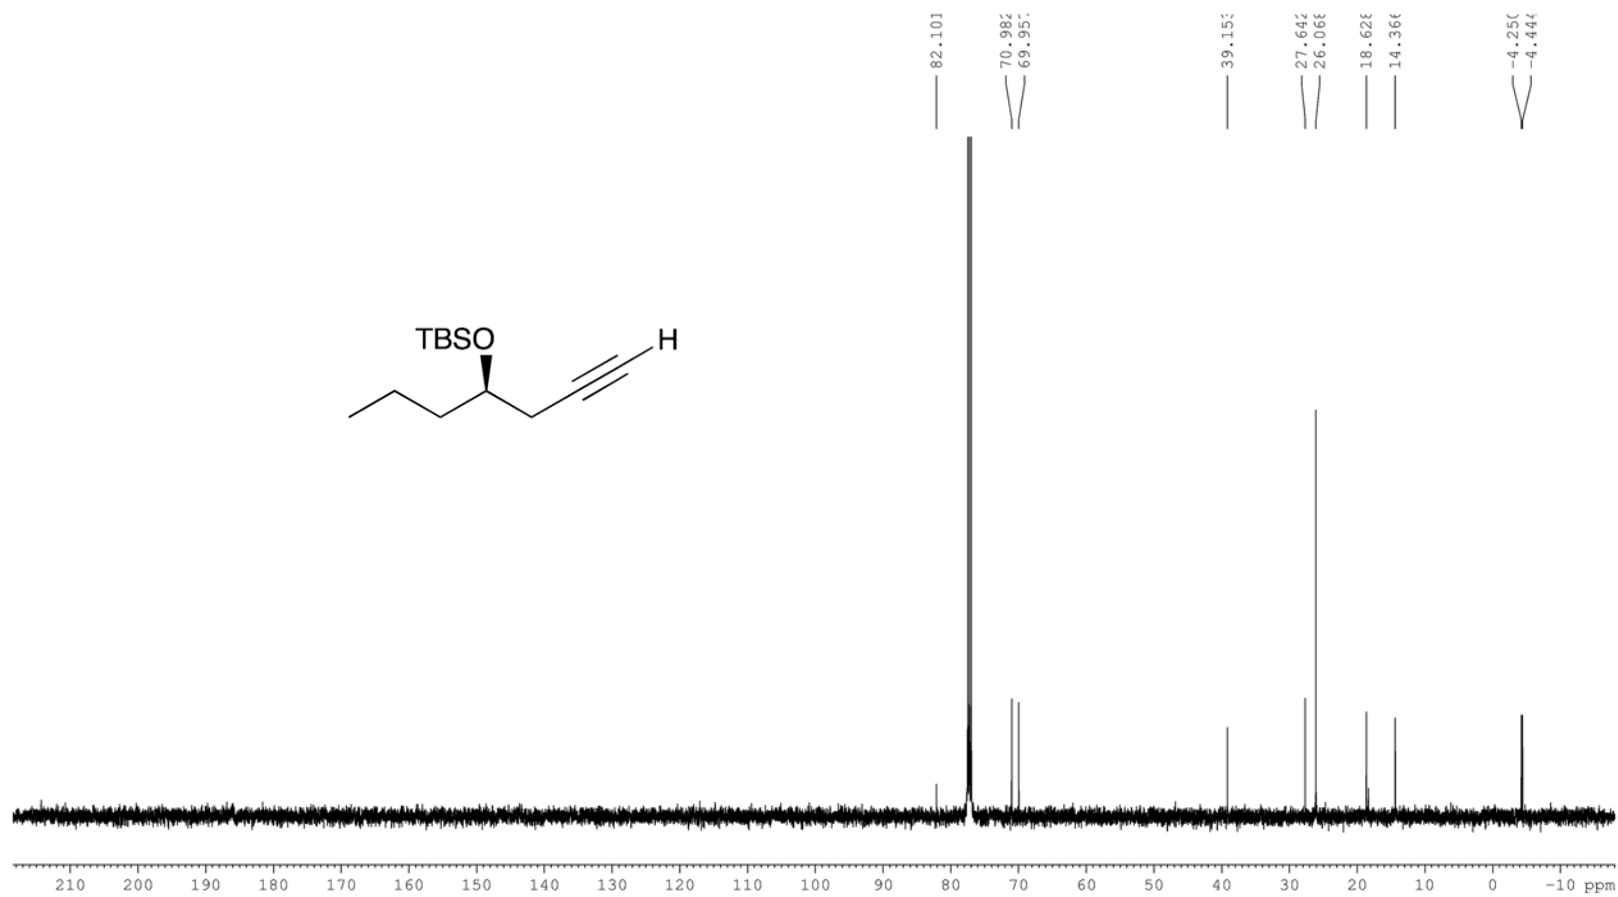

The  $^{13}\text{C}$  NMR Spectrum of Compound (-)-78 in  $\text{CDCl}_3$

S285

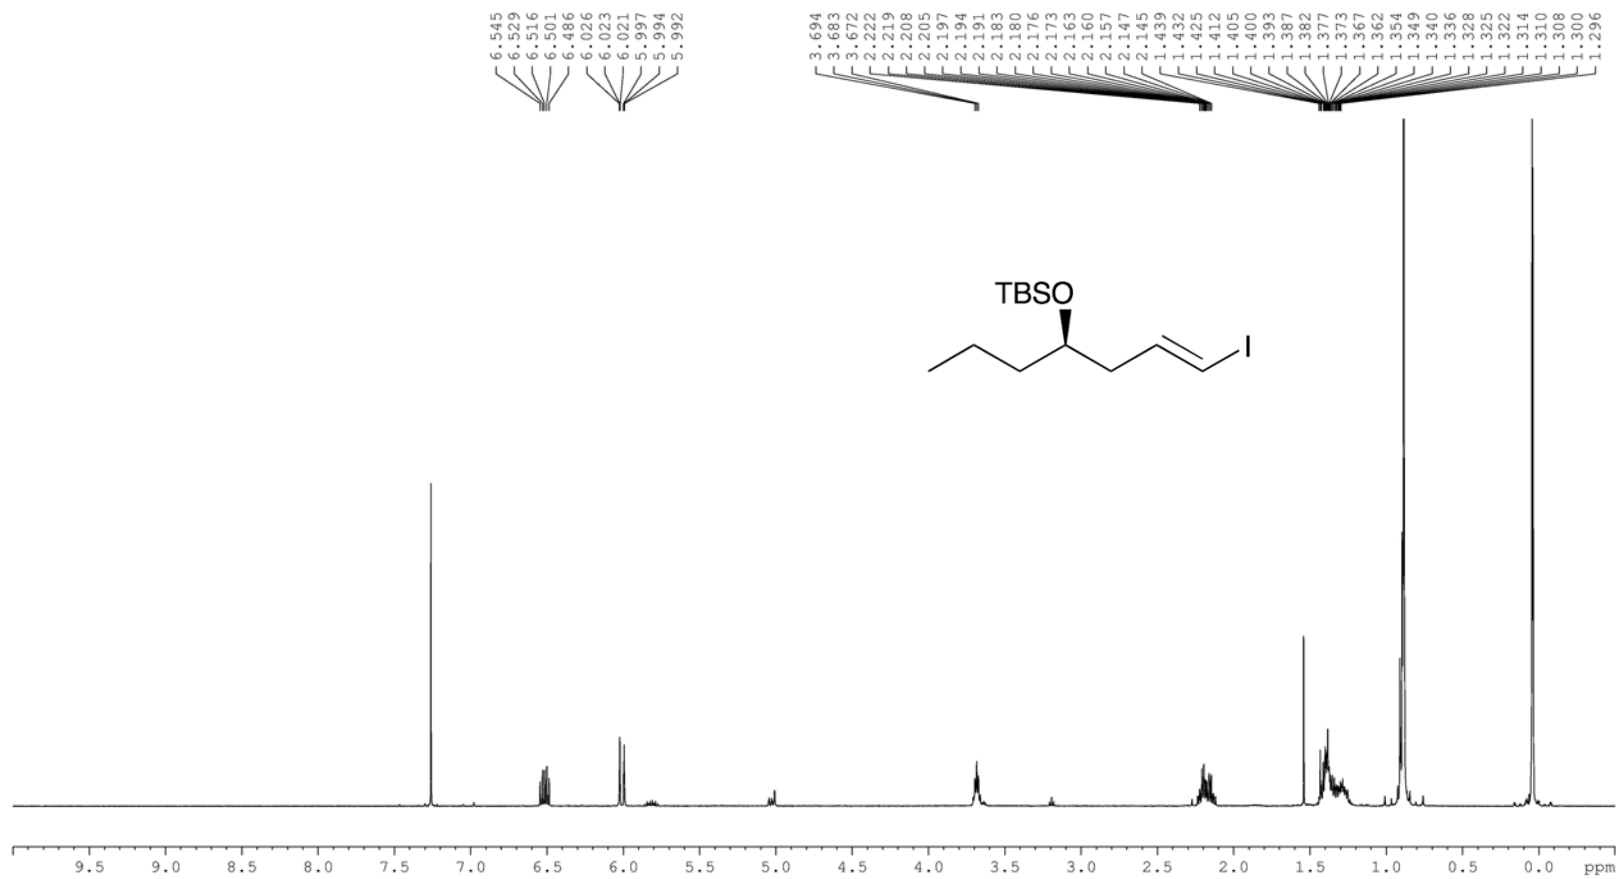

The  $^1\text{H}$  NMR Spectrum of Compound (-)-S35 in  $\text{CDCl}_3$

S286

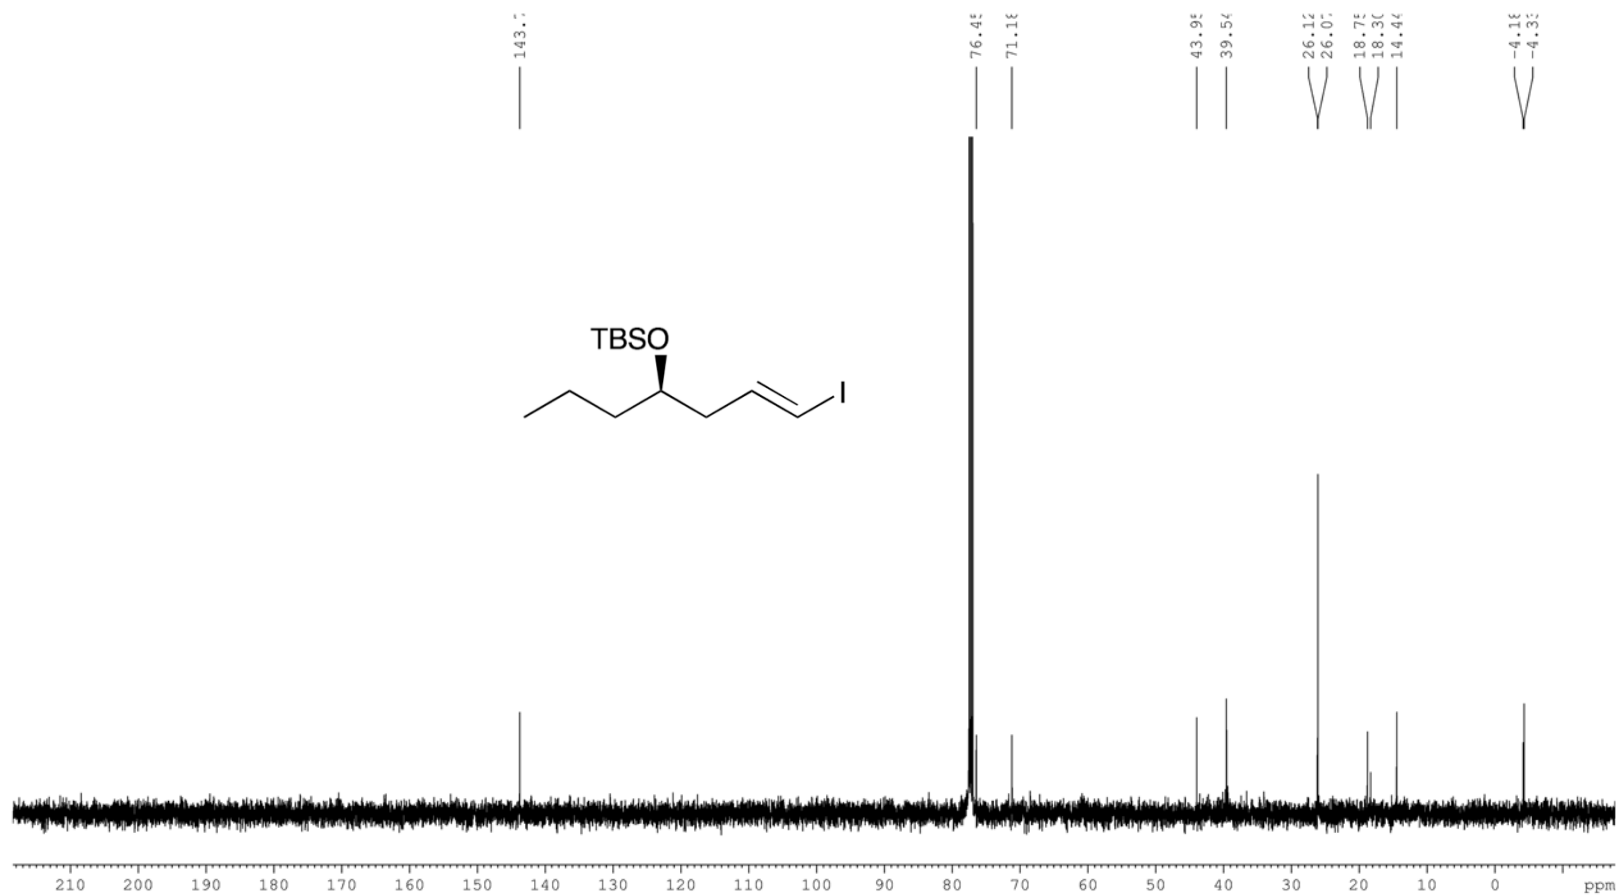

The <sup>13</sup>C NMR Spectrum of Compound (-)-S35 in CDCl<sub>3</sub>



S287

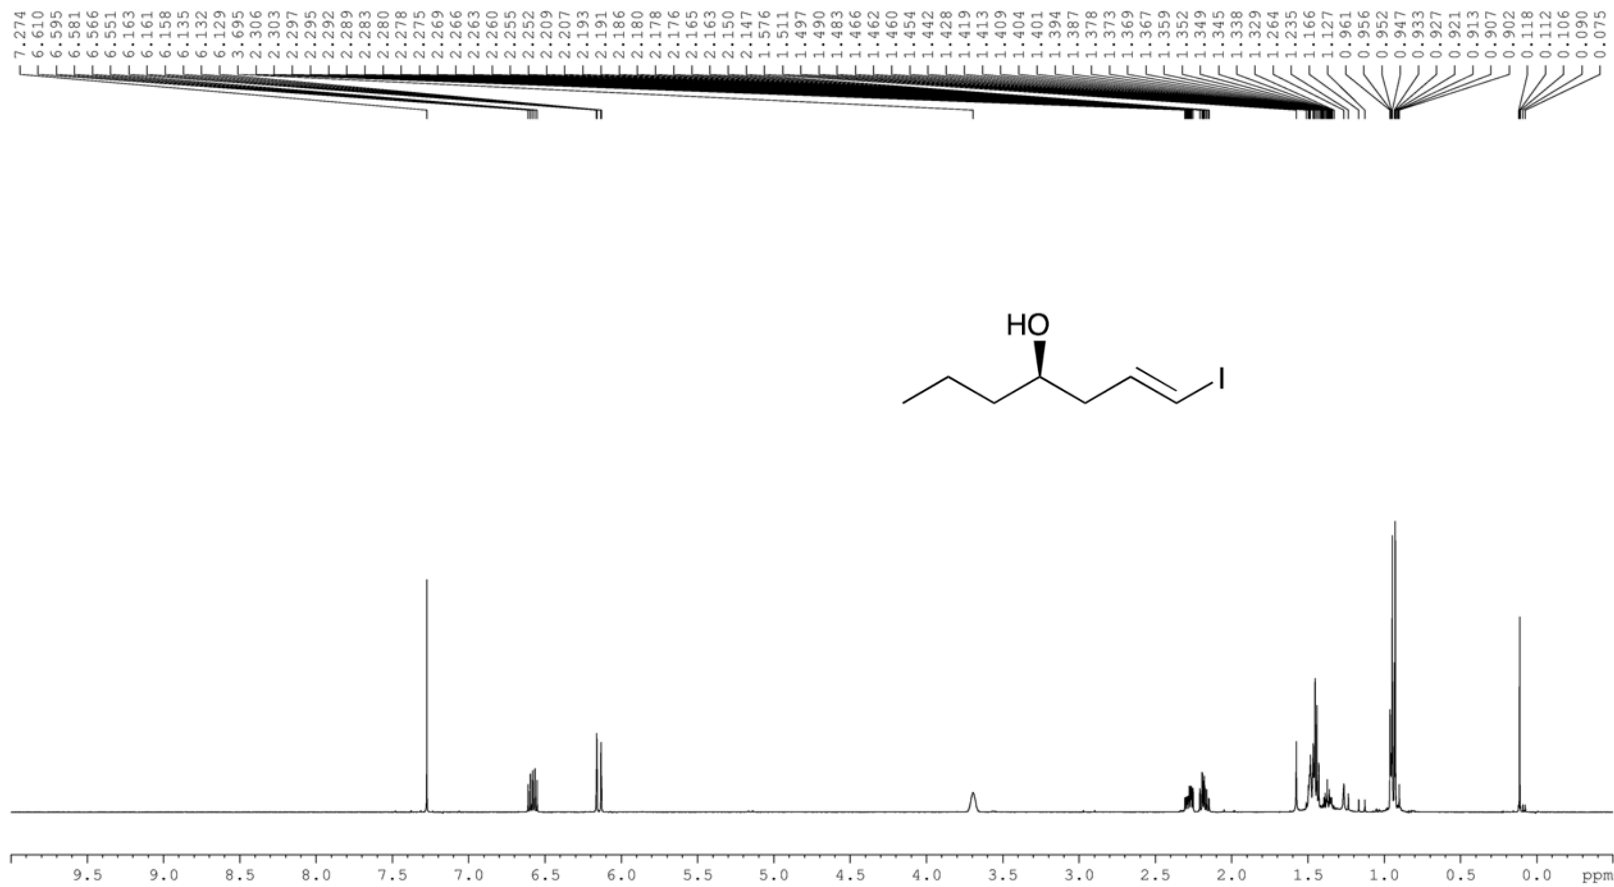

The <sup>1</sup>H NMR Spectrum of Compound (-)-79 in CDCl<sub>3</sub>

S288

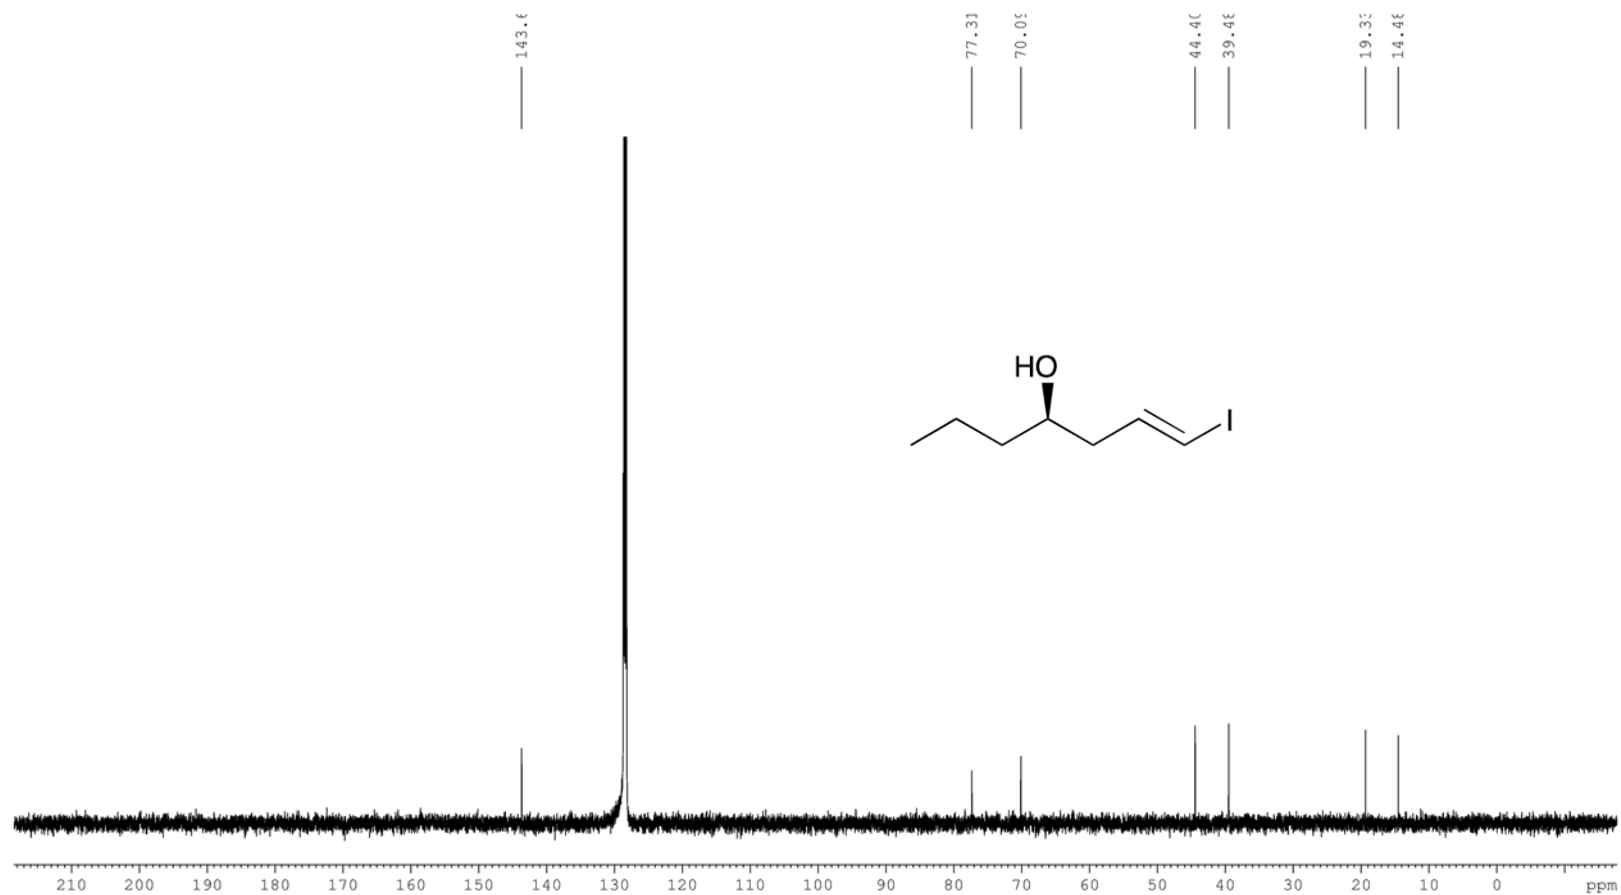

The  $^{13}\text{C}$  NMR Spectrum of Compound (-)-79 in  $\text{CDCl}_3$

S289

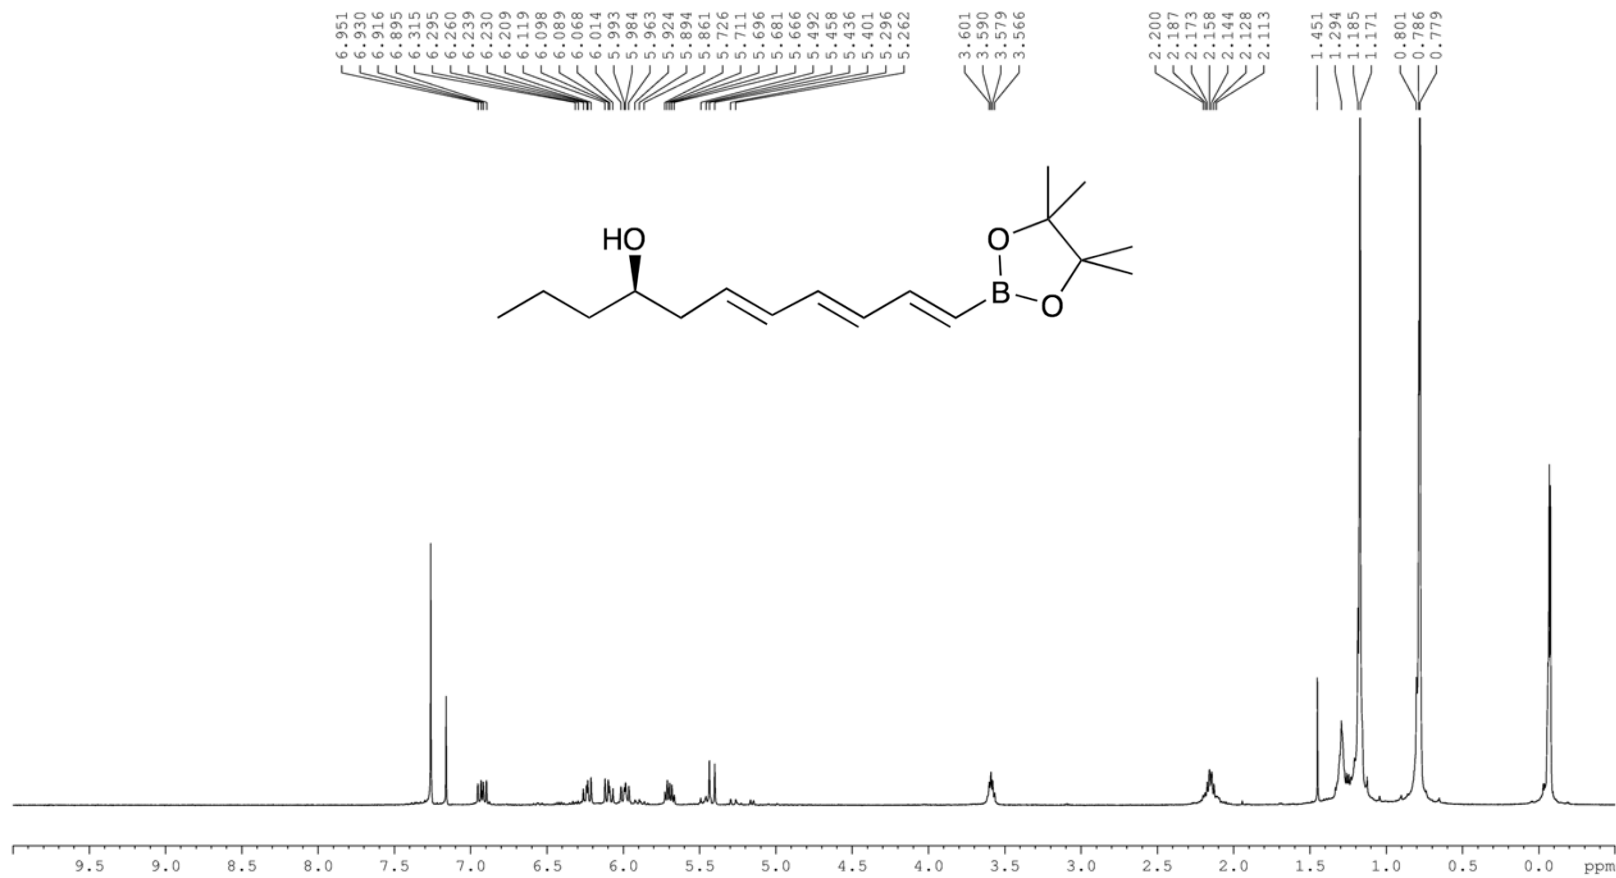

The <sup>1</sup>H NMR Spectrum of Compound (-)-3 in CDCl<sub>3</sub>

S290

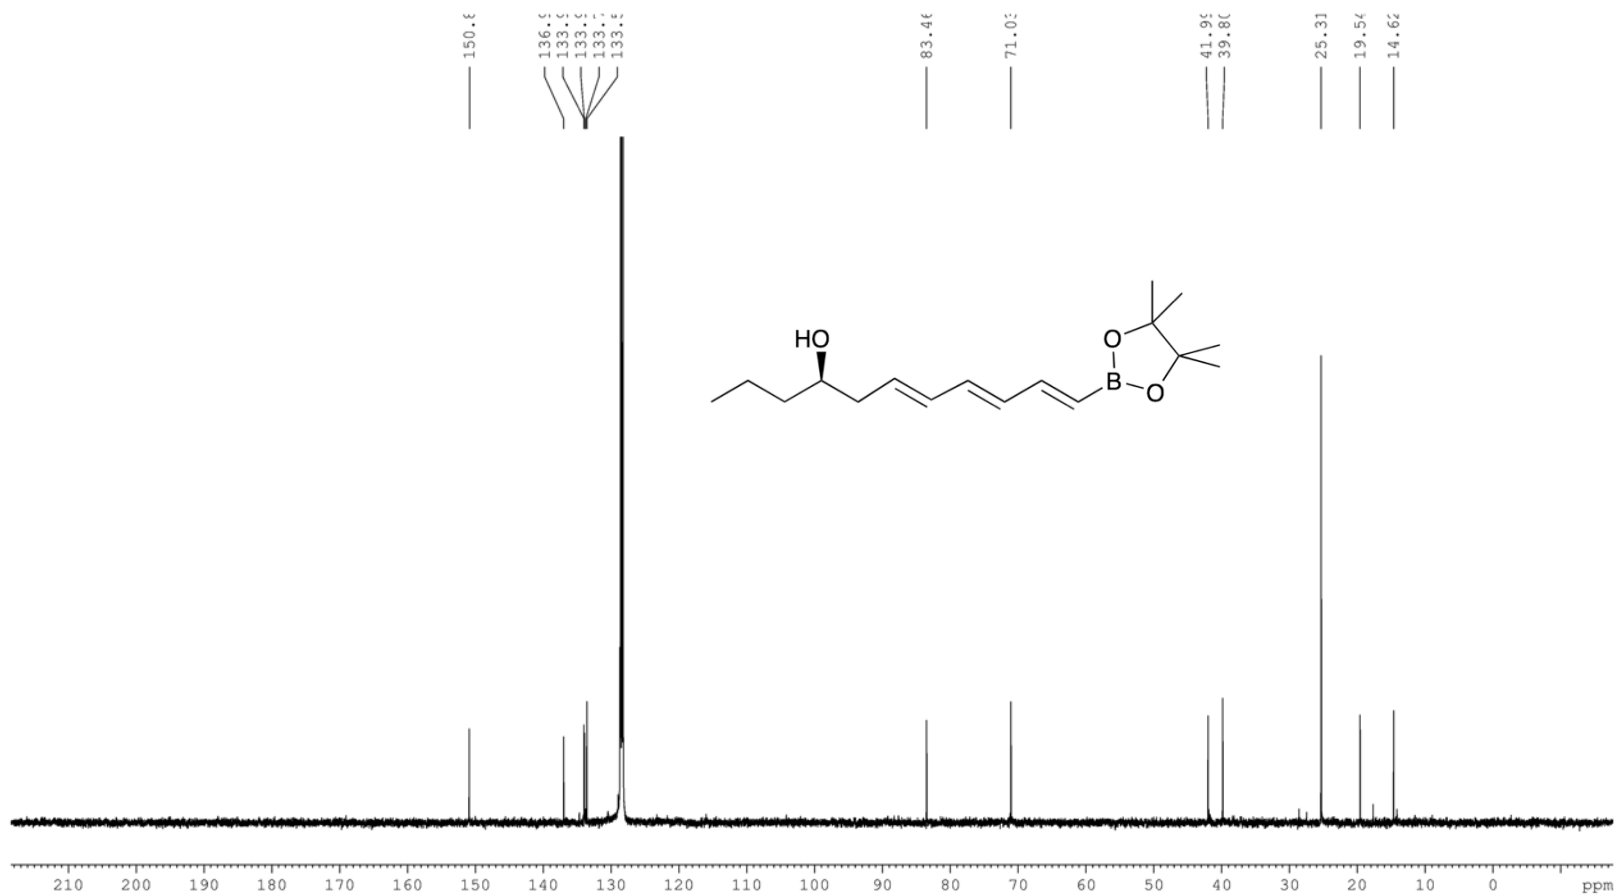

The <sup>1</sup>H NMR Spectrum of Compound (-)-**3** in CDCl<sub>3</sub>

S291

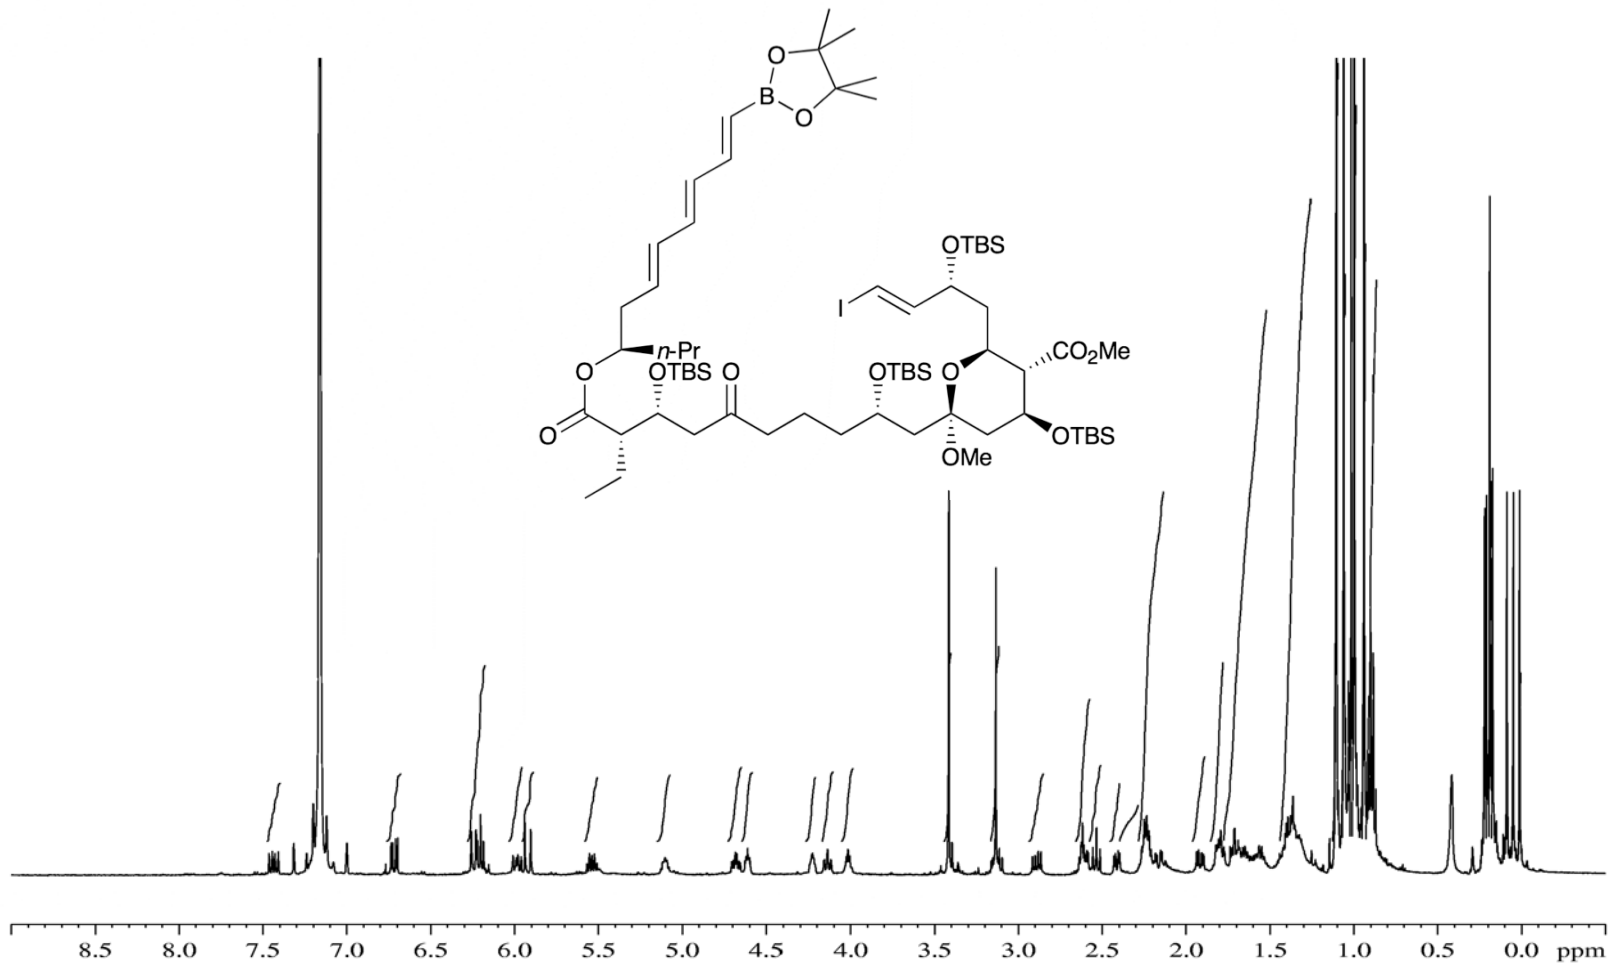

The  $^1\text{H}$  NMR Spectrum of the Product of the Yamaguchi Esterification in  $\text{C}_6\text{D}_6$

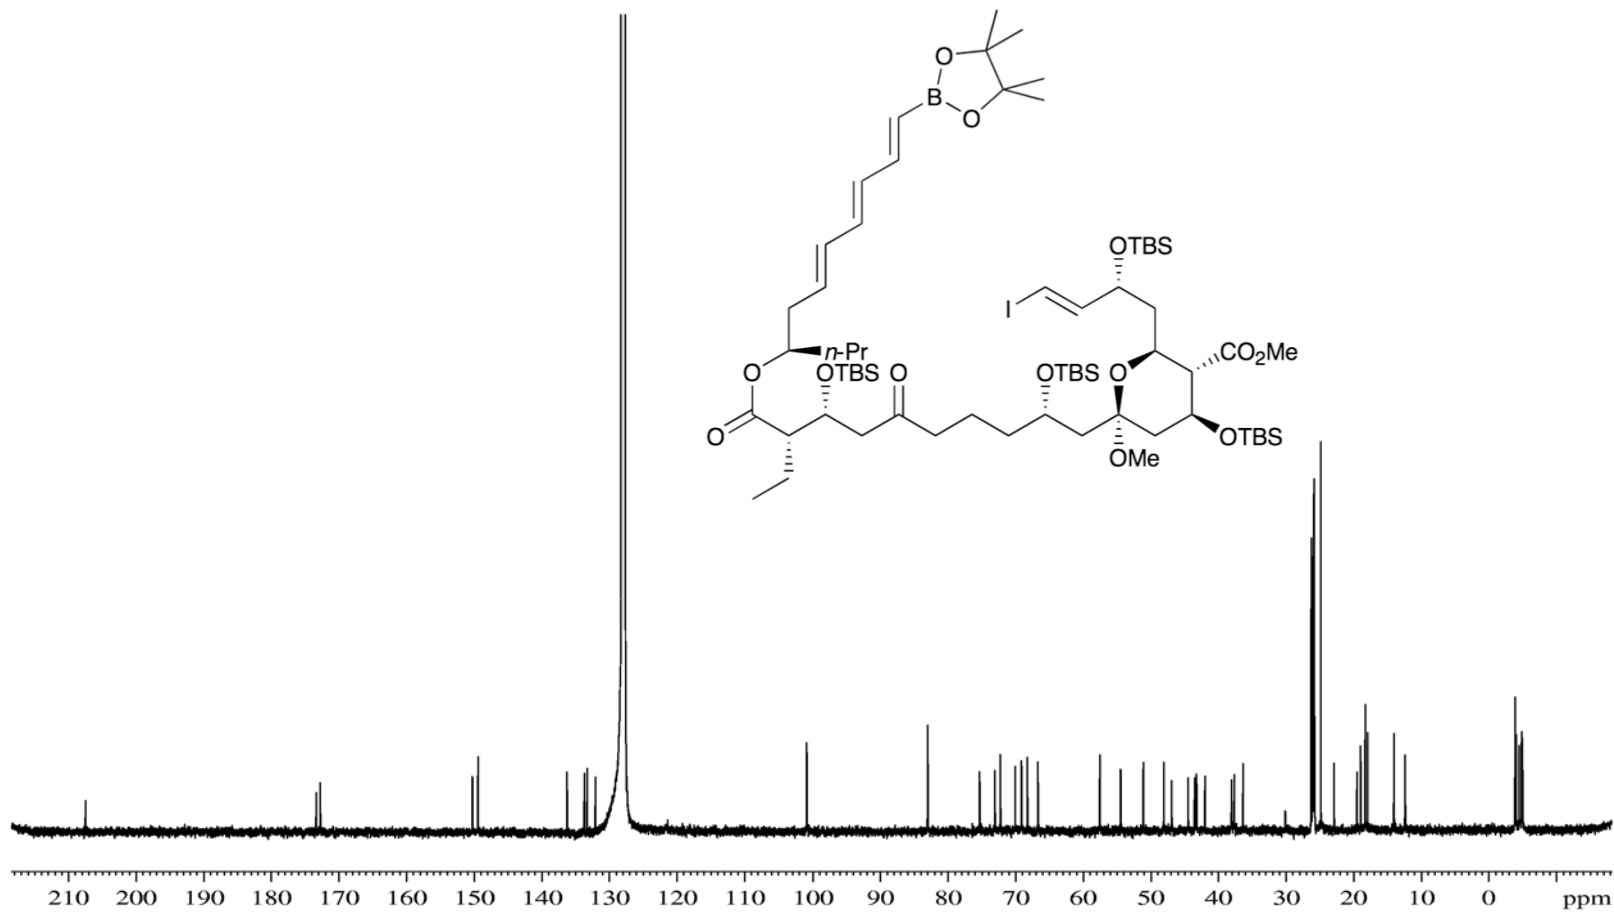

The  $^{13}\text{C}$  NMR Spectrum of the Product of the Yamaguchi Esterification in  $\text{C}_6\text{D}_6$

S293

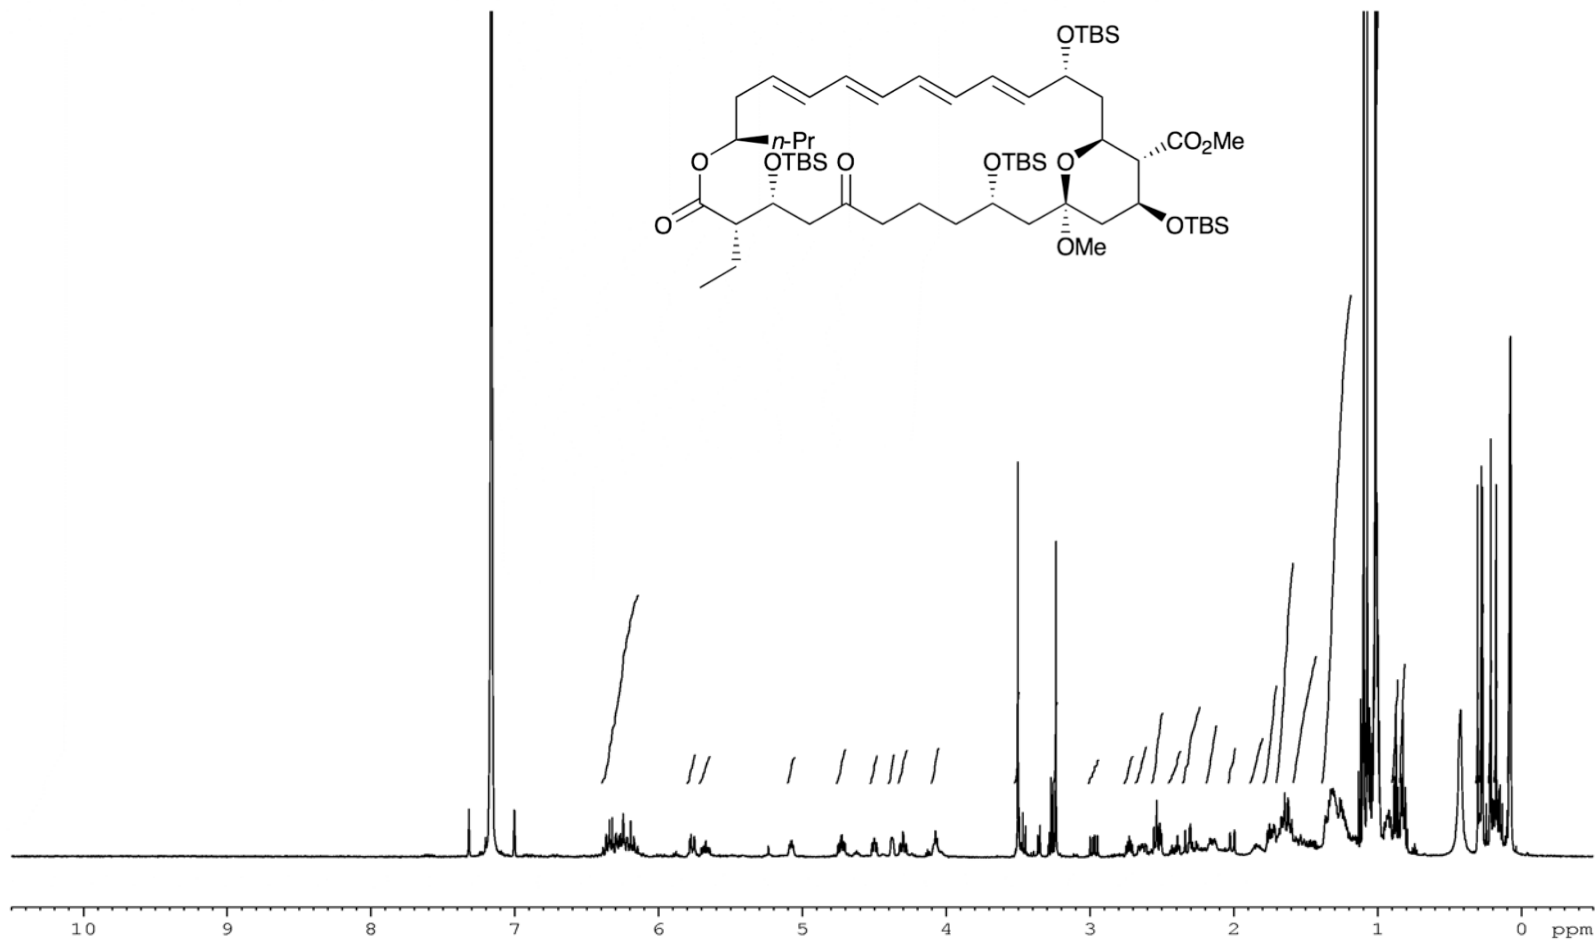

The <sup>1</sup>H NMR Spectrum of Compound (-)-80 in C<sub>6</sub>D<sub>6</sub>

S294

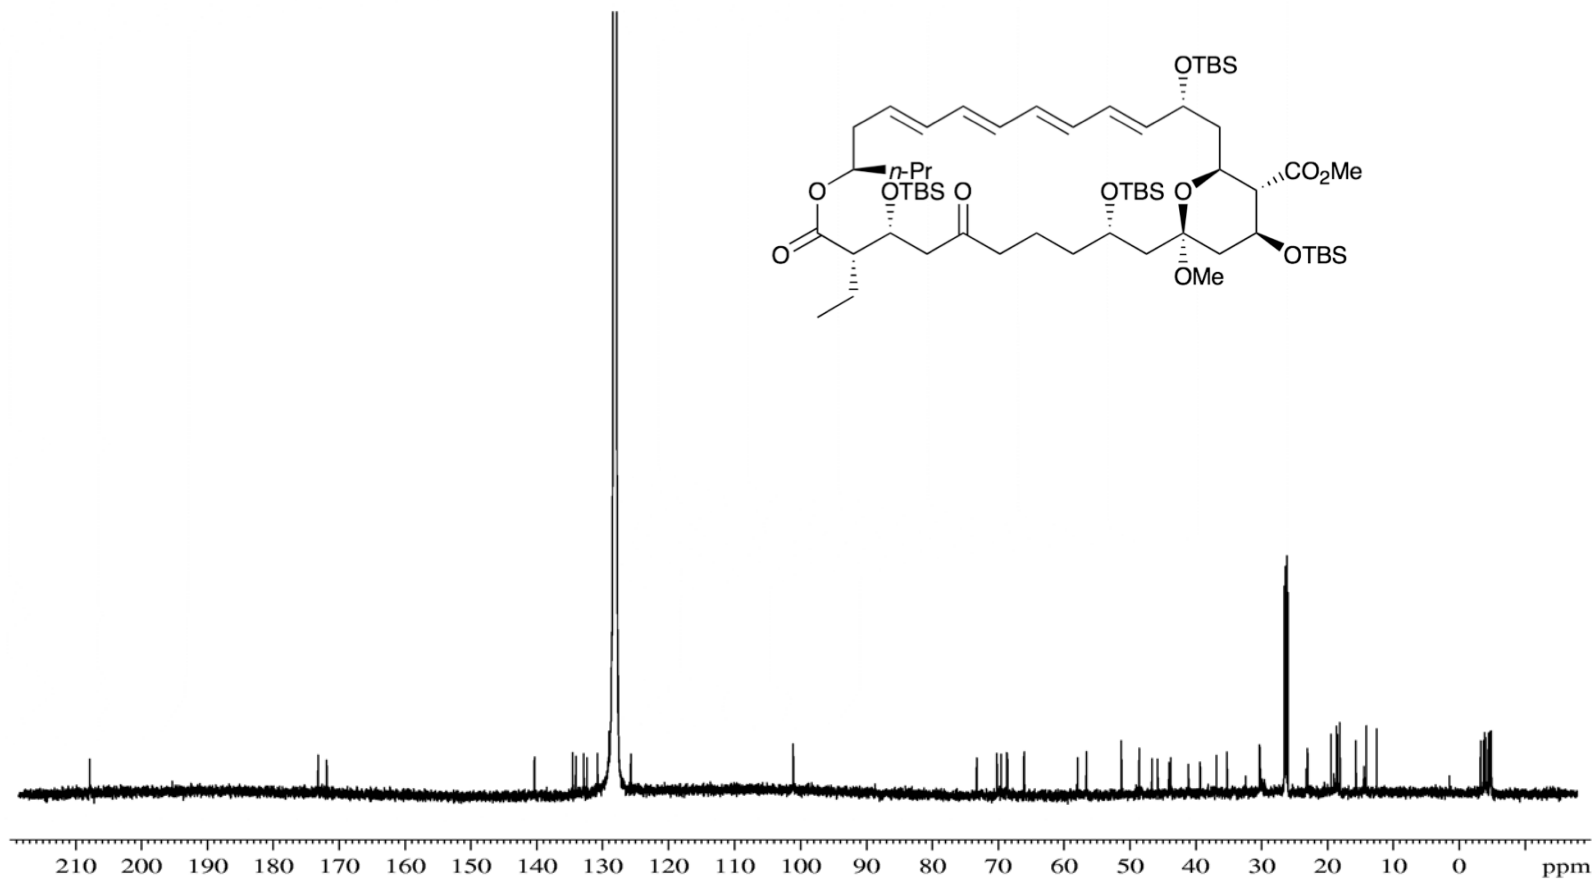

The  $^{13}\text{C}$  NMR Spectrum of Compound (-)-80 in  $\text{C}_6\text{D}_6$



S295

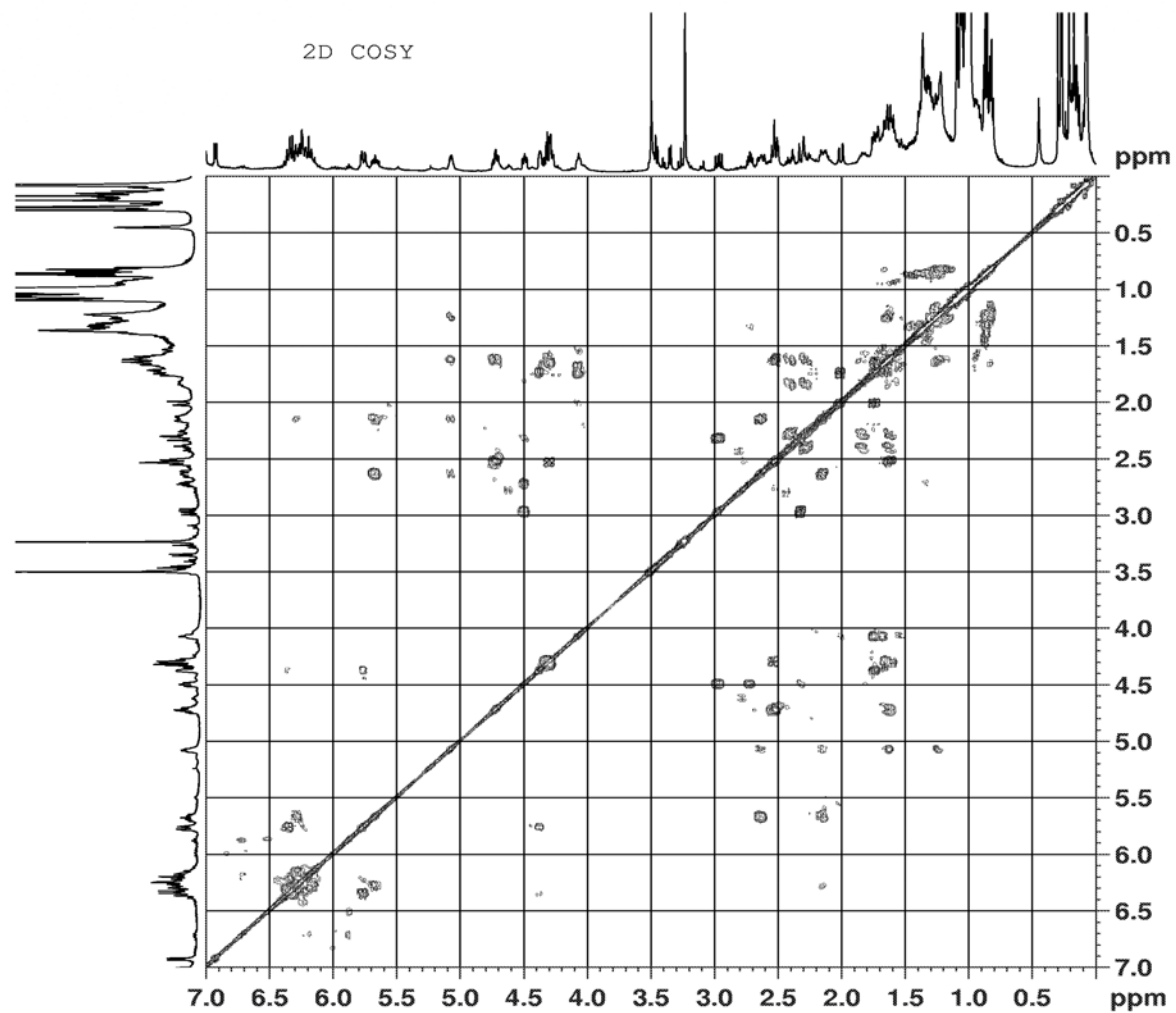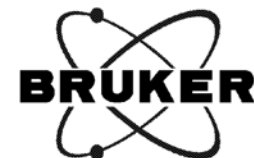

```
Current Data Parameters
NAME      IISD175
EXPNO     7
PROCNO    1

F2 - Acquisition Parameters
Date_     20080715
Time      15.28
INSTRUM   spect
PROBHD    5 mm CPDCH 13C
PULPROG   cosygpgf
TD         2048
SOLVENT   C6D6
NS         4
DS         4
SWH        6009.615 Hz
FIDRES     2.934382 Hz
AQ         0.1704436 sec
RG         1030
DW         83.200 usec
DE         10.00 usec
TE         301.2 K
D0         0.0000300 sec
D1         1.48689198 sec
D13        0.0000400 sec
D16        0.0002000 sec
IN0        0.00016660 sec

----- CHANNEL f1 -----
NUC1       1H
P0         5.00 usec
P1         10.00 usec
PL1        4.00 dB
PL1W       11.39999962 W
SFO1       500.2020008 MHz

----- GRADIENT CHANNEL -----
GPNAM1     SINE.100
GPT1       10.00 %
P16        1000.00 usec

F1 - Acquisition parameters
ND0         1
TD          512
SFO1        500.202 MHz
FIDRES      11.723484 Hz
SW          12.000 ppm
FnMODE      QF

F2 - Processing parameters
SI          2048
SF          500.200550 MHz
WDW         QSINE
SSB         0
LB          0.00 Hz
GB          0
PC          1.00

F1 - Processing parameters
SI          1024
MC2         QF
SF          500.200550 MHz
WDW         QSINE
SSB         0
LB          0.00 Hz
GB          0
```

The COSY NMR Spectrum of Compound (-)-80 in C<sub>6</sub>D<sub>6</sub>

S296

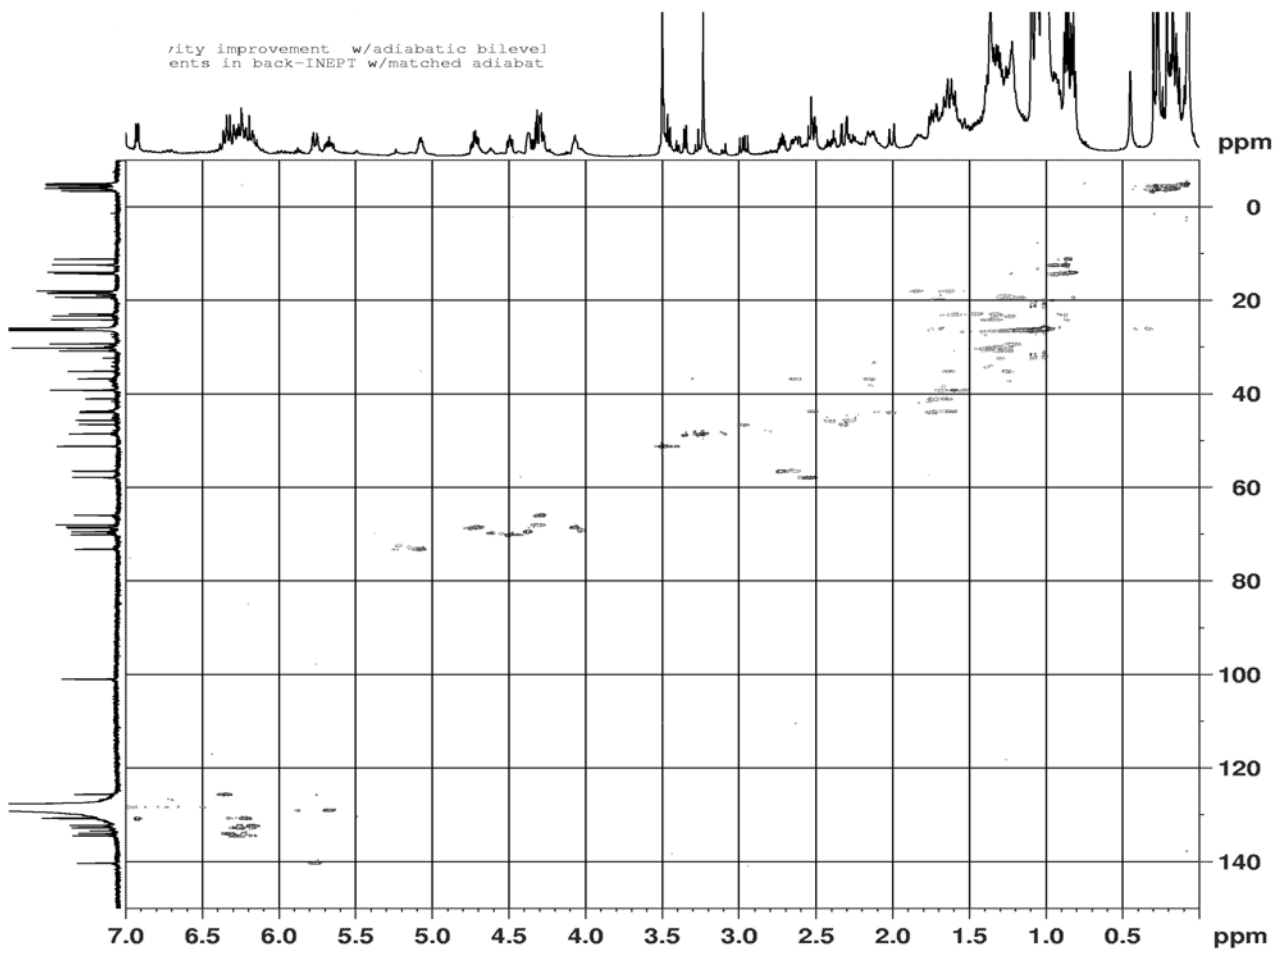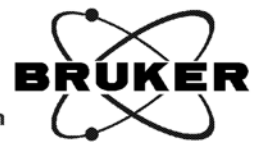

```
Current Data Parameters
NAME      II80195
EXPNO     2
PROCNO    1
F2 - Acquiring Parameters
Date_     20040915
Time     14:42
INSTRUM   spect
PROBHD    5 mm CPCHN 130
PULPROG   zgpg30
SOLVENT   benzene-d6
NS        2048
DS        4
SWH        4000.410 Hz
FIDRES    0.174380 Hz
AQ        0.1440
AQ        0.20000000 sec
DE        83.20000000 sec
TE        301.2 K
NUC1      13C
NUC2      1H
CPDPRG2   0.00000000 sec
C1        1.00000000 sec
D4        0.00172414 sec
D11       0.00000000 sec
D15       0.00000000 sec
D22       0.00000000 sec
IND       0.00000000 sec
SFL       1
----- CHANNEL f1 -----
NUC1      13C
P1        10.00000000 sec
P2        20.00000000 sec
P3        0.00000000 sec
P4        11.00000000 sec
P5        500.00000000 MHz
----- CHANNEL f2 -----
CPDPRG2   zgpg30
NUC1      1H
P1        10.00000000 sec
P2        0.00000000 sec
P3        0.00000000 sec
P4        100.00000000 sec
P5        4.00000000 sec
P6        0.00000000 sec
P7        0.00000000 sec
P8        0.00000000 sec
P9        125.76000000 MHz
P10       12.56000000 sec
P11       12.56000000 sec
P12       12.56000000 sec
P13       12.56000000 sec
P14       12.56000000 sec
P15       12.56000000 sec
P16       12.56000000 sec
P17       12.56000000 sec
P18       12.56000000 sec
P19       12.56000000 sec
P20       12.56000000 sec
P21       12.56000000 sec
P22       12.56000000 sec
P23       12.56000000 sec
P24       12.56000000 sec
P25       12.56000000 sec
P26       12.56000000 sec
P27       12.56000000 sec
P28       12.56000000 sec
P29       12.56000000 sec
P30       12.56000000 sec
P31       12.56000000 sec
P32       12.56000000 sec
P33       12.56000000 sec
P34       12.56000000 sec
P35       12.56000000 sec
P36       12.56000000 sec
P37       12.56000000 sec
P38       12.56000000 sec
P39       12.56000000 sec
P40       12.56000000 sec
P41       12.56000000 sec
P42       12.56000000 sec
P43       12.56000000 sec
P44       12.56000000 sec
P45       12.56000000 sec
P46       12.56000000 sec
P47       12.56000000 sec
P48       12.56000000 sec
P49       12.56000000 sec
P50       12.56000000 sec
P51       12.56000000 sec
P52       12.56000000 sec
P53       12.56000000 sec
P54       12.56000000 sec
P55       12.56000000 sec
P56       12.56000000 sec
P57       12.56000000 sec
P58       12.56000000 sec
P59       12.56000000 sec
P60       12.56000000 sec
P61       12.56000000 sec
P62       12.56000000 sec
P63       12.56000000 sec
P64       12.56000000 sec
P65       12.56000000 sec
P66       12.56000000 sec
P67       12.56000000 sec
P68       12.56000000 sec
P69       12.56000000 sec
P70       12.56000000 sec
P71       12.56000000 sec
P72       12.56000000 sec
P73       12.56000000 sec
P74       12.56000000 sec
P75       12.56000000 sec
P76       12.56000000 sec
P77       12.56000000 sec
P78       12.56000000 sec
P79       12.56000000 sec
P80       12.56000000 sec
P81       12.56000000 sec
P82       12.56000000 sec
P83       12.56000000 sec
P84       12.56000000 sec
P85       12.56000000 sec
P86       12.56000000 sec
P87       12.56000000 sec
P88       12.56000000 sec
P89       12.56000000 sec
P90       12.56000000 sec
P91       12.56000000 sec
P92       12.56000000 sec
P93       12.56000000 sec
P94       12.56000000 sec
P95       12.56000000 sec
P96       12.56000000 sec
P97       12.56000000 sec
P98       12.56000000 sec
P99       12.56000000 sec
P100      12.56000000 sec
----- GRADIENT CHANNELS -----
SPHM1     200.10000000 MHz
SPHM2     200.10000000 MHz
SPHM3     200.10000000 MHz
SPHM4     200.10000000 MHz
SPHM5     200.10000000 MHz
SPHM6     200.10000000 MHz
SPHM7     200.10000000 MHz
SPHM8     200.10000000 MHz
SPHM9     200.10000000 MHz
SPHM10    200.10000000 MHz
SPHM11    200.10000000 MHz
SPHM12    200.10000000 MHz
SPHM13    200.10000000 MHz
SPHM14    200.10000000 MHz
SPHM15    200.10000000 MHz
SPHM16    200.10000000 MHz
SPHM17    200.10000000 MHz
SPHM18    200.10000000 MHz
SPHM19    200.10000000 MHz
SPHM20    200.10000000 MHz
SPHM21    200.10000000 MHz
SPHM22    200.10000000 MHz
SPHM23    200.10000000 MHz
SPHM24    200.10000000 MHz
SPHM25    200.10000000 MHz
SPHM26    200.10000000 MHz
SPHM27    200.10000000 MHz
SPHM28    200.10000000 MHz
SPHM29    200.10000000 MHz
SPHM30    200.10000000 MHz
SPHM31    200.10000000 MHz
SPHM32    200.10000000 MHz
SPHM33    200.10000000 MHz
SPHM34    200.10000000 MHz
SPHM35    200.10000000 MHz
SPHM36    200.10000000 MHz
SPHM37    200.10000000 MHz
SPHM38    200.10000000 MHz
SPHM39    200.10000000 MHz
SPHM40    200.10000000 MHz
SPHM41    200.10000000 MHz
SPHM42    200.10000000 MHz
SPHM43    200.10000000 MHz
SPHM44    200.10000000 MHz
SPHM45    200.10000000 MHz
SPHM46    200.10000000 MHz
SPHM47    200.10000000 MHz
SPHM48    200.10000000 MHz
SPHM49    200.10000000 MHz
SPHM50    200.10000000 MHz
SPHM51    200.10000000 MHz
SPHM52    200.10000000 MHz
SPHM53    200.10000000 MHz
SPHM54    200.10000000 MHz
SPHM55    200.10000000 MHz
SPHM56    200.10000000 MHz
SPHM57    200.10000000 MHz
SPHM58    200.10000000 MHz
SPHM59    200.10000000 MHz
SPHM60    200.10000000 MHz
SPHM61    200.10000000 MHz
SPHM62    200.10000000 MHz
SPHM63    200.10000000 MHz
SPHM64    200.10000000 MHz
SPHM65    200.10000000 MHz
SPHM66    200.10000000 MHz
SPHM67    200.10000000 MHz
SPHM68    200.10000000 MHz
SPHM69    200.10000000 MHz
SPHM70    200.10000000 MHz
SPHM71    200.10000000 MHz
SPHM72    200.10000000 MHz
SPHM73    200.10000000 MHz
SPHM74    200.10000000 MHz
SPHM75    200.10000000 MHz
SPHM76    200.10000000 MHz
SPHM77    200.10000000 MHz
SPHM78    200.10000000 MHz
SPHM79    200.10000000 MHz
SPHM80    200.10000000 MHz
SPHM81    200.10000000 MHz
SPHM82    200.10000000 MHz
SPHM83    200.10000000 MHz
SPHM84    200.10000000 MHz
SPHM85    200.10000000 MHz
SPHM86    200.10000000 MHz
SPHM87    200.10000000 MHz
SPHM88    200.10000000 MHz
SPHM89    200.10000000 MHz
SPHM90    200.10000000 MHz
SPHM91    200.10000000 MHz
SPHM92    200.10000000 MHz
SPHM93    200.10000000 MHz
SPHM94    200.10000000 MHz
SPHM95    200.10000000 MHz
SPHM96    200.10000000 MHz
SPHM97    200.10000000 MHz
SPHM98    200.10000000 MHz
SPHM99    200.10000000 MHz
SPHM100   200.10000000 MHz
----- Acquisition parameters -----
NUC1      13C
NUC2      1H
PROBHD    5 mm CPCHN 130
PULPROG   zgpg30
SOLVENT   benzene-d6
NS        2048
DS        4
SWH        4000.410 Hz
FIDRES    0.174380 Hz
AQ        0.1440
AQ        0.20000000 sec
DE        83.20000000 sec
TE        301.2 K
----- Processing parameters -----
SI        32768
SF        500.13600000 MHz
WDW       EM
SSB       0
GB        0
PC        1.00
----- Processing parameters -----
SI        32768
SF        125.76000000 MHz
WDW       EM
SSB       0
GB        0
```

The HSQC NMR Spectrum of Compound (-)-80 in C<sub>6</sub>D<sub>6</sub>

S297

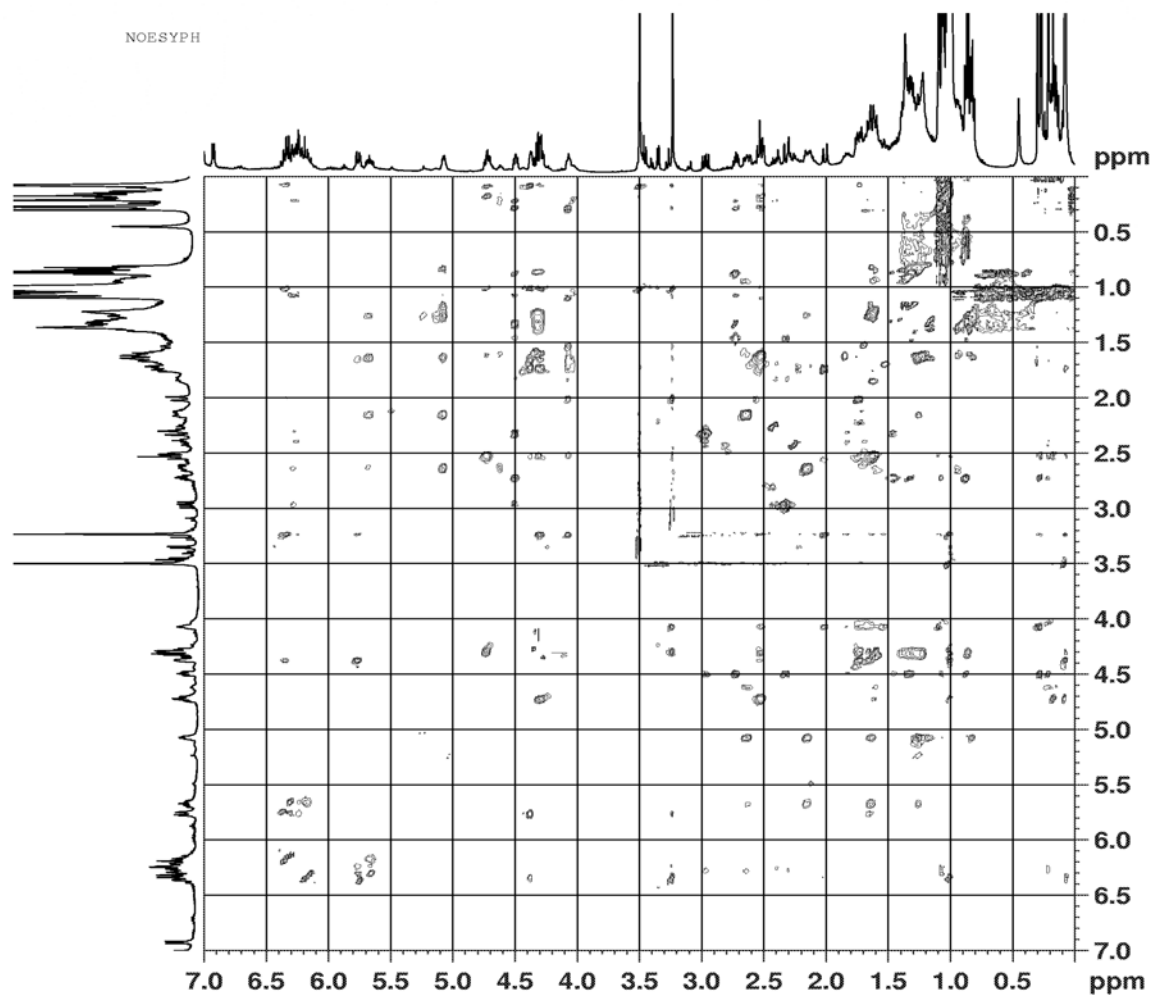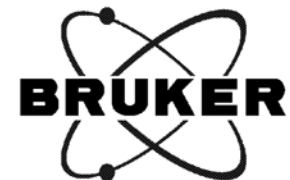

```

Current Data Parameters
NAME      IISD175
EXPNO    8
PROCNO   1

F2 - Acquisition Parameters
Date_    20090715
Time     16.35
INSTRUM  spect
PROBHD   5 mm CPDCH 13C
PULPROG  noesyph
TD       2048
SOLVENT  C6D6
NS       40
DS       16
SWH      6009.615 Hz
FIDRES   2.934382 Hz
AQ       0.170436 sec
RG       50.8
DW       83.200 usec
DE       10.00 usec
TE       301.2 K
DQ       0.0007057 sec
D1       2.0000000 sec
D8       0.8000001 sec
IN0      0.00016660 sec

----- CHANNEL f1 -----
NUC1     1H
P1       10.00 usec
PL1      4.00 dB
PL1W     11.39999962 W
SFO1     500.2020008 MHz

F1 - Acquisition parameters
ND0      1
TD       477
SFO1     500.202 MHz
FIDRES   12.583698 Hz
SW       12.000 ppm
FnMODE   States-TPPI

F2 - Processing parameters
SI       2048
SF       500.2000550 MHz
WDW      QSINE
SSB      2
LB       0.00 Hz
GB       0
PC       1.00

F1 - Processing parameters
SI       1024
MC2      States-TPPI
SF       500.2000550 MHz
WDW      QSINE
SSB      2
LB       0.00 Hz
GB       0

```

The NOESY NMR Spectrum of Compound (-)-**80** in  $C_6D_6$
